# Supplementary material
Source: PubMed Central journal article supplement (PMC8999822)

## SUPPLEMENTARY INFORMATION

Supplementary tables and table legends 1-5

Supplementary figures 1 (raw gel data) and 2 (FACS gating strategies for immune cell analysis)

Raw data (weight monitoring over disease time course) of *in vivo* experiment (oxazolone colitis)

Total organic synthesis of BfaGC analogue (SB2201-SB2223) library

| Name   | Molecular Weight | Sphingosine Structure | Fatty Acyl Structure | MS2 Fingerprint | Retention Time |
|--------|------------------|-----------------------|----------------------|-----------------|----------------|
| SB2201 | 717.58           | n18                   | 3-OH-n16             | 504             | 8.47           |
| SB2202 | 703.56           | n18                   | 3-OH-n15             | 504             | 8.05           |
| SB2203 | 731.59           | n18                   | 3-OH-i17             | 504             | 8.72           |
| SB2204 | 731.59           | n18                   | 3-OH-a17             | 504             | 8.72           |
| SB2205 | 731.59           | n19                   | 3-OH-n16             | 518             | 8.84           |
| SB2206 | 717.58           | n19                   | 3-OH-n15             | 518             | 8.45           |
| SB2207 | 745.61           | n19                   | 3-OH-i17             | 518             | 9.08           |
| SB2208 | 745.61           | n19                   | 3-OH-a17             | 518             | 9.06           |
| SB2209 | 703.56           | i17                   | 3-OH-n16             | 490             | 7.92           |
| SB2210 | 689.54           | i17                   | 3-OH-n15             | 490             | 7.40           |
| SB2211 | 717.58           | i17                   | 3-OH-i17             | 490             | 8.24           |
| SB2212 | 717.58           | i17                   | 3-OH-a17             | 490             | 8.23           |
| SB2213 | 703.56           | a17                   | 3-OH-n16             | 490             | 7.87           |
| SB2214 | 689.54           | a17                   | 3-OH-n15             | 490             | 7.35           |
| SB2215 | 717.58           | a17                   | 3-OH-i17             | 490             | 8.23           |
| SB2216 | 717.58           | a17                   | 3-OH-a17             | 490             | 8.20           |
| SB2217 | 717.58           | i17                   | 3-OH-n17             | 490             | 8.33           |
| SB2218 | 717.58           | a17                   | 3-OH-n17             | 490             | 8.33           |
| SB2219 | 717.58           | n17                   | 3-OH-n17             | 490             | 8.42           |
| SB2220 | 717.58           | n17                   | 3-OH-i17             | 490             | 8.35           |
| SB2221 | 717.58           | n17                   | 3-OH-a17             | 490             | 8.33           |
| SB2222 | 701.58           | i17                   | n17                  | 538*            | 8.91           |
| SB2223 | 703.56           | n16                   | 3-OH-n17             | 476             | 8.06           |

|   |                                    |
|---|------------------------------------|
| n | straight-chain                     |
| i | Isomethyl (omega-2)-branching      |
| a | Ante-isomethyl (omega-3)-branching |

\*does not have acyl 3-OH: fingerprint ion is [M-H-162]

**Supplementary Table 1.** Molecular weight and sphingolipid structure information for 23 synthetic BfaGCs.

| Name             | Sequence                                                              |
|------------------|-----------------------------------------------------------------------|
| pNJR6_3671_L-F   | AAC GAA AAA TTT AAA CAA ATT ATT AAT CAG AGT CTG TAT TGG CTG CCC T     |
| pNJR6_3671-L-R   | ATC GAA CGT ATC GTT AGT TAT TAG TTA TTT TCG ATT GAG C                 |
| pNJR6_3671-Rg-F  | CTA ATA ACT AAC GAT ACG TTC GAT AAA TGA ACT ACA AAA TAA CAA CCC       |
| pNJR6_3671-Rg-R  | CGG ATC CCC GGG TAC TCG CCA CGT CCG CAA CCC                           |
| 3671-500F (1F)   | GAC GCT TCG CCT CAG AAA C                                             |
| 3671+1520R (1R)  | TTC AAA AGT ATC GGG ACG CAT C                                         |
| pNBU2-3671F (2F) | AAA GAC ATA TAA AAG AAA AGA CAC CAT GAA AGA AAT AGA CTG GGC TAA TCT G |
| pNBU2-3671R (2R) | CAC TGG AAG ATA GGC AAT TAG TTA TTC AAC AAT AGT CAC CCA TCC G         |

| Name      | Sequence                       |
|-----------|--------------------------------|
| Leu-3     | CAC TTG ACT GTT GTA GAT AAA GC |
| Leu-4     | CAT CTT CAT TGC AGC ATT ATC C  |
| BACT1369F | CGG TGA ATA CGT TCY CGG        |
| PROK1492R | GGW TAC CTT GTT ACG ACT T      |

**Supplementary Table 2.** Primer sequences used for the *B. fragilis* KO generation (top) and abundance analysis in HMB stool samples by qPCR (bottom).

|                                      | 2C12 TCR-mCD1d-<br>SB2217                                 | 2C12 TCR-mCD1d-<br>SB2219                                 |
|--------------------------------------|-----------------------------------------------------------|-----------------------------------------------------------|
| <b>Data collection</b>               |                                                           |                                                           |
| Temperature                          | 100K                                                      | 100K                                                      |
| Resolution limits (Å)                | 76.79-2.4 (2.5-2.4)                                       | 48.56-2.8 (2.9-2.8)                                       |
| Space Group                          | P2 <sub>1</sub> 2 <sub>1</sub> 2 <sub>1</sub>             | P2 <sub>1</sub> 2 <sub>1</sub> 2 <sub>1</sub>             |
| Cell dimensions (Å)                  | a=58.5, b=80.9, c=243.3<br>$\alpha=\beta=\gamma=90^\circ$ | a=58.3, b=80.6, c=242.8<br>$\alpha=\beta=\gamma=90^\circ$ |
| Total N <sup>o</sup> . observations  | 299101 (44393)                                            | 267870 (36163)                                            |
| N <sup>o</sup> . unique observations | 46370 (6678)                                              | 29106 (4070)                                              |
| Multiplicity                         | 6.5 (6.6)                                                 | 9.2 (8.9)                                                 |
| Data completeness                    | 100 (100)                                                 | 99.2 (97)                                                 |
| Wilson B-factors (Å <sup>2</sup> )   | 62.1                                                      | 82.7                                                      |
| I/ $\sigma$ <sub>1</sub>             | 7.2 (1.9)                                                 | 10.8 (2.1)                                                |
| R <sub>p.i.m</sub> <sup>1</sup> (%)  | 5.5 (36.6)                                                | 4.2 (28.3)                                                |
| <b>Refinement statistics</b>         |                                                           |                                                           |
| R <sub>factor</sub> <sup>2</sup> (%) | 18.4                                                      | 20.1                                                      |
| R <sub>free</sub> <sup>3</sup> (%)   | 23                                                        | 27.4                                                      |
| Non-hydrogen atoms                   |                                                           |                                                           |
| - Protein                            | 6530                                                      | 6542                                                      |
| - Water                              | 226                                                       | 152                                                       |
| - Heterogen                          | 152                                                       | 155                                                       |
| Ramachandran plot (%)                |                                                           |                                                           |
| - Allowed region                     | 99.52                                                     | 99.52                                                     |
| - Disallowed region                  | 0.48                                                      | 0.48                                                      |
| rmsd bonds (Å)                       | 0.010                                                     | 0.008                                                     |
| rmsd angles (°)                      | 1.15                                                      | 1.03                                                      |

$$^1 R_{p.i.m} = \frac{\sum_{hkl} [1/(N-1)]^{1/2} \sum_i |I_{hkl, i} - \langle I_{hkl} \rangle|}{\sum_{hkl} \langle I_{hkl} \rangle}$$

$$^2 R_{factor} = \frac{(\sum | |F_o| - |F_c| | )}{(\sum |F_o| )} - \text{for all data except as indicated in footnote 3.}$$

<sup>3</sup> 5% of data was used for the R<sub>free</sub> calculation.

Values in the parentheses refer to the highest resolution shell.

**Supplementary Table 3.** Data collection and refinement statistics of X-ray crystallography study.



| TCR gene      | TCR residues       | CD1d residues                          | Bond type |
|---------------|--------------------|----------------------------------------|-----------|
| CDR3 $\alpha$ | Asp94-O $\delta$ 1 | Arg79-N $\eta$ 2                       | HB        |
| CDR3 $\alpha$ | Asp94-O $\delta$ 2 | Arg79-N $\eta$ 1                       | HB        |
| CDR3 $\alpha$ | Asp94              | Arg79                                  | VDW       |
| CDR3 $\alpha$ | Arg95-N $\epsilon$ | Asp80-O $\delta$ 1, Asp80-O $\delta$ 2 | HB        |
| CDR3 $\alpha$ | Arg95-N $\eta$ 1   | Arg79-N $\epsilon$                     | HB        |
| CDR3 $\alpha$ | Arg95-N $\eta$ 2   | Arg79-N $\eta$ 2                       | HB        |
| CDR3 $\alpha$ | Arg95              | Ser76, Arg79, Asp80                    | VDW       |
| CDR3 $\alpha$ | Gly96-O            | Ala152-O                               | HB        |
| CDR3 $\alpha$ | Gly96              | Ala152, Asp153                         | VDW       |
| CDR3 $\alpha$ | Ser97              | Arg79, Val149, Ala152, Asp153          | VDW       |
| CDR3 $\alpha$ | Leu99-O            | Arg79-N $\eta$ 2                       | HB        |
| CDR3 $\alpha$ | Leu99              | Asp80, Leu84, Met87, Val149            | VDW       |
| CDR3 $\alpha$ | Gly100             | Arg79                                  | VDW       |
| CDR3 $\alpha$ | Arg103             | Arg79, Glu83                           | VDW       |
| CDR2 $\beta$  | Tyr48-O $\eta$     | Glu83-O $\epsilon$ 2                   | HB        |
| CDR2 $\beta$  | Tyr48              | Glu83, Lys86                           | VDW       |
| CDR2 $\beta$  | Tyr50-O $\eta$     | Glu83-O $\epsilon$ 2                   | HB        |
| CDR2 $\beta$  | Tyr50              | Glu83, Met87, Lys86                    | VDW       |
| CDR2 $\beta$  | Glu56              | Lys86                                  | VDW       |
| CDR3 $\beta$  | Glu97-O $\delta$ 2 | Lys148-N $\zeta$                       | HB        |
| CDR3 $\beta$  | Glu97              | Ala152, Lys148                         | VDW       |
| TCR gene      | TCR residues       | SB2217 atoms                           | Bond type |
| CDR1 $\alpha$ | Pro28              | C1, O5"                                | VDW       |
| CDR1 $\alpha$ | Asn30-N $\delta$ 2 | 3"-OH                                  | HB        |
| CDR1 $\alpha$ | Asn30              | 4"-OH, C3, 3"-OH                       | VDW       |
| CDR3 $\alpha$ | Arg95              | C1, C2, 2"-OH, O3                      | VDW       |
| CDR3 $\alpha$ | Gly96-N            | 2"-OH                                  | HB        |
| CDR3 $\alpha$ | Gly96              | C2, 3"-OH                              | VDW       |

HB: Hydrogen bond, VDW: van der Waals, Cut-off at 4 Å for VDW interactions and 3.5 Å for HB.

**Supplementary Table 4.** 2C12 TCR contacts with SB2217 and mCD1d.

| TCR gene      | TCR residues         | CD1d residues                                               | Bond type |
|---------------|----------------------|-------------------------------------------------------------|-----------|
| CDR1 $\alpha$ | Thr27                | Val72                                                       | VDW       |
| CDR1 $\alpha$ | Pro28                | Ser76                                                       | VDW       |
| CDR3 $\alpha$ | Asp94-O $\delta$ 1   | Arg79-N $\eta$ 1, N $\eta$ 2                                | HB        |
| CDR3 $\alpha$ | Asp94                | Arg79                                                       | VDW       |
| CDR3 $\alpha$ | Arg95-N $\epsilon$   | Asp80-O $\delta$ 1                                          | HB        |
| CDR3 $\alpha$ | Arg95                | Ser76, Arg79, Asp80                                         | VDW       |
| CDR3 $\alpha$ | Gly96-O              | Ala152-O                                                    | HB        |
| CDR3 $\alpha$ | Gly96                | Ala152, Asp153                                              | VDW       |
| CDR3 $\alpha$ | Ser97                | Val149, Ala152                                              | VDW       |
| CDR3 $\alpha$ | Leu99-O              | Arg79-N $\eta$ 2                                            | HB        |
| CDR3 $\alpha$ | Leu99                | Asp80, Glu83, Leu84, Met87, Val149                          | VDW       |
| CDR3 $\alpha$ | Gly100               | Arg79                                                       | VDW       |
| CDR3 $\alpha$ | Arg101               | Arg79, Glu83                                                | VDW       |
| CDR2 $\beta$  | Tyr48-O $\eta$       | Glu83-O $\epsilon$ 1, Glu83-O $\epsilon$ 2, Lys86-N $\zeta$ | HB        |
| CDR2 $\beta$  | Tyr48                | Glu83, Lys86                                                | VDW       |
| CDR2 $\beta$  | Tyr50-O $\eta$       | Glu83-O $\epsilon$ 2                                        | HB        |
| CDR2 $\beta$  | Tyr50                | Glu83, Met87                                                | VDW       |
| CDR2 $\beta$  | Glu56-O $\epsilon$ 1 | Arg21-N $\eta$ 1                                            | HB        |
| CDR2 $\beta$  | Glu56                | Lys86                                                       | VDW       |
| CDR3 $\beta$  | Glu96                | Lys148, Val149, Ala152                                      | VDW       |
| TCR gene      | TCR residues         | SB2219 atoms                                                | Bond type |
| CDR1 $\alpha$ | Pro28                | O5", C6, C1                                                 | VDW       |
| CDR1 $\alpha$ | Asn30-N $\delta$ 2   | 3"-OH                                                       | HB        |
| CDR1 $\alpha$ | Asn30                | C3, 4"-OH, C2, 3"-OH                                        | VDW       |
| CDR1 $\alpha$ | Asn30-N $\delta$ 2   | 4"-OH                                                       | HB        |
| CDR3 $\alpha$ | Asp94, Arg95         | C1                                                          | VDW       |
| CDR3 $\alpha$ | Arg95, Gly96         | C2, 3"-OH                                                   | VDW       |
| CDR3 $\alpha$ | Gly96-N              | 2"-OH                                                       | HB        |
| CDR3 $\alpha$ | Arg95                | C1, O1, O3, 2"-OH                                           | VDW       |

HB: Hydrogen bond, VDW: van der Waals, Cut-off at 4 Å for VDW interactions and 3.5 Å for HB.

**Supplementary table 5.** 2C12 TCR contacts with SB2219 and mCD1d.

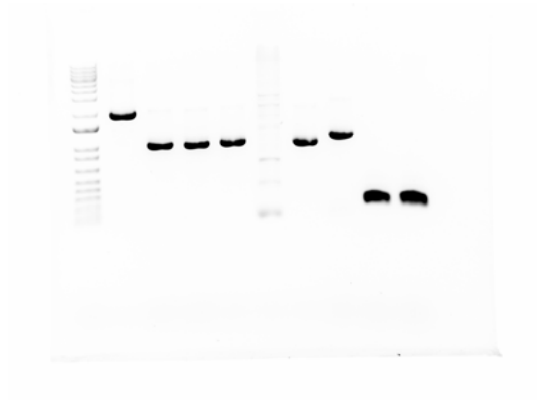

Supplementary Figure 1. Raw gel image for Extended figure 8A.

A

colonic NKT

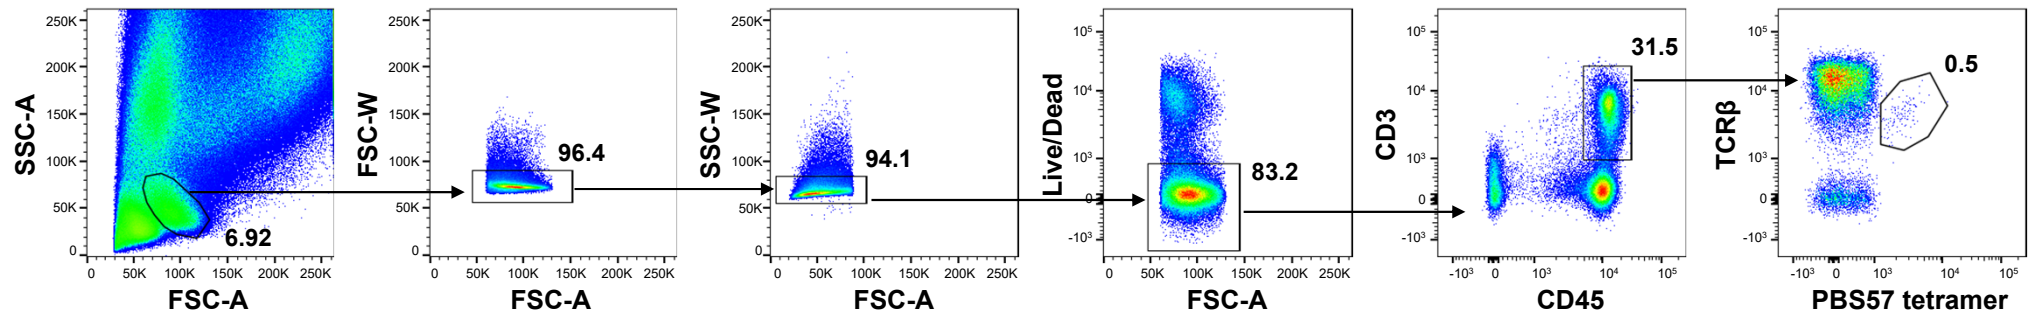

B

splenic DC

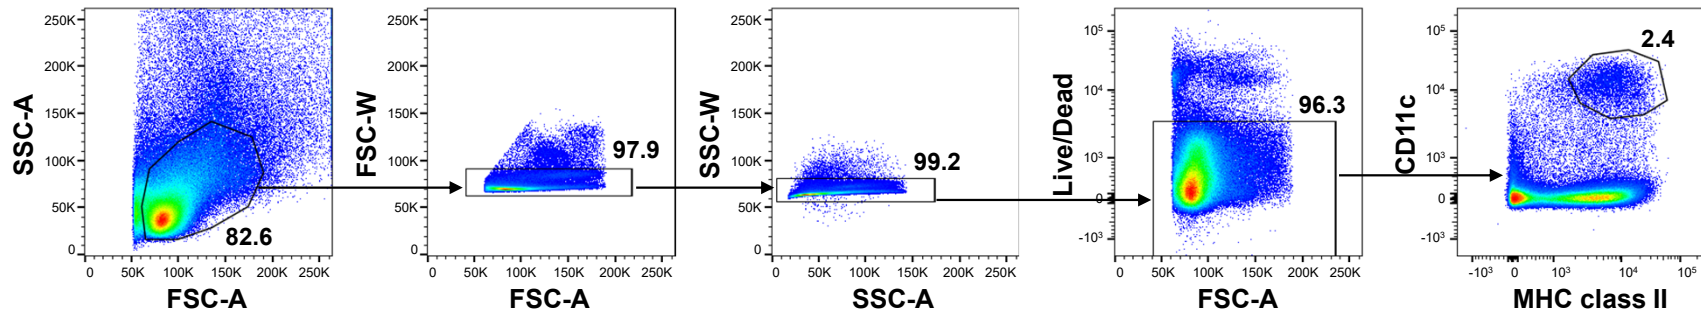

Supplementary Figure 2. Gating and sorting strategies of (A) colonic NKT cells and (B) splenic DCs.

| Day after challenge | Vehicle  |         |         |         |         |         |
|---------------------|----------|---------|---------|---------|---------|---------|
|                     | 0        | 100     | 100     | 100     | 100     | 100     |
| 1                   | 93.5115  | 82.963  | 94.9807 | 89.1975 | 89.5604 | 86.6883 |
| 2                   | 88.5496  | 81.4815 | 99.2278 | 84.8765 | 81.8681 | 80.1948 |
| 3                   | deceased | 80      | 98.4556 | 83.0247 | 78.022  | 82.7922 |

  

| SB2217 |          |          |          |         |         |          |
|--------|----------|----------|----------|---------|---------|----------|
|        | 100      | 100      | 100      | 100     | 100     | 100      |
|        | 99.5851  | 98.8372  | 96.9231  | 93.5211 | 94.2197 | 102.907  |
|        | 105.3942 | 101.1628 | 100.3846 | 89.8592 | 94.2197 | 103.7791 |
|        | 108.7137 | 106.2016 | 101.9231 | 87.8873 | 98.8439 | 103.7791 |

All data are weight(%) based on day 0 measurement of individual animal as 100%.

## Supplemental Material for Oh *et al.* : Synthesis of BfaGC analog library

### A. Synthesis of carboxylic acid building blocks

For the preparation of acyl building blocks, we first synthesized C<sub>13</sub> alkyl iodide having diol at 1,3 position (**S12**) from L-(–)-malic acid. Then we obtained acyl building blocks (**S14**{*n*17}–**S14**{*n*16}) as a carboxylic acid form after the introduction of various normal and branch structure via sp<sup>3</sup>–sp<sup>3</sup> cross-coupling followed by oxidation.

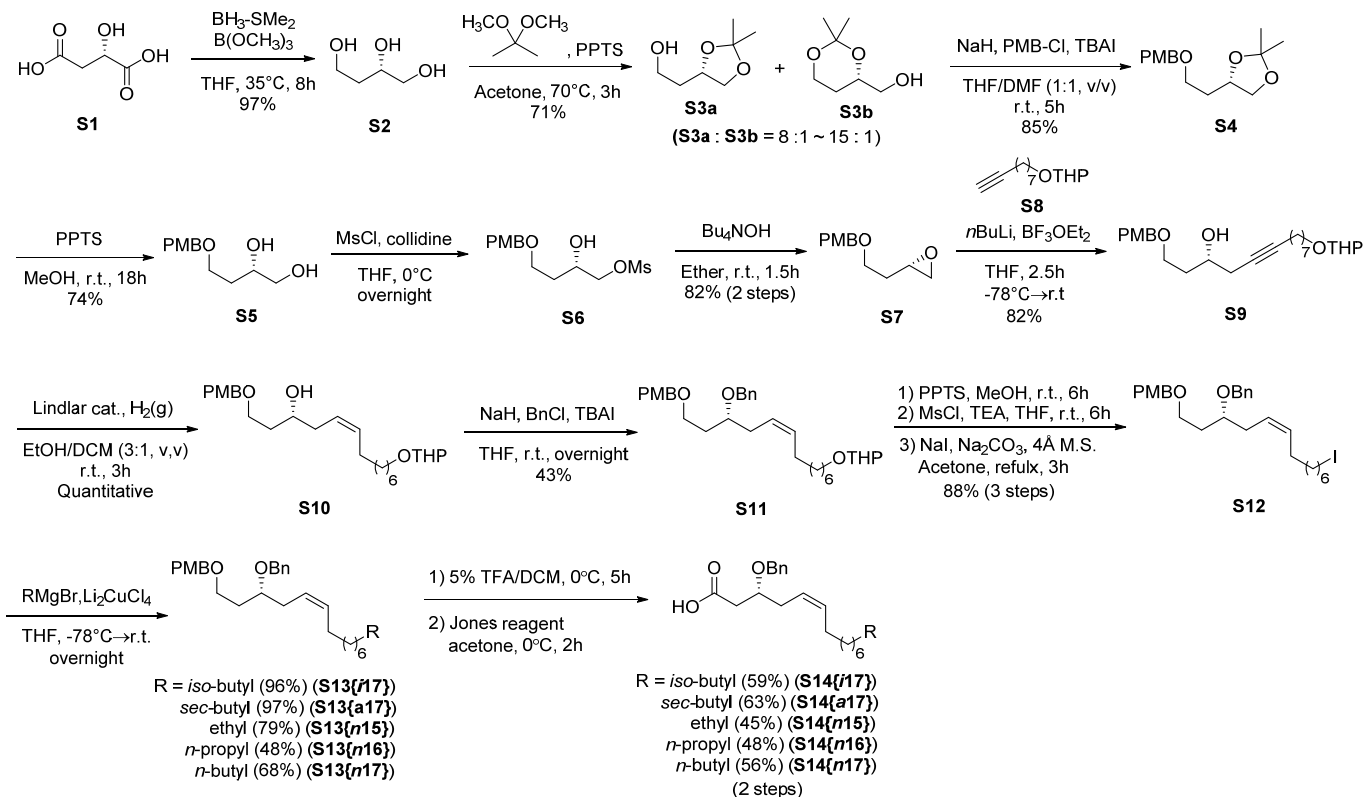

#### Synthesis of **S2**, (S)-butane-1,2,4-triol

To a solution of boron dimethyl sulfide complex (157 mmol) and trimethyl borate (269 mmol) in dry THF (70 mL) under Ar(g) was added **S1** (L-(–)-malic acid, 44.8 mmol) in dry THF (20 mL) dropwise for 1 hr at water bath, then the reaction mixture was stirred at 35 °C for overnight. After the completion of the reaction monitored by TLC, the reaction was quenched by slow adding of MeOH (10 mL) at water bath and stirred for additional 4 hr at room temperature (r.t.). Solvent was evaporated under reduced pressure and azeotroped with MeOH 3 times. The residue was purified by silica-gel flash column chromatography (MeOH:DCM = 1:10 to 1:6 gradient elution) to provide the desired product (41.0 mmol, 91.6%). LRMS(ESI) *m/z* for C<sub>4</sub>H<sub>11</sub>O<sub>3</sub> [M + H]<sup>+</sup> calcd: 107.06, found: 107.10.

#### Synthesis of **S3a**, **S3b**, and **S4**, (S)-2-(2,2-dimethyl-1,3-dioxolan-4-yl)ethan-1-ol, (S)-(2,2-dimethyl-1,3-dioxan-4-yl)methanol, and (S)-4-(2-((4-methoxybenzyl)oxy)ethyl)-2,2-dimethyl-1,3-dioxolane

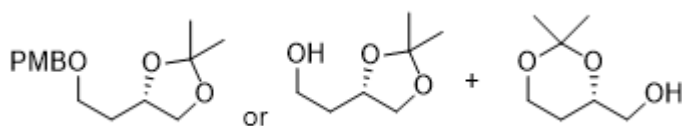

To a solution of **S2** (63.8 mmol) in acetone (300 mL) were added 2,2-dimethoxypropane (191.3 mmol), pyridinium-*p*-toluene sulfonate (5.10 mmol), then the reaction mixture was stirred at 70 °C (reflux) for overnight. After the completion of the reaction

monitored by TLC, solvent was evaporated under reduced pressure and the resultant was purified by silica-gel flash column chromatography (EtOAc:Hex = 1:2 to 1.5:1 gradient elution) to provide the inseparable mixture of 5-membered and 6-membered as 9:1 ratio (45.5 mmol, 71%).

To a solution of NaH (8.89 mmol) in dry THF (60 mL) under Ar(g) was added resulting inseparable mixture (**S3a** and **S3b**, 6.84 mmol) at 0 °C slowly and the reaction mixture was stirred for 30 min at r.t. *p*-Methoxybenzyl chloride (8.89 mmol), tetrabutylammonium iodide (0.889 mmol) were added to the reaction mixture, then the reaction mixture was stirred at 60 °C for overnight. After the completion of reaction monitored by TLC, the reaction mixture was diluted with EtOAc (100 mL) and washed with brine. Resulting organic layer was dried over anhydrous Na<sub>2</sub>SO<sub>4</sub>(s) and solvent was evaporated under reduced pressure. The residue was purified by silica-gel flash column chromatography (EtOAc:Hex = 1:15 to 1:5 gradient elution) to provide the desired product (1.55 g, 85%). <sup>1</sup>H NMR (300 MHz, CDCl<sub>3</sub>, reference peak TMS at 0.00 ppm) δ 7.25 (d, *J* = 8.1, Hz, 2H), 6.87 (d, *J* = 8.7, Hz, 2H), 4.43 (s, 2H), 4.20 (quin, *J* = 6.6 Hz, 1H), 4.05 (dd, *J* = 8.1, 6.0 Hz, 1H), 3.80 (s, 3H), 3.59–3.51 (m, 3H), 1.96–1.79 (m, 2H), 1.34 (s, 3H), 1.35 (s, 3H); <sup>13</sup>C NMR (75 MHz, CDCl<sub>3</sub>) δ 159.4, 130.6, 129.4, 114.0, 108.7, 74.1, 73.0, 70.0, 67.0, 55.5, 34.1, 27.1, 26.0; LRMS(ESI) *m/z* for C<sub>7</sub>H<sub>15</sub>O<sub>3</sub> [M + H]<sup>+</sup> calcd: 147.09, found: 147.10.

### Synthesis of **S5**, (S)-4-((4-methoxybenzyl)oxy)butane-1,2-diol

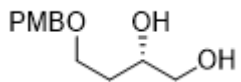  
To a solution of **S4** (14.1 mmol) in MeOH (100 mL) was added pyridinium-*p*-toluenesulfonate (1.41 mmol) and the reaction mixture was stirred at r.t. for 18 hr. Solvent was evaporated under reduced pressure and the residue was purified by silica-gel flash column chromatography (MeOH:DCM = 1:40 to 1:18 gradient elution) to provide the desired product (2.99 g, 93%). <sup>1</sup>H NMR (400 MHz, CDCl<sub>3</sub>, reference peak TMS at 0.00 ppm) δ 7.25 (d, *J* = 8.4 Hz, 2H), 6.88 (d, *J* = 8.4 Hz, 2H), 4.46 (s, 2H), 3.90 (m, 1H), 3.81 (s, 3H), 3.69–3.60 (m, 3H), 3.49 (dd, *J* = 11.4, 6.2 Hz, 1H), 1.87–1.78 (m, 1H), 1.75–1.68 (m, 1H); <sup>13</sup>C NMR (75 MHz, CDCl<sub>3</sub>) δ 159.5, 130.0, 129.6, 114.1, 73.2, 71.6, 68.2, 66.8, 55.5, 33.0, 14.4; LRMS(ESI) *m/z* for C<sub>12</sub>H<sub>18</sub>NaO<sub>4</sub> [M + Na]<sup>+</sup> calcd: 249.11, found: 249.05.

### Synthesis of **S6** and **S7**, (S)-2-hydroxy-4-((4-methoxybenzyl)oxy)butyl methanesulfonate and (S)-2-(2-((4-methoxybenzyl)oxy)ethyl)oxirane

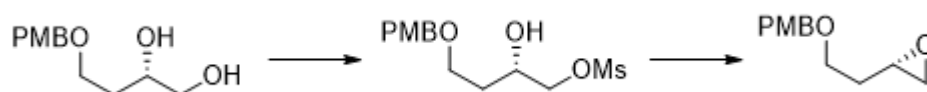

To a solution of **S5** (5.46 mmol) and collidine (54.6 mmol) in dry DCM (100 mL) was added methanesulfonyl chloride (6.56 mmol) dropwise over 1 hr under Ar(g) at 0 °C and the reaction mixture was stirred for 12 hr. Then, the reaction mixture was diluted with DCM (100 mL) and washed with brine. Organic layer was dried over anhydrous Na<sub>2</sub>SO<sub>4</sub>(s) and solvent was evaporated under reduced pressure. Then, to a solution of **S6** in dry diethylether (60 mL) was added tetrabutylammonium hydroxide (1M solution in MeOH, 7.10 mmol) under Ar(g) at 0 °C slowly. The reaction mixture was stirred at 0 °C for 6 hr. After the completion of the reaction monitored by TLC, the reaction mixture was diluted with EtOAc (100 mL) and washed with NH<sub>4</sub>Cl(aq.) and organic layer was dried over anhydrous Na<sub>2</sub>SO<sub>4</sub>(s) and solvent was evaporated under reduced pressure. The residue was purified by silica-gel flash column chromatography (EtOAc:Hex = 1:10 to 1:5 gradient elution) to provide the desired product (932 mg, 82% as 2 step yield). <sup>1</sup>H NMR (500 MHz, CDCl<sub>3</sub>, reference peak TMS at 0.00 ppm) δ 7.26 (d, *J* = 8.0 Hz, 2H), 6.88 (d, *J* = 8.5 Hz, 2H), 4.46 (s, 2H), 3.80 (s, 3H), 3.61–3.57 (m, 2H), 3.07–3.04 (m, 1H), 2.78 (t, *J* = 4.5 Hz, 1H), 2.52 (dd, *J* = 4.5, 3.0 Hz, 1H), 1.92–1.87 (m, 1H), 1.80–1.73 (m, 1H); <sup>13</sup>C NMR (125 MHz, CDCl<sub>3</sub>) δ 159.4, 129.5, 127.2, 114.0, 73.0, 66.9, 55.5, 50.3, 47.3, 33.2; LRMS(ESI) *m/z* for C<sub>12</sub>H<sub>16</sub>NaO<sub>3</sub> [M + Na]<sup>+</sup> calcd: 231.10, found: 231.00.

### Synthesis of **S9**, (3R)-1-((4-methoxybenzyl)oxy)-13-(((tetrahydro-2H-pyran-2-yl)oxy)tridec-5-yn-3-ol

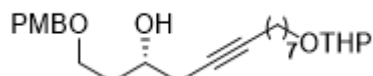

To a solution of **S8** (non-8-ynoxycyclohexane, 15.6 mmol) in dry THF was added *n*-butyllithium (17.6 mmol) under Ar(g) at -78 °C slowly and reaction mixture was stirred for 15 min at -78 °C. **S7** (13.5 mmol), boron trifluoride diethyl etherate (14.9 mmol) in dry THF were added to the reaction mixture at -78 °C slowly and the reaction mixture was stirred at ambient temperature. After the completion of the reaction monitored by TLC, the reaction mixture was diluted with EtOAc (100 mL) and washed with NH<sub>4</sub>Cl (aq.) and organic layer was dried over anhydrous Na<sub>2</sub>SO<sub>4</sub>(s). Solvent was evaporated under reduced pressure and the residue was purified by silica-gel flash column chromatography (EtOAc:Hex = 1:10 to 1:3 gradient elution) to provide the desired product (4.79 g, 82%). <sup>1</sup>H NMR (300 MHz, CDCl<sub>3</sub>, reference peak TMS at 0.00 ppm) δ 7.25 (d, *J* = 14.0 Hz, 2H), 6.87 (d, *J* = 14.5 Hz, 2H), 4.57 (t, *J* = 6.0 Hz, 1H), 4.45 (s, 2H), 3.87–3.82 (m, 1H), 3.80 (s, 4H), 3.76–3.60 (m, 3H), 3.53–3.48 (m, 1H), 3.41–3.34 (m, 1H), 2.98 (d, *J* = 6.0 Hz, 1H), 2.36–2.34 (m, 2H), 2.17–2.11 (m, 2H), 2.04–1.99 (m, 1H), 1.89–1.79 (m, 3H), 1.61–1.43 (m, 6H), 1.37–1.08 (m, 8H); LRMS(ESI) *m/z* for C<sub>26</sub>H<sub>40</sub>NaO<sub>5</sub> [M + Na]<sup>+</sup> calcd: 455.28, found: 455.20.

### Synthesis of **S10**, (3R,*Z*)-1-((4-methoxybenzyl)oxy)-13-(((tetrahydro-2H-pyran-2-yl)oxy)tridec-5-en-3-ol

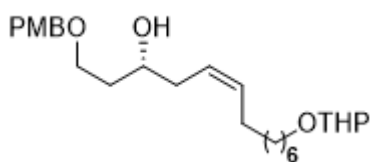

To a solution of **S9** (7.40 mmol) in EtOH/DCM (3:1, v/v) was added Lindlar catalyst (450 mg, 20 wt%) and the reaction mixture was stirred under H<sub>2</sub>(g) at r.t. for 8 hr. After the completion of the reaction monitored by TLC, the reaction mixture was filtered through celite and solvent was evaporated under reduced pressure to provide the desired product (3.14 g, 98%). <sup>1</sup>H NMR (400 MHz, CDCl<sub>3</sub>, reference peak TMS at 0.00 ppm) δ 7.25 (d, *J* = 8.4 Hz, 2H), 6.87 (d, *J* = 8.4 Hz, 2H), 5.54–5.44 (m, 1H), 5.41–5.36 (m, 1H), 4.57 (t, *J* = 4.4 Hz, 1H), 4.45 (s, 2H), 3.90–3.80 (m, 1H), 3.78 (s, 4H), 3.76–3.66 (m, 2H), 3.64–3.58 (m, 1H), 3.52–3.47 (m, 1H), 3.40–3.35 (m, 1H), 2.89 (t, *J* = 3.0 Hz, 1H), 2.30–2.15 (m, 2H), 2.05–1.97 (m, 1H), 1.86–1.78 (m, 1H), 1.77–1.66 (m, 3H), 1.62–1.49 (m, 6H), 1.38–1.26 (m, 8H); LRMS(ESI) *m/z* for C<sub>26</sub>H<sub>42</sub>NaO<sub>5</sub> [M + Na]<sup>+</sup> calcd: 457.29, found: 457.20.

### Synthesis of **S11**, 2-(((R,*Z*)-11-(benzyloxy)-13-(((4-methoxybenzyl)oxy)tridec-8-en-1-yl)oxy)tetrahydro-2H-pyran

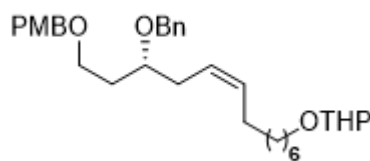

To a solution of NaH (5.06 mmol) in dry DMF (40 mL) was added **S10** (3.89 mmol) under Ar(g) slowly at 0 °C. After stirring at 0 °C for 1 hr, benzyl chloride (5.06 mmol), tetrabutylammonium iodide (1.01 mmol) were added to the reaction mixture. Then, the reaction mixture was stirred at 60 °C for overnight. After the completion of the reaction monitored by TLC, reaction was quenched by adding NH<sub>4</sub>Cl (aq.) (40 mL) at water bath. Organic layer was extracted with EtOAc (20 mL × 3) and dried over anhydrous Na<sub>2</sub>SO<sub>4</sub>(s) and solvent was evaporated under reduced pressure. The residue was purified by silica-gel flash column chromatography (EtOAc:Hex = 1:12 to 1:3 gradient elution) to provide the desired product (875 mg, 43%). <sup>1</sup>H NMR (400 MHz, CDCl<sub>3</sub>, reference peak TMS at 0.00 ppm) δ 7.34–7.23 (m, 7H), 6.86 (d, *J* = 8.4 Hz, 2H), 5.50–5.39 (m, 2H), 4.60–4.56 (m, 2H), 4.45–4.36 (m, 3H), 3.87 (dt, *J* = 7.6, 2.8 Hz, 1H), 3.79 (s, 3H), 3.73 (q, *J* = 6.8 Hz, 1H), 3.64–3.47 (m, 4H), 3.41–3.35 (m, 1H), 2.39–2.25 (m, 2H), 1.86–1.77 (m, 2H), 1.74–1.68 (m, 1H), 1.61–1.50 (m, 9H), 1.36–1.25 (m, 15H); LRMS(ESI) *m/z* for C<sub>33</sub>H<sub>48</sub>NaO<sub>5</sub> [M + Na]<sup>+</sup> calcd: 547.34, found: 547.30.



## Synthesis of **S12**, (R,Z)-1-(((3-(benzyloxy)-13-iodotridec-5-en-1-yl)oxy)methyl)-4-methoxybenzene

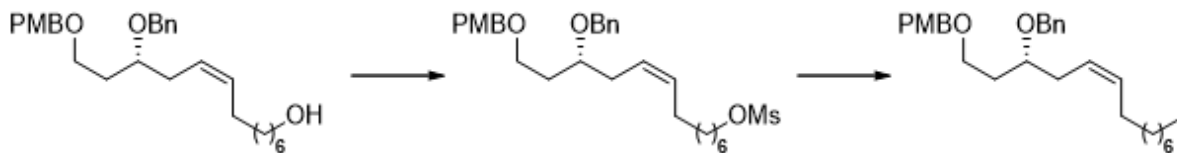

Pyridinium-*p*-toluenesulfonate (0.431 mmol) was added to a solution of **S11** (4.31 mmol) in MeOH (30 mL) and the reaction mixture was stirred at r.t. for overnight. After the completion of the reaction monitored by TLC, solvent was evaporated under reduced pressure. The residue was purified by silica-gel flash column chromatography (EtOAc:Hex = 1:5 to 1:2.5 gradient elution) to give the hydroxy product (1.90 g, quantitative). <sup>1</sup>H NMR (300 MHz, CDCl<sub>3</sub>, reference peak TMS at 0.00 ppm)  $\delta$  7.34–7.22 (m, 7H), 6.86 (d, *J* = 8.4 Hz, 2H), 5.56–5.38 (m, 2H), 4.58 (dd, *J* = 11.7, 3.3 Hz, 1H), 4.49–4.44 (m, 1H), 4.41–4.35 (m, 2H), 3.79 (s, 3H), 3.64–3.51 (m, 5H), 2.35–2.24 (m, 2H), 2.04–1.96 (m, 2H), 1.84–1.77 (m, 2H), 1.58–1.50 (m, 2H), 1.37–1.23 (m, 10H); LRMS(ESI) *m/z* for C<sub>28</sub>H<sub>41</sub>O<sub>4</sub> [M + H]<sup>+</sup> calcd: 441.29, found: 441.25.

**OH-S11** (4.31 mmol) and methanesulfonyl chloride (6.46 mmol) were dissolved in dry THF under Ar(g), then dry triethylamine (8.61 mmol) was added to the reaction mixture. After stirring at r.t. for 4 hr, solvent was evaporated under reduced pressure and the residue was purified by silica-gel flash column chromatography (EtOAc:Hex = 1:5 to 1:2.5 gradient elution) to give mesylated product (2.21 g, 99%). <sup>1</sup>H NMR (400 MHz, CDCl<sub>3</sub>, reference peak TMS at 0.00 ppm)  $\delta$  7.34–7.23 (m, 7H), 6.86 (d, *J* = 8.4 Hz, 2H), 5.49–5.38 (m, 2H), 4.54 (ddd, *J* = 28.0, 11.2, 4.0 Hz, 1H), 4.45–4.36 (m, 3H), 4.20 (t, *J* = 6.4 Hz, 2H), 3.79 (s, 3H), 3.64–3.50 (m, 3H), 2.98 (s, 3H), 2.37–2.26 (m, 2H), 2.04–2.96 (m, 2H), 1.85–1.77 (m, 2H), 1.76–1.69 (m, 2H), 1.41–1.25 (m, 10H); LRMS(ESI) *m/z* for C<sub>29</sub>H<sub>43</sub>O<sub>6</sub>S [M + H]<sup>+</sup> calcd: 519.27, found: 519.20.

**O-mesylated S11** (4.24 mmol), sodium iodide (3.86 g) and sodium carbonate (41.6 mg) were dissolved in acetone and the reaction mixture was stirred at reflux. After the completion of the reaction monitored by TLC, the reaction mixture was condensed under reduced pressure and the residue was purified by silica-gel flash column chromatography (EtOAc:Hex = 1:20 to 1:7 gradient elution) to give iodinated product (2.19 g, 94%). <sup>1</sup>H NMR (400 MHz, CDCl<sub>3</sub>, reference peak TMS at 0.00 ppm)  $\delta$  7.34–7.12 (m, 7H), 6.86 (d, *J* = 8.4 Hz, 2H), 5.49–5.38 (m, 2H), 4.54 (ddd, *J* = 28.0, 12.0, 4.4 Hz, 1H), 4.45–4.39 (m, 3H), 3.79 (s, 3H), 3.64–3.50 (m, 3H), 3.17 (quin, *J* = 4.6 Hz, 2H), 2.38–2.25 (m, 2H), 2.04–1.96 (m, 2H), 1.85–1.74 (m, 4H), 1.39–1.23 (m, 8H); LRMS(ESI) *m/z* for C<sub>28</sub>H<sub>40</sub>I<sub>2</sub>O<sub>3</sub> [M + H]<sup>+</sup> calcd: 573.18, found: 573.10.

## General procedure of the Cu<sup>(I)</sup>-mediated sp<sup>3</sup>-sp<sup>3</sup> cross coupling

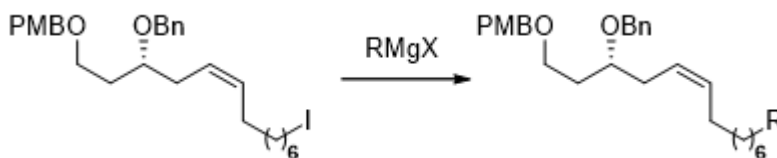

To a solution of **S12** (1.0 equiv.) in dry THF (0.1 M for **S12**) were added alkylmagnesium halide (4.0 equiv.) and dilithium tetrachlorocuprate (0.4 equiv.) successively at 0 °C. The reaction mixture was stirred at 0 °C for overnight. After the completion of the reaction monitored by TLC, the reaction was quenched by adding NH<sub>4</sub>Cl(aq.) and organic layer was extracted with EtOAc (30 mL × 3) and dried over anhydrous Na<sub>2</sub>SO<sub>4</sub>(s). The resultant was condensed under reduced pressure and the residue was purified by silica-gel flash column chromatography (EtOAc:Hex = 1:25 to 1:12 gradient elution) to provide the desired product.

**Synthesis of S13{n15}**, (R,Z)-1-(((3-(benzyloxy)pentadec-5-en-1-yl)oxy)methyl)-4-methoxybenzene

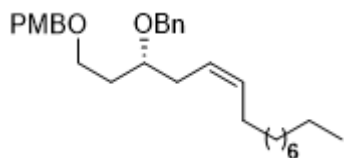

Yield: 79%; <sup>1</sup>H NMR (400 MHz, CDCl<sub>3</sub>, reference peak TMS at 0.00 ppm) δ 7.34–7.23 (m, 7H), 6.86 (d, *J* = 8.8 Hz, 2H), 5.51–5.39 (m, 2H), 4.59 (d, *J* = 11.2 Hz, 1H), 4.45–4.36 (m, 3H), 3.79 (s, 3H), 3.66–3.50 (m, 3H), 2.38–2.27 (m, 2H), 2.02 (q, *J* = 6.4 Hz, 2H), 1.86–1.78 (m, 2H), 1.32–1.26 (m, 12H), 0.88 (t, *J* = 6.0 Hz, 3H); <sup>13</sup>C NMR (100 MHz, CDCl<sub>3</sub>) δ 159.3, 139.1, 132.4, 130.9, 129.5, 128.5, 128.0, 127.7, 125.2, 113.9, 76.3, 72.8, 71.5, 71.4, 66.9, 55.5, 34.7, 32.1, 32.1, 29.8, 29.8, 29.6, 29.5, 29.4, 27.7, 22.9, 14.3; LRMS(ESI) *m/z* for C<sub>30</sub>H<sub>44</sub>NaO<sub>3</sub> [M + Na]<sup>+</sup> calcd: 475.32, found: 475.25.

**Synthesis of S13{n16}**, (R,Z)-1-(((3-(benzyloxy)hexadec-5-en-1-yl)oxy)methyl)-4-methoxybenzene

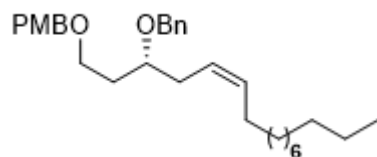

Yield: 48%; <sup>1</sup>H NMR (300 MHz, CDCl<sub>3</sub>, reference peak TMS at 0.00 ppm) δ 7.35–7.21 (m, 7H), 6.86 (d, *J* = 8.7 Hz, 2H), 5.52–5.37 (m, 2H), 4.59 (d, *J* = 11.4 Hz, 1H), 4.45–4.35 (m, 3H), 3.79 (s, 3H), 3.67–3.51 (m, 3H), 2.38–2.24 (m, 2H), 2.02 (q, *J* = 6.6 Hz, 2H), 1.85–1.76 (m, 2H), 1.26 (m, 14H), 0.88 (t, *J* = 6.6 Hz, 3H); <sup>13</sup>C NMR (75 MHz, CDCl<sub>3</sub>) δ 159.1, 138.9, 132.2, 130.7, 129.3, 128.3, 127.8, 127.5, 125.0, 113.8, 76.1, 72.6, 71.3, 66.7, 55.3, 34.5, 31.9, 31.9, 29.7, 29.6, 29.4, 29.3, 27.5, 22.7, 14.1; LRMS(ESI) *m/z* for C<sub>31</sub>H<sub>46</sub>NaO<sub>3</sub> [M + Na]<sup>+</sup> calcd: 489.33, found: 489.30.

**Synthesis of S13{n17}**, (R,Z)-1-(((3-(benzyloxy)heptadec-5-en-1-yl)oxy)methyl)-4-methoxybenzene

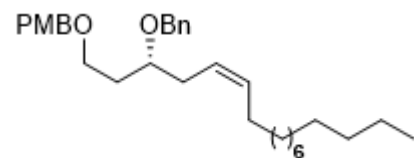

Yield: 68%; <sup>1</sup>H NMR (400 MHz, CDCl<sub>3</sub>, reference peak TMS at 0.00 ppm) δ 7.33–7.22 (m, 7H), 6.86 (d, *J* = 8.8 Hz, 2H), 5.50–5.38 (m, 2H), 4.59 (d, *J* = 4.0 Hz, 1H), 4.44–4.36 (m, 3H), 3.78 (s, 3H), 3.65–3.50 (m, 3H), 2.39–2.26 (m, 2H), 2.01 (q, *J* = 6.4 Hz, 2H), 1.81 (quint, *J* = 6.4 Hz, 2H), 1.26 (bs, 18H), 0.88 (t, *J* = 6.8 Hz, 3H); <sup>13</sup>C NMR (100 MHz, CDCl<sub>3</sub>) δ 159.3, 139.1, 132.4, 130.9, 129.5, 128.5, 128.0, 127.7, 125.2, 114.0, 76.3, 72.8, 71.5, 66.9, 55.4, 34.7, 32.1, 32.1, 29.9, 29.9, 29.8, 29.6, 29.6, 27.7, 22.9, 14.3; LRMS(ESI) *m/z* for C<sub>32</sub>H<sub>49</sub>O<sub>3</sub> [M + H]<sup>+</sup> calcd: 503.35, found: 503.25.

**Synthesis of S13{i17}**, (R,Z)-1-(((3-(benzyloxy)-15-methylhexadec-5-en-1-yl)oxy)methyl)-4-methoxybenzene

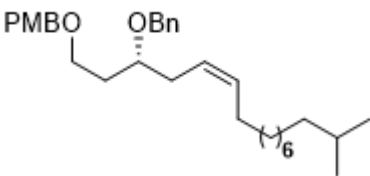

Yield: 92%; <sup>1</sup>H NMR (400 MHz, CDCl<sub>3</sub>, reference peak TMS at 0.00 ppm) δ 7.33–7.23 (m, 7H), 6.86 (d, *J* = 8.8 Hz, 2H), 5.51–5.39 (m, 2H), 4.58 (d, *J* = 11.6 Hz, 1H), 4.44–4.36 (m, 3H), 3.79 (s, 3H), 3.66–3.50 (m, 3H), 2.39–2.25 (m, 2H), 2.02 (q, *J* = 6.8 Hz, 2H), 1.81 (quin, *J* = 6.6 Hz, 2H), 1.51 (sep, *J* = 6.6 Hz, 1H), 1.33–1.26 (m, 12H), 1.17–1.12 (m, 2H), 0.86 (d, *J* = 6.4 Hz, 6H); LRMS(ESI) *m/z* for C<sub>32</sub>H<sub>49</sub>O<sub>3</sub> [M + H]<sup>+</sup> calcd: 503.35, found: 503.25.

**Synthesis of S13{a17}**, 1-(((3(R,Z)-3-(benzyloxy)-14-methylhexadec-5-en-1-yl)oxy)methyl)-4-methoxybenzene

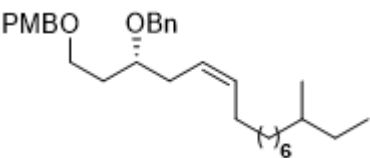

Yield: 99%; <sup>1</sup>H NMR (500 MHz, CDCl<sub>3</sub>, reference peak TMS at 0.00 ppm) δ 7.34–7.22 (m, 7H), 6.87 (d, *J* = 8.5 Hz, 2H), 5.49–5.39 (m, 2H), 4.58 (d, *J* = 17.0 Hz, 1H), 4.44–4.37 (m, 3H), 3.79 (s, 3H), 3.64–3.60 (m, 1H), 3.60–3.51 (m, 2H), 2.37–2.27 (m, 2H), 2.02 (q, *J* = 7.0 Hz, 2H), 1.84–1.78 (m, 2H), 1.35–1.23 (m, 14H), 1.16–1.08 (m, 1H), 0.87–0.83 (m, 6H); <sup>13</sup>C NMR (75 MHz, CDCl<sub>3</sub>) δ 159.3, 139.1,

132.4, 130.9, 129.5, 128.5, 128.0, 127.7, 125.2, 114.0, 76.3, 72.8, 71.5, 66.9, 55.5, 36.9, 34.7, 34.6, 32.1, 30.2, 29.9, 29.8, 29.7, 29.6, 27.7, 27.3, 19.4, 11.6; LRMS(ESI)  $m/z$  for  $C_{32}H_{49}O_3$   $[M + H]^+$  calcd: 503.35, found: 503.25.

### General procedure of PMB deprotection

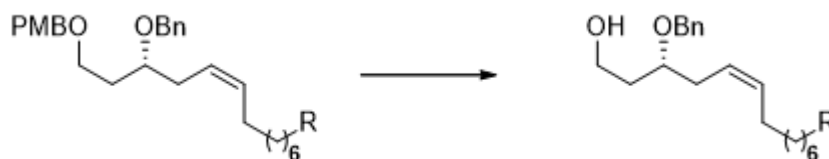

**S13** was dissolved in TFA/DCM (1:20, v/v, 0.1 M for **S13**) at 0 °C and the reaction mixture was stirred for 4 hr. After the completion of reaction monitored by TLC, reaction mixture was diluted with EtOAc and washed with  $NaHCO_3(aq.)$ . Organic layer was dried over anhydrous  $Na_2SO_4(s)$  and condensed under reduced pressure. The residue was and purified by silica-gel flash column chromatography (EtOAc:Hex = 1:10 to 1:5 gradient elution) to provide the desired product.

### Synthesis of OH-S13{n15}, (R,Z)-3-(benzyloxy)pentadec-5-en-1-ol

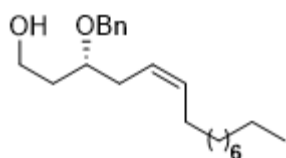

Yield: 59%;  $^1H$  NMR (300 MHz,  $CDCl_3$ , reference peak TMS at 0.00 ppm)  $\delta$  7.38–7.27 (m, 5H), 5.54–5.46 (m, 1H), 5.42–5.34 (m, 1H), 4.68 (d,  $J = 11.4$  Hz, 1H), 4.49 (d,  $J = 11.4$  Hz, 1H), 3.34–3.64 (m, 3H), 2.50–2.28 (m, 3H), 2.07–1.99 (m, 2H), 1.84–1.76 (m, 1H), 1.27 (bs, 14H), 0.88 (t,  $J = 6.6$  Hz, 3H);  $^{13}C$  NMR (75 MHz,  $CDCl_3$ )  $\delta$  138.5, 132.8, 128.7, 128.1, 127.9, 124.7, 78.7, 71.3, 61.2, 36.3, 32.1, 31.5, 29.8, 29.8, 29.6, 29.6, 27.7, 22.9, 14.3; LRMS(ESI)  $m/z$  for  $C_{22}H_{37}O_2$   $[M + H]^+$  calcd: 332.27, found: 333.20.

### Synthesis of OH-S13{n16}, (R,Z)-3-(benzyloxy)hexadec-5-en-1-ol

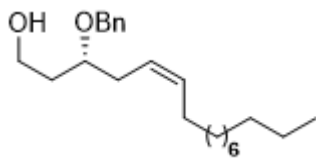

Yield: 77%  $^1H$  NMR (400 MHz,  $CDCl_3$ , reference peak TMS at 0.00 ppm)  $\delta$  7.34–7.25 (m, 5H), 5.53–5.47(m, 1H), 5.41–5.35(m, 1H), 4.67 (d,  $J = 11.2$  Hz, 1H), 4.49 (d,  $J = 11.2$  Hz, 1H), 3.78–3.67 (m, 3H), 2.48–2.42 (m, 1H), 2.36–2.28 (m, 2H), 2.06–1.99 (m, 2H), 1.83–1.72 (m, 2H), 1.26 (bs, 16H), 0.88 (t,  $J = 6.2$  Hz, 3H);  $^{13}C$  NMR (100 MHz,  $CDCl_3$ )  $\delta$  138.5, 132.8, 128.7, 128.1, 128.0, 124.7, 78.7, 71.3, 61.2, 36.3, 32.1, 31.5, 29.9, 29.8, 29.8, 29.6, 29.6, 27.7, 22.9, 14.3; LRMS(ESI)  $m/z$  for  $C_{23}H_{39}O_2$   $[M + H]^+$  calcd: 347.29, found: 347.25.

### Synthesis of OH-S13{n17}, (R,Z)-3-(benzyloxy)heptadec-5-en-1-ol

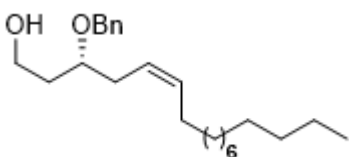

Yield: 74%;  $^1H$  NMR (300 MHz,  $CDCl_3$ , reference peak TMS at 0.00 ppm)  $\delta$  7.35–7.28 (m, 5H), 5.54–5.46 (m, 1H), 5.42–5.34 (m, 1H), 4.68 (d,  $J = 11.4$  Hz, 1H), 4.49 (d,  $J = 11.4$  Hz, 1H), 3.76–3.64 (m, 3H), 2.50–2.27 (m, 3H), 2.04 (q,  $J = 6.6$  Hz, 2H), 1.81–1.73 (m, 2H), 1.26 (bs, 18H), 0.88 (t,  $J = 6.6$  Hz, 3H);  $^{13}C$  NMR (75 MHz,  $CDCl_3$ )  $\delta$  138.5, 132.8, 128.7, 128.1, 128.0, 124.7, 78.7, 71.3, 61.1, 36.3, 32.1, 31.5, 29.9, 29.9, 29.8, 29.8, 29.6, 29.4, 27.7, 22.9, 14.3; LRMS(ESI)  $m/z$  for  $C_{24}H_{41}O_2$   $[M + H]^+$  calcd: 361.30, found: 361.25.

### Synthesis of OH-S13{i17}, (R,Z)-3-(benzyloxy)-15-methylhexadec-5-en-1-ol

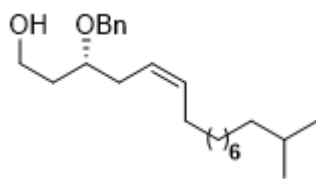

Yield: 78%;  $^1\text{H NMR}$  (300 MHz,  $\text{CDCl}_3$ , reference peak TMS at 0.00 ppm)  $\delta$  7.33–7.26 (m, 5H), 5.57–5.49 (m, 1H), 5.43–5.34 (m, 1H), 4.60 (q,  $J$  = 10.8 Hz, 2H), 3.97–3.87 (m, 1H), 2.58 (d,  $J$  = 5.1 Hz, 2H), 2.48–2.29 (m, 2H), 2.05–1.97 (m, 2H), 1.51 (sep,  $J$  = 6.6 Hz, 1H), 1.26 (m, 12H), 1.17–1.12 (m, 2H), 0.86 (d,  $J$  = 6.6 Hz);  $^{13}\text{C NMR}$  (75 MHz,  $\text{CDCl}_3$ )  $\delta$  177.2, 138.1, 133.4, 128.4, 127.8, 127.7, 123.8, 75.6, 71.7, 39.1, 31.7, 30.0, 29.7, 29.6, 29.4, 29.3, 28.0, 27.5, 27.4, 22.7; LRMS(ESI)  $m/z$  for  $\text{C}_{24}\text{H}_{41}\text{O}_2$  [ $\text{M} + \text{H}$ ] $^+$

calcd: 361.30, found: 361.25.

### Synthesis of OH-S13{a17}, (3R,Z)-3-(benzyloxy)-14-methylhexadec-5-en-1-ol

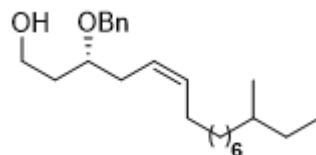

Yield: 84%;  $^1\text{H NMR}$  (300 MHz,  $\text{CDCl}_3$ , reference peak TMS at 0.00 ppm)  $\delta$  7.33–7.26 (m, 5H), 5.57–5.49 (m, 1H), 5.42–5.34 (m, 1H), 4.60 (q,  $J$  = 11.7 Hz, 2H), 3.93 (quint,  $J$  = 6.0 Hz, 1H), 2.59 (d,  $J$  = 5.7 Hz, 2H), 2.54–2.29 (m, 2H), 2.02 (q,  $J$  = 6.9 Hz, 2H), 1.27 (bs, 13H), 1.16–1.07 (m, 2H), 0.85 (t,  $J$  = 6.9 Hz, 6H);  $^{13}\text{C NMR}$  (75 MHz,  $\text{CDCl}_3$ )  $\delta$  176.6, 138.2, 133.6, 128.6, 128.0, 128.0, 123.9, 75.8, 71.9, 39.4, 36.9, 34.6, 31.8, 30.2, 29.8, 29.8, 29.7, 29.6, 27.7, 27.3, 19.4, 11.6; LRMS(ESI)  $m/z$  for  $\text{C}_{24}\text{H}_{41}\text{O}_2$  [ $\text{M} + \text{H}$ ] $^+$  calcd: 361.30, found: 361.25.

### General procedure of oxidation

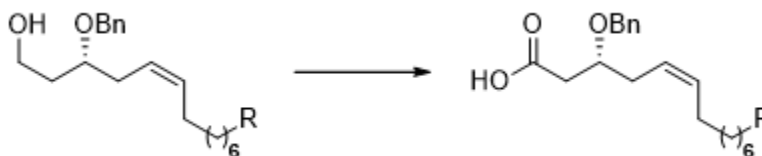

To a solution of **OH-S13** (1.0 equiv.) in acetone (0.1 M for **OH-S13**) was added Jones reagent (2.0 equiv.) at 0 °C, then the reaction mixture was stirred for 2.5 hr. After the completion of the reaction monitored by TLC, the reaction mixture was diluted with EtOAc (2 mL) and washed with 1N HCl (3 mL). Organic layer was dried over anhydrous  $\text{Na}_2\text{SO}_4(\text{s})$  and condensed under reduced pressure. The residue was purified by silica-gel flash column chromatography (EtOAc:Hex = 1:8 to 1:5 gradient elution with 0.5% AcOH) to provide the desired product.

### Synthesis of S14{n15}, (R,Z)-3-(benzyloxy)pentadec-5-enoic acid

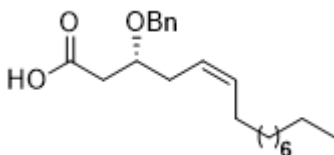

Yield: 76%;  $^1\text{H NMR}$  (400 MHz,  $\text{CDCl}_3$ , reference peak TMS at 0.00 ppm)  $\delta$  7.33–7.26 (m, 5H), 5.56–5.49 (m, 1H), 5.41–5.35 (m, 1H), 4.60 (q,  $J$  = 11.8 Hz, 2H), 3.93 (quint,  $J$  = 6.0 Hz, 1H), 2.60–2.57 (m, 2H), 2.46–2.38 (m, 1H), 2.35–2.31 (m, 1H), 2.02 (q,  $J$  = 7.2 Hz, 2H), 1.26 (bs, 14H), 0.88 (t,  $J$  = 7.2 Hz, 3H);  $^{13}\text{C NMR}$  (100 MHz,  $\text{CDCl}_3$ )  $\delta$  177.3, 138.3, 133.6, 128.6, 128.0, 127.9, 124.0, 75.8, 71.9, 39.5, 32.1, 31.8, 29.8, 29.8, 29.5, 27.7, 22.9, 14.3.

**Synthesis of S14{n16}**, (R,Z)-3-(benzyloxy)hexadec-5-enoic acid

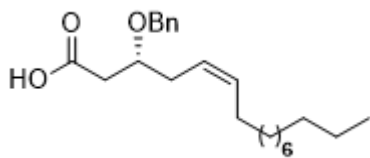

Yield: 61%;  $^1\text{H NMR}$  (300 MHz,  $\text{CDCl}_3$ , reference peak TMS at 0.00 ppm)  $\delta$  7.33–7.28 (m, 5H), 5.57–5.49 (m, 1H), 5.42–5.34 (m, 1H), 4.60 (q,  $J = 11.4$  Hz, 2H), 3.93 (quint,  $J = 6.0$  Hz, 1H), 2.58 (d,  $J = 5.1$  Hz, 2H), 2.49–2.29 (m, 2H), 2.02 (q,  $J = 6.6$  Hz, 2H), 1.26 (bs, 16H), 0.88 (t,  $J = 6.6$  Hz, 3H);  $^{13}\text{C NMR}$  (75 MHz,  $\text{CDCl}_3$ )  $\delta$  177.0, 138.3, 133.6, 128.6, 128.0, 127.9, 124.0, 75.8, 71.9, 39.5, 32.1, 31.9, 29.9, 29.8, 29.6, 27.7, 22.9, 14.3.

**Synthesis of S14{n17}**, (R,Z)-3-(benzyloxy)heptadec-5-enoic acid

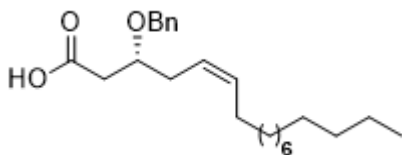

Yield: 76%;  $^1\text{H NMR}$  (300 MHz,  $\text{CDCl}_3$ , reference peak TMS at 0.00 ppm)  $\delta$  7.33–7.25 (m, 5H), 5.57–5.49 (m, 1H), 5.42–5.34 (m, 1H), 4.60 (q,  $J = 10.8$  Hz, 2H), 3.93 (quint,  $J = 6.0$  Hz, 1H), 2.58 (dd,  $J = 6.3, 2.4$  Hz, 2H), 2.46–2.29 (m, 2H), 2.02 (q,  $J = 6.9$  Hz, 2H), 1.26 (bs, 18H), 0.89 (t,  $J = 6.9$  Hz, 3H);  $^{13}\text{C NMR}$  (75 MHz,  $\text{CDCl}_3$ )  $\delta$  177.3, 138.3, 133.6, 128.6, 128.0, 127.9, 124.0, 75.8, 71.9, 39.5, 32.1, 31.9, 29.9, 29.9, 29.8, 29.6, 27.7, 22.9, 14.3; LRMS(ESI)  $m/z$  for  $\text{C}_{24}\text{H}_{37}\text{O}_3$   $[\text{M} - \text{H}]^-$  calcd: 373.28, found: 373.10.

**Synthesis of S14{i17}**, (R,Z)-3-(benzyloxy)-15-methylhexadec-5-enoic acid

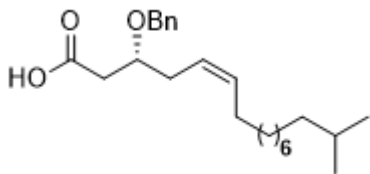

Yield: 96%;  $^1\text{H NMR}$  (300 MHz,  $\text{CDCl}_3$ , reference peak TMS at 0.00 ppm)  $\delta$  7.33–7.26 (m, 5H), 5.57–5.49 (m, 1H), 5.43–5.34 (m, 1H), 4.60 (q,  $J = 10.8$  Hz, 2H), 3.97–3.87 (m, 1H), 2.58 (d,  $J = 5.1$  Hz, 2H), 2.48–2.29 (m, 2H), 2.05–1.97 (m, 2H), 1.51 (sep,  $J = 6.6$  Hz, 1H), 1.26 (m, 12H), 1.17–1.12 (m, 2H), 0.86 (d,  $J = 6.6$  Hz);  $^{13}\text{C NMR}$  (75 MHz,  $\text{CDCl}_3$ )  $\delta$  177.2, 138.1, 133.4, 128.4, 127.8, 127.7, 123.8, 75.6, 71.7, 39.1, 31.7, 30.0, 29.7, 29.6, 29.4, 29.3, 28.0, 27.5, 27.4, 22.7; LRMS(ESI)  $m/z$  for  $\text{C}_{24}\text{H}_{37}\text{O}_3$   $[\text{M} - \text{H}]^-$  calcd: 373.28, found: 373.10.

**Synthesis of S14{a17}**, (3R,Z)-3-(benzyloxy)-14-methylhexadec-5-enoic acid

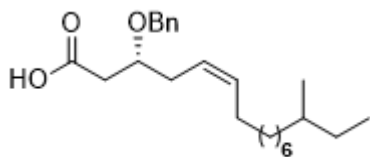

Yield: 75%;  $^1\text{H NMR}$  (300 MHz,  $\text{CDCl}_3$ , reference peak TMS at 0.00 ppm)  $\delta$  7.33–7.26 (m, 5H), 5.57–5.49 (m, 1H), 5.42–5.34 (m, 1H), 4.60 (q,  $J = 11.7$  Hz, 2H), 3.93 (quint,  $J = 6.0$  Hz, 1H), 2.59 (d,  $J = 5.7$  Hz, 2H), 2.54–2.29 (m, 2H), 2.02 (q,  $J = 6.9$  Hz, 2H), 1.27 (bs, 13H), 1.16–1.07 (m, 2H), 0.85 (t,  $J = 6.9$  Hz, 6H);  $^{13}\text{C NMR}$  (75 MHz,  $\text{CDCl}_3$ )  $\delta$  176.6, 138.2, 133.6, 128.6, 128.0, 128.0, 123.9, 75.8, 71.9, 39.4, 36.9, 34.6, 31.8, 30.2, 29.8, 29.8, 29.7, 29.6, 27.7, 27.3, 19.4, 11.6; LRMS(ESI)  $m/z$  for  $\text{C}_{24}\text{H}_{37}\text{O}_3$   $[\text{M} - \text{H}]^-$  calcd: 373.28, found: 373.10.

## B. Synthesis of $\alpha$ -galactosylsphingoid building blocks

In the case of sphinganine building blocks,  $\alpha$ -galactosylsphinganine having iodide (**S22**) was prepared from Garner aldehyde. In a similar manner as acyl building blocks, sphingoid building blocks (**S23**{*i*17}–**S23**{*n*18}) were generated by decoration of terminal structures via  $sp^3$ – $sp^3$  cross-coupling.

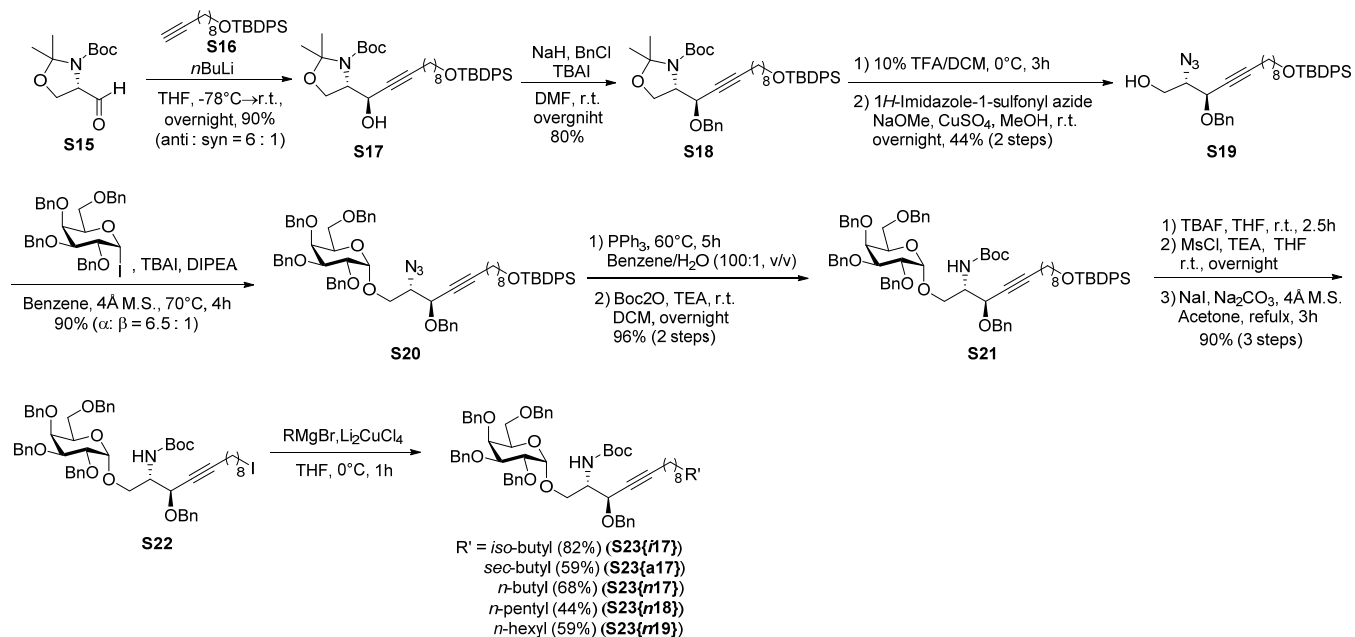

### Synthesis of **S16**, *tert*-butyl(dec-9-yn-1-yloxy)diphenylsilane

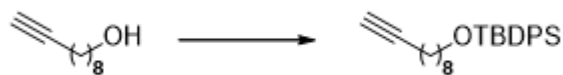

To a solution of 9-decyne-1-ol (25.9 mmol) in dry DCM (150 mL) were added *tert*-butyl(chloro)diphenylsilane (33.7 mmol) and 1,8-diazabicyclo[5.4.0]undec-7-ene (33.7 mmol) under Ar(g) at 0 °C.

After being stirred for 1 hr at 0 °C, the reaction was warmed up to ambient temperature and stirred for 4 hr. After the completion of the reaction monitored by TLC, the reaction mixture was diluted with EtOAc (100 mL) and washed with brine. Organic layer was dried over anhydrous Na<sub>2</sub>SO<sub>4</sub> (s) and condensed under reduced pressure. The residue was purified by silica-gel flash column chromatography (EtOAc:Hex = 1:80 to 1:40 gradient elution) to provide the desired product (9.78g, 96%). <sup>1</sup>H NMR (500 MHz, CDCl<sub>3</sub>, reference peak TMS at 0.00 ppm)  $\delta$  7.68–7.66 (m, 4H), 7.44–7.36 (m, 6H), 3.65 (t, *J* = 7.0 Hz, 2H), 2.18 (td, *J* = 7.0, 2.5 Hz, 2H), 1.94 (t, *J* = 2.5 Hz, 1H), 1.58–1.49 (m, 4H), 1.39–1.31 (m, 4H), 1.28–1.26 (m, 4H), 1.05 (s, 9H); <sup>13</sup>C NMR (125 MHz, CDCl<sub>3</sub>)  $\delta$  135.8, 134.4, 129.7, 127.8, 85.0, 68.3, 64.2, 32.8, 29.4, 29.3, 28.9, 28.7, 27.1, 25.9, 19.4, 18.6; LRMS(ESI) *m/z* for C<sub>26</sub>H<sub>37</sub>OSi [M + H]<sup>+</sup> calcd: 393.25, found: 393.20.

### Synthesis of **S17**, *tert*-butyl (S)-4-((R)-11-((*tert*-butyldiphenylsilyl)oxy)-1-hydroxyundec-2-yn-1-yl)-2,2-dimethylloxazolidine-3-carboxylate

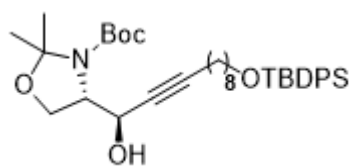

To a solution of **S16** (10.7 mmol) in dry THF (80 mL) was added *n*-butyllithium (12.9 mmol) slowly under Ar(g) at -78 °C and the reaction mixture was stirred for 45 min at -78 °C. Garner's aldehyde (11.8 mmol) in dry THF (20 mL) was added to reaction mixture dropwise at -78 °C. The reaction mixture was stirred at ambient temperature for overnight. After the completion of the reaction monitored by TLC, the reaction was quenched by adding NH<sub>4</sub>Cl(aq.) (50 mL) and organic layer was extracted with

EtOAc (50 mL × 3). Organic layer was dried over anhydrous Na<sub>2</sub>SO<sub>4</sub> (s) and condensed under reduced pressure. The residue purified by silica-gel flash column chromatography (EtOAc:Hex = 1:10 to 1:5 gradient elution) to provide the desired product (5.65g, 85%). <sup>1</sup>H NMR (400 MHz, CDCl<sub>3</sub>, reference peak CDCl<sub>3</sub> at 7.26 ppm) δ 7.68–7.66 (m, 4H), 7.44–7.35 (m, 6H), 4.74 (d, *J* = 7.6 Hz, 1H), 4.51 (d, *J* = 7.6 Hz, 1H), 4.13–4.06 (m, 2H), 3.90 (bs, 1H), 3.65 (t, *J* = 6.4 Hz, 2H), 2.19 (td, *J* = 7.2, 1.6 Hz, 2H), 1.58–1.45 (m, 20H), 1.38–1.31 (m, 4H), 1.28–1.24 (m, 4H), 1.05 (s, 9H); <sup>13</sup>C NMR (100 MHz, CDCl<sub>3</sub>) δ 135.8, 135.8, 134.4, 129.7, 127.8, 95.2, 64.2, 32.8, 29.5, 29.3, 29.1, 28.8, 28.6, 27.1, 26.0, 19.4, 19.0; LRMS(ESI) *m/z* for C<sub>37</sub>H<sub>55</sub>NaNO<sub>5</sub>Si [M + Na]<sup>+</sup> calcd: 644.37, found: 644.30.

**Synthesis of S18**, *tert*-butyl (S)-4-((R)-1-(benzyloxy)-11-((*tert*-butyldiphenylsilyl)oxy)undec-2-yn-1-yl)-2,2-dimethylazolidine-3-carboxylate

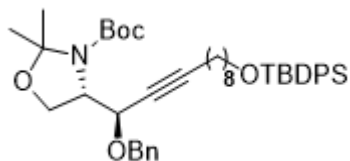

Sodium hydride (13.0 mmol) was dissolved in dry DMF (50 mL) under Ar(g) at 0 °C. **S17** in dry DMF (10 mL) was added to the reaction mixture slowly and the reaction mixture was stirred at 0 °C for 30 min. Tetrabutylammonium iodide (1.30 mmol) and benzyl chloride (13.0 mmol) were added to the reaction mixture and the reaction mixture was stirred at r.t. for overnight. After the completion of the reaction monitored by TLC, the reaction was quenched by adding NH<sub>4</sub>Cl(aq.) (50 mL) at 0 °C and organic layer was extracted with EtOAc (40 mL × 3). The resultant was dried over anhydrous Na<sub>2</sub>SO<sub>4</sub>(s) and condensed under reduced pressure. The residue purified by silica-gel flash column chromatography (EtOAc:Hex = 1:20 to 1:15 gradient elution) to provide the desired product (5.73g, 81%). <sup>1</sup>H NMR (300 MHz, CDCl<sub>3</sub>, reference peak CDCl<sub>3</sub> at 7.26 ppm) δ 7.68–7.66 (m, 4H), 7.42–7.32 (m, 11H), 4.82 (dd, *J* = 12.3, 5.1 Hz, 1H), 4.54 (d, *J* = 72 Hz, 1H), 4.52 (dd, *J* = 12.3, 5.1 Hz, 1H), 4.30–4.25 (m, 1H), 4.03 (d, *J* = 40.5 Hz, 1H), 4.01 (t, *J* = 7.8 Hz, 1H), 3.65 (t, *J* = 6.6 Hz, 2H), 2.24–2.17 (m, 2H), 1.62–1.47 (m, 15H), 1.36–1.26 (m, 12H), 1.05 (s, 9H); LRMS(ESI) *m/z* for C<sub>44</sub>H<sub>61</sub>NNaO<sub>5</sub>Si [M + Na]<sup>+</sup> calcd: 734.42, found: 734.50.

**Synthesis of S19**, (2S,3R)-2-azido-3-(benzyloxy)-13-((*tert*-butyldiphenylsilyl)oxy)tridec-4-yn-1-ol

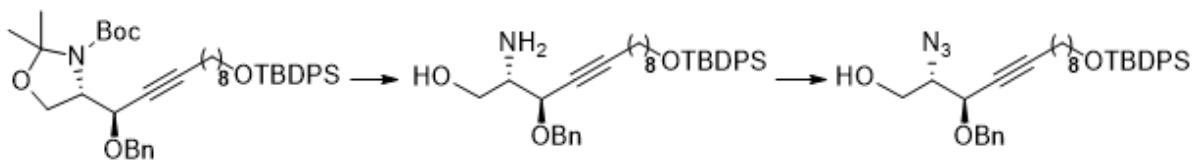

**S18** (3.62 mmol) was dissolved in HCl (4 M in dioxane)/THF (9 mL/9 mL) under Ar(g) and the reaction mixture was stirred at 0 °C. After the completion of the reaction monitored by TLC, the reaction mixture was poured to sat. NaHCO<sub>3</sub> (aq.) (40 mL) and organic layer was extracted with EtOAc (40 mL × 3). The organic layer was dried over anhydrous Na<sub>2</sub>SO<sub>4</sub>(s) and condensed under reduced pressure. The resultant, 4-(dimethylamino)pyridine (5.43 mmol) and imidazole-1-sulfonylazide<sup>1</sup> (7.25 mmol) were dissolved in MeOH (40 mL) and the reaction mixture was stirred at r.t. for overnight. After the completion of reaction monitored by TLC, the reaction mixture was diluted with DCM (50 mL) and washed with sat. NH<sub>4</sub>Cl(aq.). The resulting organic layer was dried with anhydrous Na<sub>2</sub>SO<sub>4</sub>(s) and condensed under reduced pressure. The residue was purified by silica-gel flash column chromatography (EtOAc:Hex = 1:12 to 1:5 gradient elution) to provide the desired product (2.18g, 47%). <sup>1</sup>H NMR (400 MHz, CDCl<sub>3</sub>, reference peak TMS at 0.00 ppm) δ 7.68–7.66 (m, 4H), 7.43–7.27 (m, 11H), 4.84 (d, *J* = 12.0 Hz, 1H), 4.52 (d, *J* = 12.0 Hz, 1H), 4.28–4.26 (m, 1H), 3.82 (bs, 2H), 3.65 (t, *J* = 6.4 Hz, 2H), 3.60 (q, *J* = 5.2 Hz, 1H), 2.27 (td, *J* = 7.2, 1.6 Hz, 2H), 2.05 (bs, 1H), 1.58–1.51 (m, 4H), 1.41–1.32 (m, 4H), 1.29–1.26 (m, 4H), 1.05 (s, 9H); <sup>13</sup>C NMR (100 MHz, CDCl<sub>3</sub>) δ 137.1, 135.6, 134.1, 129.5, 128.5, 128.0, 128.0, 127.6, 89.8, 75.3, 70.7, 69.8, 65.6, 64.0, 62.3, 32.5, 29.2, 29.1, 28.8, 28.4, 26.9, 25.7, 19.2, 18.8; LRMS(ESI) *m/z* for C<sub>36</sub>H<sub>48</sub>N<sub>3</sub>O<sub>3</sub>Si [M + H]<sup>+</sup> calcd: 598.34, found: 598.20.

**Synthesis of S20**, (((11R,12S)-12-azido-11-(benzyloxy)-13-(((2S,3R,4S,5S,6R)-3,4,5-tris(benzyloxy)-6-((benzyloxy)methyl)tetrahydro-2H-pyran-2-yl)oxy)tridec-9-yn-1-yl)oxy)(*tert*-butyl)diphenylsilane

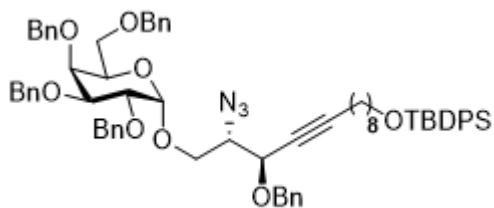

To a solution of 1-O-acetyl-2,3,4,6-tetra-O-benzyl-D-galactopyranoside (6.14 mmol) in dry DCM (50 mL) at 0 °C was added trimethylsilyl iodide (TMSI, 7.37 mmol). After being stirred for 30 min at 0 °C, the reaction was stopped by adding anhydrous toluene (30 mL) and residual TMSI was removed by azeotropic evaporation with anhydrous toluene 3 times. The resultant (slight yellow) was dissolved in anhydrous benzene (15 mL) and kept under Ar(g). In a separate round-bottom flask, molecular sieve (4 Å, 1 g), tetrabutylammonium iodide (TBAI, 22.1 mmol), **S19** (2.46 mmol) and diisopropylethylamine (7.37 mmol) were added into dry benzene (55 mL). The reaction mixture was stirred under Ar(g) at 65 °C for 10 min. As the complete dissolution of TBAI, the galactosyl iodide in dry benzene was added into this flask and the reaction mixture was stirred at 65 °C for 2 hr. After the completion of reaction monitored by TLC, the reaction mixture was poured into cold sat. NaHCO<sub>3</sub>(aq.). Organic layer was extracted with EtOAc (50 mL × 3) and dried over anhydrous Na<sub>2</sub>SO<sub>4</sub>(s). The resulting mixture was condensed under reduced pressure and purified by silica-gel column chromatography (EtOAc:Hex = 1:20 to 1:3 gradient elution) to provide the desired product (1.49g, 54%). <sup>1</sup>H NMR (400 MHz, CDCl<sub>3</sub>, reference peak TMS at 0.00 ppm) δ 7.66 (dd, *J* = 7.6, 1.6 Hz, 4H), 7.41–7.23 (m, 26H), 4.93 (d, *J* = 11.2 Hz, 1H), 4.87 (d, *J* = 3.6 Hz, 1H), 4.83–4.75 (m, 3H), 4.73–4.65 (m, 2H), 4.56 (d, *J* = 12 Hz, 1H), 4.48–4.42 (m, 2H), 4.40–4.36 (m, 1H), 4.31–4.30 (m, 1H), 4.04 (dd, *J* = 10.0, 3.6 Hz, 1H), 3.98–3.86 (m, 4H), 3.80–3.76 (m, 1H), 3.67–3.62 (m, 3H), 3.53–3.50 (m, 2H), 2.21 (td, *J* = 7.2, 1.6 Hz, 2H), 1.53 (septet, *J* = 7.2 Hz, 4H), 1.42–1.21 (m, 8H), 1.04 (s, 9H); <sup>13</sup>C NMR (100 MHz, CDCl<sub>3</sub>) δ 139.0, 138.8, 138.2, 137.7, 135.8, 134.4, 129.7, 128.6, 128.5, 128.5, 128.4, 128.0, 128.0, 127.9, 127.9, 127.9, 127.8, 127.7, 127.7, 127.7, 127.6, 98.8, 89.7, 79.0, 76.6, 75.2, 75.2, 75.0, 73.7, 73.4, 70.8, 69.9, 69.4, 69.1, 67.6, 64.2, 64.1, 32.8, 29.9, 29.5, 29.3, 29.1, 28.8, 27.1, 26.0, 19.4, 19.0; LRMS(ESI) *m/z* for C<sub>70</sub>H<sub>82</sub>N<sub>3</sub>O<sub>8</sub>Si [M + H]<sup>+</sup> calcd: 1120.58, found: 1120.30.

**Synthesis of S21**, *tert*-butyl ((2S,3R)-3-(benzyloxy)-13-(((*tert*-butyldiphenylsilyloxy)-1-(((2S,3R,4S,5S,6R)-3,4,5-tris(benzyloxy)-6-((benzyloxy)methyl)tetrahydro-2H-pyran-2-yl)oxy)tridec-4-yn-2-yl)carbamate

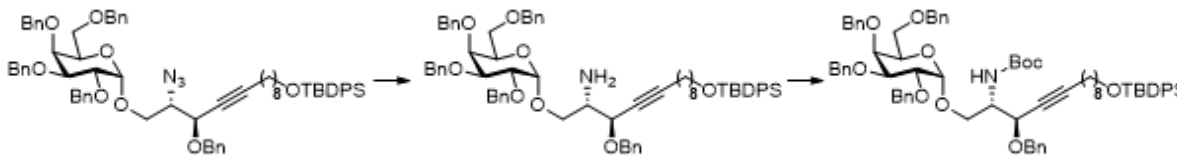

To a solution of **S20** (1.33 mmol) in benzene/H<sub>2</sub>O (10 mL/0.1 mL) was added triphenylphosphine (2.67 mmol) and the reaction mixture was stirred at 60 °C for 3 hr. After the completion of reaction monitored by TLC, solvent was evaporated under reduced pressure and residual H<sub>2</sub>O was removed by azeotropic evaporation with toluene three times. The resulting mixture was dissolved in DCM (10 mL) then di-*tert*-butyl dicarbonate (2.67 mmol), triethylamine (4.69 mmol) were added to the reaction mixture. After being stirred at r.t. for overnight, solvent was evaporated under reduced pressure and the residue was purified by silica-gel column chromatography (EtOAc:Hex = 1:10 to 1:5 gradient elution) to provide the desired product (1.28g, 80%). <sup>1</sup>H NMR (300 MHz, CDCl<sub>3</sub>, reference peak TMS at 0.00 ppm) δ 7.81–7.65 (m, 4H), 7.40–7.22 (m, 31H), 5.07 (d, *J* = 9.3 Hz, 1H), 4.92 (d, *J* = 11.4 Hz, 1H), 4.85 (d, *J* = 3.0 Hz, 1H), 4.80 (d, *J* = 11.7 Hz, 1H), 4.76–4.68 (m, 3H), 4.64–4.50 (m, 3H), 4.46–4.35 (m, 3H), 4.15–4.07 (m, 1H), 4.00 (dd, *J* = 9.9, 3.6 Hz, 1H), 3.92–3.83 (m, 3H), 3.76 (d, *J* = 5.1 Hz, 1=2H), 3.64 (t, *J* = 6.6 Hz, 2H), 3.48 (d, *J* = 6.6 Hz, 2H), 2.16 (td, *J* = 6.9, 1.5 Hz, 2H), 1.56–1.50 (m, 4H), 1.42 (s, 9H), 1.34–1.24 (m, 8H), 1.04 (s, 9H); <sup>13</sup>C NMR (75 MHz, CDCl<sub>3</sub>) δ 155.7, 139.1, 138.9, 138.8, 138.2, 138.1, 135.8, 134.4, 129.7, 128.6, 128.6, 128.5, 128.5, 128.4, 128.1, 128.1, 128.0, 127.9, 127.8, 127.8, 127.7, 127.6, 98.7, 88.7, 79.4, 79.1, 75.2, 75.0, 73.7, 73.3, 70.7, 69.7, 69.2, 69.0, 67.9, 64.2, 53.9, 32.8, 29.5, 29.3, 29.2, 28.9, 28.6, 27.1, 26.0, 19.4, 19.0; LRMS(ESI) *m/z* for C<sub>75</sub>H<sub>91</sub>NaNO<sub>10</sub>Si [M + Na]<sup>+</sup> calcd: 1216.63, found: 1216.45.



**Synthesis of OH-S21**, *tert*-butyl ((2S,3R)-3-(benzyloxy)-13-hydroxy-1-(((2S,3R,4S,5S,6R)-3,4,5-tris(benzyloxy)-6-(benzyloxy)methyl)tetrahydro-2H-pyran-2-yl)oxy)tridec-4-yn-2-yl)carbamate

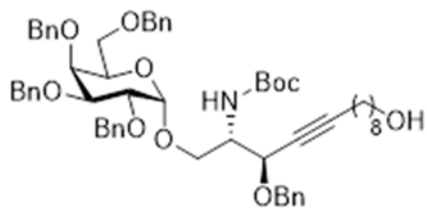

To a solution of **S20** (0.228 mmol) at r.t. in THF (2 mL) was added TBAF (1 M in THF, 0.274 mL), then stirred at r.t. for 2.5 hr. When the reaction was completed checked by TLC, the reaction mixture was concentrated *in vacuo*. The residue was purified by silica-gel flash column chromatography (20% EA in hexane gradient to 33.33%) to obtain the desired product (0.218g, quantitative). <sup>1</sup>H NMR (300 MHz, CDCl<sub>3</sub>, reference peak TMS at 0.00 ppm) δ

7.39–7.20 (m, 25H), 5.25 (d, *J* = 9.3 Hz, 1H), 4.93–4.89 (m, 1H), 4.86 (d, *J* = 3.0 Hz, 1H), 4.80 (m, 1H), 4.78–4.68 (m, 3H), 4.68–4.63 (m, 1H), 4.59–4.34 (m, 5H), 4.12–4.07 (m, 1H), 4.03–3.76 (m, 6H), 3.58 (t, *J* = 6.3 Hz, 2H), 3.49 (d, *J* = 6.6 Hz, 2H), 2.19–2.15 (m, 2H), 1.53–1.25 (m, 21H); <sup>13</sup>C NMR (75 MHz, CDCl<sub>3</sub>) δ 155.8, 139.0, 138.8, 138.7, 138.2, 138.1, 128.5, 128.5, 128.4, 128.4, 128.2, 128.1, 128.0, 127.8, 127.7, 127.7, 127.6, 127.6, 98.6, 88.5, 79.3, 79.1, 76.8, 75.1, 74.9, 73.6, 73.3, 73.2, 70.6, 69.6, 69.1, 68.9, 67.8, 63.0, 53.9, 32.8, 29.2, 28.9, 28.7, 28.6, 25.7, 18.8.

**Synthesis of O-mesylated S21**, (11R,12S)-11-(benzyloxy)-12-((*tert*-butoxycarbonyl)amino)-13-(((2S,3R,4S,5S,6R)-3,4,5-tris(benzyloxy)-6-(benzyloxy)methyl)tetrahydro-2H-pyran-2-yl)oxy)tridec-9-yn-1-yl methanesulfonate

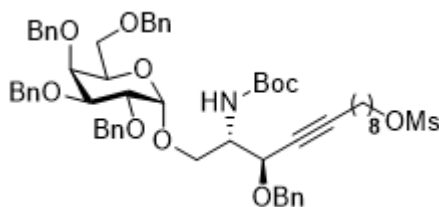

To a solution of **OH-S21** (1.24 mmol) in THF were added methanesulfonyl chloride (1.87 mmol) and triethylamine (2.49 mL) and the reaction mixture was stirred at r.t. for 3 hr. After the completion of the reaction monitored by TLC, solvent was evaporated under reduced pressure. The residue was purified by silica-gel column chromatography (EtOAc:Hex = 1:5 to 1:2 gradient elution) to provide the desired product (1.28g, 99%). <sup>1</sup>H NMR (300 MHz, CDCl<sub>3</sub>, reference peak TMS at 0.00 ppm) δ

7.39–7.21 (m, 25H), 5.08 (d, *J* = 9.0 Hz, 1H), 4.92 (d, *J* = 11.4 Hz, 1H), 4.85 (d, *J* = 3.0 Hz, 1H), 4.81 (d, *J* = 11.7 Hz, 1H), 4.76–4.69 (m, 3H), 4.64 (s, 1H), 4.58 (d, *J* = 12.6 Hz, 1H), 4.51 (d, *J* = 5.7 Hz, 1H), 4.43 (dd, *J* = 15.6, 3.3 Hz, 2H), 4.35 (quint, *J* = 2.4 Hz, 1H), 4.18 (t, *J* = 6.6 Hz, 2H), 4.13–4.09 (m, 1H), 4.00 (dd, *J* = 9.9, 3.6 Hz, 1H), 3.921 (bs, 1H), 3.87–3.83 (m, 2H), 3.77 (d, *J* = 5.1 Hz, 2H), 3.48 (d, *J* = 6.3 Hz, 2H), 2.97 (s, 3H), 2.17 (td, *J* = 6.9, 1.8 Hz, 2H), 1.72 (quint, *J* = 6.9 Hz, 2H), 1.52–1.46 (m, 2H), 1.42 (s, 9H), 1.40–1.21 (m, 8H); <sup>13</sup>C NMR (75 MHz, CDCl<sub>3</sub>) δ 155.7, 139.1, 138.9, 138.8, 138.2, 138.1, 128.6, 128.5, 128.5, 128.5, 128.4, 128.1, 128.0, 127.9, 127.7, 127.7, 127.6, 98.8, 86.6, 79.4, 79.1, 76.8, 75.2, 75.0, 73.7, 73.3, 70.7, 70.3, 69.7, 69.2, 69.0, 67.9, 53.9, 37.5, 29.3, 29.1, 29.0, 28.8, 28.6, 25.6, 18.9; LRMS(ESI) *m/z* for C<sub>60</sub>H<sub>75</sub>NaNO<sub>12</sub>S [M + Na]<sup>+</sup> calcd: 1056.49, found: 1056.30.

**Synthesis of S22**, *tert*-butyl ((2S,3R)-3-(benzyloxy)-13-iodo-1-(((2S,3R,4S,5S,6R)-3,4,5-tris(benzyloxy)-6-(benzyloxy)methyl)tetrahydro-2H-pyran-2-yl)oxy)tridec-4-yn-2-yl)carbamate

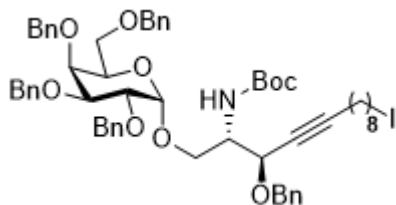

To a solution of **O-mesylated S21** (1.23 mmol) in acetone were added sodium iodide (6.17 mmol) and sodium carbonate (0.25 mmol), then the reaction mixture was stirred at 65 °C for 3 hr. After the completion of reaction monitored by TLC, solvent was evaporated under reduced pressure. The residue was purified by silica-gel column chromatography (EtOAc:Hex = 1:10 to 1:5 gradient elution) to provide the desired product (1.26g, 96%). <sup>1</sup>H NMR (300 MHz, CDCl<sub>3</sub>, reference peak TMS at 0.00 ppm) δ

7.39–7.21 (m, 25H), 5.07 (d, *J* = 9.3 Hz, 1H), 4.92 (d, *J* = 11.4 Hz, 1H), 4.85 (d, *J* = 3.0 Hz, 1H), 4.81 (d, *J* = 11.7 Hz, 1H), 4.76–4.69 (m, 3H), 4.66 (s, 1H), 4.58 (d, *J* = 11.7 Hz, 1H), 4.51 (d, *J* = 6.3 Hz, 1H), 4.46–4.40 (m, 2H), 4.37–4.36 (m, 1H), 4.12 (q, *J* = 7.2 Hz, 1H), 4.01 (dd, *J* = 10.2, 3.6 Hz, 1H), 3.92 (bs, 1H), 3.90–3.83 (m, 2H), 3.77 (d, *J* = 5.1 Hz, 2H), 3.48 (d, *J* = 6.6 Hz, 2H), 3.15 (t, *J* = 6.9 Hz, 2H), 2.17 (t, *J* = 6.9 Hz, 2H), 1.79 (quint, *J* = 7.2 Hz, 2H), 1.58–1.26 (m, 19H); <sup>13</sup>C NMR (75 MHz, CDCl<sub>3</sub>) δ 155.7, 139.1, 138.9, 138.8, 138.2, 138.1, 128.6, 128.6, 128.5, 128.5, 128.4, 128.1, 128.0, 127.9, 127.8, 127.7, 127.6, 98.8,

88.6, 79.4, 79.1, 75.2, 75.0, 73.7, 73.3, 70.7, 69.7, 69.2, 69.0, 67.9, 53.9, 33.7, 30.7, 29.1, 29.0, 28.8, 28.6, 18.9, 7.5; LRMS(ESI)  $m/z$  for  $C_{59}H_{72}INaNO_9$  [ $M + Na$ ] $^+$  calcd: 1088.41, found: 1088.30.

### General procedure of the $Cu^{(I)}$ -mediated $sp^3-sp^3$ cross coupling

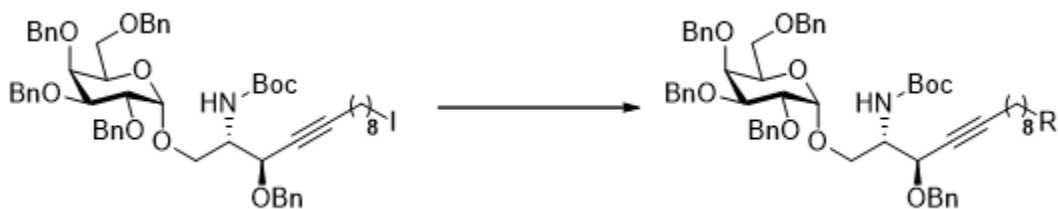

To a solution of **S22** (1.0 equiv.) in dry THF (0.1 M for **S22**) under Ar(g) were added alkylmagnesium halide (4.0 equiv.) and dilithium tetrachlorocuprate (0.4 equiv.) successively at 0 °C. The reaction mixture was stirred for 1.5 hr at 0 °C. After the completion of reaction monitored by TLC, the reaction was quenched by adding sat.  $NaHCO_3$  (aq.) and organic layer was extracted with EtOAc three times and dried over anhydrous  $Na_2SO_4$ (s). Resulting mixture was condensed under reduced pressure and purified by silica-gel flash column chromatography (EtOAc:Hex = 1:10 to 1:6 gradient elution) to provide the desired product.

**Synthesis of S23{a17}**, *tert*-butyl ((2S,3R)-3-(benzyloxy)-14-methyl-1-(((2S,3R,4S,5S,6R)-3,4,5-tris(benzyloxy)-6-((benzyloxy)methyl)tetrahydro-2H-pyran-2-yl)oxy)hexadec-4-yn-2-yl)carbamate

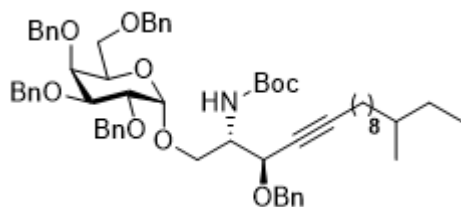

Yield: 59%;  $^1H$  NMR (300 MHz,  $CDCl_3$ , reference peak TMS at 0.00 ppm)  $\delta$  7.38–7.25 (m, 25H), 5.07 (d,  $J = 9.0$  Hz, 1H), 4.92 (d,  $J = 11.4$  Hz, 1H), 4.85 (d,  $J = 2.7$  Hz, 1H), 4.80 (d,  $J = 11.7$  Hz, 1H), 4.76–4.68 (m, 3H), 4.64 (s, 1H), 4.58 (d,  $J = 11.7$  Hz, 1H), 4.51 (d,  $J = 6.3$  Hz, 1H), 4.46 (s, 1H), 4.39 (dd,  $J = 12.6, 5.4$  Hz, 2H), 4.14–3.90 (m, 1H), 4.00 (dd,  $J = 9.9, 3.6$  Hz, 1H), 3.92 (bs, 1H), 3.90–3.83 (m, 2H), 3.76 (d,  $J = 4.8$  Hz, 2H), 3.49 (d,  $J = 6.6$  Hz, 2H), 2.17 (td,  $J = 6.9$  Hz, 1.5 Hz, 2H), 1.48–1.42 (m, 11H), 1.36–1.23 (m, 13H), 1.16–1.06 (m, 2H), 0.85 (t,  $J = 7.2$  Hz, 6H);  $^{13}C$  NMR

(75 MHz,  $CDCl_3$ )  $\delta$  155.7, 139.1, 138.9, 138.8, 138.2, 138.1, 128.6, 128.5, 128.5, 128.5, 128.4, 128.3, 128.1, 128.1, 128.0, 127.9, 127.7, 127.6, 98.7, 88.8, 79.4, 79.1, 75.2, 75.0, 73.7, 73.3, 70.7, 69.7, 69.2, 69.0, 67.9, 53.9, 36.9, 34.6, 30.2, 29.8, 29.7, 29.4, 28.9, 28.6, 27.3, 19.4, 19.0, 11.6; LRMS(ESI)  $m/z$  for  $C_{63}H_{81}NaNO_9$  [ $M + Na$ ] $^+$  calcd: 1018.58, found: 1018.35.

**Synthesis of S23{n17}**, *tert*-butyl ((2S,3R)-3-(benzyloxy)-1-(((2S,3R,4S,5S,6R)-3,4,5-tris(benzyloxy)-6-((benzyloxy)methyl)tetrahydro-2H-pyran-2-yl)oxy)heptadec-4-yn-2-yl)carbamate

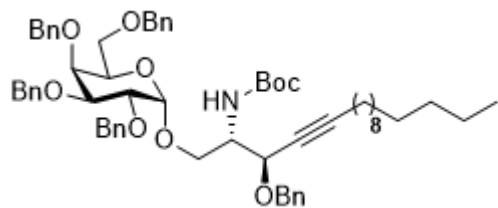

Yield: 68%;  $^1H$  NMR (300 MHz,  $CDCl_3$ , reference peak TMS at 0.00 ppm)  $\delta$  7.39–7.22 (m, 25H), 5.07 (d,  $J = 8.7$  Hz, 1H), 4.92 (d,  $J = 11.4$  Hz, 1H), 4.85 (d,  $J = 3.0$  Hz, 1H), 4.81 (d,  $J = 11.7$  Hz, 1H), 4.76–4.69 (m, 3H), 4.64 (s, 1H), 4.59 (d,  $J = 5.7$  Hz, 1H), 4.51 (d,  $J = 6.3$  Hz, 1H), 4.64 (s, 1H), 4.42–4.36 (m, 2H), 4.16–4.09 (m, 1H), 4.01 (dd,  $J = 9.9, 3.6$  Hz, 1H), 3.92 (bs, 1H), 3.90–3.83 (m, 2H), 3.76 (d,  $J = 5.1$  Hz, 2H), 3.48 (d,  $J = 6.3$  Hz, 2H), 2.16 (td,  $J = 7.2, 1.8$  Hz, 2H), 1.51–1.42 (m, 11H), 1.36–1.25

(m, 18H), 0.88 (t,  $J = 6.9$  Hz, 3H);  $^{13}C$  NMR (75 MHz,  $CDCl_3$ )  $\delta$  155.7, 139.1, 138.9, 138.8, 138.2, 138.1, 128.6, 128.6, 128.5, 128.5, 128.4, 128.4, 128.1, 128.1, 128.0, 127.9, 127.8, 127.7, 127.6, 98.7, 88.8, 79.4, 79.1, 75.2, 75.0, 73.7, 73.3, 70.7, 69.6, 69.1, 69.0, 67.9, 53.9, 32.1, 29.9, 29.8, 29.7, 29.6, 29.3, 29.2, 28.6, 28.0, 22.9, 18.9, 14.3; LRMS(ESI)  $m/z$  for  $C_{63}H_{81}NaNO_9$  [ $M + Na$ ] $^+$  calcd: 1018.58, found: 1018.35.

**Synthesis of S23{n18}**, *tert*-butyl ((2S,3R)-3-(benzyloxy)-1-(((2S,3R,4S,5S,6R)-3,4,5-tris(benzyloxy)-6-(benzyloxy)methyl)tetrahydro-2H-pyran-2-yl)oxy)octadec-4-yn-2-yl)carbamate

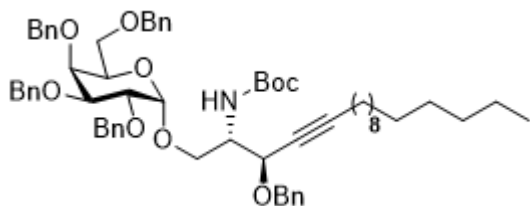

Yield: 44%; <sup>1</sup>H NMR (300 MHz, CDCl<sub>3</sub>, reference peak TMS at 0.00 ppm) δ 7.39–7.22 (m, 25H), 5.07 (d, *J* = 8.7 Hz, 1H), 4.92 (d, *J* = 11.4 Hz, 1H), 4.85 (d, *J* = 3.0 Hz, 1H), 4.81 (d, *J* = 11.7 Hz, 1H), 4.76–4.69 (m, 3H), 4.64 (s, 1H), 4.59 (d, *J* = 5.7 Hz, 1H), 4.51 (d, *J* = 6.3 Hz, 1H), 4.64 (s, 1H), 4.42–4.36 (m, 2H), 4.16–4.09 (m, 1H), 4.01 (dd, *J* = 9.9, 3.6 Hz, 1H), 3.92 (bs, 1H), 3.90–3.83 (m, 2H), 3.76 (d, *J* = 5.1 Hz, 2H), 3.48 (d, *J* = 6.3 Hz, 2H), 2.16 (td, *J* = 7.2, 1.8 Hz,

2H), 1.51–1.42 (m, 11H), 1.36–1.25 (m, 20H), 0.88 (t, *J* = 6.9 Hz, 3H); <sup>13</sup>C NMR (75 MHz, CDCl<sub>3</sub>) δ 155.7, 139.1, 138.9, 138.8, 138.2, 138.1, 128.6, 128.6, 128.5, 128.5, 128.4, 128.4, 128.1, 128.1, 128.0, 127.9, 127.8, 127.7, 127.6, 98.7, 88.8, 79.4, 79.1, 75.2, 75.0, 73.7, 73.3, 70.7, 69.6, 69.1, 69.0, 67.9, 53.9, 32.1, 29.9, 29.8, 29.6, 29.4, 29.2, 28.9, 28.6, 22.9, 19.0, 14.4; LRMS(ESI) *m/z* for C<sub>64</sub>H<sub>83</sub>NaNO<sub>9</sub> [M + Na]<sup>+</sup> calcd: 1032.60, found: 1032.40.

**Synthesis of S23{n19}**, *tert*-butyl ((2S,3R)-3-(benzyloxy)-1-(((2S,3R,4S,5S,6R)-3,4,5-tris(benzyloxy)-6-(benzyloxy)methyl)tetrahydro-2H-pyran-2-yl)oxy)nonadec-4-yn-2-yl)carbamate

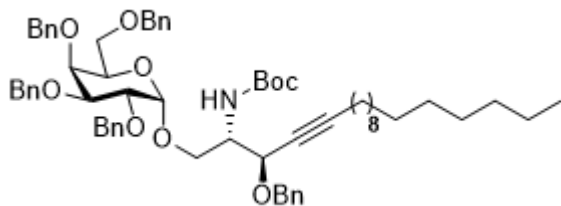

Yield: 59%; <sup>1</sup>H NMR (300 MHz, CDCl<sub>3</sub>, reference peak TMS at 0.00 ppm) δ 7.38–7.25 (m, 25H), 5.07 (d, *J* = 9.0 Hz, 1H), 4.92 (d, *J* = 11.1 Hz, 1H), 4.85 (d, *J* = 2.7 Hz, 1H), 4.81 (d, *J* = 11.7 Hz, 1H), 4.76–4.69 (m, 3H), 4.64 (s, 1H), 4.58 (d, *J* = 11.7 Hz, 1H), 4.51 (d, *J* = 6.0 Hz, 1H), 4.46 (s, 1H), 4.42–4.36 (m, 2H), 4.13–4.09 (m, 1H), 4.01 (dd, *J* = 10.2, 3.6 Hz, 1H), 3.92 (bs, 1H), 3.90–3.83 (m, 2H), 3.76 (d, *J* = 4.8 Hz, 2H), 3.49 (d, *J* = 6.6 Hz, 2H),

2.16 (td, *J* = 6.9, 1.5 Hz, 2H), 1.51–1.46 (m, 2H), 1.42 (s, 9H), 1.37–1.25 (m, 22H), 0.88 (t, *J* = 6.3 Hz, 3H); <sup>13</sup>C NMR (100 MHz, CDCl<sub>3</sub>) δ 155.7, 139.1, 138.9, 138.8, 138.2, 138.1, 128.6, 128.5, 128.5, 128.5, 128.4, 128.1, 128.1, 128.0, 127.9, 127.7, 127.7, 127.6, 98.7, 88.8, 79.4, 79.1, 76.8, 75.9, 75.2, 75.0, 73.7, 73.3, 70.7, 69.7, 69.1, 69.0, 67.9, 53.9, 32.1, 29.9, 29.9, 29.8, 29.6, 29.4, 29.2, 28.9, 28.6, 22.9, 19.0, 14.3; LRMS(ESI) *m/z* for C<sub>65</sub>H<sub>85</sub>NaNO<sub>9</sub> [M + Na]<sup>+</sup> calcd: 1046.61, found: 1046.40.

## C. Construction of $\alpha$ -GalCer library

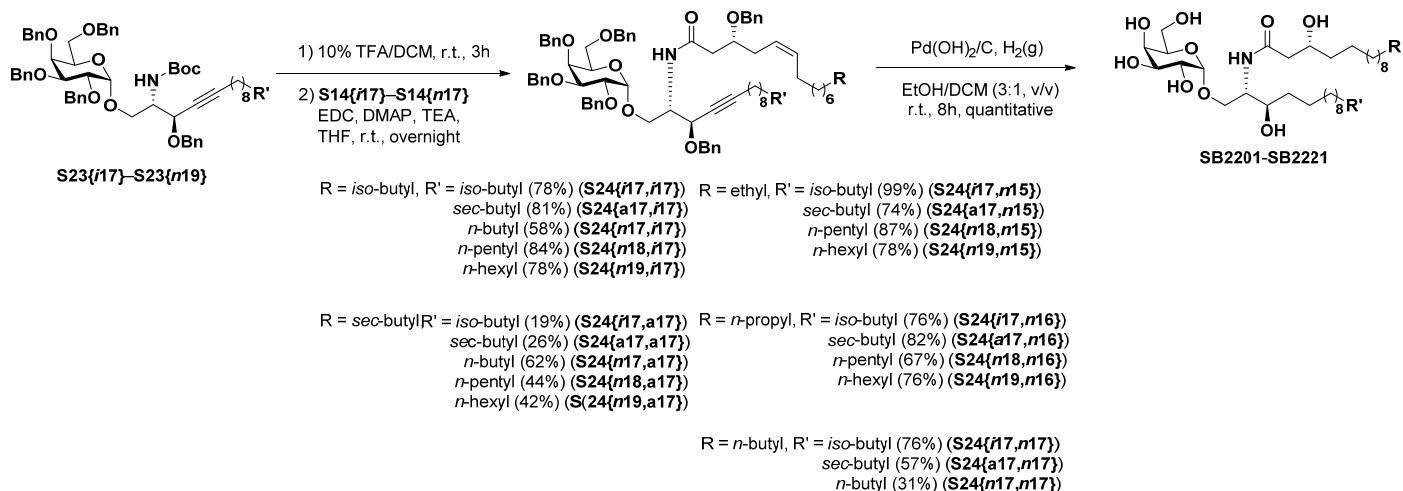

## General procedure of Boc deprotection and amide coupling

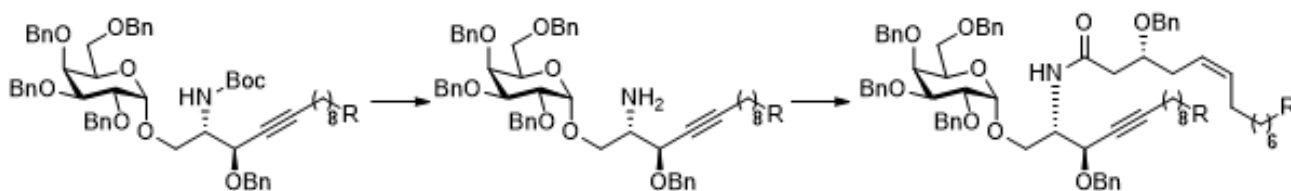

**S23** (1.0 equiv.) was dissolved in TFA/DCM (0.2 mL/2 mL) and the reaction mixture was stirred at r.t. for 3 hr. After the completion of reaction monitored by TLC, the reaction was quenched by adding sat.  $\text{NaHCO}_3(\text{aq.})$  and organic layer was extracted with EtOAc (10 mL  $\times$  3) and dried over anhydrous  $\text{Na}_2\text{SO}_4(\text{s})$ . The resulting mixture, **S14** (1.0 equiv.), *N*-3-dimethylaminopropyl-*N*'-ethylcarbodiimide hydrochloride (2.5 equiv.) and 4-(dimethylamino)pyridine (0.1 equiv.) were dissolved in dry THF (2 mL) and the reaction mixture was stirred at r.t. for overnight. After the completion of reaction monitored by TLC, the reaction mixture was diluted with EtOAc and was washed with brine. The resulting mixture was dried with anhydrous  $\text{Na}_2\text{SO}_4(\text{s})$  and condensed under reduced pressure. The residue was purified by silica-gel flash column chromatography (EtOAc:Hex = 1:8 to 1:5 gradient elution) to provide the desired product.

**Synthesis of S24}\{n18/n16\}**, (R,Z)-3-(benzyloxy)-N-((2S,3R)-3-(benzyloxy)-1-(((2S,3R,4S,5S,6R)-3,4,5-tris(benzyloxy)-6-((benzyloxy)methyl)tetrahydro-2H-pyran-2-yl)oxy)octadec-4-yn-2-yl)hexadec-5-enamide

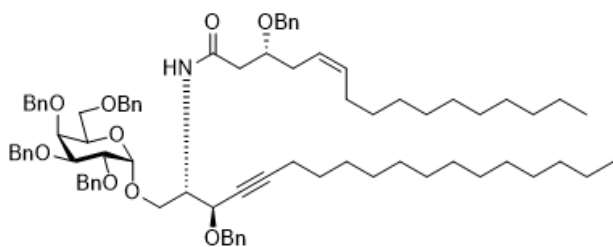

Yield: 67%;  $^1\text{H NMR}$  (500 MHz,  $\text{CDCl}_3$ , reference peak TMS at 0.00 ppm)  $\delta$  7.35–7.18 (m, 30H), 6.61 (d,  $J$  = 8.5 Hz, 1H), 5.48–5.43 (m, 1H), 5.37–5.32 (m, 1H), 4.89 (d,  $J$  = 12.0 Hz, 1H), 4.82 (d,  $J$  = 3.5 Hz, 1H), 4.75–4.69 (m, 3H), 4.60 (t,  $J$  = 12.5 Hz, 2H), 4.53–4.43 (m, 5H), 4.41–4.36 (m, 2H), 3.98 (dd,  $J$  = 10.0, 3.5 Hz, 1H), 3.88–3.84 (m, 3H), 3.80–3.73 (m, 3H), 3.46 (dd,  $J$  = 7.5, 3.0 Hz, 2H), 2.35–2.25 (m, 4H), 2.10 (t,  $J$  = 7.0 Hz, 2H), 1.97 (q,  $J$  = 7.0 Hz, 2H), 1.44 (quint,  $J$  = 7.5 Hz, 2H), 1.29–1.25 (m, 36H), 0.88 (t,  $J$  = 7.0 Hz, 6H);  $^{13}\text{C NMR}$

(75 MHz,  $\text{CDCl}_3$ )  $\delta$  171.2, 139.1, 138.9, 138.7, 138.6, 138.2, 138.0, 132.9, 128.6, 128.5, 128.4, 128.4, 128.4, 128.2, 128.1, 128.0, 127.9, 127.8, 127.7, 127.6, 127.5, 124.6, 98.8, 89.1, 79.1, 75.8, 75.1, 74.9, 73.6, 73.5, 73.5, 71.7, 70.7, 69.8, 69.0, 68.7, 67.6, 52.5, 41.7, 32.1, 32.1, 31.9, 29.9, 29.9, 29.8, 29.6, 29.4, 29.2, 28.9, 27.7, 22.9, 18.9, 14.3; LRMS(ESI)  $m/z$  for  $\text{C}_{82}\text{H}_{110}\text{NO}_9$  [ $\text{M} + \text{Na}$ ] $^+$  calcd: 1252.81, found: 1252.60.

**Synthesis of S24{n18/n15},** (R,Z)-3-(benzyloxy)-N-((2S,3R)-3-(benzyloxy)-1-(((2S,3R,4S,5S,6R)-3,4,5-tris(benzyloxy)-6-((benzyloxy)methyl)tetrahydro-2H-pyran-2-yl)oxy)octadec-4-yn-2-yl)pentadec-5-enamide

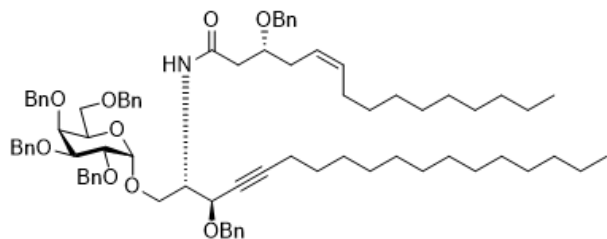

Yield: 87%; <sup>1</sup>H NMR (400 MHz, CDCl<sub>3</sub>, reference peak TMS at 0.00 ppm) δ 7.34–7.18 (m, 30H), 6.62 (d, *J* = 8.4 Hz, 1H), 5.49–5.43 (m, 1H), 5.38–5.32 (m, 1H), 4.89 (d, *J* = 11.6 Hz, 1H), 4.82 (d, *J* = 3.2 Hz, 1H), 4.74–4.69 (m, 3H), 4.60 (t, *J* = 11.2 Hz, 2H), 4.53–4.44 (m, 5H), 4.39–4.33 (m, 2H), 3.98 (dd, *J* = 9.6, 3.2 Hz, 1H), 3.87–3.84 (m, 3H), 3.80–3.76 (m, 3H), 3.46 (d, *J* = 6.4 Hz, 2H), 2.36–2.26 (m, 4H), 2.10 (t, *J* = 6.8 Hz, 2H), 1.97 (q, *J* = 6.8 Hz, 2H), 1.44 (quint, *J* = 7.2 Hz, 2H), 1.25 (bs,

34H), 0.88 (t, *J* = 6.8 Hz, 6H); <sup>13</sup>C NMR (100 MHz, CDCl<sub>3</sub>) δ 171.2, 139.1, 138.9, 138.7, 138.6, 138.2, 138.0, 132.9, 128.6, 128.5, 128.4, 128.4, 128.4, 128.2, 128.1, 128.0, 127.9, 127.8, 127.7, 127.6, 127.5, 124.6, 98.8, 89.0, 79.1, 76.8, 76.7, 75.8, 75.0, 74.9, 73.6, 73.5, 73.2, 71.7, 70.7, 69.7, 69.0, 68.7, 67.6, 52.5, 41.7, 32.1, 32.1, 31.9, 29.9, 29.9, 29.9, 29.8, 29.6, 29.6, 29.5, 29.4, 29.4, 29.2, 28.9, 27.7, 22.9, 18.9, 14.3; LRMS(ESI) *m/z* for C<sub>81</sub>H<sub>108</sub>NO<sub>9</sub> [M + H]<sup>+</sup> calcd: 1238.79, found: 1238.25.

**Synthesis of S24{n18/i17},** (R,Z)-3-(benzyloxy)-N-((2S,3R)-3-(benzyloxy)-1-(((2S,3R,4S,5S,6R)-3,4,5-tris(benzyloxy)-6-((benzyloxy)methyl)tetrahydro-2H-pyran-2-yl)oxy)octadec-4-yn-2-yl)-15-methylhexadec-5-enamide

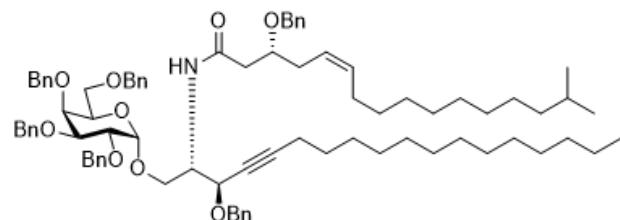

Yield: 84%; <sup>1</sup>H NMR (400 MHz, CDCl<sub>3</sub>, reference peak TMS at 0.00 ppm) δ 7.33–7.18 (m, 30H), 6.59 (d, *J* = 8.8 Hz, 1H), 4.88 (d, *J* = 11.2 Hz, 1H), 4.80 (t, *J* = 2.8 Hz, 1H), 4.80 (d, *J* = 2.8 Hz, 1H), 4.73–4.67 (m, 3H), 4.63–4.56 (m, 3H), 4.52–4.42 (m, 5H), 4.39–4.34 (m, 2H), 3.97 (dt, *J* = 10.0, 3.2 Hz, 1H), 3.85–3.83 (m, 3H), 3.78–3.74 (m, 3H), 3.44 (d, *J* = 6.0 Hz, 2H), 2.34–2.22 (m, 4H), 2.08 (t, *J* = 6.8 Hz, 2H), 1.96 (q, *J* =

6.8 Hz, 2H), 1.53–1.39 (m, 4H), 1.23 (bs, 31H), 1.15–1.13 (m, 2H), 0.88–0.83 (m, 9H); <sup>13</sup>C NMR (75 MHz, CDCl<sub>3</sub>) δ 171.2, 139.1, 138.9, 138.7, 138.6, 138.2, 138.0, 132.9, 128.6, 128.5, 128.5, 128.4, 128.4, 128.2, 128.2, 128.0, 127.9, 127.8, 127.7, 127.6, 127.5, 124.6, 98.8, 89.1, 79.2, 76.8, 76.7, 75.8, 75.1, 75.0, 73.6, 73.5, 73.2, 71.7, 70.7, 69.8, 69.0, 68.7, 67.6, 52.5, 41.7, 39.3, 32.1, 31.9, 31.2, 30.2, 29.9, 29.9, 29.8, 29.8, 29.6, 29.6, 29.4, 29.2, 28.9, 28.2, 27.7, 27.6, 22.9, 22.9, 18.9, 14.3; LRMS(ESI) *m/z* for C<sub>83</sub>H<sub>111</sub>NaNO<sub>9</sub> [M + Na]<sup>+</sup> calcd: 1288.82, found: 1288.50.

**Synthesis of S24{n18/a17},** (3R,Z)-3-(benzyloxy)-N-((2S,3R)-3-(benzyloxy)-1-(((2S,3R,4S,5S,6R)-3,4,5-tris(benzyloxy)-6-((benzyloxy)methyl)tetrahydro-2H-pyran-2-yl)oxy)octadec-4-yn-2-yl)-14-methylhexadec-5-enamide

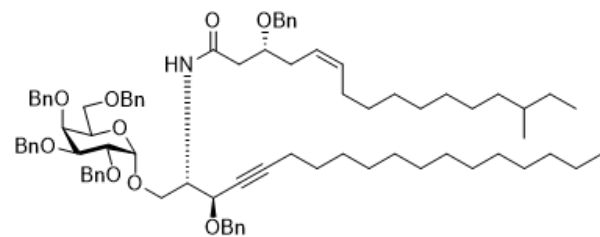

Yield: 44%; <sup>1</sup>H NMR (500 MHz, CDCl<sub>3</sub>, reference peak TMS at 0.00 ppm) δ 7.33–7.18 (m, 30H), 6.62 (d, *J* = 8.5 Hz, 1H), 5.48–5.43 (m, 1H), 5.38–5.32 (m, 1H), 4.89 (d, *J* = 11.5 Hz, 1H), 4.82 (d, *J* = 3.0 Hz, 1H), 4.74–4.69 (m, 3H), 4.60 (t, *J* = 12.5 Hz, 2H), 4.53–4.43 (m, 5H), 4.38 (t, *J* = 12.5 Hz, 2H), 3.98 (d, *J* = 7.5 Hz, 1H), 3.85 (bs, 3H), 3.79–3.76 (m, 3H), 3.46 (d, *J* = 4.0 Hz, 2H), 2.35–2.25 (m, 4H), 2.10 (t, *J* = 6.5 Hz, 2H), 1.97 (q, *J* = 6.5 Hz,

2H), 1.45–1.42 (m, 2H), 1.24 (bs, 33H), 1.13–1.08 (m, 2H), 0.88–0.84 (m, 9H); <sup>13</sup>C NMR (75 MHz, CDCl<sub>3</sub>) δ 170.9, 138.8, 138.6, 138.5, 138.4, 137.9, 137.7, 132.7, 128.3, 128.3, 128.2, 128.0, 127.9, 127.8, 127.7, 127.6, 127.5, 127.4, 127.3, 124.4, 98.6, 88.8, 78.9, 76.6, 76.5, 75.6, 74.7, 73.4, 73.2, 72.9, 71.4, 70.5, 69.5, 68.8, 68.5, 67.4, 52.3, 41.5, 36.6, 34.4, 31.9, 31.7, 30.0, 29.7, 29.6, 29.5, 29.4, 29.4, 29.2, 29.0, 28.7, 27.5, 27.1, 22.7, 19.2, 18.7, 14.1, 11.4; LRMS(ESI) *m/z* for C<sub>83</sub>H<sub>111</sub>NaNO<sub>9</sub> [M + Na]<sup>+</sup> calcd: 1288.82, found: 1288.50.

**Synthesis of S24{n19/n16},** (R,Z)-3-(benzyloxy)-N-((2S,3R)-3-(benzyloxy)-1-(((2S,3R,4S,5S,6R)-3,4,5-tris(benzyloxy)-6-((benzyloxy)methyl)tetrahydro-2H-pyran-2-yl)oxy)nonadec-4-yn-2-yl)hexadec-5-enamide

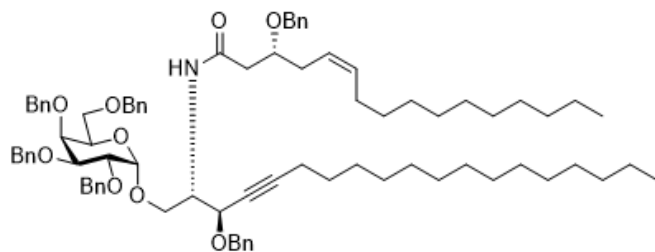

Yield: 76%; <sup>1</sup>H NMR (300 MHz, CDCl<sub>3</sub>, reference peak TMS at 0.00 ppm) δ 7.34–7.18 (m, 30H), 6.62 (d, *J* = 8.4 Hz, 1H), 5.50–5.42 (m, 1H), 5.39–5.31 (m, 1H), 4.89 (d, *J* = 11.4 Hz, 1H), 4.82 (d, *J* = 3.3 Hz, 1H), 4.75–4.68 (m, 3H), 4.65–4.59 (m, 2H), 4.57–4.44 (m, 5H), 4.40–4.35 (m, 2H), 3.98 (dd, *J* = 10.2, 3.6 Hz, 1H), 3.87–3.84 (m, 3H), 3.81–3.71 (m, 3H), 3.47 (d, *J* = 6.0 Hz, 2H), 2.36–2.26 (m, 4H), 2.10 (t, *J* = 6.6 Hz, 2H), 1.97 (q, *J* = 6.6 Hz, 2H), 1.48–1.41 (m, 2H), 1.25 (bs, 38H), 0.88 (t, *J* = 6.6 Hz, 6H); <sup>13</sup>C NMR (75 MHz, CDCl<sub>3</sub>) δ 171.2, 139.1, 138.9, 138.7, 138.2, 138.0, 132.9, 128.6, 128.5, 128.4, 128.4, 128.2, 128.1, 128.0, 127.9, 127.8, 127.7, 127.6, 127.5, 124.6, 98.8, 89.0, 79.1, 75.8, 75.1, 74.9, 73.6, 73.5, 73.2, 71.7, 70.7, 69.8, 69.0, 68.7, 67.6, 52.5, 41.7, 32.1, 31.9, 29.9, 29.9, 29.6, 29.4, 29.2, 28.9, 27.7, 22.9, 18.9, 14.3; LRMS(ESI) *m/z* for C<sub>83</sub>H<sub>111</sub>NO<sub>9</sub> [M + Na]<sup>+</sup> calcd: 1288.82, found: 1288.55.

**Synthesis of S24{n19/n15},** (R,Z)-3-(benzyloxy)-N-((2S,3R)-3-(benzyloxy)-1-(((2S,3R,4S,5S,6R)-3,4,5-tris(benzyloxy)-6-((benzyloxy)methyl)tetrahydro-2H-pyran-2-yl)oxy)nonadec-4-yn-2-yl)pentadec-5-enamide

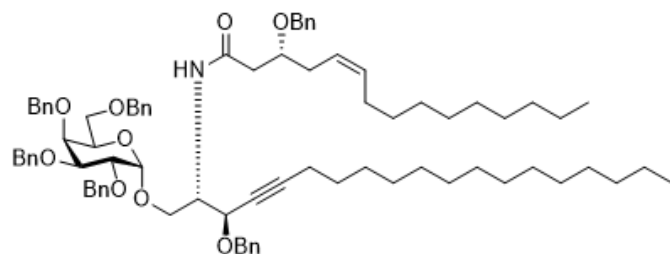

Yield: 78%; <sup>1</sup>H NMR (400 MHz, CDCl<sub>3</sub>, reference peak TMS at 0.00 ppm) δ 7.34–7.17 (m, 30H), 6.62 (d, *J* = 8.8 Hz, 1H), 5.49–5.43 (m, 1H), 5.38–5.32 (m, 1H), 4.89 (d, *J* = 11.2 Hz, 1H), 4.82 (d, *J* = 3.2 Hz, 1H), 4.74–4.69 (m, 3H), 4.60 (t, *J* = 11.2 Hz, 2H), 4.53–4.41 (m, 5H), 4.39–4.33 (m, 2H), 3.98 (dd, *J* = 9.6, 3.2 Hz, 1H), 3.87–3.74 (m, 3H), 3.80–3.75 (m, 3H), 3.46 (d, *J* = 6.0 Hz, 2H), 2.36–2.24 (m, 4H), 2.10 (t, *J* = 6.8 Hz, 2H), 1.97 (q, *J* = 6.8 Hz, 2H), 1.44 (quint, *J* = 7.2 Hz, 2H), 1.25 (bs, 36H), 0.88 (t, *J* = 6.8 Hz, 6H); <sup>13</sup>C NMR (100 MHz, CDCl<sub>3</sub>) δ 171.2, 139.1, 138.9, 138.7, 138.6, 138.2, 138.0, 132.9, 128.6, 128.5, 128.4, 128.4, 128.4, 128.2, 128.1, 128.0, 127.9, 127.8, 127.7, 127.6, 127.5, 124.6, 98.8, 89.0, 79.1, 76.8, 76.7, 75.8, 75.0, 74.9, 73.6, 73.5, 73.2, 71.7, 70.7, 69.7, 69.0, 68.7, 67.6, 52.5, 41.7, 32.1, 32.1, 31.9, 29.9, 29.9, 29.9, 29.8, 29.6, 29.5, 29.4, 29.4, 29.2, 28.9, 27.7, 22.9, 18.9, 14.3; LRMS(ESI) *m/z* for C<sub>82</sub>H<sub>109</sub>NaNO<sub>9</sub> [M + Na]<sup>+</sup> calcd: 1274.80, found: 1274.80.

**Synthesis of S24{n19/i17},** (R,Z)-3-(benzyloxy)-N-((2S,3R)-3-(benzyloxy)-1-(((2S,3R,4S,5S,6R)-3,4,5-tris(benzyloxy)-6-((benzyloxy)methyl)tetrahydro-2H-pyran-2-yl)oxy)nonadec-4-yn-2-yl)-15-methylhexadec-5-enamide

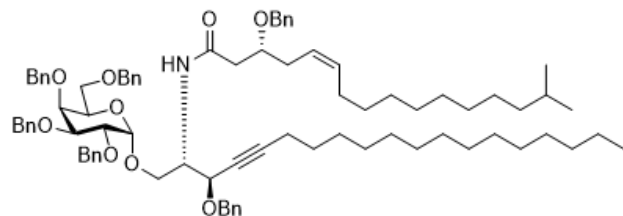

Yield: 78%; <sup>1</sup>H NMR (400 MHz, CDCl<sub>3</sub>, reference peak TMS at 0.00 ppm) δ 7.33–7.18 (m, 30H), 6.59 (d, *J* = 8.8 Hz, 1H), 5.47–5.41 (m, 1H), 5.37–5.30 (m, 1H), 4.88 (d, *J* = 11.2 Hz, 1H), 4.80 (d, *J* = 2.4 Hz, 1H), 4.73–4.6 (m, 3H), 4.59 (t, *J* = 11.2 Hz, 2H), 4.52–4.42 (m, 5H), 4.39–4.34 (m, 2H), 3.97 (ddd, *J* = 9.6, 3.4, 1.2 Hz, 1H), 3.85–3.83 (m, 3H), 3.78 (bs, 1H), 3.76–3.73 (m, 2H), 3.45 (d, *J* = 6.0 Hz, 2H), 2.34–2.23 (m, 4H), 2.08 (t, *J* = 6.8 Hz, 2H), 1.96 (q, *J* = 6.8 Hz, 2H), 1.51–1.39 (4H), 1.23 (bs, 33H), 1.16–1.01 (m, 2H), 0.88–0.84 (m, 9H); <sup>13</sup>C NMR (100 MHz, CDCl<sub>3</sub>) δ 171.2, 139.1, 138.9, 138.7, 138.6, 138.2, 138.0, 132.9, 128.6, 128.5, 128.5, 128.4, 128.4, 128.2, 128.2, 128.0, 127.9, 127.8, 127.7, 127.6, 127.5, 124.6, 98.8, 89.1, 79.2, 76.8, 76.7, 75.8, 75.1, 74.9, 73.6, 73.5, 73.2, 71.7, 70.7, 69.8, 69.0, 68.7, 67.6, 52.5, 41.7, 39.3, 32.1, 31.9, 31.2, 30.2, 29.9, 29.9, 29.9, 29.8, 29.8, 29.6, 29.6, 29.4, 29.2, 28.9, 28.2, 27.7, 27.7, 22.9, 22.9, 18.9, 14.3; LRMS(ESI) *m/z* for C<sub>84</sub>H<sub>114</sub>NO<sub>9</sub> [M + H]<sup>+</sup> calcd: 1280.84, found: 1280.60.

**Synthesis of S24{n19/a17}**, (3R,Z)-3-(benzyloxy)-N-((2S,3R)-3-(benzyloxy)-1-(((2S,3R,4S,5S,6R)-3,4,5-tris(benzyloxy)-6-((benzyloxy)methyl)tetrahydro-2H-pyran-2-yl)oxy)nonadec-4-yn-2-yl)-14-methylhexadec-5-enamide

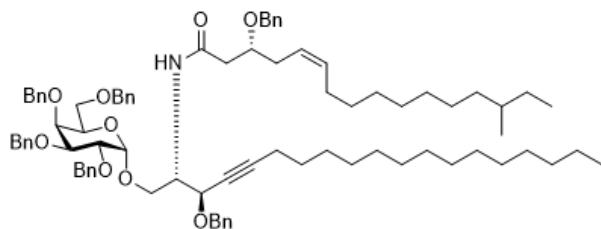

Yield: 42%; <sup>1</sup>H NMR (500 MHz, CDCl<sub>3</sub>, reference peak TMS at 0.00 ppm) δ 7.33–7.18 (m, 30H), 6.62 (d, *J* = 8.5 Hz, 1H), 5.48–5.43 (m, 1H), 5.37–5.32 (m, 1H), 4.89 (d, *J* = 11.5 Hz, 1H), 4.82 (d, *J* = 2.5 Hz, 1H), 4.74–4.69 (m, 3H), 4.60 (t, *J* = 12.5 Hz, 2H), 4.53–4.43 (m, 5H), 4.38 (t, *J* = 12.5 Hz, 2H), 3.98 (dd, *J* = 9.5, 2.5 Hz, 1H), 3.85 (bs, 3H), 3.80–3.76 (m, 3H), 3.46 (d, *J* = 5.0 Hz, 2H), 2.35–2.26 (m, 4H), 2.09 (t, *J* = 6.5 Hz, 2H), 1.97 (q, *J* = 6.5 Hz, 2H), 1.45–1.41 (m, 2H), 1.25 (bs, 35H), 1.14–1.10 (m, 2H), 0.89–0.84 (m, 9H); <sup>13</sup>C NMR (100 MHz, CDCl<sub>3</sub>) δ 171.2, 139.1, 138.9, 138.7, 138.6, 138.2, 138.0, 132.9, 128.6, 128.5, 128.4, 128.4, 128.4, 128.2, 128.1, 128.0, 127.9, 127.8, 127.7, 127.6, 127.5, 124.6, 98.8, 89.1, 79.1, 76.8, 76.7, 75.8, 75.0, 74.9, 73.6, 73.5, 73.2, 71.7, 70.7, 69.8, 69.8, 69.0, 68.7, 67.6, 52.5, 41.7, 36.9, 34.6, 32.1, 31.9, 30.2, 29.9, 29.9, 29.8, 29.7, 29.6, 29.6, 29.4, 29.2, 29.9, 27.7, 27.3, 22.9, 19.4, 18.9, 14.3, 11.6; LRMS(ESI) *m/z* for C<sub>84</sub>H<sub>114</sub>NO<sub>9</sub> [M + H]<sup>+</sup> calcd: 1280.84, found: 1280.60.

**Synthesis of S24{i17/n16}**, (R,Z)-3-(benzyloxy)-N-((2S,3R)-3-(benzyloxy)-15-methyl-1-(((2S,3R,4S,5S,6R)-3,4,5-tris(benzyloxy)-6-((benzyloxy)methyl)tetrahydro-2H-pyran-2-yl)oxy)hexadec-4-yn-2-yl)hexadec-5-enamide

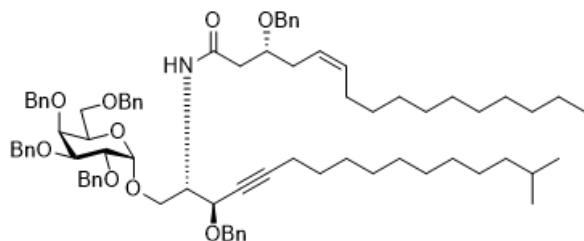

Yield: 76%; <sup>1</sup>H NMR (300 MHz, CDCl<sub>3</sub>, reference peak TMS at 0.00 ppm) δ 7.34–7.18 (m, 30H), 6.61 (d, *J* = 8.4 Hz, 1H), 5.50–5.42 (m, 1H), 5.39–5.32 (m, 1H), 4.89 (d, *J* = 11.4 Hz, 1H), 4.82 (d, *J* = 3.3 Hz, 1H), 4.75–4.97 (m, 3H), 4.64 (d, *J* = 5.1 Hz, 2H), 4.57–4.41 (m, 5H), 4.40–4.35 (m, 2H), 3.98 (dd, *J* = 9.9, 3.6 Hz, 1H), 3.87–3.84 (m, 3H), 3.81–3.68 (m, 3H), 3.71–3.46 (d, *J* = 6.0 Hz, 2H), 2.36–2.23 (m, 4H), 2.10 (t, *J* = 6.6 Hz, 2H), 1.97 (q, *J* = 6.6 Hz, 2H), 1.55–1.40 (m, 4H), 1.25 (bs, 27H), 1.17–1.13 (m, 2H), 0.88–0.75 (m, 9H); <sup>13</sup>C NMR (75 MHz, CDCl<sub>3</sub>) δ 171.2, 139.1, 138.9, 138.7, 138.6, 138.2, 138.0, 132.9, 128.6, 128.5, 128.4, 128.4, 128.2, 128.1, 128.0, 127.9, 127.8, 127.7, 127.6, 127.5, 124.6, 98.8, 89.0, 79.1, 76.8, 75.8, 75.1, 74.9, 73.6, 73.5, 73.2, 71.7, 70.7, 69.8, 69.0, 68.7, 67.6, 52.5, 41.7, 39.3, 32.1, 31.9, 30.1, 29.9, 29.9, 29.8, 29.6, 29.6, 29.4, 29.2, 28.9, 28.2, 27.6, 22.9, 18.9, 14.3; LRMS(ESI) *m/z* for C<sub>81</sub>H<sub>107</sub>NO<sub>9</sub> [M + Na]<sup>+</sup> calcd: 1260.78, found: 1260.70.

**Synthesis of S24{i17/n15}**, (R,Z)-3-(benzyloxy)-N-((2S,3R)-3-(benzyloxy)-15-methyl-1-(((2S,3R,4S,5S,6R)-3,4,5-tris(benzyloxy)-6-((benzyloxy)methyl)tetrahydro-2H-pyran-2-yl)oxy)hexadec-4-yn-2-yl)pentadec-5-enamide

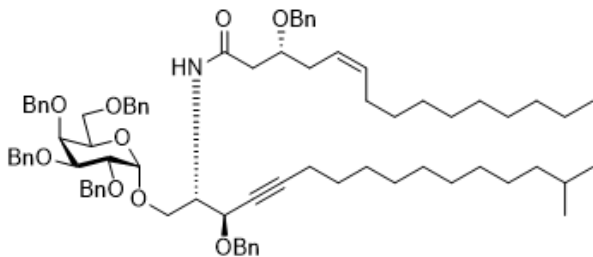

Yield: 99%; <sup>1</sup>H NMR (300 MHz, CDCl<sub>3</sub>, reference peak TMS at 0.00 ppm) δ 7.34–7.18 (m, 30H), 6.61 (d, *J* = 8.4 Hz, 1H), 5.50–5.42 (m, 1H), 5.39–5.31 (m, 1H), 4.892 (d, *J* = 11.4 Hz, 1H), 4.82 (d, *J* = 3.3 Hz, 1H), 4.75–4.68 (m, 3H), 4.62 (d, *J* = 8.1 Hz, 2H), 4.55 (d, *J* = 8.1 Hz, 1H), 4.50–4.42 (m, 4H), 4.40–4.35 (m, 2H), 3.98 (dd, *J* = 9.9, 3.3 Hz, 1H), 3.87–3.84 (m, 3H), 3.81–3.75 (m, 3H), 3.46 (d, *J* = 6.3 Hz, 2H), 2.36–2.26 (m, 4H), 2.10 (t, *J* = 6.6 Hz, 2H), 1.97 (q, *J* = 6.6 Hz, 2H), 1.55–1.39 (m, 4H), 1.25 (bs, 27H), 1.17–1.13 (m, 2H), 0.90–0.85 (m, 9H); <sup>13</sup>C NMR (75 MHz, CDCl<sub>3</sub>) δ 171.2, 139.1, 138.9, 138.7, 138.6, 138.2, 138.0, 132.9, 128.6, 128.5, 128.4, 128.4, 128.4, 128.4, 128.2, 128.1, 128.0, 127.9, 127.8, 127.7, 127.6, 127.5, 124.6, 98.8, 89.0, 79.2, 75.8, 75.1, 74.9, 73.6, 73.5, 73.2, 71.7, 70.7, 69.8, 69.0, 68.7, 67.6, 52.5, 41.7, 39.3, 32.1, 32.1, 31.9, 30.2, 29.9, 29.8, 29.6, 29.6, 29.5, 29.4, 29.2, 28.9, 28.2, 27.6, 22.9, 18.9, 14.3; LRMS(ESI) *m/z* for C<sub>82</sub>H<sub>111</sub>NaNO<sub>9</sub> [M + Na]<sup>+</sup> calcd: 1246.77, found: 1246.35.

**Synthesis of S24{i17/i17}**, (R,Z)-3-(benzyloxy)-N-((2S,3R)-3-(benzyloxy)-15-methyl-1-(((2S,3R,4S,5S,6R)-3,4,5-tris(benzyloxy)-6-((benzyloxy)methyl)tetrahydro-2H-pyran-2-yl)oxy)hexadec-4-yn-2-yl)-15-methylhexadec-5-enamide

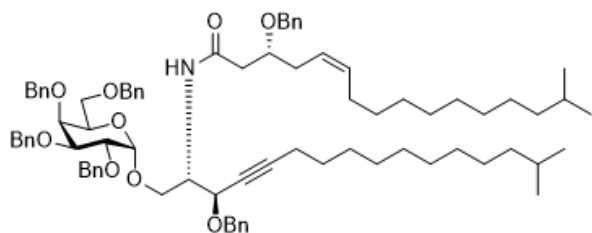

Yield: 78%; <sup>1</sup>H NMR (500 MHz, CDCl<sub>3</sub>, reference peak TMS at 0.00 ppm) δ 7.38–7.17 (m, 30H), 6.61 (d, *J* = 8.5 Hz, 1H), 5.45 (m, 1H), 5.35 (m, 1H), 4.89 (d, *J* = 11.5 Hz, 1H), 4.82 (d, *J* = 3.5 Hz, 1H), 4.74–4.69 (m, 3H), 4.60 (t, *J* = 12.5 MHz, 2H), 4.53–4.43 (m, 5H), 4.38 (t, *J* = 13.0 Hz, 3H), 3.98 (dd, *J* = 10.5, 3.5 Hz, 1H), 3.87–3.82 (m, 3H), 3.80–3.75 (m, 3H), 3.48–3.44 (m, 2H), 2.35–2.23 (m, 4H), 2.10 (t, *J* = 7.0 Hz, 2H), 1.97 (q, *J* = 7.0 Hz, 2H), 1.54–1.47 (m, 1H), 1.45–1.41 (m, 1H), 1.24 (m, 26H),

1.14 (m, 4H), 0.86 (dd, *J* = 6.5, 2.0 Hz, 12H); <sup>13</sup>C NMR (75 MHz, CDCl<sub>3</sub>) δ 173.6, 171.0, 138.9, 138.7, 138.5, 138.5, 138.0, 137.8, 132.7, 128.4, 128.3, 128.2, 128.2, 128.0, 127.9, 127.8, 127.7, 127.6, 127.6, 127.4, 127.3, 124.4, 98.6, 88.9, 79.0, 75.6, 74.9, 74.8, 73.5, 73.3, 73.0, 71.5, 70.6, 69.6, 68.9, 68.5, 67.4, 52.3, 41.6, 39.1, 31.7, 30.0, 29.7, 29.6, 29.4, 29.2, 29.0, 28.7, 28.0, 27.4, 22.7, 18.7; LRMS(ESI) *m/z* for C<sub>82</sub>H<sub>109</sub>NaNO<sub>9</sub> [M + Na]<sup>+</sup> calcd: 1274.80, found: 1274.60.

**Synthesis of S24{i17/a17}**, (3R,Z)-3-(benzyloxy)-N-((2S,3R)-3-(benzyloxy)-15-methyl-1-(((2S,3R,4S,5S,6R)-3,4,5-tris(benzyloxy)-6-((benzyloxy)methyl)tetrahydro-2H-pyran-2-yl)oxy)hexadec-4-yn-2-yl)-14-methylhexadec-5-enamide

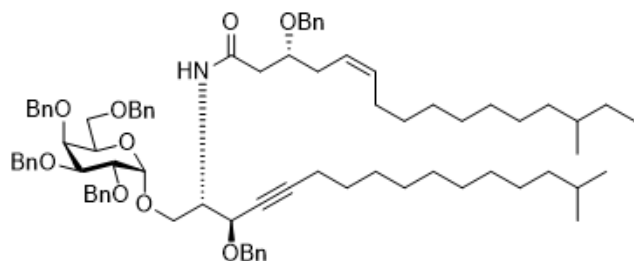

Yield: 19%; <sup>1</sup>H NMR (500 MHz, CDCl<sub>3</sub>, reference peak TMS at 0.00 ppm) δ 7.33–7.18 (m, 30H), 6.62 (d, *J* = 8.5 Hz, 1H), 5.48–5.43 (m, 1H), 5.37–5.36 (m, 1H), 4.89 (d, *J* = 11.5 Hz, 1H), 4.82 (d, *J* = 3.0 Hz, 1H), 4.74–4.69 (m, 3H), 4.60 (t, *J* = 12.5 Hz, 2H), 4.55–4.43 (m, 5H), 4.38 (t, *J* = 12.5 Hz, 2H), 3.98 (dd, *J* = 9.5, 3.0 Hz, 1H), 3.85 (bs, 3H), 3.77–3.73 (m, 3H), 3.46 (d, *J* = 5.0 Hz, 2H), 2.35–2.25 (m, 4H), 2.09 (t, *J* = 6.0 Hz, 2H), 1.99–1.95 (m, 2H), 1.53–1.41 (m, 4H), 1.25 (bs, 28H), 1.15–1.10 (m, 2H), 0.86 (d, *J* = 6.5 Hz, 12H); <sup>13</sup>C

NMR (75 MHz, CDCl<sub>3</sub>) δ 171.2, 139.1, 138.9, 138.7, 138.2, 138.0, 132.9, 128.6, 128.5, 128.5, 128.4, 128.2, 128.2, 128.0, 127.9, 127.8, 127.6, 127.5, 124.6, 98.8, 89.1, 79.1, 75.8, 75.0, 75.0, 73.7, 73.5, 73.2, 71.7, 70.8, 69.8, 69.0, 68.7, 67.6, 52.5, 41.8, 39.3, 36.9, 34.6, 31.9, 30.2, 30.2, 29.9, 29.9, 29.7, 29.6, 29.4, 29.2, 28.9, 28.2, 27.7, 27.3, 22.9, 19.4, 18.9, 11.6; LRMS(ESI) *m/z* for C<sub>82</sub>H<sub>109</sub>NaNO<sub>9</sub> [M + Na]<sup>+</sup> calcd: 1274.80, found: 1274.60.

**Synthesis of S24{a17/n16}**, (3R,Z)-3-(benzyloxy)-N-((2S,3R)-3-(benzyloxy)-14-methyl-1-(((2S,3R,4S,5S,6R)-3,4,5-tris(benzyloxy)-6-((benzyloxy)methyl)tetrahydro-2H-pyran-2-yl)oxy)hexadec-4-yn-2-yl)hexadec-5-enamide

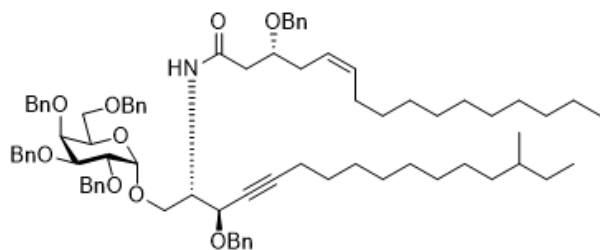

Yield: 82%; <sup>1</sup>H NMR (500 MHz, CDCl<sub>3</sub>, reference peak TMS at 0.00 ppm) δ 7.35–7.18 (m, 30H), 6.62 (d, *J* = 8.5 Hz, 1H), 5.48–5.43 (m, 1H), 5.37–5.32 (m, 1H), 4.89 (d, *J* = 11.5 Hz, 1H), 4.82 (d, *J* = 3.5 Hz, 1H), 4.74–4.69 (m, 3H), 4.66–4.58 (m, 2H), 4.53–4.43 (m, 5H), 4.41–4.36 (m, 2H), 3.98 (dd, *J* = 10.0, 3.5 Hz, 1H), 3.38–3.84 (m, 3H), 3.80–3.74 (m, 3H), 3.47–3.45 (m, 2H), 2.35–2.26 (m, 4H), 2.10 (t, *J* = 6.5 Hz, 2H), 1.97 (q, *J* = 6.5 Hz, 2H), 1.44 (quint, *J* = 7.0 Hz, 2H), 1.25 (bs, 29H), 1.15–1.08 (m, 2H),

0.89–0.83 (m, 9H); <sup>13</sup>C NMR (75 MHz, CDCl<sub>3</sub>) δ 171.2, 139.1, 138.9, 138.7, 138.6, 138.2, 138.0, 132.9, 128.6, 128.5, 128.4, 128.4, 128.4, 128.2, 128.1, 128.0, 127.9, 127.8, 127.7, 127.6, 127.5, 124.6, 98.8, 89.0, 79.1, 75.8, 75.1, 75.0, 73.6, 73.5, 73.2, 71.7, 70.7, 69.8, 69.0, 68.7, 67.8, 52.5, 41.7, 36.9, 34.6, 32.1, 32.1, 31.9, 20.2, 29.9, 29.7, 29.6,



29.6, 29.4, 29.2, 28.9, 27.7, 27.3, 22.9, 19.4, 18.9, 14.3, 11.6; LRMS(ESI)  $m/z$  for  $C_{81}H_{107}NO_9$   $[M + Na]^+$  calcd: 1260.78, found: 1260.70.

**Synthesis of S24{a17/n15}**, (3R,Z)-3-(benzyloxy)-N-((2S,3R)-3-(benzyloxy)-14-methyl-1-(((2S,3R,4S,5S,6R)-3,4,5-tris(benzyloxy)-6-((benzyloxy)methyl)tetrahydro-2H-pyran-2-yl)oxy)hexadec-4-yn-2-yl)pentadec-5-enamide

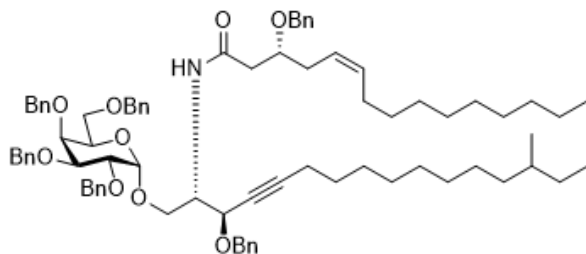

Yield: 74%;  $^1H$  NMR (400 MHz,  $CDCl_3$ , reference peak TMS at 0.00 ppm)  $\delta$  7.34–7.18 (m, 30H), 6.61 (d,  $J = 8.8$  Hz, 1H), 5.49–5.43 (m, 1H), 5.38–5.32 (m, 1H), 4.89 (d,  $J = 11.6$  Hz, 1H), 4.82 (d,  $J = 3.6$  Hz, 1H), 4.74–4.69 (m, 3H), 4.66–4.55 (m, 2H), 4.53–4.44 (m, 5H), 4.01–4.35 (m, 2H), 3.98 (dd,  $J = 9.6, 3.2$  Hz, 1H), 3.87–3.84 (m, 3H), 3.80–3.66 (m, 3H), 3.46 (d,  $J = 5.6$  Hz, 2H), 2.36–2.26 (m, 4H), 2.10 (t,  $J = 6.4$  Hz, 2H), 1.97 (q,  $J = 6.8$  Hz, 2H), 1.46–1.40 (m, 2H), 1.25 (bs, 27H), 1.14–1.10 (m, 2H), 0.89–

0.83 (m, 9H);  $^{13}C$  NMR (75 MHz,  $CDCl_3$ )  $\delta$  171.2, 139.1, 138.9, 138.7, 138.6, 138.2, 138.0, 132.9, 128.6, 128.5, 128.4, 128.2, 128.1, 128.0, 127.9, 127.8, 127.7, 127.6, 127.6, 127.5, 124.6, 98.8, 89.0, 79.1, 76.8, 76.7, 75.8, 75.0, 74.9, 73.6, 73.5, 73.5, 71.7, 70.7, 69.7, 69.0, 68.7, 67.6, 52.5, 41.7, 36.9, 34.6, 32.1, 32.1, 31.9, 30.2, 29.8, 29.8, 29.7, 29.6, 29.6, 29.5, 29.4, 29.2, 28.9, 27.7, 27.3, 22.8, 19.4, 18.9, 14.3, 11.6; LRMS(ESI)  $m/z$  for  $C_{82}H_{111}NaNO_9$   $[M + Na]^+$  calcd: 1246.77, found: 1246.35.

**Synthesis of S24{a17/i17}**, (3R,Z)-3-(benzyloxy)-N-((2S,3R)-3-(benzyloxy)-14-methyl-1-(((2S,3R,4S,5S,6R)-3,4,5-tris(benzyloxy)-6-((benzyloxy)methyl)tetrahydro-2H-pyran-2-yl)oxy)hexadec-4-yn-2-yl)-15-methylhexadec-5-enamide

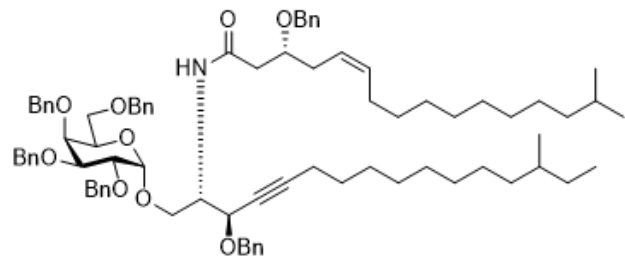

Yield: 81%;  $^1H$  NMR (400 MHz,  $CDCl_3$ , reference peak TMS at 0.00 ppm)  $\delta$  7.34–7.18 (m, 30H), 6.61 (d,  $J = 8.4$  Hz, 1H), 5.49–5.43 (m, 1H), 5.38–5.32 (m, 1H), 4.89 (d,  $J = 12.0$  Hz, 1H), 4.82 (d,  $J = 3.6$  Hz, 1H), 4.74–4.68 (m, 3H), 4.66–4.57 (m, 3H), 4.53–4.44 (m, 5H), 4.41–4.36 (m, 2H), 3.98 (dd,  $J = 9.6, 3.2$  Hz, 1H), 3.87–3.84 (m, 3H), 3.80–3.75 (m, 3H), 3.49–3.86 (m, 2H), 2.36–2.24 (m, 4H), 2.10 (t,  $J = 6.8$  Hz, 2H), 1.97 (q,  $J = 6.4$  Hz, 2H), 1.54–1.40 (m, 4H), 1.25 (bs, 25H), 1.15–

1.07 (m, 4H), 0.86 (d,  $J = 6.4$  Hz, 6H), 0.85–0.82 (m, 6H);  $^{13}C$  NMR (75 MHz,  $CDCl_3$ )  $\delta$  171.2, 139.1, 138.9, 138.7, 138.7, 138.2, 138.0, 132.9, 128.6, 128.5, 128.5, 128.4, 128.4, 128.2, 128.1, 128.0, 127.9, 127.8, 127.7, 127.6, 128.5, 124.6, 98.8, 89.1, 79.2, 75.8, 75.1, 75.0, 73.7, 73.5, 73.2, 71.7, 70.8, 69.8, 69.1, 68.8, 67.6, 52.5, 41.8, 39.3, 36.9, 34.6, 31.9, 31.1, 30.3, 30.2, 29.9, 29.8, 29.7, 29.6, 29.4, 29.2, 28.9, 28.2, 27.7, 27.6, 27.3, 22.9, 19.4, 18.9, 11.6; LRMS(ESI)  $m/z$  for  $C_{82}H_{109}NaNO_9$   $[M + Na]^+$  calcd: 1274.80, found: 1274.60.

**Synthesis of S24{a17/a17}**, (3R,Z)-3-(benzyloxy)-N-((2S,3R)-3-(benzyloxy)-14-methyl-1-(((2S,3R,4S,5S,6R)-3,4,5-tris(benzyloxy)-6-((benzyloxy)methyl)tetrahydro-2H-pyran-2-yl)oxy)hexadec-4-yn-2-yl)-14-methylhexadec-5-enamide

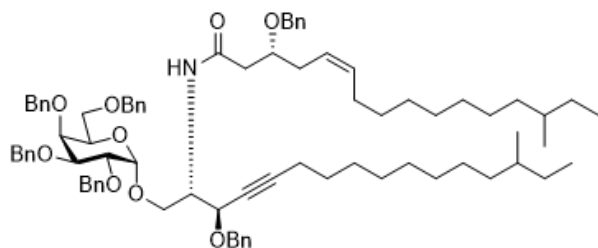

Yield: 26%; <sup>1</sup>H NMR (500 MHz, CDCl<sub>3</sub>, reference peak TMS at 0.00 ppm) δ 7.33–7.18 (m, 30H), 6.62 (d, *J* = 8.5 Hz, 1H), 4.89 (d, *J* = 11.5 Hz, 1H), 4.85 (d, *J* = 4.0 Hz, 1H), 4.78–4.69 (m, 3H), 4.66–4.58 (m, 3H), 4.54–4.43 (m, 5H), 4.38 (t, *J* = 12.5 Hz, 2H), 3.98 (dd, *J* = 10.0, 3.5 Hz, 1H), 3.85 (bs, 3H), 3.80–3.73 (m, 3H), 3.46 (d, *J* = 6.0 Hz, 2H), 2.35–2.25 (m, 4H), 2.10 (t, *J* = 6.0 Hz, 2H), 1.97 (q, *J* = 6.5 Hz, 2H), 1.47–1.41 (m, 2H), 1.26 (bs, 28H), 1.13–1.07 (m, 2H), 0.86–0.83 (m, 12H); <sup>13</sup>C NMR (75 MHz,

CDCl<sub>3</sub>) δ 171.2, 139.1, 138.9, 138.7, 138.7, 138.2, 138.0, 132.9, 128.6, 128.5, 128.5, 128.4, 128.4, 128.2, 128.2, 128.0, 127.9, 127.8, 127.7, 127.6, 127.6, 127.5, 124.6, 98.8, 89.1, 79.2, 85.8, 75.1, 75.0, 73.7, 73.5, 73.2, 71.7, 70.8, 69.8, 69.0, 68.7, 67.6, 52.5, 41.8, 36.9, 34.6, 31.9, 30.2, 30.2, 29.9, 29.9, 29.7, 29.6, 29.4, 29.2, 28.9, 27.7, 27.3, 19.4, 18.9, 11.6; LRMS(ESI) *m/z* for C<sub>82</sub>H<sub>109</sub>NaNO<sub>9</sub> [M + Na]<sup>+</sup> calcd: 1274.80, found: 1274.60.

**Synthesis of S24{i17/n17}**, (R,Z)-3-(benzyloxy)-N-((2S,3R)-3-(benzyloxy)-15-methyl-1-(((2S,3R,4S,5S,6R)-3,4,5-tris(benzyloxy)-6-((benzyloxy)methyl)tetrahydro-2H-pyran-2-yl)oxy)hexadec-4-yn-2-yl)heptadec-5-enamide

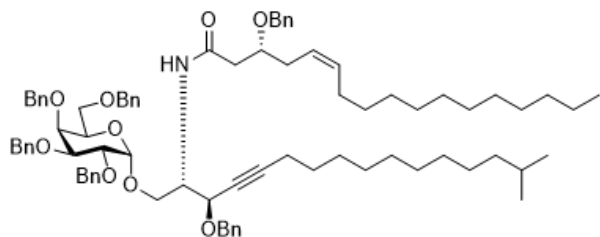

Yield: 76%; <sup>1</sup>H NMR (400 MHz, CDCl<sub>3</sub>, reference peak TMS at 0.00 ppm) δ 7.34–7.20 (m, 30H), 6.62 (d, *J* = 8.4 Hz, 1H), 5.49–5.43 (m, 1H), 5.38–5.33 (m, 1H), 4.89 (d, *J* = 11.2 Hz, 1H), 4.82 (d, *J* = 2.8 Hz, 1H), 4.74–4.68 (m, 3H), 4.65–4.57 (m, 2H), 4.53–4.44 (m, 5H), 4.41–4.36 (m, 2H), 3.98 (dd, *J* = 9.6, 3.2 Hz, 1H), 3.87–3.84 (m, 3H), 3.80–3.76 (m, 3H), 3.46 (d, *J* = 6.0 Hz, 2H), 2.37–2.26 (m, 4H), 2.09 (t, *J* = 6.4 Hz, 2H), 1.97 (q, *J* = 6.4 Hz, 2H), 1.54–1.41 (m, 3H), 1.25 (bs, 30H), 1.46 (bs, 2H),

0.88–0.85 (m, 9H); <sup>13</sup>C NMR (100 MHz, CDCl<sub>3</sub>) δ 171.2, 139.1, 138.9, 138.7, 138.6, 138.2, 138.0, 132.9, 128.6, 128.5, 128.4, 128.4, 128.4, 128.2, 128.2, 128.0, 127.9, 127.8, 127.7, 127.6, 127.6, 127.5, 124.6, 98.8, 89.1, 79.1, 76.8, 76.7, 75.8, 75.0, 75.0, 73.6, 73.5, 73.2, 71.7, 70.7, 69.8, 69.0, 68.7, 67.6, 52.5, 41.7, 39.3, 32.1, 31.9, 30.1, 29.9, 29.9, 29.8, 29.6, 29.6, 29.4, 29.2, 28.9, 28.2, 27.7, 27.6, 22.9, 22.9, 18.9, 14.3; LRMS(ESI) *m/z* for C<sub>82</sub>H<sub>109</sub>NO<sub>9</sub> [M + Na]<sup>+</sup> calcd: 1274.80, found: 1274.60.

**Synthesis of S24{a17/n17}**, (3R,Z)-3-(benzyloxy)-N-((2S,3R)-3-(benzyloxy)-14-methyl-1-(((2S,3R,4S,5S,6R)-3,4,5-tris(benzyloxy)-6-((benzyloxy)methyl)tetrahydro-2H-pyran-2-yl)oxy)hexadec-4-yn-2-yl)heptadec-5-enamide

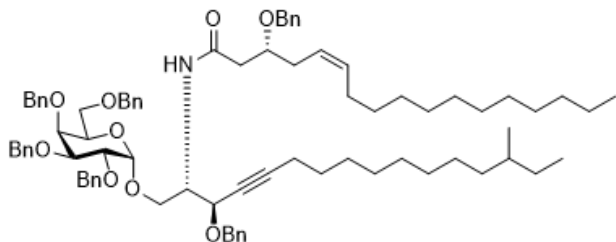

Yield: 57%; <sup>1</sup>H NMR (400 MHz, CDCl<sub>3</sub>, reference peak TMS at 0.00 ppm) δ 7.34–7.20 (m, 30H), 6.63 (d, *J* = 8.4 Hz, 1H), 5.49–5.43 (m, 1H), 5.38–5.29 (m, 1H), 4.89 (d, *J* = 11.2 Hz, 1H), 4.82 (d, *J* = 3.2 Hz, 1H), 4.74–4.69 (m, 3H), 4.66–4.57 (m, 3H), 4.53–4.44 (m, 4H), 4.41–4.36 (m, 2H), 3.98 (dd, *J* = 9.6, 3.2 Hz, 1H), 3.87–3.84 (m, 3H), 3.80–3.86 (m, 3H), 3.46 (d, *J* = 6.4 Hz, 2H), 2.36–2.24 (m, 4H), 2.10 (t, *J* = 6.8 Hz, 2H), 1.97 (q, *J* = 6.8 Hz, 2H), 1.44 (quint, *J* = 6.8 Hz, 3H), 1.25 (bs, 30H),

1.14–1.09 (m, 2H), 0.89–0.83 (m, 9H); <sup>13</sup>C NMR (100 MHz, CDCl<sub>3</sub>) δ 171.2, 139.1, 138.9, 138.7, 138.6, 138.2, 138.0, 132.9, 128.6, 128.5, 128.4, 128.4, 128.4, 128.2, 128.1, 128.0, 127.9, 127.8, 127.7, 127.6, 127.5, 124.6, 98.8, 89.0, 79.1, 76.8, 76.7, 75.8, 75.1, 74.9, 73.6, 73.5, 73.2, 71.7, 70.7, 69.8, 69.0, 68.7, 67.6, 53.6, 52.5, 41.7, 36.9, 34.6, 32.1, 31.9, 30.2, 29.9, 29.9, 29.8, 29.7, 29.6, 29.6, 29.4, 29.2, 28.9, 27.7, 27.3, 22.9, 19.4, 18.9, 14.3, 11.6; LRMS(ESI) *m/z* for C<sub>82</sub>H<sub>109</sub>NO<sub>9</sub> [M + Na]<sup>+</sup> calcd: 1274.80, found: 1274.60.

**Synthesis of S24{n17/n17}**, (R,Z)-3-(benzyloxy)-N-((2S,3R)-3-(benzyloxy)-1-(((2S,3R,4S,5S,6R)-3,4,5-tris(benzyloxy)-6-((benzyloxy)methyl)tetrahydro-2H-pyran-2-yl)oxy)heptadec-4-yn-2-yl)heptadec-5-enamide

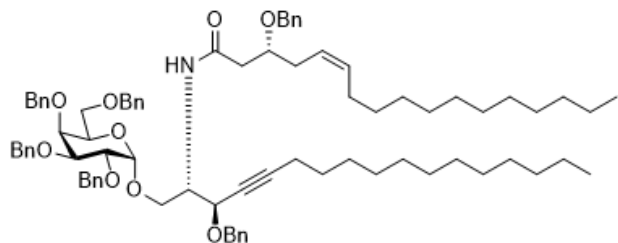

Yield: 31%; <sup>1</sup>H NMR (400 MHz, CDCl<sub>3</sub>, reference peak TMS at 0.00 ppm) δ 7.36–7.20 (m, 30H), 6.63 (d, *J* = 8.8 Hz, 1H), 5.49–5.43 (m, 1H), 5.38–5.32 (m, 1H), 4.89 (d, *J* = 11.2 Hz, 1H), 4.82 (d, *J* = 3.2 Hz, 1H), 4.74–4.68 (m, 3H), 4.60 (t, *J* = 11.2 Hz, 2H), 4.56–4.44 (m, 5H), 4.41–4.36 (m, 2H), 3.98 (dd, *J* = 10.0, 3.2 Hz, 1H), 3.87–3.84 (m, 3H), 3.77 (s, 1H), 3.76–3.72 (m, 2H), 3.46 (d, *J* = 6.0 Hz, 2H), 2.36–2.26 (m, 4H), 2.10

(t, *J* = 6.8 Hz, 2H), 1.97 (q, *J* = 6.8 Hz, 2H), 1.44 (quint, *J* = 6.8 Hz, 2H), 1.26 (bs, 36H), 0.88 (t, *J* = 6.8 Hz, 6H); <sup>13</sup>C NMR (100 MHz, CDCl<sub>3</sub>) δ 171.2, 139.1, 138.9, 138.7, 138.6, 138.2, 138.0, 132.9, 128.6, 128.5, 128.4, 128.4, 128.2, 128.2, 128.0, 127.9, 127.8, 127.8, 127.7, 127.6, 127.5, 124.6, 98.8, 89.0, 79.1, 76.8, 76.7, 75.8, 75.0, 74.9, 73.6, 73.5, 73.2, 71.7, 70.7, 69.7, 69.0, 68.7, 67.6, 60.6, 52.5, 41.7, 32.1, 31.9, 29.9, 29.9, 29.8, 29.8, 29.8, 29.6, 29.6, 29.4, 29.2, 28.9, 27.7, 22.9, 21.3, 18.9, 14.4, 14.3; LRMS(ESI) *m/z* for C<sub>82</sub>H<sub>109</sub>NO<sub>9</sub> [M + Na]<sup>+</sup> calcd: 1274.80, found: 1274.60.

**Synthesis of S24{n17/i17}**, (R,Z)-3-(benzyloxy)-N-((2S,3R)-3-(benzyloxy)-1-(((2S,3R,4S,5S,6R)-3,4,5-tris(benzyloxy)-6-((benzyloxy)methyl)tetrahydro-2H-pyran-2-yl)oxy)heptadec-4-yn-2-yl)-15-methylhexadec-5-enamide

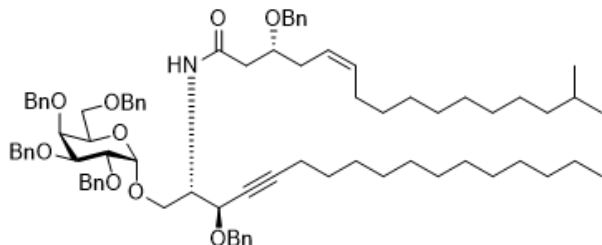

Yield: 58%; <sup>1</sup>H NMR (400 MHz, CDCl<sub>3</sub>, reference peak TMS at 0.00 ppm) δ 7.34–7.19 (m, 30H), 6.62 (d, *J* = 8.8 Hz, 1H), 5.49–5.43 (m, 1H), 5.38–5.32 (m, 1H), 4.89 (d, *J* = 12.0 Hz, 1H), 4.82 (d, *J* = 3.6 Hz, 1H), 4.74–4.68 (m, 3H), 4.60 (t, *J* = 11.2 Hz, 2H), 4.53–4.44 (m, 5H), 4.41–4.35 (m, 2H), 3.98 (dd, *J* = 10.0, 3.6 Hz, 1H), 3.87–3.84 (m, 3H), 3.80–3.72 (m, 3H), 3.46 (dd, *J* = 6.6, 2.0 Hz, 2H), 2.36–2.26 (m, 4H), 2.01 (t, *J* = 6.4 Hz, 2H),

1.97 (q, *J* = 6.8 Hz, 2H), 1.54–1.40 (m, 3H), 1.24 (bs, 30H), 1.15–1.12 (m, 2H), 0.89–0.85 (m, 9H); <sup>13</sup>C NMR (75 MHz, CDCl<sub>3</sub>) δ 171.2, 139.1, 138.9, 138.7, 138.6, 138.2, 138.0, 132.9, 128.6, 128.5, 128.4, 128.4, 128.4, 128.2, 128.1, 128.0, 127.9, 127.8, 127.7, 127.6, 127.5, 124.6, 98.8, 89.1, 79.1, 76.7, 75.8, 75.0, 74.9, 73.2, 71.7, 70.7, 69.7, 69.0, 68.7, 67.6, 52.5, 41.7, 39.3, 32.1, 31.9, 30.2, 29.9, 29.9, 29.8, 29.8, 29.6, 29.6, 29.4, 29.2, 28.9, 28.2, 27.7, 27.6, 22.9, 22.9, 18.9, 14.3; LRMS(ESI) *m/z* for C<sub>82</sub>H<sub>109</sub>NO<sub>9</sub> [M + Na]<sup>+</sup> calcd: 1274.80, found: 1274.60

**Synthesis of S24{n17/a17}**, (3R,Z)-3-(benzyloxy)-N-((2S,3R)-3-(benzyloxy)-1-(((2S,3R,4S,5S,6R)-3,4,5-tris(benzyloxy)-6-((benzyloxy)methyl)tetrahydro-2H-pyran-2-yl)oxy)heptadec-4-yn-2-yl)-14-methylhexadec-5-enamide

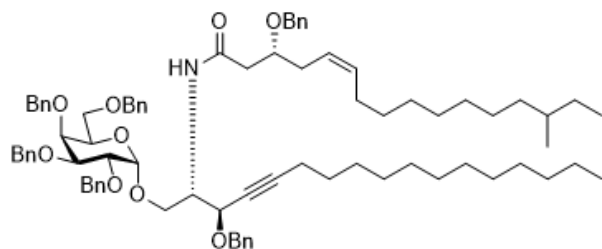

Yield: 62%; <sup>1</sup>H NMR (400 MHz, CDCl<sub>3</sub>, reference peak TMS at 0.00 ppm) δ 7.38–7.16 (m, 30H), 6.62 (d, *J* = 8.4 Hz, 1H), 5.49–5.42 (m, 1H), 5.38–5.31 (m, 1H), 4.89 (d, *J* = 12.0 Hz, 1H), 4.81 (d, *J* = 3.2 Hz, 1H), 4.74–4.68 (m, 3H), 4.60 (t, *J* = 11.2 Hz, 2H), 4.53–4.43 (m, 5H), 4.40–4.35 (m, 2H), 3.98 (dd, *J* = 10.0, 3.2 Hz, 1H), 3.86–3.84 (m, 3H), 3.80–3.74 (m, 3H), 3.44 (d, *J* = 5.6 Hz, 2H), 2.36–2.24 (m, 4H), 2.09 (t, *J* = 6.8 Hz, 2H), 1.97 (q, *J* = 6.8 Hz, 2H), 1.44 (quint, *J* = 7.2 Hz, 2H), 1.24 (bs, 31H), 1.15–

1.08 (m, 2H), 0.89–0.83 (m, 9H); <sup>13</sup>C NMR (100 MHz, CDCl<sub>3</sub>) δ 171.2, 139.1, 138.9, 138.7, 138.6, 138.2, 138.0, 132.9, 128.6, 128.5, 128.4, 128.4, 128.4, 128.2, 128.1, 128.0, 127.9, 127.8, 127.8, 127.7, 127.6, 127.5, 124.6, 98.8, 89.0, 79.1, 76.8, 76.7, 75.8, 75.0, 74.9, 73.6, 73.5, 73.2, 71.7, 70.7, 69.7, 69.0, 68.7, 67.6, 52.5, 41.7, 36.9, 34.6, 32.1, 31.9, 30.2, 29.9, 29.9, 29.8, 29.7, 29.6, 29.6, 29.4, 29.2, 28.9, 27.7, 27.3, 22.9, 19.4, 18.9, 14.3, 11.6; LRMS(ESI) *m/z* for C<sub>82</sub>H<sub>109</sub>NO<sub>9</sub> [M + Na]<sup>+</sup> calcd: 1274.80, found: 1274.60.

## General procedure of benzyl deprotection and triple bond reduction via catalytic hydrogenation

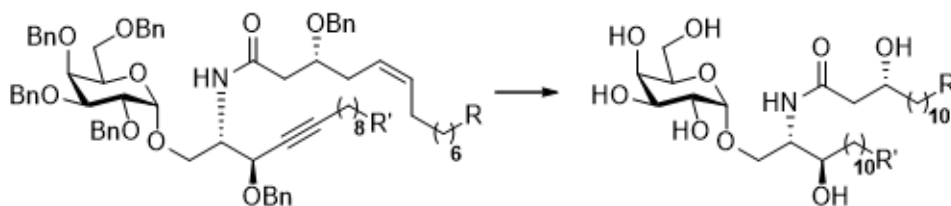

To a solution of **S24** (1.0 equiv.) in MeOH/DCM (1.5/0.5 mL) was added Pd(OH)<sub>2</sub>/C (100 wt%) and the reaction mixture was stirred under H<sub>2</sub> atmosphere (1 atm) for 10 hr. After the completion of reaction monitored by TLC, catalyst was removed by filtration through 0.45 μm PTFE syringe filter and washed with MeOH/DCM (3:1, v/v) solution. The resulting filtrate was concentrated under reduced pressure to provide desired products as white solid.

### Synthesis of **SB2201**, (R)-3-hydroxy-N-((2S,3R)-3-hydroxy-1-(((2S,3R,4S,5R,6R)-3,4,5-trihydroxy-6-(hydroxymethyl)tetrahydro-2H-pyran-2-yl)oxy)octadecan-2-yl)hexadecanamide

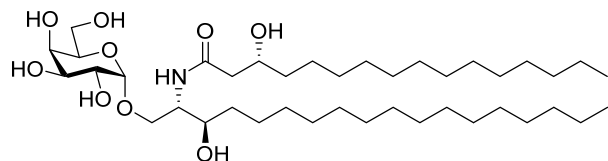

Yield: quantitative; <sup>1</sup>H NMR (600 MHz, CDCl<sub>3</sub>:CD<sub>3</sub>OD = 1:1, reference peak CD<sub>3</sub>OD at 0.00 ppm) δ 4.85 (d, *J* = 3.6 Hz, 1H), 3.99–3.97 (m, 2H), 3.93–3.92 (m, 1H), 3.87–3.68 (m, 7H), 3.64–3.61 (m, 1H), 2.40–2.28 (m, 2H), 1.55–1.41 (m, 6H), 1.35–1.27 (m, 46H), 0.90–0.86 (m, 6H); <sup>13</sup>C NMR (125 MHz,

CDCl<sub>3</sub>:CD<sub>3</sub>OD = 1:1, reference peak CD<sub>3</sub>OD at 49.0 ppm) δ 173.6, 100.4, 71.6, 71.5, 70.9, 70.4, 69.8, 69.3, 68.0, 62.3, 54.4, 44.4, 37.9, 34.6, 32.6, 30.3, 30.3, 30.0, 26.5, 26.2, 23.3, 14.4; LRMS(ESI) *m/z* for C<sub>40</sub>H<sub>79</sub>NaNO<sub>9</sub> [M + Na]<sup>+</sup> calcd: 740.56, found: 740.60.

### Synthesis of **SB2202**, (R)-3-hydroxy-N-((2S,3R)-3-hydroxy-1-(((2S,3R,4S,5R,6R)-3,4,5-trihydroxy-6-(hydroxymethyl)tetrahydro-2H-pyran-2-yl)oxy)octadecan-2-yl)pentadecanamide

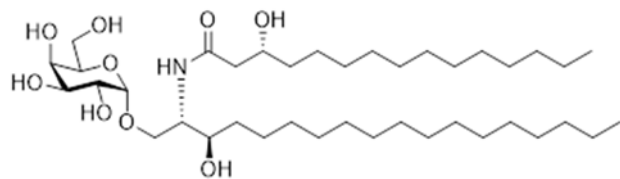

Yield: quantitative; <sup>1</sup>H NMR (600 MHz, CD<sub>3</sub>OD/CDCl<sub>3</sub> (1:1, v/v), reference peak TMS at 0.00 ppm): δ 4.85 (d, *J* = 3.6 Hz, 1H), 4.00–3.96 (m, 2H), 3.93–3.92 (m, 1H), 3.87–3.68 (m, 7H), 3.63 (t, *J* = 6.9 Hz, 1H), 2.40–2.37 (m, 1H), 2.32–2.28 (m, 1H), 1.55–1.41 (m, 4H), 1.35–1.27 (m, 46H), 0.89 (t, *J* = 6.9 Hz, 6H); <sup>13</sup>C NMR (150 MHz, CD<sub>3</sub>OD/CDCl<sub>3</sub> (1:1, v/v), reference

peak CD<sub>3</sub>OD at 49.00 ppm): δ 173.6, 100.3, 71.6, 71.4, 70.8, 70.3, 69.7, 69.2, 67.9, 62.2, 54.3, 44.3, 37.9, 34.5, 32.5, 30.3, 30.2, 29.9, 26.4, 26.2, 23.2, 14.3; LRMS(ESI) *m/z* for C<sub>39</sub>H<sub>77</sub>NaNO<sub>9</sub> [M + Na]<sup>+</sup> calcd: 726.55, found: 726.60.

### Synthesis of **SB2203**, (R)-3-hydroxy-N-((2S,3R)-3-hydroxy-1-(((2S,3R,4S,5R,6R)-3,4,5-trihydroxy-6-(hydroxymethyl)tetrahydro-2H-pyran-2-yl)oxy)octadecan-2-yl)-15-methylhexadecanamide

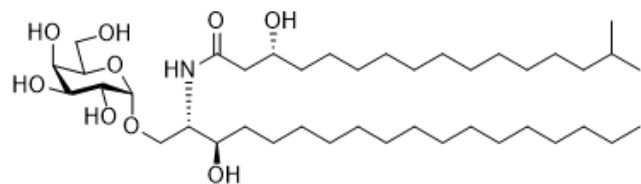

Yield: quantitative; <sup>1</sup>H NMR (600 MHz, CDCl<sub>3</sub>:CD<sub>3</sub>OD = 1:1, reference peak CD<sub>3</sub>OD at 0.00 ppm) δ 4.85 (d, *J* = 4.2 Hz, 1H), 4.00–3.95 (m, 2H), 3.92 (dd, *J* = 3.0, 1.2 Hz, 1H), 3.86 (dd, *J* = 10.2, 3.0 Hz, 1H), 3.83 (t, *J* = 6.6 Hz, 1H), 3.80–3.72 (m, 4H), 3.69 (dd, *J* = 10.2, 4.8 Hz, 1H), 3.63 (td, *J* = 7.5, 2.4 Hz, 1H), 2.38 (dd, *J* = 14.4, 3.0 Hz, 1H), 2.30 (dd, *J* = 14.4, 7.8 Hz, 1H), 1.56–1.13 (m, 5H), 1.27 (bs, 44H), 1.16 (q, *J* = 7.2 Hz, 2H), 0.88 (dd, *J* = 15.0, 6.6 Hz, 9H); <sup>13</sup>C NMR

(125 MHz, CDCl<sub>3</sub>:CD<sub>3</sub>OD = 1:1, reference peak CD<sub>3</sub>OD at 49.0 ppm)  $\delta$  173.5, 100.2, 71.6, 70.8, 70.3, 69.7, 69.2, 67.9, 62.2, 54.3, 44.3, 39.6, 37.8, 34.5, 32.5, 30.9, 30.5, 30.2, 29.9, 28.5, 28.0, 26.4, 26.1, 23.2, 22.9, 14.3; LRMS(ESI)  $m/z$  for C<sub>41</sub>H<sub>81</sub>NaNO<sub>9</sub> [M + Na]<sup>+</sup> calcd: 754.58, found: 754.60.

**Synthesis of SB2204,** (3R)-3-hydroxy-N-((2S,3R)-3-hydroxy-1-(((2S,3R,4S,5R,6R)-3,4,5-trihydroxy-6-(hydroxymethyl)tetrahydro-2H-pyran-2-yl)oxy)octadecan-2-yl)-14-methylhexadecanamide

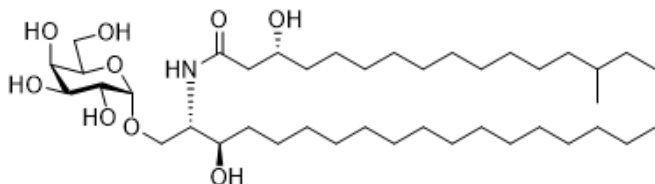

Yield: quantitative; <sup>1</sup>H NMR (600 MHz, CD<sub>3</sub>OD/CDCl<sub>3</sub> (1:1, v/v), reference peak TMS at 0.00 ppm):  $\delta$  4.85 (d,  $J$  = 3.0 Hz, 1H), 4.00–3.96 (m, 2H), 3.93–3.92 (m, 1H), 3.87–3.68 (m, 7H), 3.64–3.61 (m, 1H), 2.40–2.37 (m, 1H), 2.32–2.28 (m, 1H), 1.55–1.41 (m, 7H), 1.36–1.27 (m, 42H), 1.17–1.11 (m, 2H), 0.90–0.84 (m, 9H); <sup>13</sup>C NMR (150 MHz, CD<sub>3</sub>OD/CDCl<sub>3</sub> (1:1, v/v), reference peak

CD<sub>3</sub>OD at 49.00 ppm):  $\delta$  173.5, 100.2, 71.5, 70.3, 69.6, 69.2, 62.2, 54.3, 44.2, 37.8, 37.2, 35.0, 34.5, 32.4, 30.5, 30.2, 30.0, 29.9, 27.6, 26.4, 26.1, 23.2, 19.4, 14.3, 11.6; LRMS(ESI)  $m/z$  for C<sub>41</sub>H<sub>81</sub>NaNO<sub>9</sub> [M + Na]<sup>+</sup> calcd: 754.58, found: 754.60.

**Synthesis of SB2205,** (R)-3-hydroxy-N-((2S,3R)-3-hydroxy-1-(((2S,3R,4S,5R,6R)-3,4,5-trihydroxy-6-(hydroxymethyl)tetrahydro-2H-pyran-2-yl)oxy)nonadecan-2-yl)hexadecanamide

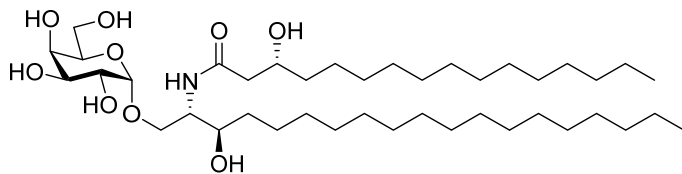

Yield: quantitative; <sup>1</sup>H NMR (600 MHz, CDCl<sub>3</sub>:CD<sub>3</sub>OD = 1:1, reference peak CD<sub>3</sub>OD at 0.00 ppm)  $\delta$  4.85 (d,  $J$  = 3.6 Hz, 1H), 4.01–3.97 (m, 2H), 3.93–3.92 (m, 1H), 3.87–3.68 (m, 7H), 3.64–3.61 (m, 1H), 2.40–2.28 (m, 2H), 1.56–1.40 (m, 7H), 1.35–1.27 (m, 47H), 0.90–0.85 (m, 6H); <sup>13</sup>C NMR (125 MHz, CDCl<sub>3</sub>:CD<sub>3</sub>OD = 1:1,

reference peak CD<sub>3</sub>OD at 49.0 ppm)  $\delta$  173.6, 100.4, 71.7, 70.9, 70.4, 69.8, 69.3, 68.0, 62.3, 54.4, 44.4, 37.9, 34.6, 32.6, 30.3, 30.3, 30.0, 26.3, 26.2, 23.3, 14.4; LRMS(ESI)  $m/z$  for C<sub>41</sub>H<sub>81</sub>NaNO<sub>9</sub> [M + Na]<sup>+</sup> calcd: 754.58, found: 754.60.

**Synthesis of SB2206,** (R)-3-hydroxy-N-((2S,3R)-3-hydroxy-1-(((2S,3R,4S,5R,6R)-3,4,5-trihydroxy-6-(hydroxymethyl)tetrahydro-2H-pyran-2-yl)oxy)nonadecan-2-yl)pentadecanamide

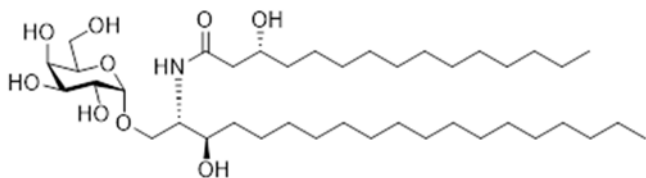

Yield: quantitative; <sup>1</sup>H NMR (600 MHz, CD<sub>3</sub>OD/CDCl<sub>3</sub> (1:1, v/v), reference peak TMS at 0.00 ppm):  $\delta$  4.85 (d,  $J$  = 3.6 Hz, 1H), 4.00–3.96 (m, 2H), 3.93–3.92 (m, 1H), 3.87–3.68 (m, 7H), 3.63 (t,  $J$  = 6.9 Hz, 1H), 2.40–2.37 (m, 1H), 2.32–2.28 (m, 1H), 1.55–1.41 (m, 4H), 1.38–1.27 (m, 48H), 0.89 (t,  $J$  = 6.9 Hz, 6H); <sup>13</sup>C NMR (150 MHz, CD<sub>3</sub>OD/CDCl<sub>3</sub> (1:1,

v/v), reference peak CD<sub>3</sub>OD at 49.00 ppm):  $\delta$  173.6, 100.3, 71.5, 71.4, 70.8, 70.3, 69.7, 69.2, 67.9, 62.2, 54.3, 44.3, 37.9, 34.5, 32.5, 30.2, 30.2, 29.9, 26.4, 26.2, 23.2, 14.3; LRMS(ESI)  $m/z$  for C<sub>40</sub>H<sub>79</sub>NaNO<sub>9</sub> [M + Na]<sup>+</sup> calcd: 740.56, found: 740.60.

**Synthesis of SB2207,** (R)-3-hydroxy-N-((2S,3R)-3-hydroxy-1-(((2S,3R,4S,5R,6R)-3,4,5-trihydroxy-6-(hydroxymethyl)tetrahydro-2H-pyran-2-yl)oxy)nonadecan-2-yl)-15-methylhexadecanamide

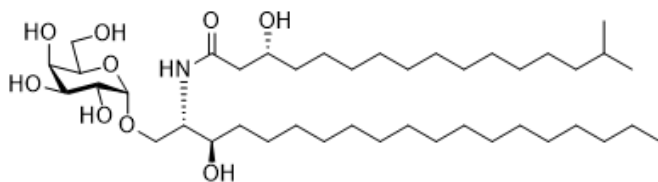

Yield: quantitative;  $^1\text{H}$  NMR (600 MHz,  $\text{CDCl}_3:\text{CD}_3\text{OD} = 1:1$ , reference peak  $\text{CD}_3\text{OD}$  at 0.00 ppm)  $\delta$  4.85 (d,  $J = 3.6$  Hz, 1H), 4.00–3.96 (m, 2H), 3.91 (dd,  $J = 2.4, 1.2$  Hz, 1H), 3.86 (dd,  $J = 10.8, 3.6$  Hz, 1H), 3.83 (t,  $J = 6.6$  Hz, 1H), 3.80–3.76 (m, 2H), 3.75–3.72 (m, 2H), 3.69 (dd,  $J = 10.2, 5.4$  Hz, 1H), 3.63 (td,  $J = 8.1, 3.0$  Hz, 1H), 2.39 (dd,  $J = 14.4, 3.0$  Hz, 1H), 2.30 (dd,  $J = 14.4, 9.0$  Hz, 1H), 1.56–1.46 (m, 5H), 1.27 (bs, 46H), 1.16 (q,  $J = 7.2$  Hz, 2H), 0.88 (dd,  $J = 14.4, 6.6$  Hz, 9H);  $^{13}\text{C}$  NMR (125 MHz,  $\text{CDCl}_3:\text{CD}_3\text{OD} = 1:1$ , reference peak  $\text{CD}_3\text{OD}$  at 49.0 ppm)  $\delta$  173.5, 100.2, 71.4, 70.7, 70.2, 69.6, 69.2, 67.8, 62.1, 54.2, 44.2, 39.6, 37.8, 34.5, 32.4, 30.9, 30.4, 30.2, 29.8, 28.4, 27.9, 26.3, 26.1, 23.1, 22.8, 14.3; LRMS(ESI)  $m/z$  for  $\text{C}_{42}\text{H}_{83}\text{NaNO}_9$  [ $\text{M} + \text{Na}$ ] $^+$  calcd: 768.60, found: 768.65.

**Synthesis of SB2208,** (3R)-3-hydroxy-N-((2S,3R)-3-hydroxy-1-(((2S,3R,4S,5R,6R)-3,4,5-trihydroxy-6-(hydroxymethyl)tetrahydro-2H-pyran-2-yl)oxy)nonadecan-2-yl)-14-methylhexadecanamide

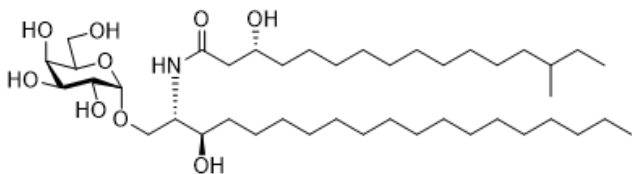

Yield: quantitative;  $^1\text{H}$  NMR (600 MHz,  $\text{CD}_3\text{OD}/\text{CDCl}_3$  (1:1, v/v), reference peak TMS at 0.00 ppm):  $\delta$  4.85 (d,  $J = 3.0$  Hz, 1H), 4.00–3.96 (m, 2H), 3.93–3.92 (m, 1H), 3.87–3.68 (m, 7H), 3.64–3.61 (m, 1H), 2.40–2.37 (m, 1H), 2.32–2.28 (m, 1H), 1.55–1.43 (m, 7H), 1.36–1.27 (m, 44H), 1.17–1.11 (m, 2H), 0.90–0.84 (m, 9H);  $^{13}\text{C}$  NMR (150 MHz,  $\text{CD}_3\text{OD}/\text{CDCl}_3$  (1:1, v/v), reference peak  $\text{CD}_3\text{OD}$  at 49.00 ppm):  $\delta$  173.5, 100.2, 71.5, 70.7, 70.2, 69.9, 69.2, 62.1, 54.2, 44.2, 37.8, 37.1, 34.9, 34.5, 32.4, 30.5, 30.2, 30.1, 30.0, 29.8, 27.6, 26.3, 26.1, 23.1, 19.4, 14.3, 11.6; LRMS(ESI)  $m/z$  for  $\text{C}_{42}\text{H}_{83}\text{NaNO}_9$  [ $\text{M} + \text{Na}$ ] $^+$  calcd: 768.60, found: 768.65.

**Synthesis of SB2209,** (R)-3-hydroxy-N-((2S,3R)-3-hydroxy-15-methyl-1-(((2S,3R,4S,5R,6R)-3,4,5-trihydroxy-6-(hydroxymethyl)tetrahydro-2H-pyran-2-yl)oxy)hexadecan-2-yl)hexadecanamide

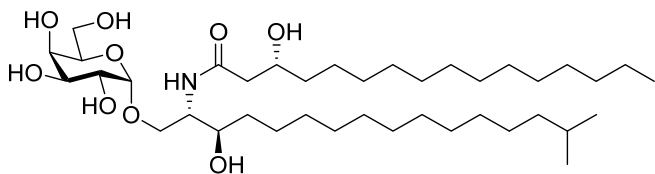

Yield: quantitative;  $^1\text{H}$  NMR (600 MHz,  $\text{CD}_3\text{OD}/\text{CDCl}_3$  (1:1, v/v), reference peak TMS at 0.00 ppm):  $\delta$  4.85 (d,  $J = 3.6$  Hz, 1H), 4.00–3.96 (m, 2H), 3.93–3.92 (m, 1H), 3.87–3.68 (m, 7H), 3.64–3.61 (m, 1H), 2.40–2.28 (m, 2H), 1.56–1.40 (m, 7H), 1.35–1.27 (m, 38H), 1.18–1.14 (m, 2H), 0.90–0.86 (m, 9H);  $^{13}\text{C}$  NMR (150 MHz,  $\text{CD}_3\text{OD}/\text{CDCl}_3$  (1:1, v/v), reference peak  $\text{CD}_3\text{OD}$  at 49.00 ppm):  $\delta$  173.7, 100.4, 78.5, 78.3, 78.1, 71.6, 70.9, 70.4, 69.8, 69.3, 62.3, 54.4, 44.4, 39.7, 38.0, 34.6, 32.6, 30.6, 30.4, 30.3, 30.0, 28.6, 28.1, 26.5, 26.2, 23.3, 23.0, 14.4; LRMS(ESI)  $m/z$  for  $\text{C}_{39}\text{H}_{77}\text{NaNO}_9$  [ $\text{M} + \text{Na}$ ] $^+$  calcd: 726.55, found: 726.60.

**Synthesis of SB2210,** (R)-3-hydroxy-N-((2S,3R)-3-hydroxy-15-methyl-1-(((2S,3R,4S,5R,6R)-3,4,5-trihydroxy-6-(hydroxymethyl)tetrahydro-2H-pyran-2-yl)oxy)hexadecan-2-yl)pentadecanamide

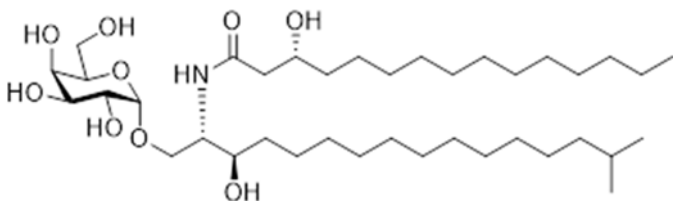

Yield: quantitative;  $^1\text{H}$  NMR (600 MHz,  $\text{CD}_3\text{OD}/\text{CDCl}_3$  (1:1, v/v), reference peak TMS at 0.00 ppm):  $\delta$  4.85 (d,  $J = 3.6$  Hz, 1H), 4.00–3.96 (m, 2H), 3.93–3.92 (m, 1H), 3.87–3.68 (m, 7H), 3.63 (t,  $J = 6.9$  Hz, 1H), 2.40–2.37 (m, 1H), 2.32–2.28 (m, 1H), 1.55–1.41 (m, 5H), 1.35–1.27 (m, 38H), 1.18–1.14 (m, 2H), 0.90–0.86 (m, 9H);  $^{13}\text{C}$  NMR

(150 MHz, CD<sub>3</sub>OD/CDCl<sub>3</sub> (1:1, v/v), reference peak CD<sub>3</sub>OD at 49.00 ppm):  $\delta$  173.6, 100.3, 71.5, 71.4, 70.8, 70.3, 69.7, 69.2, 67.9, 62.2, 54.3, 44.3, 39.6, 37.9, 34.5, 32.5, 30.5, 30.3, 30.2, 30.2, 30.2, 29.9, 28.5, 28.0, 26.4, 26.1, 23.2, 22.9, 14.3; LRMS(ESI)  $m/z$  for C<sub>38</sub>H<sub>75</sub>NaNO<sub>9</sub> [M + Na]<sup>+</sup> calcd: 712.53, found: 712.60.

**Synthesis of SB2211**, (R)-3-hydroxy-*N*-((2S,3R)-3-hydroxy-15-methyl-1-(((2S,3R,4S,5R,6R)-3,4,5-trihydroxy-6-(hydroxymethyl)tetrahydro-2H-pyran-2-yl)oxy)hexadecan-2-yl)-15-methylhexadecanamide

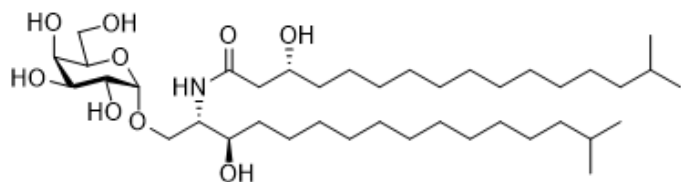

Yield: quantitative; <sup>1</sup>H NMR (600 MHz, CDCl<sub>3</sub>:CD<sub>3</sub>OD = 1:1, reference peak CD<sub>3</sub>OD at 0.00 ppm)  $\delta$  4.85 (d,  $J$  = 3.0 Hz, 1H), 4.00–3.96 (m, 2H), 3.92 (d,  $J$  = 3.0 Hz, 1H), 3.86 (dd,  $J$  = 10.2, 2.4 Hz, 1H), 3.83 (t,  $J$  = 6.0 Hz, 1H), 3.80–3.76 (m, 2H), 3.75–3.72 (m, 2H), 3.71–3.68 (m, 1H), 3.62 (td,  $J$  = 7.8, 2.4 Hz, 1H), 2.38 (dd,  $J$  = 14.4, 3.6 Hz, 1H), 2.30 (dd,  $J$  = 14.4, 8.4 Hz, 1H), 1.56–1.46 (m, 6H),

1.28 (bs, 36H), 1.16 (q,  $J$  = 6.6 Hz, 4H), 0.87 (d,  $J$  = 6.6 Hz, 12H); <sup>13</sup>C NMR (125 MHz, CDCl<sub>3</sub>:CD<sub>3</sub>OD = 1:1, reference peak CD<sub>3</sub>OD at 49.0 ppm)  $\delta$  173.6, 100.3, 71.6, 71.4, 70.8, 70.3, 69.7, 69.2, 67.9, 62.2, 54.3, 44.3, 39.7, 37.9, 32.5, 30.5, 30.3, 30.3, 30.2, 30.2, 28.5, 28.0, 26.4, 26.2, 22.9; LRMS(ESI)  $m/z$  for C<sub>40</sub>H<sub>79</sub>NaNO<sub>9</sub> [M + Na]<sup>+</sup> calcd: 740.56, found: 740.60.

**Synthesis of SB2212**, (3R)-3-hydroxy-*N*-((2S,3R)-3-hydroxy-15-methyl-1-(((2S,3R,4S,5R,6R)-3,4,5-trihydroxy-6-(hydroxymethyl)tetrahydro-2H-pyran-2-yl)oxy)hexadecan-2-yl)-14-methylhexadecanamide

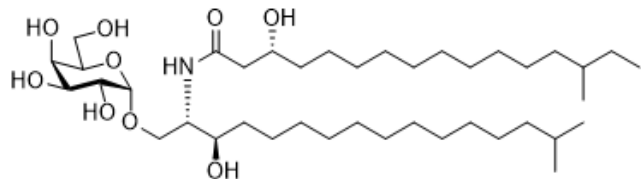

Yield: quantitative; <sup>1</sup>H NMR (600 MHz, CDCl<sub>3</sub>:CD<sub>3</sub>OD = 1:1, reference peak CD<sub>3</sub>OD at 0.00 ppm)  $\delta$  4.85 (d,  $J$  = 3.0 Hz, 1H), 4.00–3.96 (m, 2H), 3.92 (dd,  $J$  = 2.7, 1.8 Hz, 1H), 3.86 (dd,  $J$  = 10.2, 3.0 Hz, 1H), 3.83 (t,  $J$  = 6.0 Hz, 1H), 3.80–3.76 (m, 2H), 3.75–3.72 (m, 2H), 3.71–3.68 (m, 1H), 3.63 (td,  $J$  = 7.8, 2.4 Hz, 1H), 2.38 (dd,  $J$  = 13.8, 3.6 Hz, 1H), 2.30 (dd,  $J$  = 14.4, 8.4 Hz, 1H), 1.56–1.44 (m, 6H), 1.27 (bs, 36H), 1.16

(q,  $J$  = 7.2 Hz, 4H), 0.90–0.84 (m, 12H); <sup>13</sup>C NMR (150 MHz, CDCl<sub>3</sub>:CD<sub>3</sub>OD = 1:1, reference peak CD<sub>3</sub>OD at 49.0 ppm)  $\delta$  173.5, 100.2, 71.5, 70.7, 70.2, 69.6, 69.2, 62.2, 54.3, 44.2, 39.6, 37.8, 37.2, 35.0, 34.5, 30.5, 30.4, 30.2, 30.2, 30.0, 28.5, 27.9, 27.6, 26.4, 26.1, 23.1, 22.8, 19.4, 11.6; LRMS(ESI)  $m/z$  for C<sub>40</sub>H<sub>79</sub>NaNO<sub>9</sub> [M + Na]<sup>+</sup> calcd: 740.56, found: 740.60.

**Synthesis of SB2213**, (3R)-3-hydroxy-*N*-((2S,3R)-3-hydroxy-14-methyl-1-(((2S,3R,4S,5R,6R)-3,4,5-trihydroxy-6-(hydroxymethyl)tetrahydro-2H-pyran-2-yl)oxy)hexadecan-2-yl)hexadecanamide

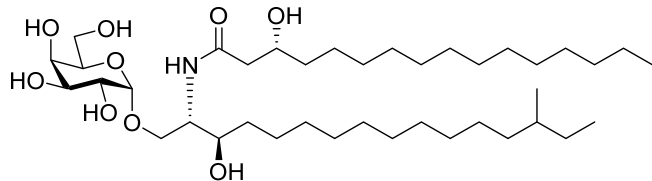

Yield: quantitative; <sup>1</sup>H NMR (600 MHz, CD<sub>3</sub>OD/CDCl<sub>3</sub> (1:1, v/v), reference peak TMS at 0.00 ppm):  $\delta$  4.85–4.83 (m, 1H), 3.99–3.96 (m, 2H), 3.93–3.92 (m, 1H), 3.87–3.68 (m, 6H), 3.62 (m, 1H), 2.40–2.28 (m, 2H), 1.55–1.41 (m, 6H), 1.37–1.27 (m, 38H), 1.15–1.14 (m, 2H), 0.90–0.84 (m, 9H); <sup>13</sup>C NMR (150 MHz, CD<sub>3</sub>OD/CDCl<sub>3</sub> (1:1, v/v), reference

peak CD<sub>3</sub>OD at 49.00 ppm);  $\delta$  173.7, 100.4, 71.6, 70.9, 70.4, 69.8, 69.3, 62.3, 54.4, 44.4, 38.0, 37.3, 35.1, 34.6, 32.6, 30.7, 30.4, 30.3, 30.3, 30.1, 30.0, 27.8, 26.5, 26.2, 23.3, 19.6, 14.4, 11.7; LRMS(ESI)  $m/z$  for C<sub>39</sub>H<sub>77</sub>NaNO<sub>9</sub> [M + Na]<sup>+</sup> calcd: 726.55, found: 726.60.

**Synthesis of SB2214**, (3R)-3-hydroxy-N-((2S,3R)-3-hydroxy-14-methyl-1-(((2S,3R,4S,5R,6R)-3,4,5-trihydroxy-6-(hydroxymethyl)tetrahydro-2H-pyran-2-yl)oxy)hexadecan-2-yl)pentadecanamide

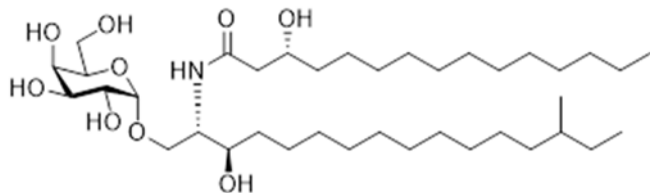

Yield: quantitative;  $^1\text{H}$  NMR (600 MHz,  $\text{CD}_3\text{OD}/\text{CDCl}_3$  (1:1, v/v), reference peak TMS at 0.00 ppm):  $\delta$  4.85 (d,  $J = 3.6$  Hz, 1H), 4.00–3.96 (m, 2H), 3.93–3.92 (m, 1H), 3.87–3.68 (m, 7H), 3.63 (t,  $J = 6.9$  Hz, 1H), 2.40–2.37 (m, 1H), 2.32–2.28 (m, 1H), 1.55–1.43 (m, 7H), 1.36–1.28 (m, 36H), 1.15–1.08 (m, 2H), 0.93–0.84 (m, 9H);  $^{13}\text{C}$  NMR (150 MHz,

$\text{CD}_3\text{OD}/\text{CDCl}_3$  (1:1, v/v), reference peak  $\text{CD}_3\text{OD}$  at 49.00 ppm):  $\delta$  173.6, 100.3, 71.6, 71.4, 70.8, 70.3, 69.7, 69.2, 67.9, 62.2, 54.3, 44.3, 37.9, 37.2, 35.0, 34.5, 32.5, 30.6, 30.3, 30.3, 30.2, 30.2, 30.0, 29.9, 27.7, 26.4, 26.2, 23.2, 19.5, 14.3, 11.6; LRMS(ESI)  $m/z$  for  $\text{C}_{38}\text{H}_{75}\text{NaNO}_9$  [ $\text{M} + \text{Na}$ ] $^+$  calcd: 712.53, found: 712.60.

**Synthesis of SB2215**, (3R)-3-hydroxy-N-((2S,3R)-3-hydroxy-14-methyl-1-(((2S,3R,4S,5R,6R)-3,4,5-trihydroxy-6-(hydroxymethyl)tetrahydro-2H-pyran-2-yl)oxy)hexadecan-2-yl)-15-methylhexadecanamide

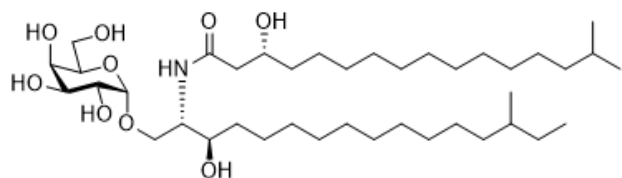

Yield: quantitative;  $^1\text{H}$  NMR (600 MHz,  $\text{CDCl}_3:\text{CD}_3\text{OD} = 1:1$ , reference peak  $\text{CD}_3\text{OD}$  at 0.00 ppm)  $\delta$  4.85 (d,  $J = 3.0$  Hz, 1H), 4.01–3.96 (m, 2H), 3.93 (d,  $J = 1.8$  Hz, 1H), 3.86 (dd,  $J = 10.2, 2.4$  Hz, 1H), 3.83 (t,  $J = 6.0$  Hz, 1H), 3.78–3.72 (m, 4H), 3.71–3.68 (m, 1H), 3.63 (td,  $J = 8.1, 2.4$  Hz, 1H), 2.39 (dd,  $J = 14.4, 3.6$  Hz, 1H), 2.30 (dd,  $J = 14.4, 9.0$  Hz, 1H),

1.56–1.43 (m, 6H), 1.28 (bs, 36H), 1.18–1.11 (m, 4H), 1.88–1.84 (m, 12H);  $^{13}\text{C}$  NMR (125 MHz,  $\text{CDCl}_3:\text{CD}_3\text{OD} = 1:1$ , reference peak  $\text{CD}_3\text{OD}$  at 49.0 ppm)  $\delta$  173.5, 100.2, 71.5, 70.7, 70.2, 69.6, 69.2, 62.1, 54.2, 39.6, 37.8, 37.2, 34.9, 37.8, 37.2, 34.9, 30.5, 30.4, 30.2, 30.1, 30.0, 28.5, 27.9, 27.6, 26.4, 26.1, 22.8, 19.4, 11.6; LRMS(ESI)  $m/z$  for  $\text{C}_{40}\text{H}_{79}\text{NaNO}_9$  [ $\text{M} + \text{Na}$ ] $^+$  calcd: 740.56, found: 740.60.

**Synthesis of SB2216**, (3R)-3-hydroxy-N-((2S,3R)-3-hydroxy-14-methyl-1-(((2S,3R,4S,5R,6R)-3,4,5-trihydroxy-6-(hydroxymethyl)tetrahydro-2H-pyran-2-yl)oxy)hexadecan-2-yl)-14-methylhexadecanamide

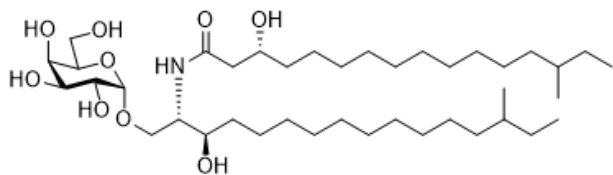

Yield: quantitative;  $^1\text{H}$  NMR (600 MHz,  $\text{CDCl}_3:\text{CD}_3\text{OD} = 1:1$ , reference peak  $\text{CD}_3\text{OD}$  at 0.00 ppm)  $\delta$  4.85 (d,  $J = 3.0$  Hz, 1H), 4.00–3.96 (m, 2H), 3.92 (dd,  $J = 3.0, 1.2$  Hz, 1H), 3.86 (dd,  $J = 10.2, 3.0$  Hz, 1H), 3.83 (t,  $J = 6.0$  Hz, 1H), 3.80–3.76 (m, 2H), 3.75–3.72 (m, 2H), 3.71–3.68 (m, 1H), 3.63 (td,  $J = 7.8, 2.4$  Hz, 1H), 2.38 (dd,  $J = 13.8, 3.6$  Hz, 1H), 2.30 (dd,  $J = 14.4, 9.0$  Hz,

1H), 1.55–1.51 (m, 2H), 1.50–1.44 (m, 4H), 1.27 (bs, 36H), 1.17–1.08 (m, 4H), 0.90–0.84 (m, 12H);  $^{13}\text{C}$  NMR (150 MHz,  $\text{CDCl}_3:\text{CD}_3\text{OD} = 1:1$ , reference peak  $\text{CD}_3\text{OD}$  at 49.0 ppm)  $\delta$  173.5, 100.2, 71.5, 70.7, 70.2, 69.6, 69.2, 62.1, 54.3, 44.2, 37.8, 37.2, 34.9, 34.5, 32.4, 30.5, 30.2, 30.2, 30.1, 27.6, 26.4, 26.1, 23.1, 19.4, 11.6; LRMS(ESI)  $m/z$  for  $\text{C}_{40}\text{H}_{79}\text{NaNO}_9$  [ $\text{M} + \text{Na}$ ] $^+$  calcd: 740.56, found: 740.60.



**Synthesis of SB2217**, (R)-3-hydroxy-N-((2S,3R)-3-hydroxy-15-methyl-1-(((2S,3R,4S,5R,6R)-3,4,5-trihydroxy-6-(hydroxymethyl)tetrahydro-2H-pyran-2-yl)oxy)hexadecan-2-yl)heptadecanamide

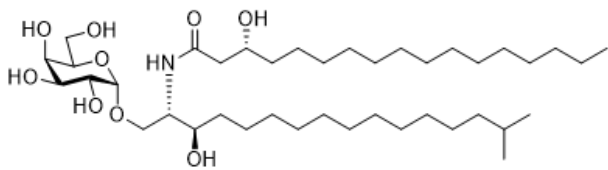

Yield: 98%;  $^1\text{H}$  NMR (400 MHz,  $\text{CD}_3\text{OD}/\text{CDCl}_3$  (1:1, v/v), reference peak TMS at 0.00 ppm):  $\delta$  4.85 (d,  $J = 3.2$  Hz, 1H), 4.00–3.95 (m, 2H), 3.93–3.92 (m, 1H), 3.88–3.67 (m, 7H), 3.64–3.60 (m, 1H), 2.41–2.36 (m, 1H), 2.32–2.26 (m, 1H), 1.57–1.41 (m, 5H), 1.33–1.27 (m, 42H), 1.18–1.13 (m, 2H), 0.90–0.86 (m, 9H);  $^{13}\text{C}$  NMR (100 MHz,  $\text{CD}_3\text{OD}/\text{CDCl}_3$  (1:1,

v/v), reference peak  $\text{CD}_3\text{OD}$  at 49.00 ppm):  $\delta$  173.5, 100.3, 71.5, 71.4, 70.8, 70.3, 69.7, 69.2, 67.9, 62.2, 54.3, 44.3, 39.6, 37.9, 34.5, 32.5, 30.5, 30.2, 30.2, 29.9, 28.5, 28.0, 26.4, 26.1, 23.2, 22.9, 14.3; LRMS(ESI)  $m/z$  for  $\text{C}_{40}\text{H}_{79}\text{NaNO}_9$   $[\text{M} + \text{Na}]^+$  calcd: 740.56, found: 740.60.

**Synthesis of SB2218**, (3R)-3-hydroxy-N-((2S,3R)-3-hydroxy-14-methyl-1-(((2S,3R,4S,5R,6R)-3,4,5-trihydroxy-6-(hydroxymethyl)tetrahydro-2H-pyran-2-yl)oxy)hexadecan-2-yl)heptadecanamide

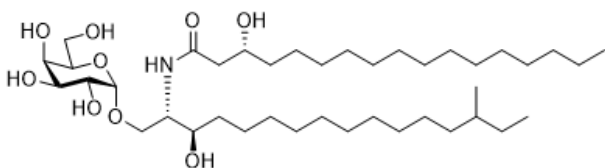

Yield: quantitative;  $^1\text{H}$  NMR (500 MHz,  $\text{CD}_3\text{OD}/\text{CDCl}_3$  (1:1, v/v), reference peak TMS at 0.00 ppm):  $\delta$  4.85–4.84 (m, 1H), 3.99–3.60 (m, 12H), 2.40–2.27 (m, 2H), 1.55–1.39 (m, 6H), 1.36–1.23 (m, 37H), 1.17–1.07 (m, 3H), 0.94–0.80 (m, 9H);  $^{13}\text{C}$  NMR (150 MHz,  $\text{CD}_3\text{OD}/\text{CDCl}_3$  (1:1, v/v), reference peak  $\text{CD}_3\text{OD}$  at 49.00 ppm):  $\delta$  173.5, 100.2, 71.5, 71.3, 70.7, 70.2,

69.6, 69.2, 67.8, 62.1, 54.3, 44.2, 37.8, 37.2, 35.0, 34.5, 32.4, 30.5, 30.2, 30.2, 30.2, 30.0, 29.9, 27.6, 26.4, 26.1, 23.1, 19.4, 14.3, 11.6; LRMS(ESI)  $m/z$  for  $\text{C}_{40}\text{H}_{79}\text{NaNO}_9$   $[\text{M} + \text{Na}]^+$  calcd: 740.56, found: 740.60.

**Synthesis of SB2219**, (R)-3-hydroxy-N-((2S,3R)-3-hydroxy-1-(((2S,3R,4S,5R,6R)-3,4,5-trihydroxy-6-(hydroxymethyl)tetrahydro-2H-pyran-2-yl)oxy)heptadecan-2-yl)heptadecanamide

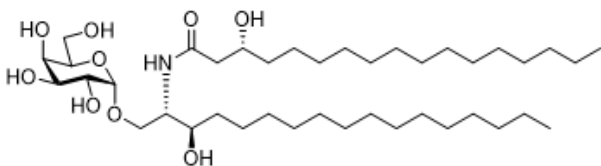

Yield: quantitative;  $^1\text{H}$  NMR (500 MHz,  $\text{CD}_3\text{OD}/\text{CDCl}_3$  (1:1, v/v), reference peak TMS at 0.00 ppm):  $\delta$  4.85 (d,  $J = 3.6$  Hz, 1H), 3.99–3.97 (m, 2H), 3.96–3.92 (m, 1H), 3.87–3.68 (m, 7H), 3.63–3.61 (m, 1H), 2.40–2.27 (m, 2H), 1.55–1.39 (m, 7H), 1.35–1.27 (m, 49H), 0.90–0.85 (m, 6H);  $^{13}\text{C}$  NMR (100 MHz,  $\text{CD}_3\text{OD}/\text{CDCl}_3$  (1:1, v/v), reference peak  $\text{CD}_3\text{OD}$  at 49.00 ppm):

$\delta$  173.5, 100.2, 71.5, 71.3, 70.7, 70.2, 69.6, 69.2, 67.8, 62.1, 54.3, 44.2, 37.8, 34.5, 32.4, 32.4, 30.2, 30.2, 29.9, 26.3, 26.1, 23.1, 14.3; LRMS(ESI)  $m/z$  for  $\text{C}_{40}\text{H}_{79}\text{NaNO}_9$   $[\text{M} + \text{Na}]^+$  calcd: 740.56, found: 740.60.

**Synthesis of SB2220**, (R)-3-hydroxy-N-((2S,3R)-3-hydroxy-1-(((2S,3R,4S,5R,6R)-3,4,5-trihydroxy-6-(hydroxymethyl)tetrahydro-2H-pyran-2-yl)oxy)heptadecan-2-yl)-15-methylhexadecanamide

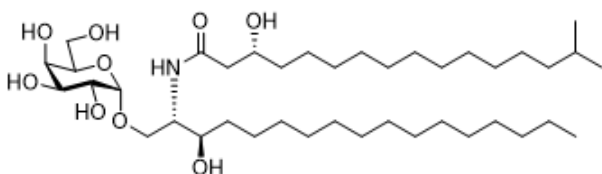

Yield: quantitative;  $^1\text{H}$  NMR (400 MHz,  $\text{CD}_3\text{OD}/\text{CDCl}_3$  (1:1, v/v), reference peak TMS at 0.00 ppm):  $\delta$  4.87 (d,  $J = 3.6$  Hz, 1H), 3.97 (m, 2H), 3.92 (m, 1H), 3.87–3.67 (m, 7H), 3.64–3.60 (m, 1H), 2.40–2.26 (m, 2H), 1.63–1.40 (m, 4H), 1.27 (m, 43H), 1.16–1.13 (m, 2H), 0.94–0.86 (m, 9H);  $^{13}\text{C}$  NMR (100 MHz,  $\text{CD}_3\text{OD}/\text{CDCl}_3$  (1:1, v/v), reference peak  $\text{CD}_3\text{OD}$  at

49.00 ppm):  $\delta$  173.5, 100.2, 71.5, 71.3, 70.7, 70.2, 69.6, 69.2, 62.1, 54.3, 44.2, 39.6, 37.8, 34.5, 30.4, 30.2, 30.2, 29.9, 28.5, 27.9, 26.3, 26.1, 23.2, 22.9, 14.3; LRMS(ESI)  $m/z$  for  $\text{C}_{40}\text{H}_{79}\text{NaNO}_9$   $[\text{M} + \text{Na}]^+$  calcd: 740.56, found: 740.60.

**Synthesis of SB2221**, (3R)-3-hydroxy-N-((2S,3R)-3-hydroxy-1-(((2S,3R,4S,5R,6R)-3,4,5-trihydroxy-6-(hydroxymethyl)tetrahydro-2H-pyran-2-yl)oxy)heptadecan-2-yl)-14-methylhexadecanamide

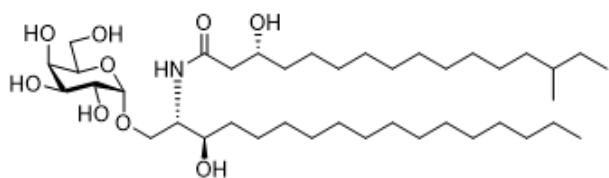

Yield: quantitative;  $^1\text{H}$  NMR (400 MHz,  $\text{CD}_3\text{OD}/\text{CDCl}_3$  (1:1, v/v), reference peak TMS at 0.00 ppm):  $\delta$  4.87–4.83 (m, 1H), 3.97 (m, 2H), 3.92 (m, 1H), 3.87–3.68 (m, 7H), 3.64–3.60 (m, 1H), 2.40–2.20 (m, 2H), 1.61–1.40 (m, 5H), 1.27 (m, 38H), 1.18–1.09 (m, 2H), 0.90–0.84 (m, 9H);  $^{13}\text{C}$  NMR (100 MHz,  $\text{CD}_3\text{OD}/\text{CDCl}_3$  (1:1, v/v), reference peak  $\text{CD}_3\text{OD}$  at 49.00

ppm);  $\delta$  172.8, 99.5, 70.8, 70.6, 70.0, 69.5, 68.9, 68.4, 61.4, 53.5, 43.5, 37.1, 36.4, 34.2, 33.7, 31.7, 29.8, 29.5, 29.4, 29.3, 29.1, 26.9, 25.6, 25.4, 22.4, 18.7, 13.5, 10.9; LRMS(ESI)  $m/z$  for  $\text{C}_{40}\text{H}_{79}\text{NaNO}_9$   $[\text{M} + \text{Na}]^+$  calcd: 740.56, found: 740.60.

**Synthesis of SB2222**, (3R)-3-hydroxy-N-((2S,3R)-3-hydroxy-1-(((2S,3R,4S,5R,6R)-3,4,5-trihydroxy-6-(hydroxymethyl)tetrahydro-2H-pyran-2-yl)oxy)heptadecan-2-yl)-14-methylhexadecanamide

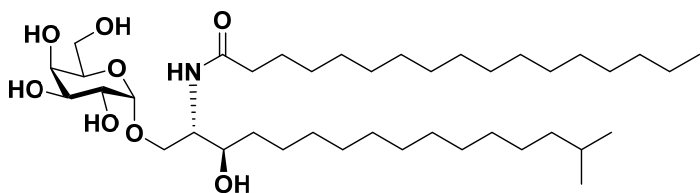

Yield: 74%;  $^1\text{H}$  NMR (500 MHz,  $\text{CD}_3\text{OD}/\text{CDCl}_3$  (1:1, v/v), reference peak TMS at 0.00 ppm):  $\delta$  4.87 (d,  $J$  = 3.75 Hz, 1H), 3.97–3.90 (m, 2H), 3.82–3.70 (m, 7H), 3.63–3.59 (m, 1H), 2.23 (t,  $J$  = 7.55 Hz, 2H), 1.63–1.48 (m, 5H), 1.43–1.27 (m, 44H), 1.18–1.14 (m, 2H), 0.90–0.86 (m, 9H);  $^{13}\text{C}$  NMR (150 MHz,  $\text{CD}_3\text{OD}/\text{CDCl}_3$  (1:1,

v/v), reference peak  $\text{CD}_3\text{OD}$  at 49.00 ppm);  $\delta$  175.43, 100.52, 71.49, 71.36, 70.82, 70.34, 69.66, 68.20, 62.26, 54.48, 39.63, 36.96, 34.51, 32.47, 30.49, 30.27, 30.26, 30.23, 30.20, 30.19, 30.14, 29.99, 29.89, 28.51, 27.97, 26.54, 26.29, 23.18, 22.90, 14.31; LRMS(ESI)  $m/z$  for  $\text{C}_{40}\text{H}_{79}\text{NaNO}_8$   $[\text{M} + \text{Na}]^+$  calcd: 724.57, found: 724.45.

**Synthesis of SB2223**, (3R)-3-hydroxy-N-((2S,3R)-3-hydroxy-1-(((2S,3R,4S,5R,6R)-3,4,5-trihydroxy-6-(hydroxymethyl)tetrahydro-2H-pyran-2-yl)oxy)heptadecan-2-yl)-14-methylhexadecanamide

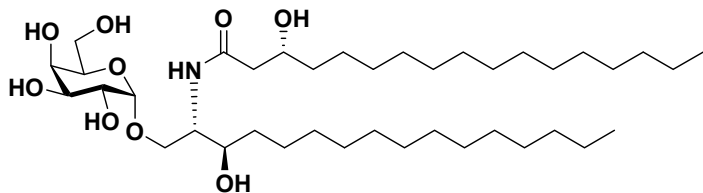

Yield: 83%;  $^1\text{H}$  NMR (500 MHz,  $\text{CD}_3\text{OD}/\text{CDCl}_3$  (1:1, v/v), reference peak TMS at 0.00 ppm):  $\delta$  4.85 (d,  $J$  = 3.5 Hz, 1H), 3.99–3.95 (m, 2H), 3.92 (m, 1H), 3.87–3.67 (m, 7H), 3.64–3.61 (m, 1H), 2.40–2.36 (m, 1H), 2.32–2.27 (m, 1H), 1.55–1.41 (m, 6H), 1.32–1.27 (m, 44H), 0.89 (t,  $J$  = 7.0 Hz, 6H);  $^{13}\text{C}$  NMR (150 MHz,

$\text{CD}_3\text{OD}/\text{CDCl}_3$  (1:1, v/v), reference peak  $\text{CD}_3\text{OD}$  at 49.00 ppm);  $\delta$  173.53, 100.26, 71.54, 71.43, 70.79, 70.26, 69.68, 69.20, 67.91, 62.18, 54.29, 44.26, 37.84, 34.51, 32.47, 30.24, 30.22, 30.19, 29.89, 26.40, 26.13, 23.18, 14.30; LRMS(ESI)  $m/z$  for  $\text{C}_{39}\text{H}_{77}\text{NaNO}_9$   $[\text{M} + \text{Na}]^+$  calcd: 726.55, found: 726.45.

## 2. <sup>1</sup>H and <sup>13</sup>C NMR spectra

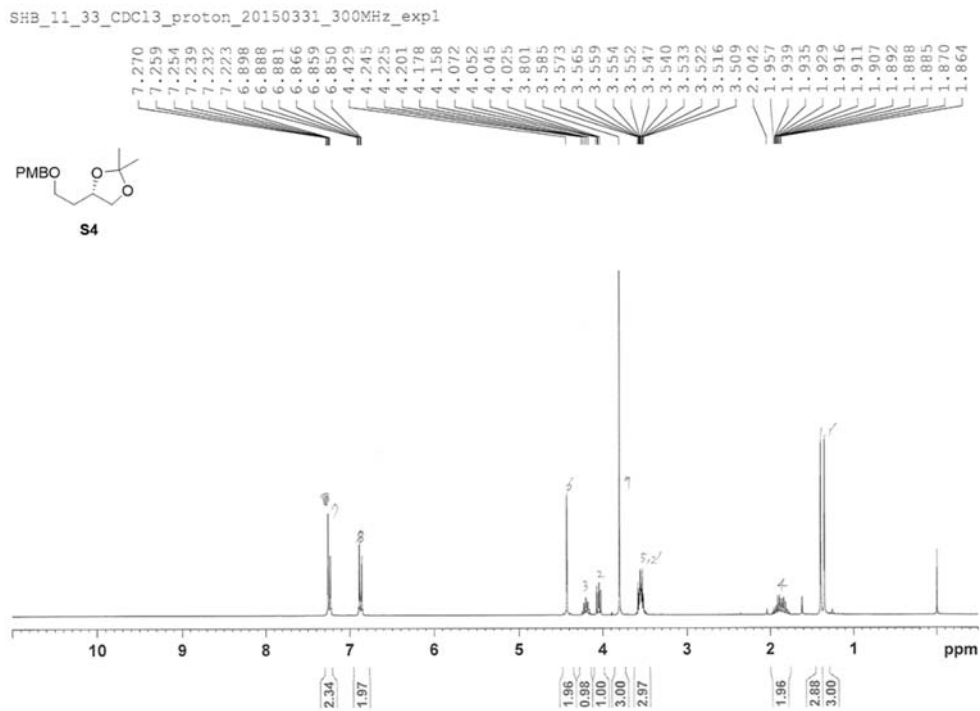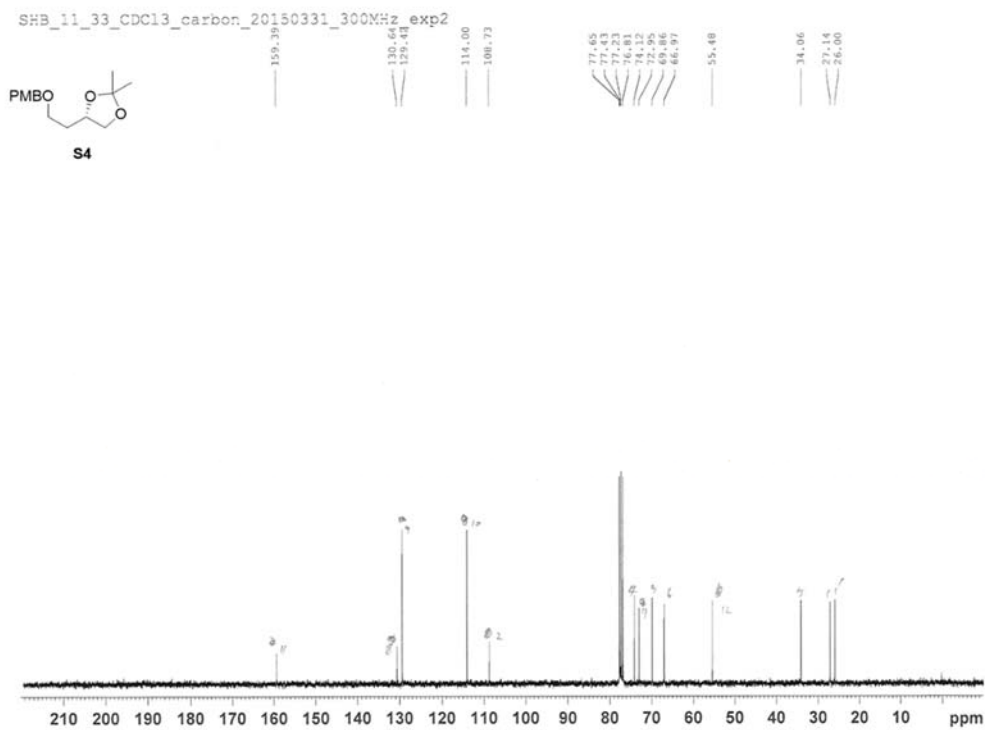

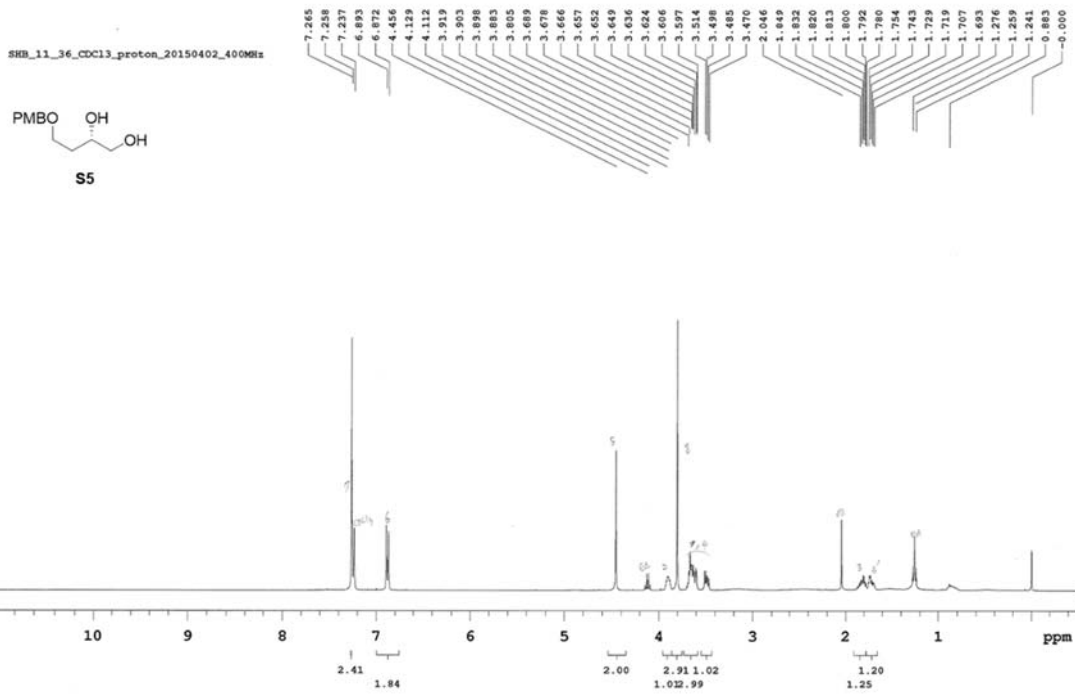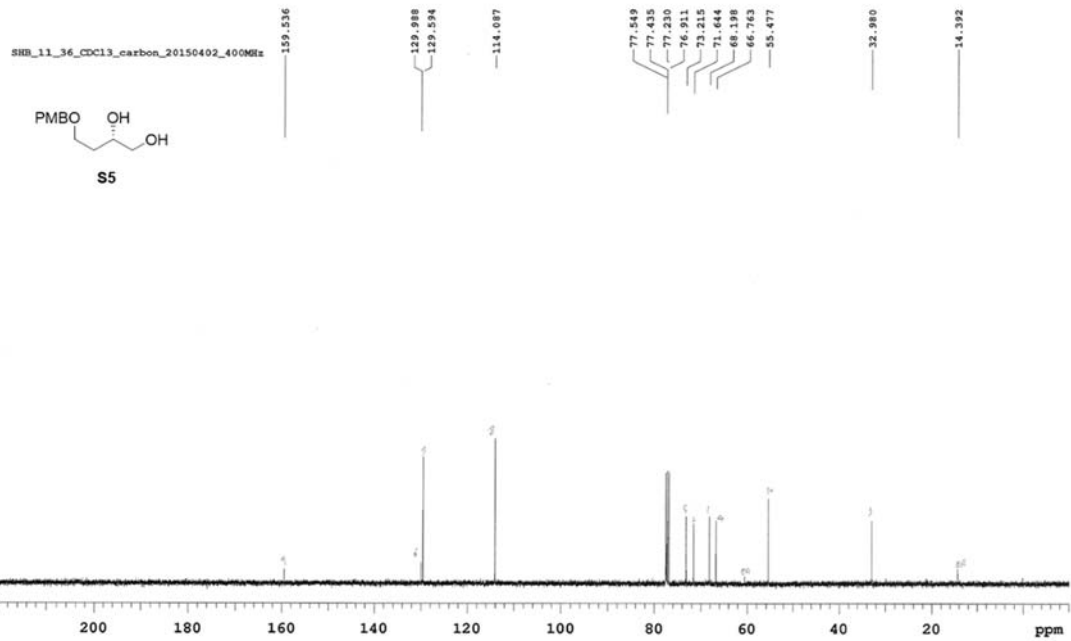

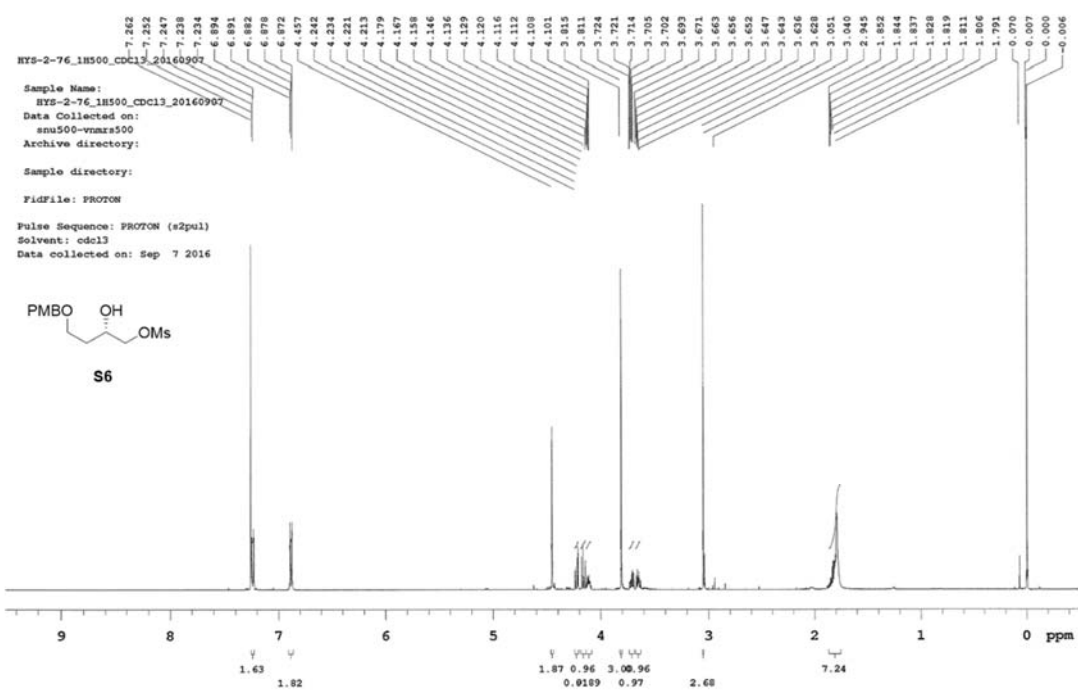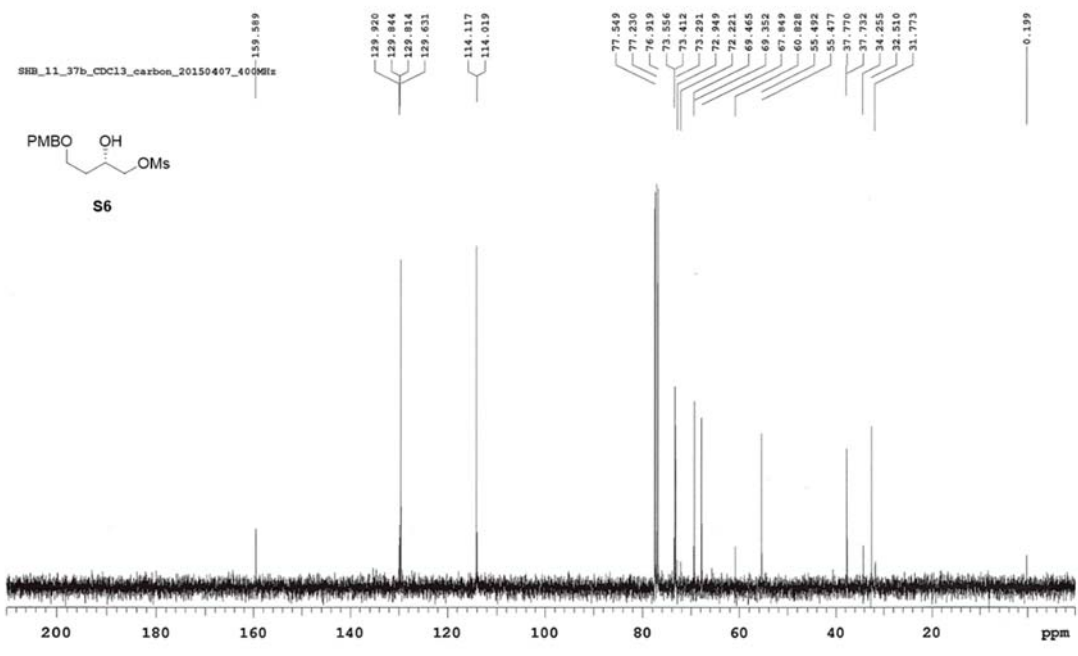

7.271  
7.253  
7.249  
7.127  
7.111  
7.016  
6.895  
6.889  
6.872  
6.836  
6.820  
6.814  
6.797  
6.783  
4.444  
4.434  
4.398  
4.385  
3.897  
3.859  
3.850  
3.837  
3.829  
3.821  
3.808  
3.795  
3.771  
3.760  
3.740  
3.722  
3.610  
3.603  
3.591  
3.584  
3.578  
3.560  
3.555  
3.066  
3.060  
3.052  
3.036  
2.784  
2.775  
2.766  
2.747  
2.738  
2.523  
2.517  
2.508  
1.917  
1.902  
1.888  
1.879  
1.865  
1.797  
1.786  
1.773  
1.761  
1.756  
1.745  
1.257  
-0.000

SHM\_11\_40\_41\_CDCl3\_proton\_20150410\_500MHz

Sample Name:  
SHM\_11\_40\_41\_CDCl3\_proton\_20150410\_500MHz  
Data Collected on:  
smu500-wmrs500  
Archive directory:  
Sample directory:  
FidFile: PROTON  
Pulse Sequence: PROTON (s2ps1)  
Solvent: cdcl3  
Data collected on: Apr 10 2015

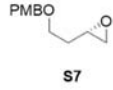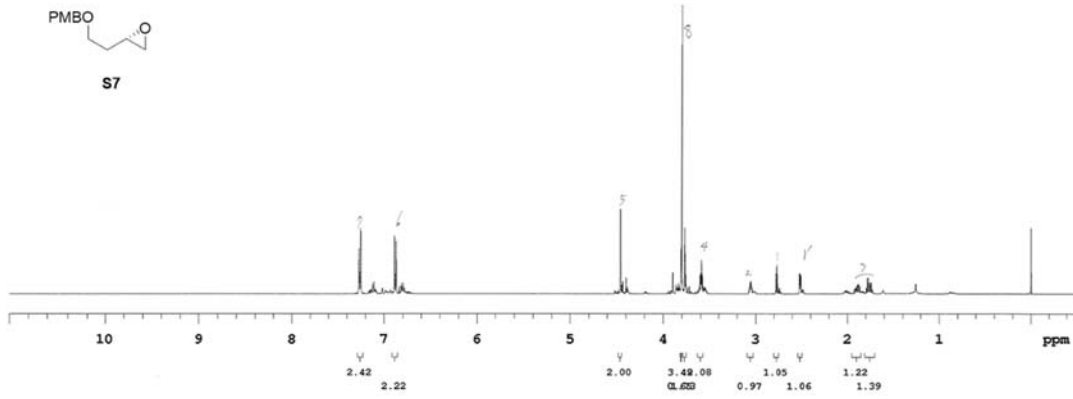

SHM\_11\_40\_41\_CDCl3\_carbon\_20150410\_500MHz 159.415

130.587  
130.306  
130.200  
130.055  
129.485  
127.176  
114.050  
114.019  
113.890  
113.814  
110.487

77.488  
77.230  
76.979  
73.032  
72.968  
71.016  
67.271  
66.937  
66.869  
55.694  
55.482  
55.428  
50.301  
47.300  
35.138  
33.163

Sample Name:  
SHM\_11\_40\_41\_CDCl3\_carbon\_20150410\_500MHz  
Data Collected on:  
smu500-wmrs500  
Archive directory:  
Sample directory:  
FidFile: CARBON  
Pulse Sequence: CARBON (s2ps1)  
Solvent: cdcl3  
Data collected on: Apr 10 2015

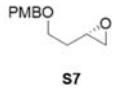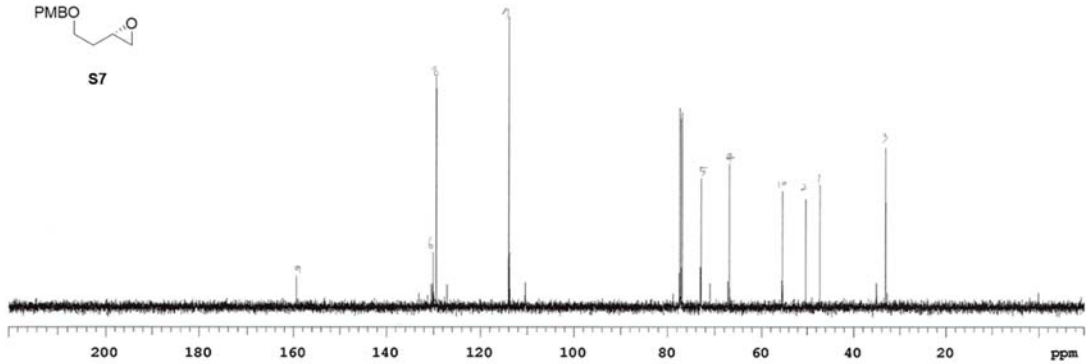

SHB\_11\_42\_CDCl3\_proton\_20150413\_300MHz\_exp1

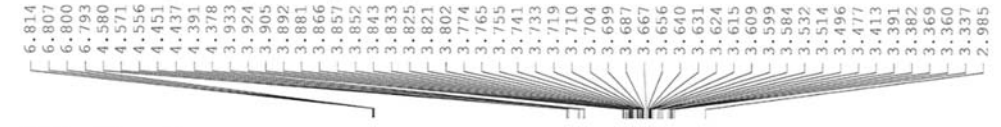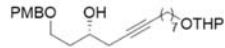

S9

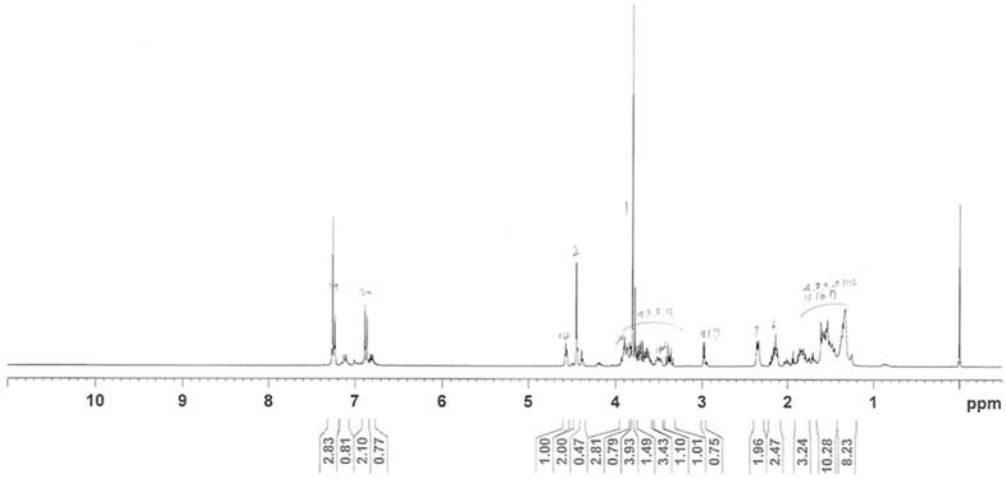

SHB\_11\_42\_CDCl3\_carbon\_20150413\_300MHz\_exp5

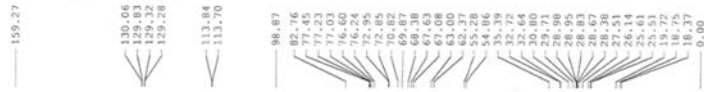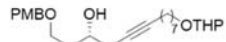

S9

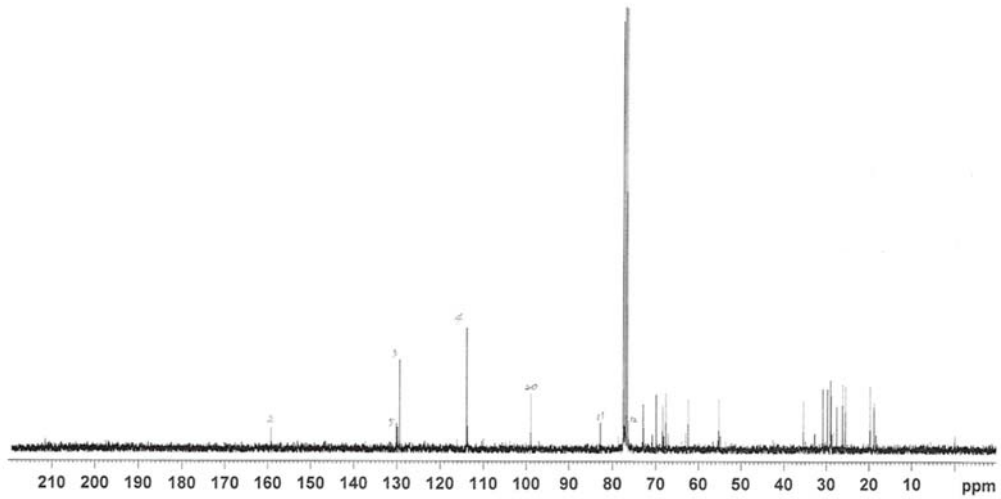

7.258  
7.237  
6.882  
6.861  
SHB\_11\_100\_CDCl3\_proton\_21050615\_400MHz

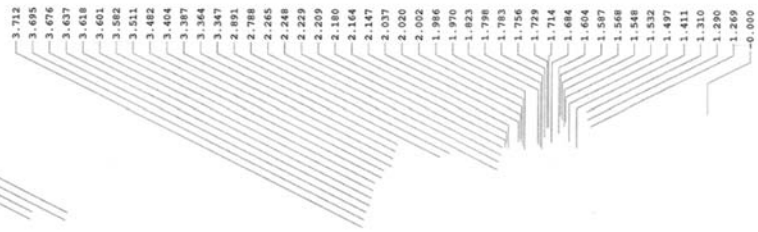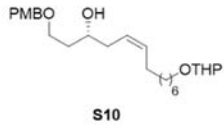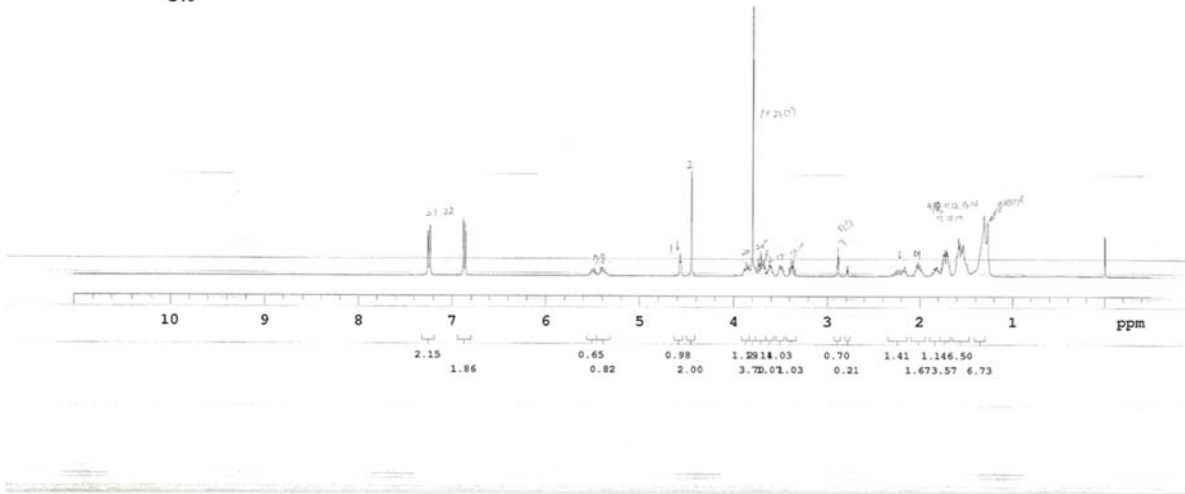

159.453  
134.239  
132.979  
130.269  
129.510  
129.495  
126.041  
125.351  
114.026  
99.044  
77.250  
76.911  
73.162  
73.124  
71.758  
71.333  
70.839  
69.220  
68.987  
68.835  
67.894  
67.864  
62.551  
55.462  
40.935  
37.663  
36.548  
36.016  
35.462  
32.836  
30.984  
29.952  
29.929  
29.883  
29.785  
29.739  
29.679  
29.603  
29.565  
29.512  
29.443  
29.314  
27.599  
26.430  
26.392  
25.800  
25.701  
19.903  
SHB\_11\_100\_CDCl3\_carbon\_21050615\_400MHz

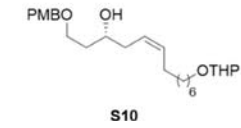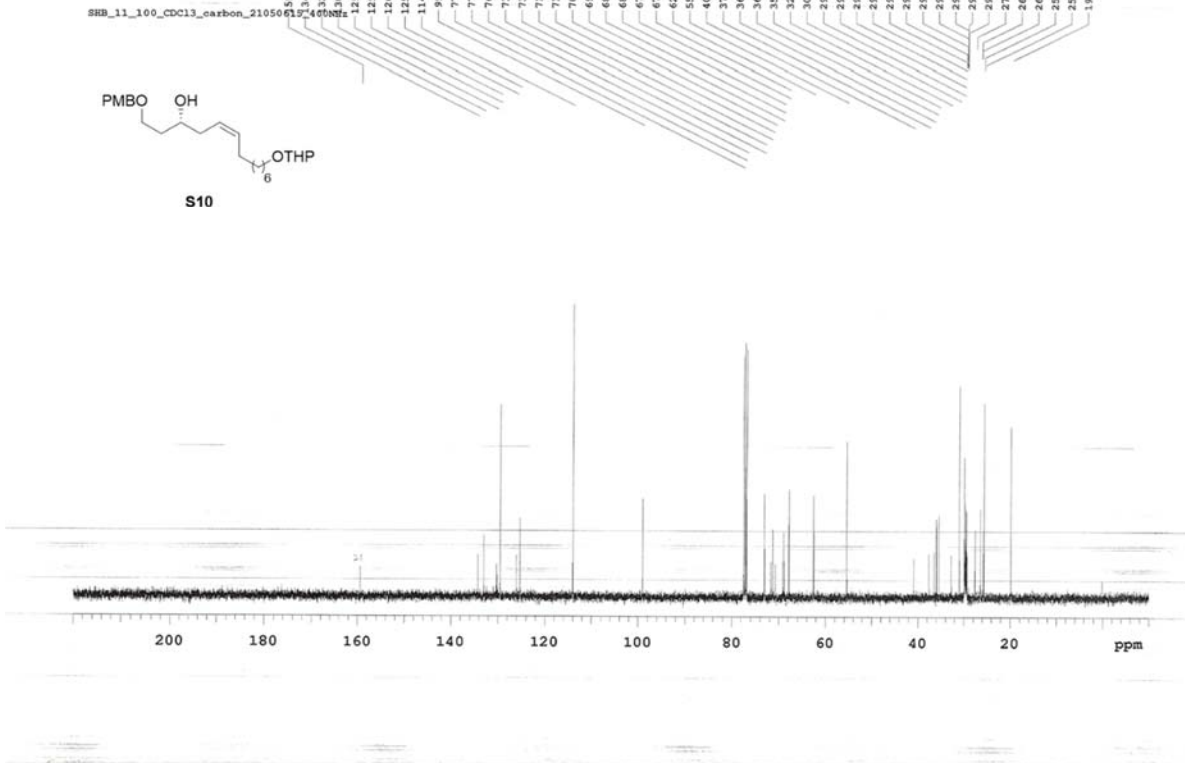



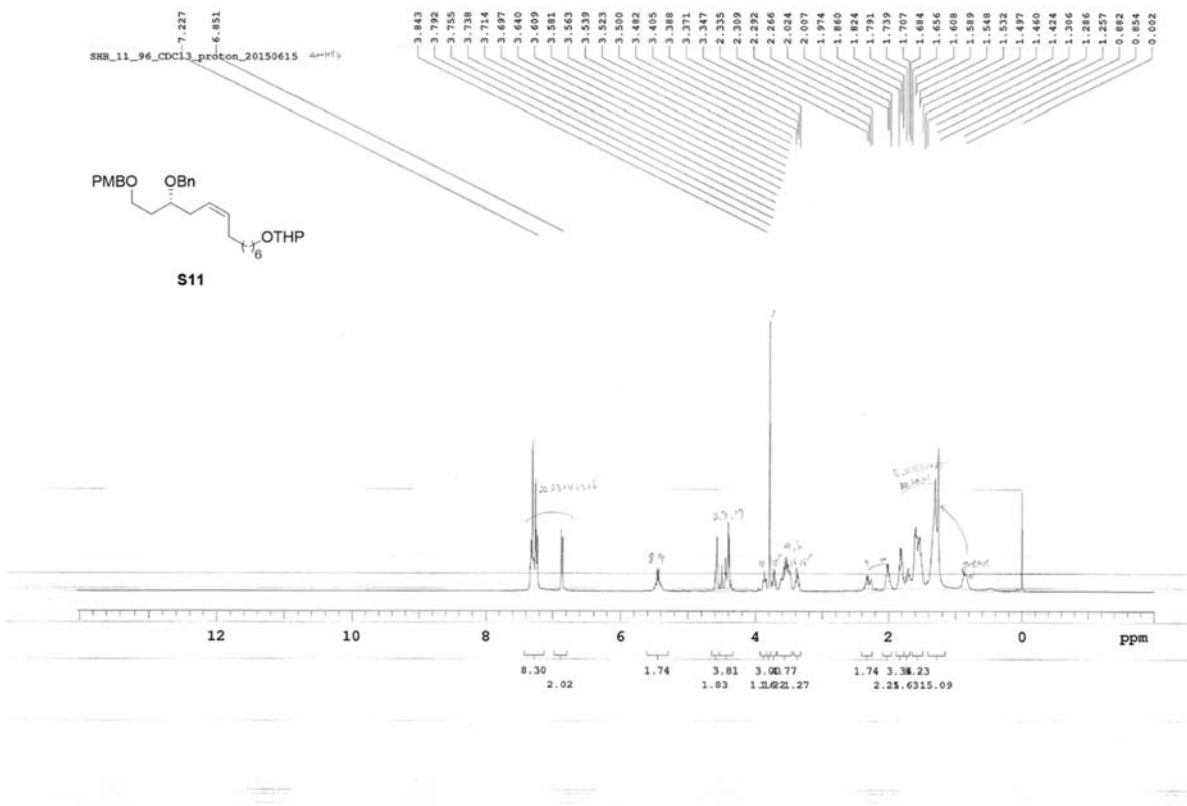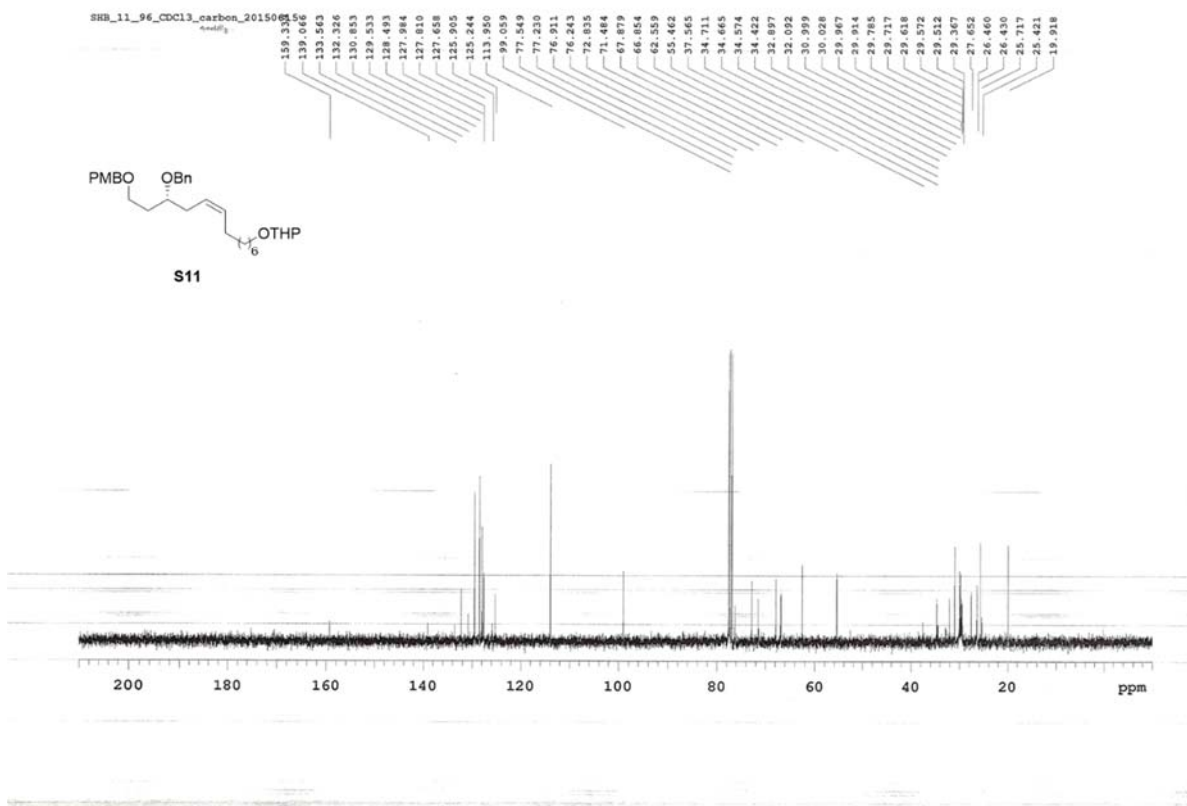



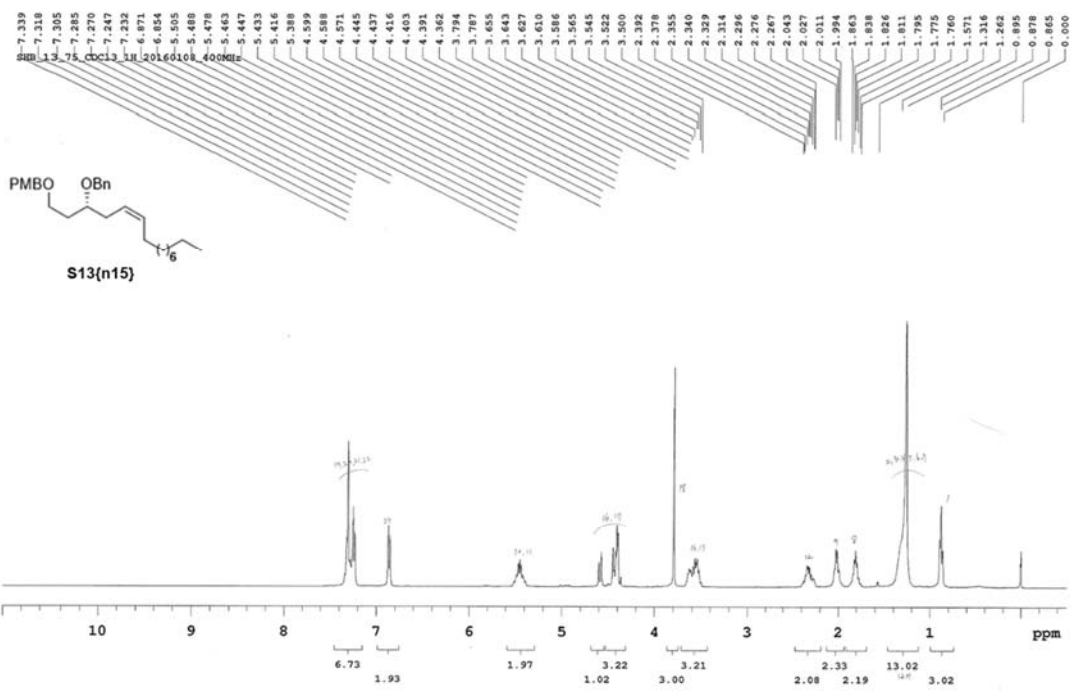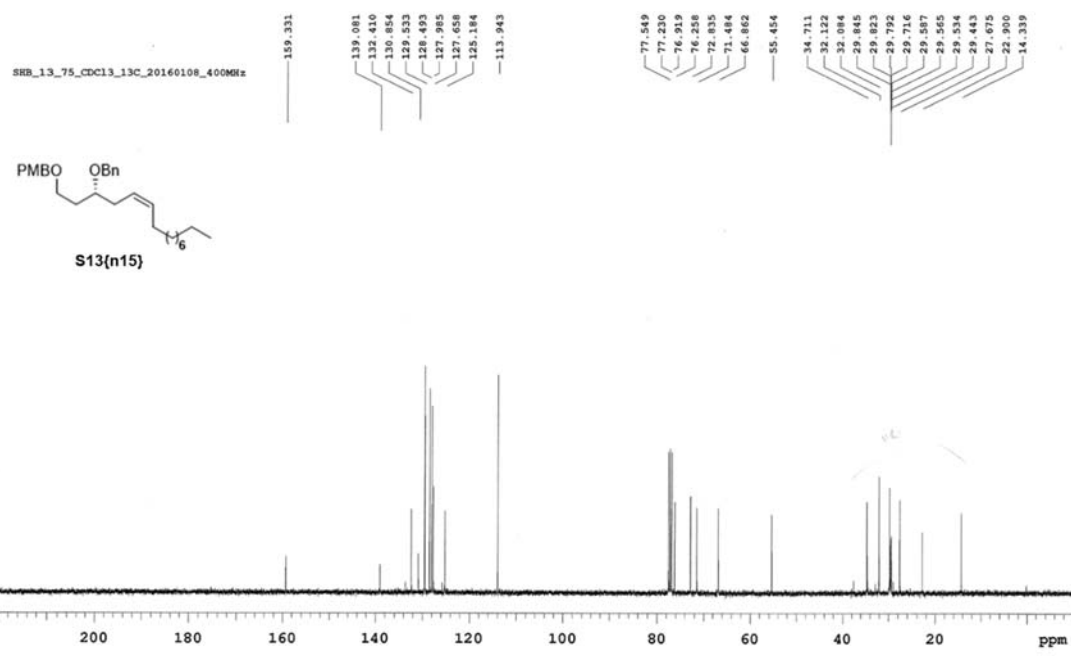

SHB\_13\_72\_CDC13\_1H\_20160108\_300MHz\_exp2

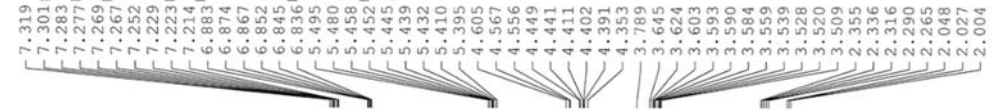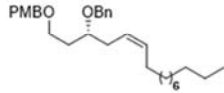

S13(n16)

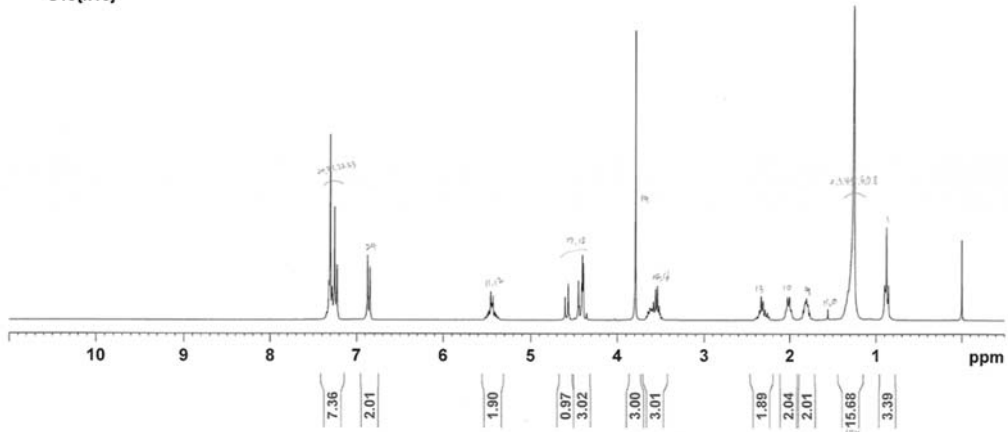

SHB\_13\_72\_CDC13\_13C\_20160108\_300MHz\_exp3

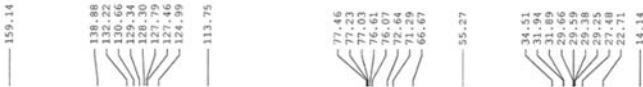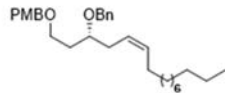

S13(n16)

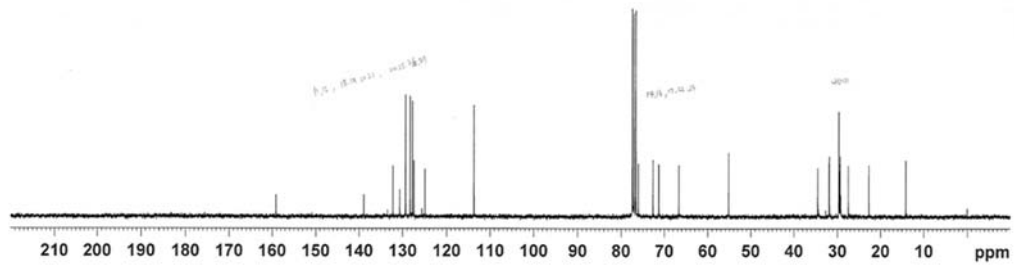

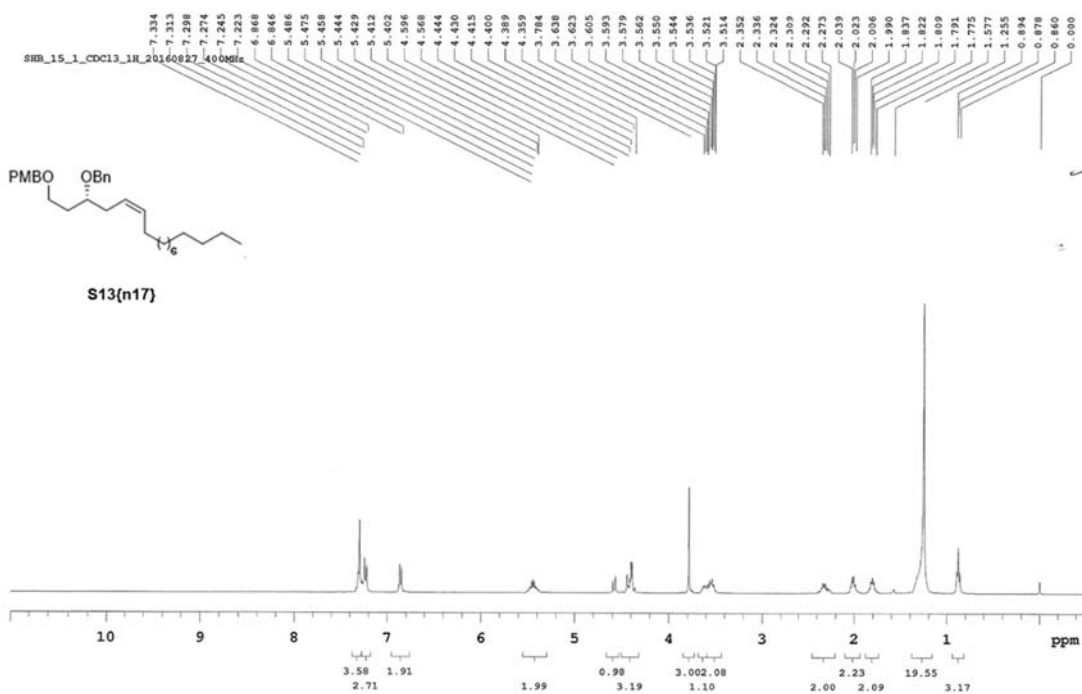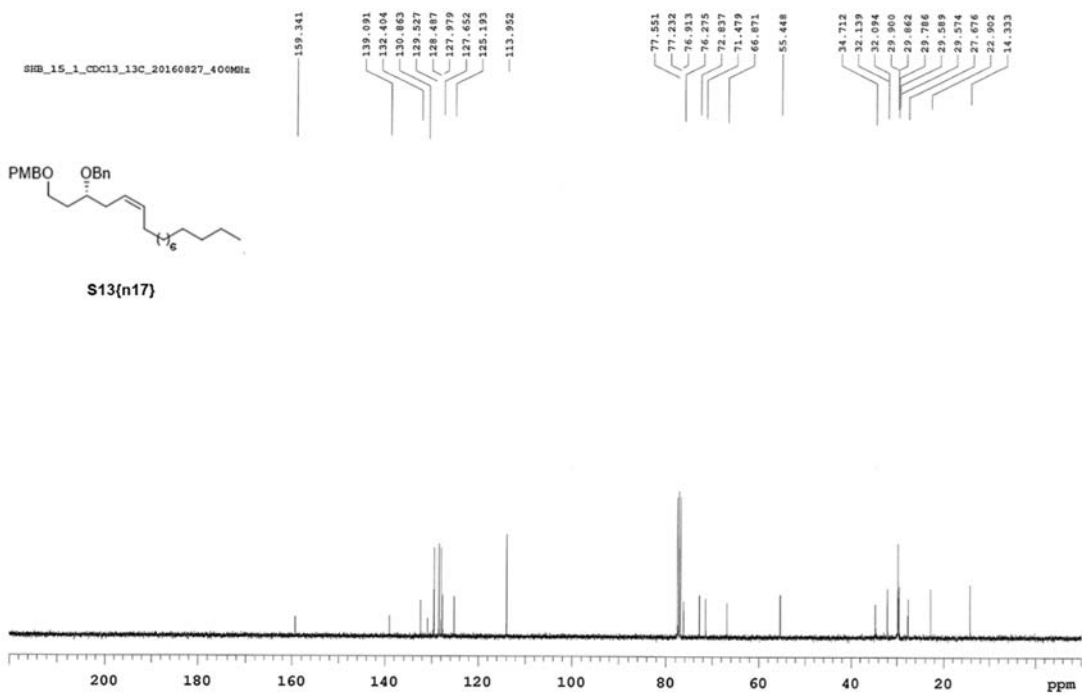

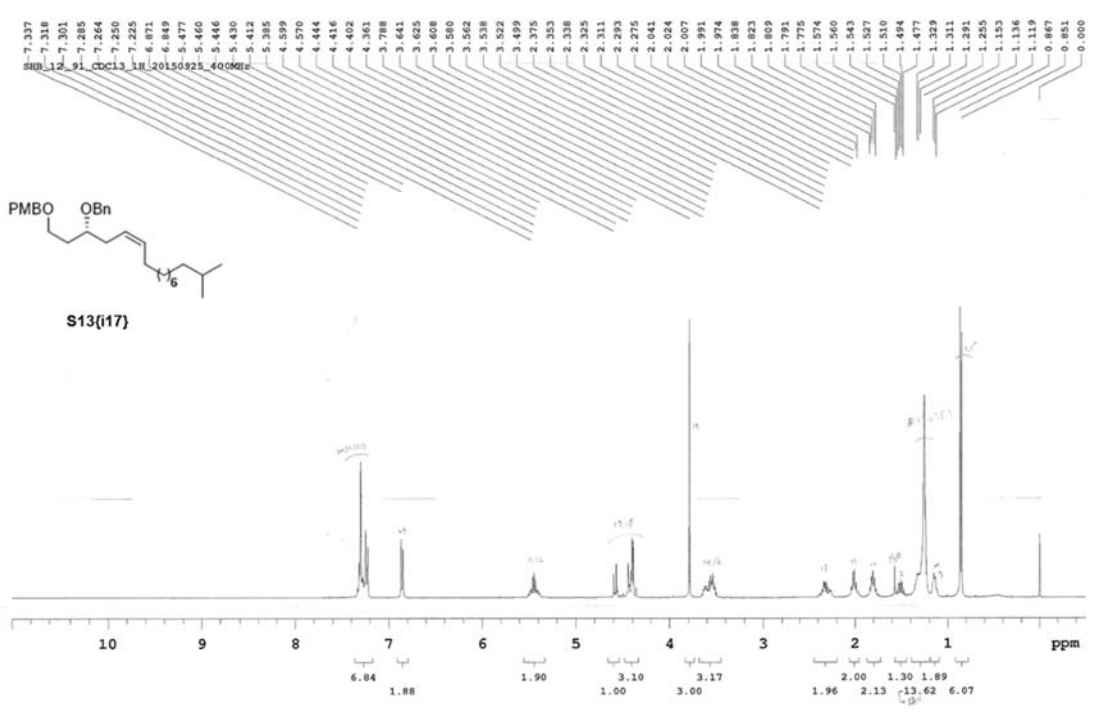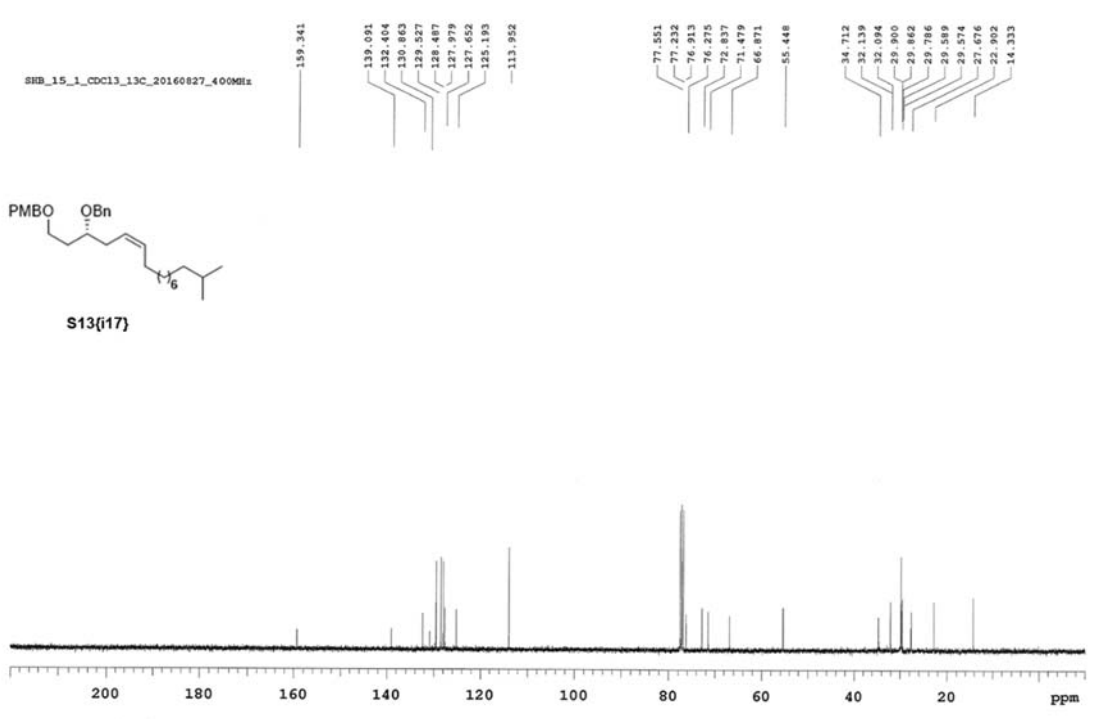

HYS-1-46-HN300-CDC13-20160107\_exp1

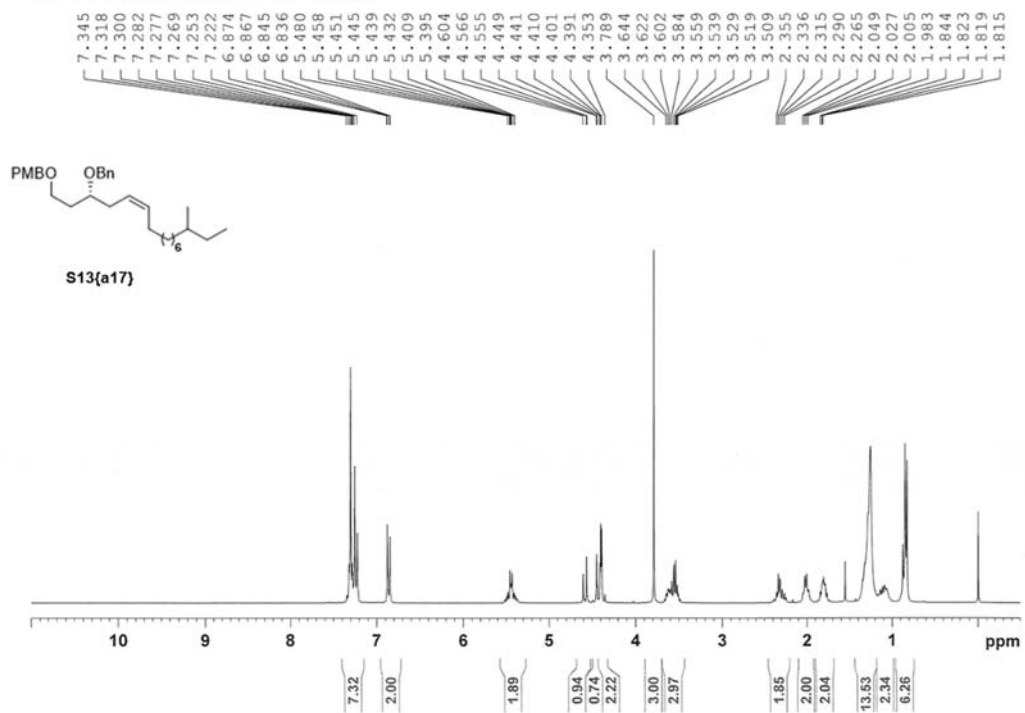

HYS-1-46-CN300-CDC13-20160107\_exp2

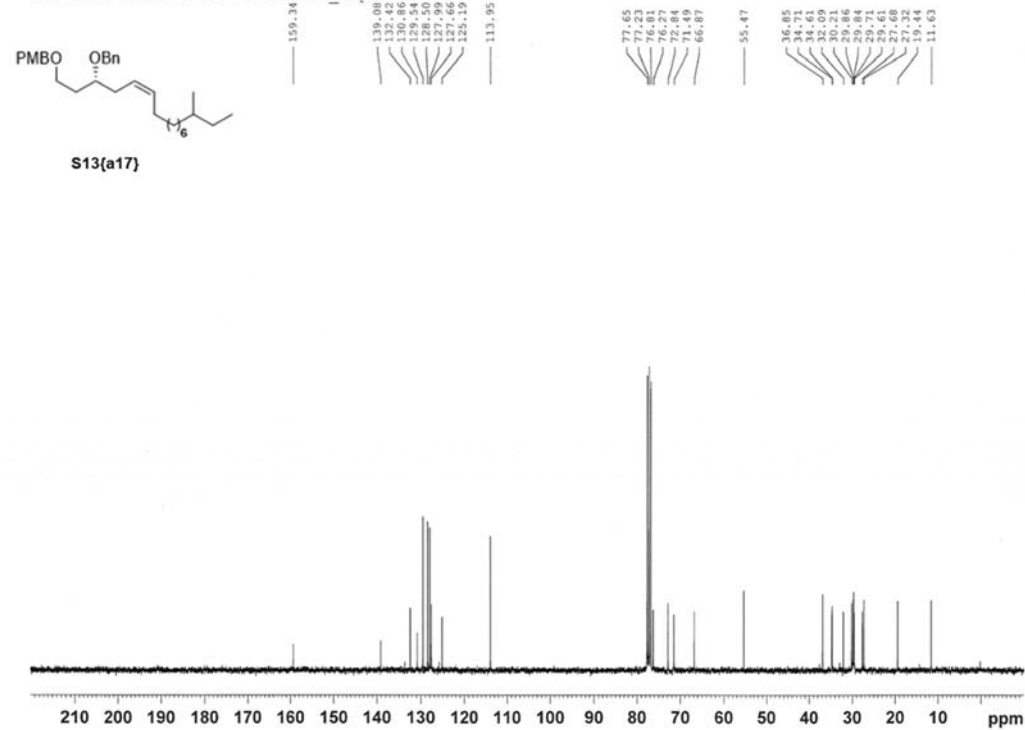





SHB\_14\_74\_CDC13\_1H\_20160415\_300MHz\_exp1

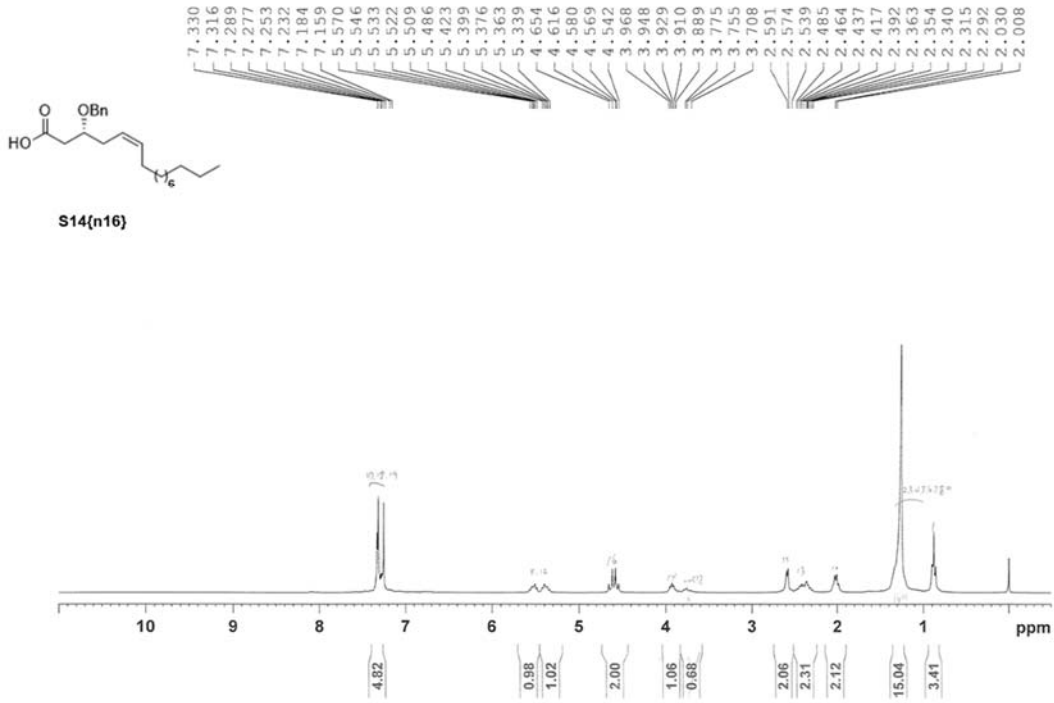

SHB\_14\_74\_CDC13\_13C\_20160415\_300MHz\_exp2

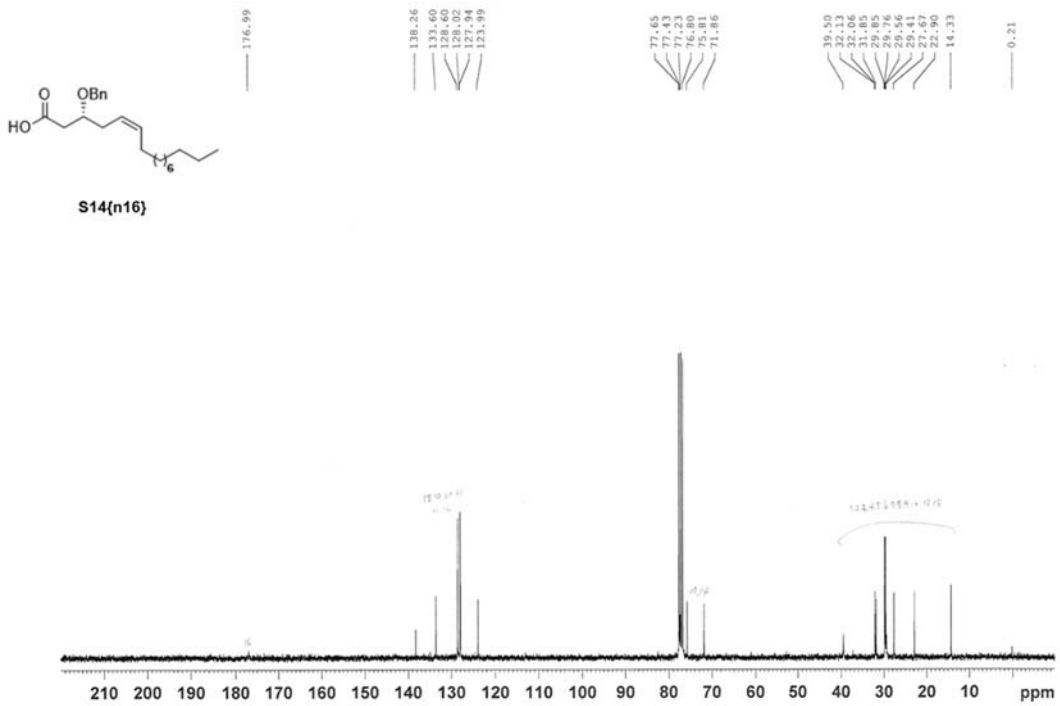

SHB\_15\_9C\_CDCl3\_1H\_20160905\_300MHz\_exp1

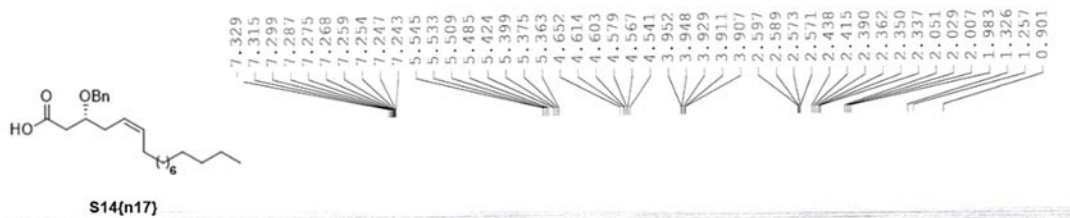

SHB\_15\_9C\_CDCl3\_13C\_20160905\_300MHz\_exp2

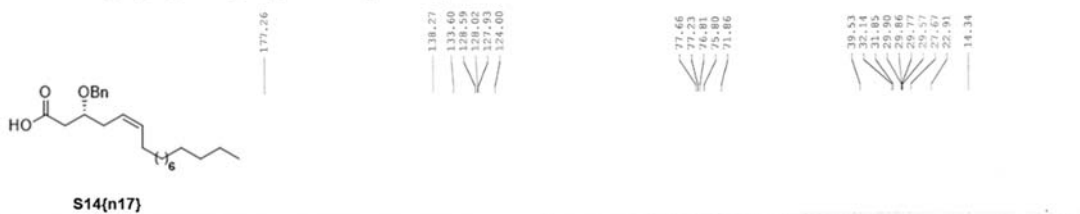

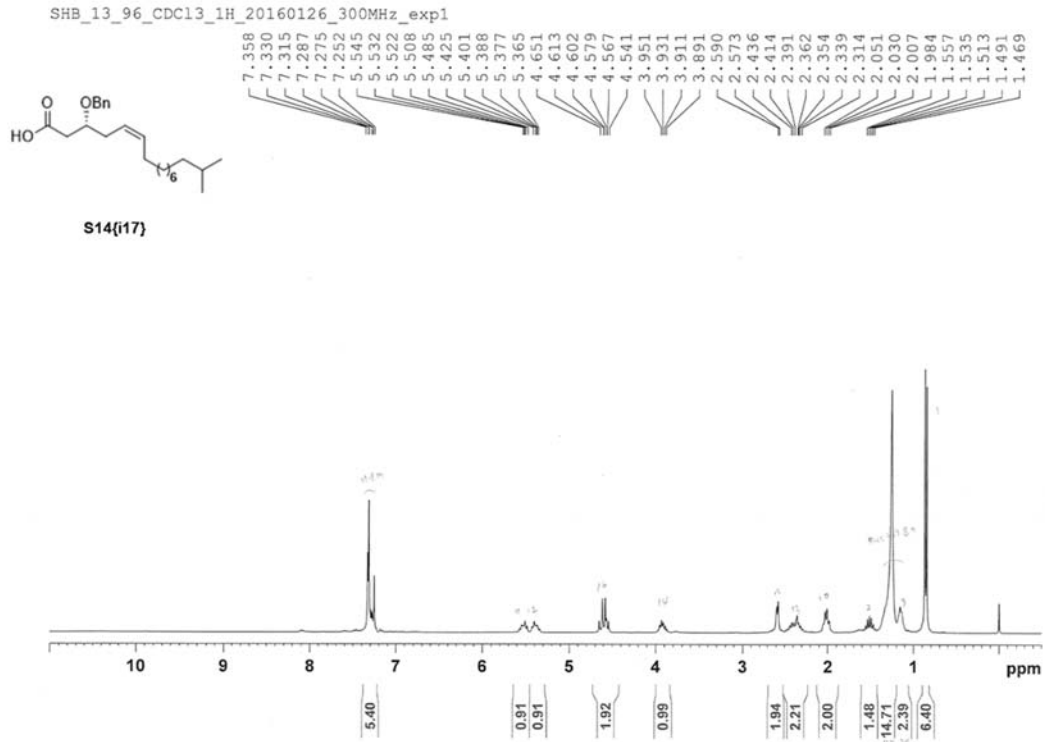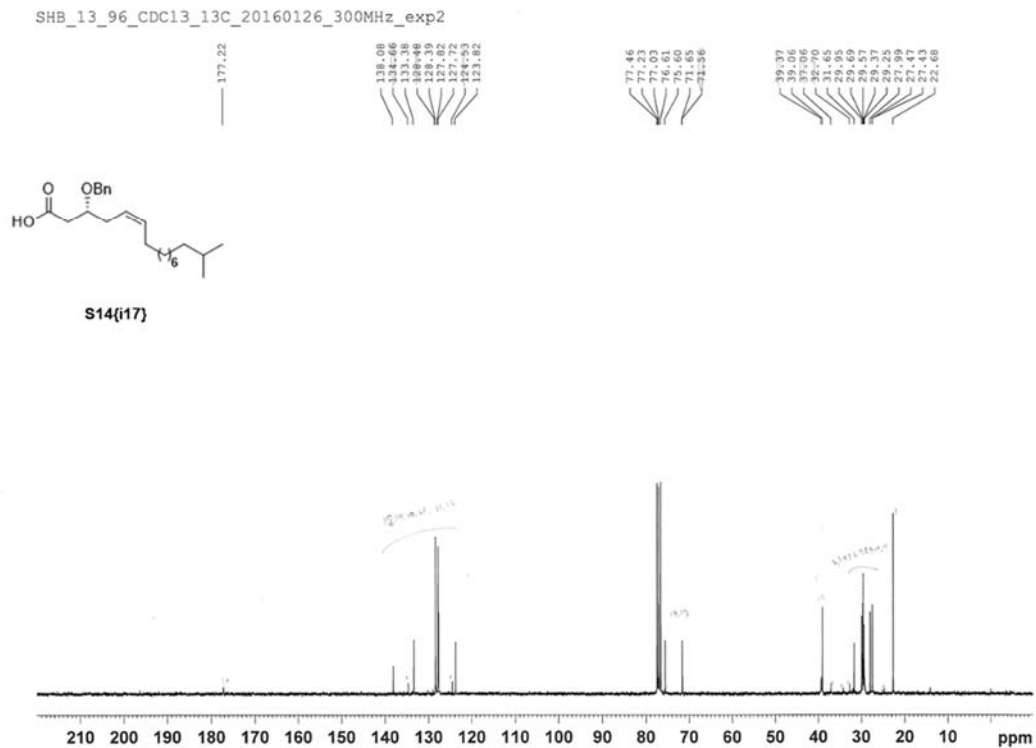

SHB\_14\_64\_CDCl3\_1H\_20160404\_300MHz\_exp3

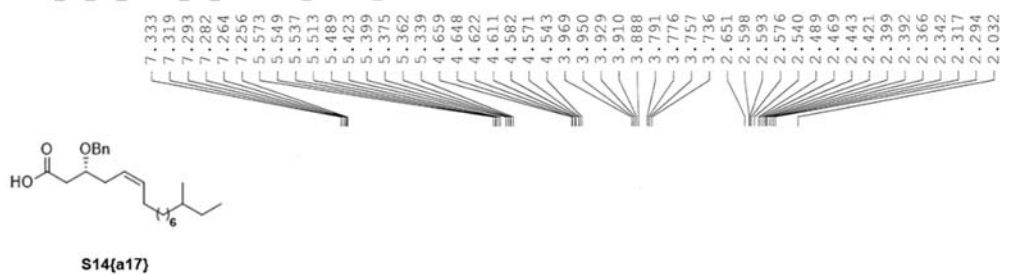

SHB\_14\_64\_CDCl3\_13C\_20160404\_300MHz\_exp4

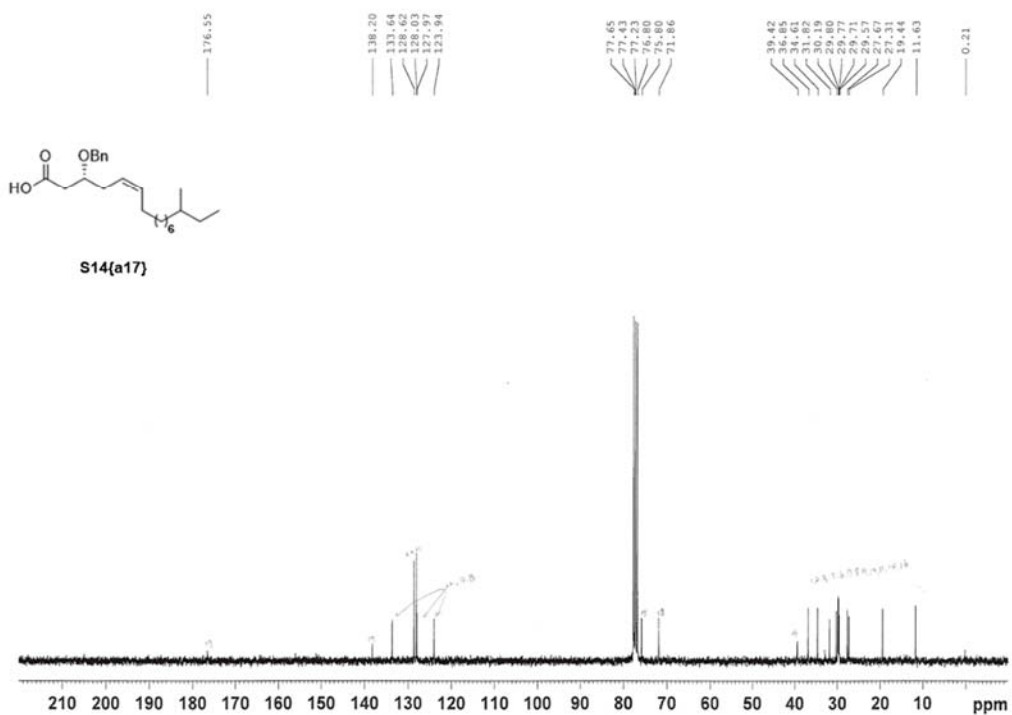

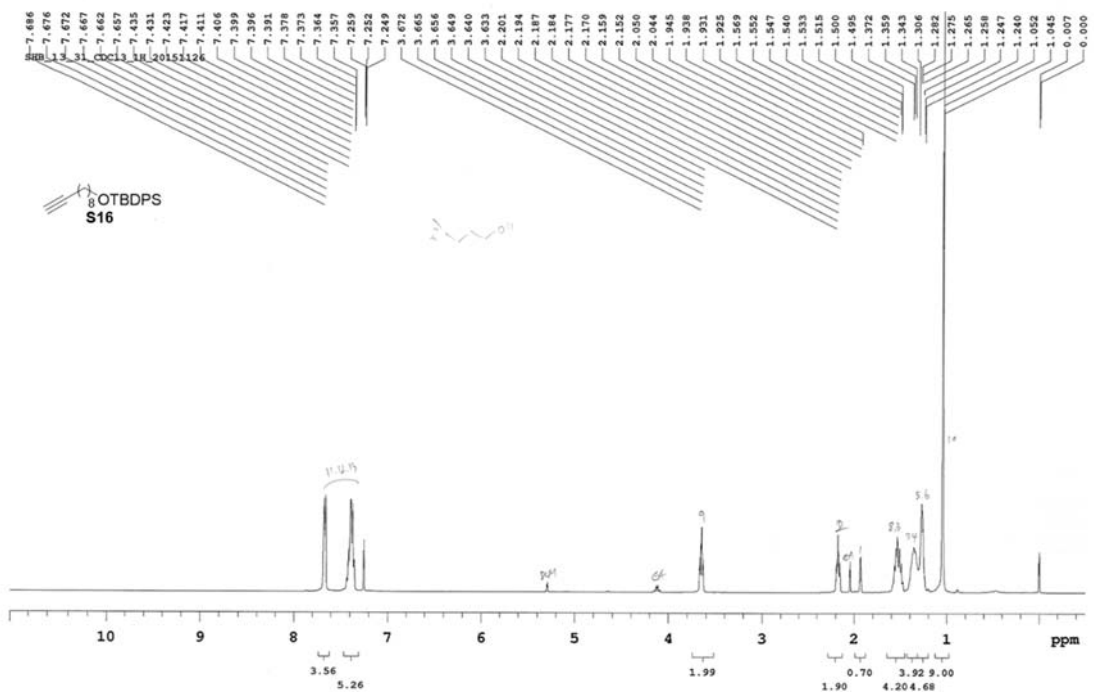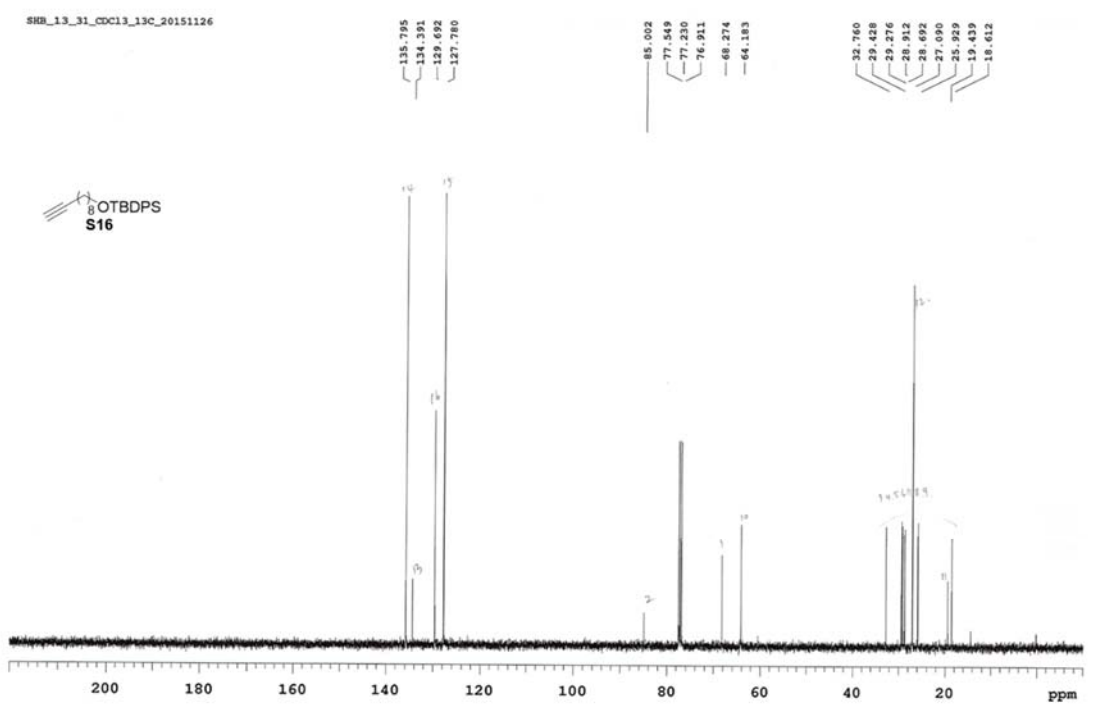









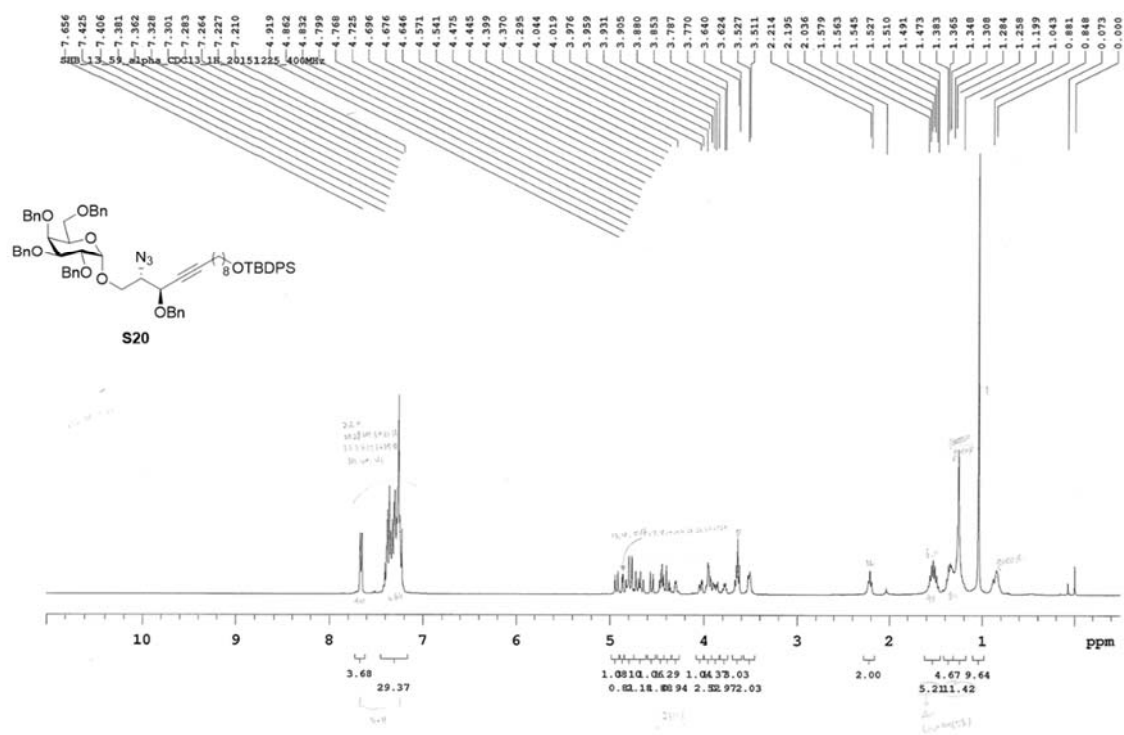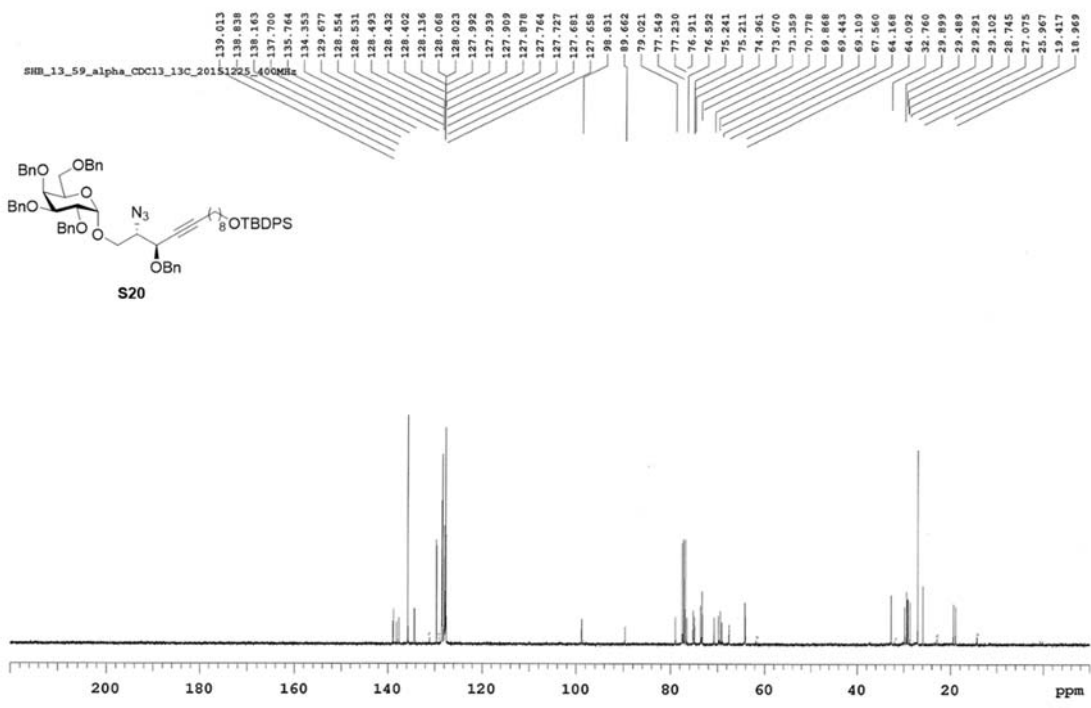

SHB\_13\_100\_CDC13\_1H\_20160129\_300MHz\_exp4

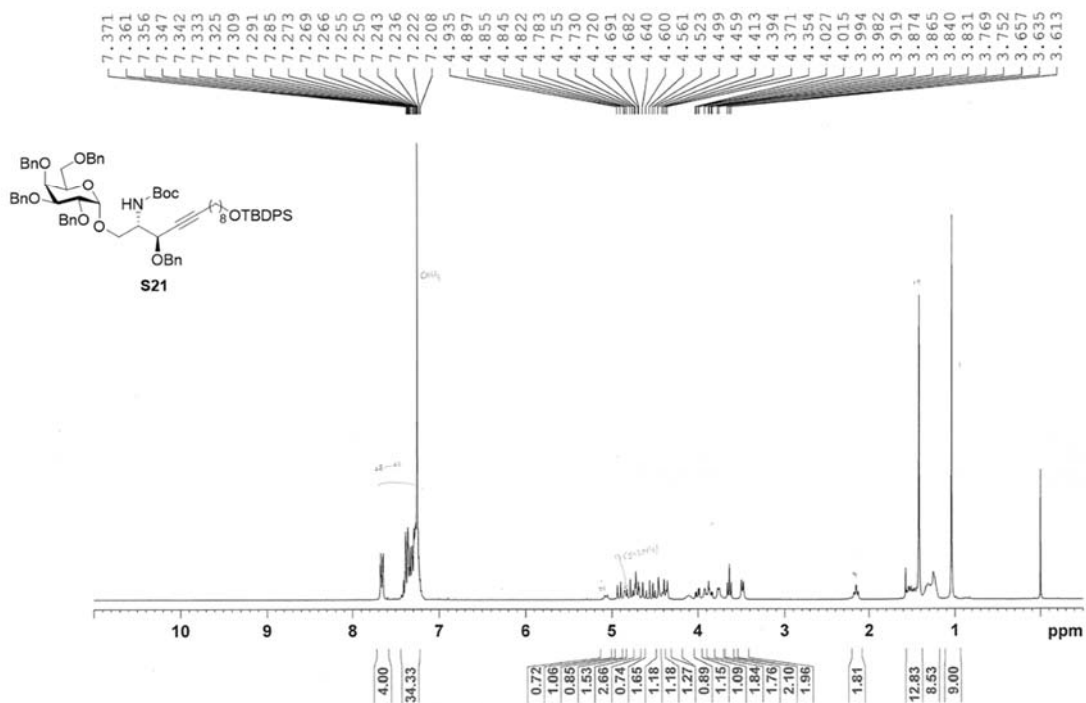

SHB\_14\_5\_CDC13\_1H\_20160205\_300MHz\_exp2

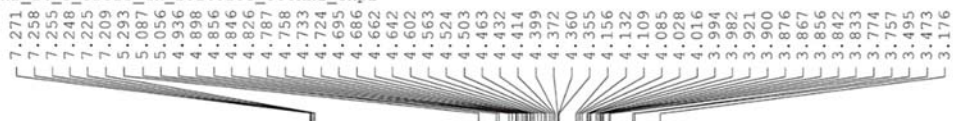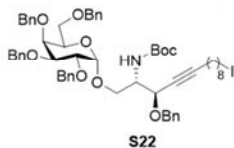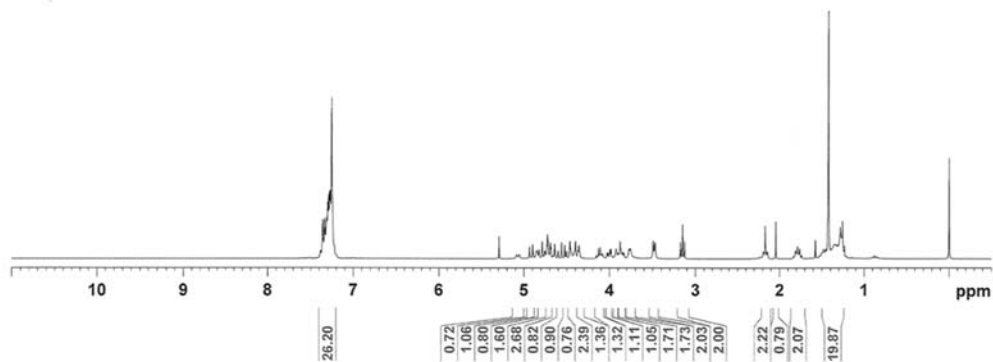

SHB\_14\_5\_CDC13\_13C\_20160205\_300MHz\_exp3

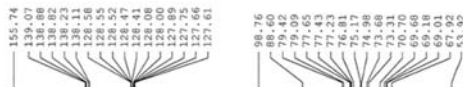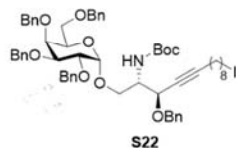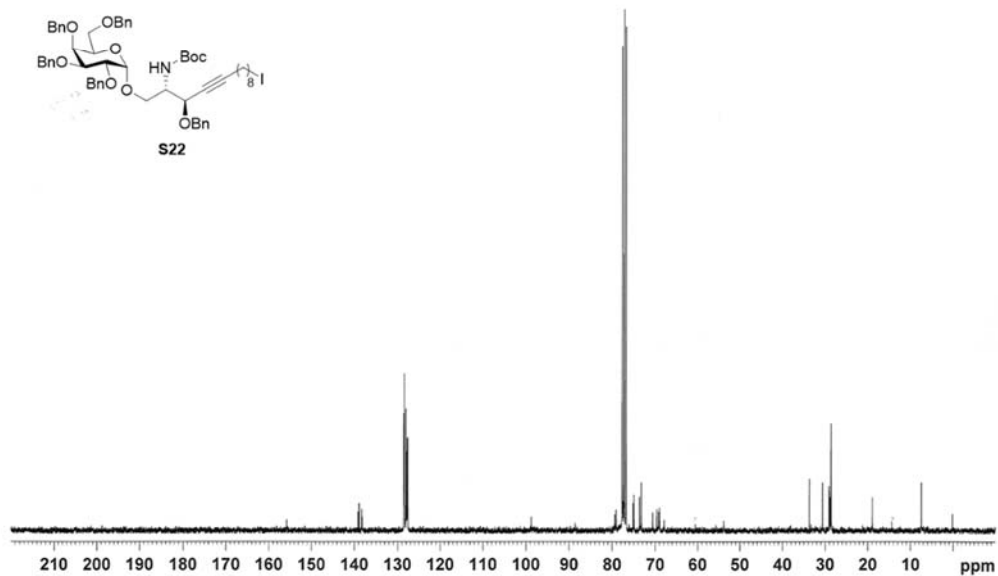

SHB\_14\_6\_CDC13\_1H\_20160210\_300MHz\_exp1

7.357  
7.335  
7.315  
7.309  
7.300  
7.289  
7.278  
7.268  
7.257  
7.248  
5.081  
5.051  
4.936  
4.898  
4.856  
4.847  
4.824  
4.785  
4.756  
4.735  
4.722  
4.696  
4.684  
4.662  
4.641  
4.601  
4.562  
4.524  
4.503  
4.464  
4.418  
4.399  
4.375  
4.358  
4.117  
4.106  
4.028  
4.016  
3.995  
3.983  
3.971  
3.922  
3.902  
3.876  
3.866  
3.841  
3.832  
3.768  
3.752  
3.498  
3.476  
2.190  
2.186  
2.167

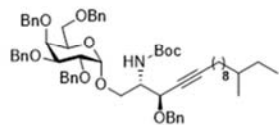

S23(a17)

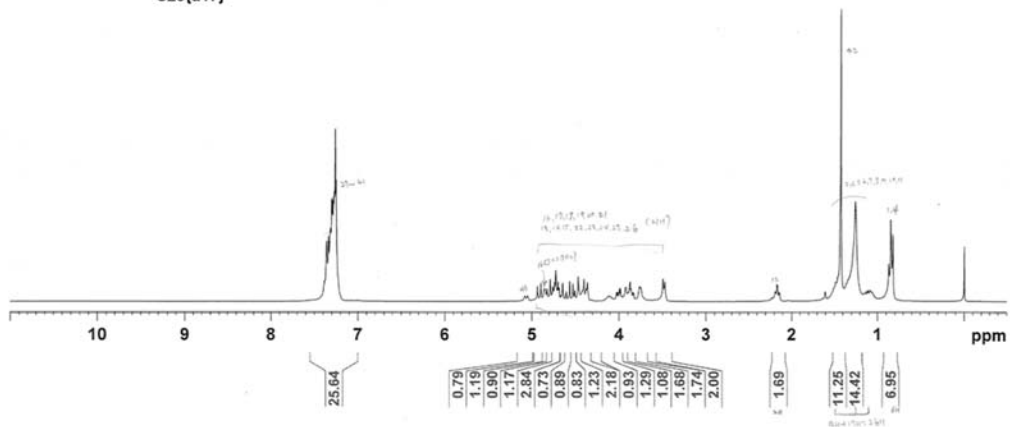

SHB\_14\_6\_CDC13\_13C\_20160210\_300MHz\_exp2

135.74  
135.06  
134.89  
134.82  
134.73  
134.57  
128.54  
128.51  
128.51  
128.40  
128.28  
128.00  
128.00  
127.96  
127.96  
127.96  
127.62  
98.72  
88.77  
79.65  
79.65  
77.56  
77.43  
77.23  
77.23  
75.94  
75.18  
74.98  
74.98  
73.30  
73.30  
70.68  
69.66  
69.00  
69.00  
67.89  
53.88  
36.85  
36.51  
36.51  
29.92  
29.83  
29.19  
29.19  
29.21  
28.90  
28.90  
29.31  
19.44  
18.97  
11.63  
0.21

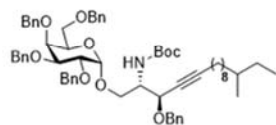

S23(a17)

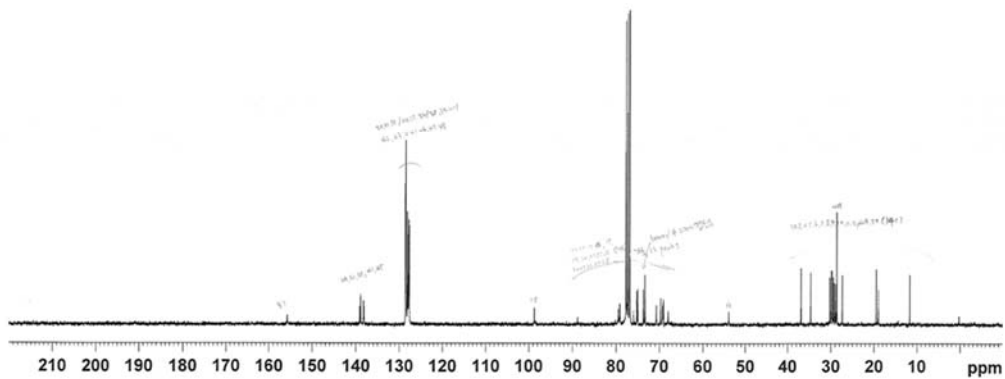

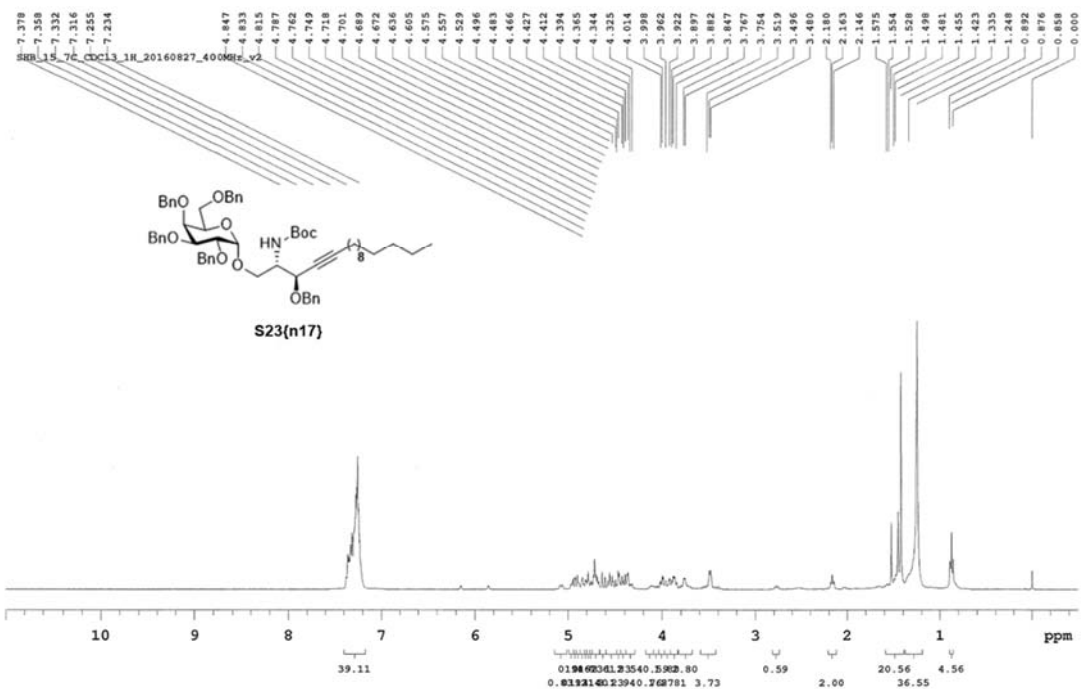

SHB\_15\_7C\_CDC13\_13C\_20160830\_300MHz\_exp2

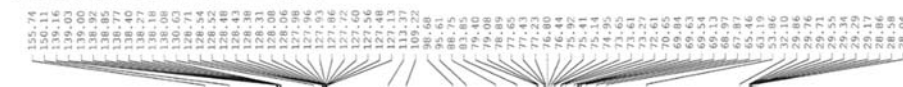

SHB\_14\_35Ab\_HPLC\_CDC13\_1H\_20160315\_300MHz\_exp1

7.270  
7.267  
7.258  
7.253  
7.247  
7.241  
7.228  
7.217  
7.202  
5.291  
5.082  
5.053  
4.954  
4.936  
4.916  
4.898  
4.856  
4.846  
4.825  
4.813  
4.786  
4.757  
4.735  
4.723  
4.696  
4.684  
4.662  
4.642  
4.623  
4.602  
4.563  
4.524  
4.503  
4.463  
4.418  
4.397  
4.373  
4.357  
4.156  
4.132  
4.118  
4.109  
4.085  
4.028  
4.016  
3.994  
3.962  
3.969  
3.922  
3.898  
3.874  
3.865  
3.856  
3.840  
3.831

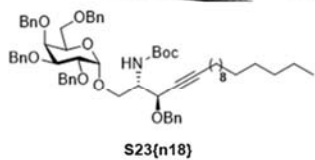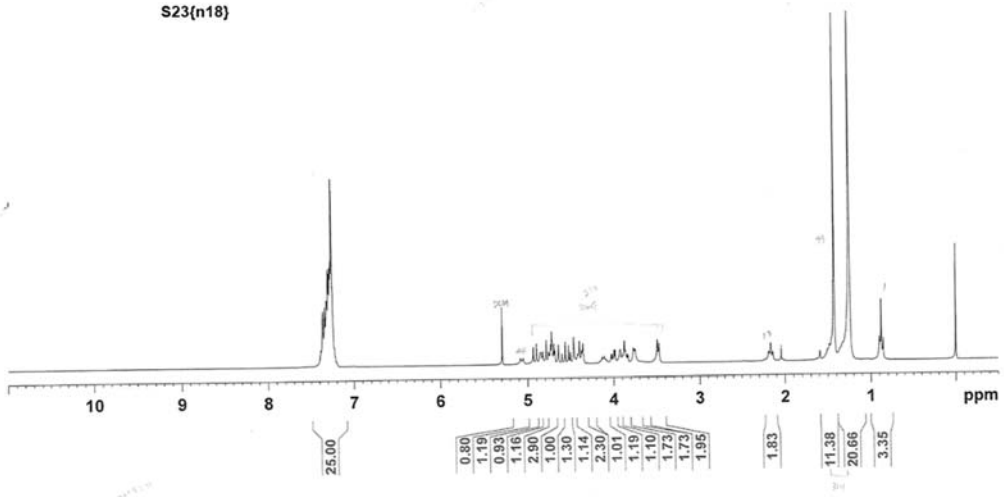

SHB\_14\_35Ab\_HPLC\_CDC13\_13C\_20160315\_300MHz\_exp2

155.74  
139.08  
138.81  
138.21  
138.13  
138.13  
128.55  
128.51  
128.46  
128.10  
128.07  
128.01  
127.74  
127.61  
98.71  
88.78  
79.42  
77.65  
77.44  
77.23  
75.15  
74.98  
73.68  
70.27  
69.64  
69.13  
67.90  
53.87  
32.14  
29.99  
29.57  
29.37  
28.61  
28.61  
22.91  
18.56  
18.35  
0.21

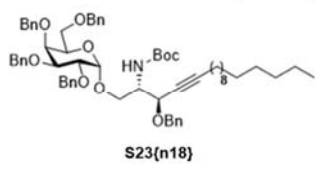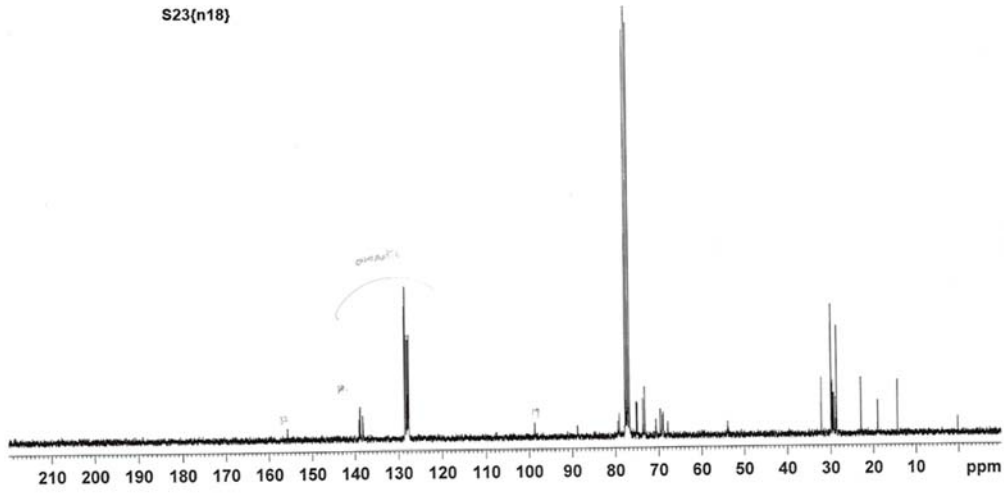

SHB\_14\_35Bb\_pro\_HPLC\_CDCl3\_1H\_20160316\_300MHz\_expl

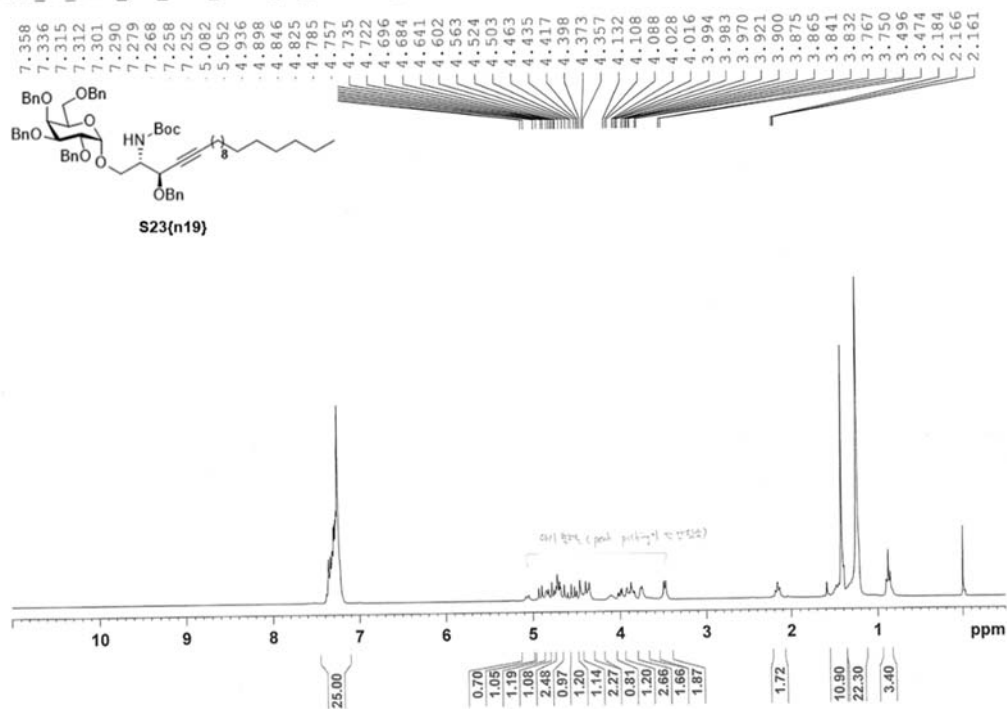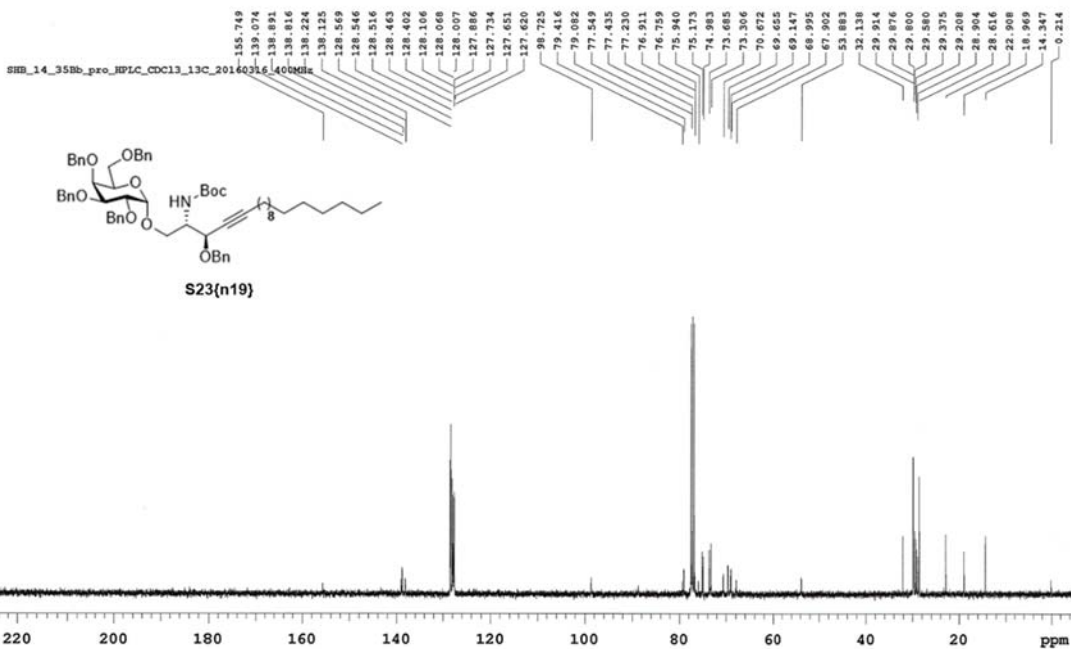

7.349  
7.333  
7.304  
7.283  
7.256  
7.231  
7.205  
7.180  
7.167  
6.619  
6.602  
5.466  
5.445  
5.430  
5.359  
5.337  
4.903  
4.879  
4.821  
4.795  
4.713  
4.696  
4.626  
4.598  
4.575  
4.531  
4.507  
4.485  
4.456  
4.433  
4.409  
4.381  
4.357  
3.994  
3.974  
3.864  
3.840  
3.798  
3.759  
3.469  
2.344  
2.315  
2.300  
2.275  
2.261  
2.110  
2.096  
2.082  
1.977  
1.963  
1.949  
1.466  
1.453  
1.438  
1.422  
1.408  
1.334  
1.294  
1.280  
1.246  
0.978  
0.863  
0.845  
0.000

KSH-2-58A\_spot1\_2  
H\_CDC13\_2016-04-14

Sample Name:  
SHB\_14\_75C\_CDC13\_1H\_20150420\_500MHz  
Data Collected on:  
snu500-vnars500  
Archive directory:

Sample directory:

FidFile: PROTON  
Pulse Sequence: PROTON (s2pu1)  
Solvent: cdcl3  
Data collected on: Apr 20 2016

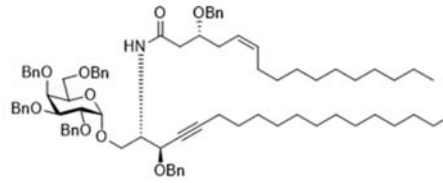

S24(n18/n16)

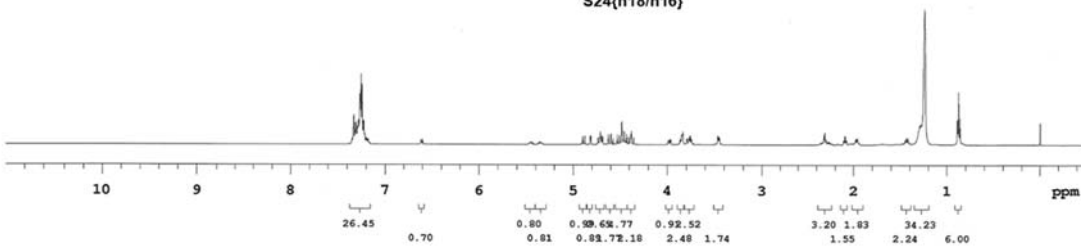

SHB\_14\_75C\_CDC13\_13C\_20160420\_300MHz\_exp5

171.19  
139.08  
138.87  
138.64  
138.19  
138.00  
128.52  
128.52  
128.44  
128.44  
128.39  
128.20  
128.13  
128.01  
127.98  
127.78  
127.69  
124.60  
96.79  
89.05  
87.65  
77.43  
77.23  
75.83  
75.06  
74.94  
73.46  
73.17  
71.67  
69.75  
69.04  
68.73  
68.73  
52.51  
41.73  
35.03  
31.92  
29.90  
29.87  
29.57  
29.57  
29.37  
28.61  
27.67  
22.90  
18.39  
14.33

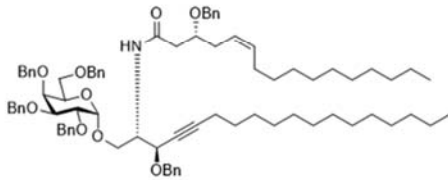

S24(n18/n16)

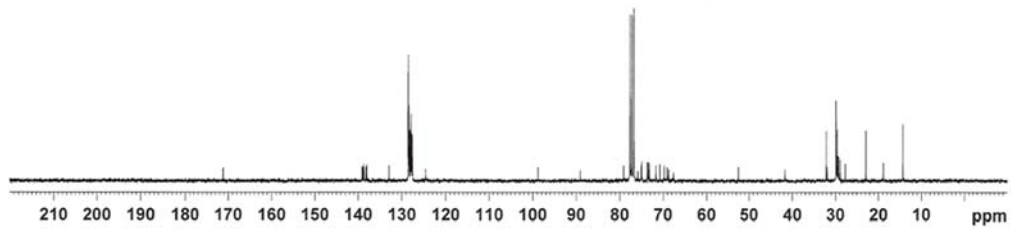



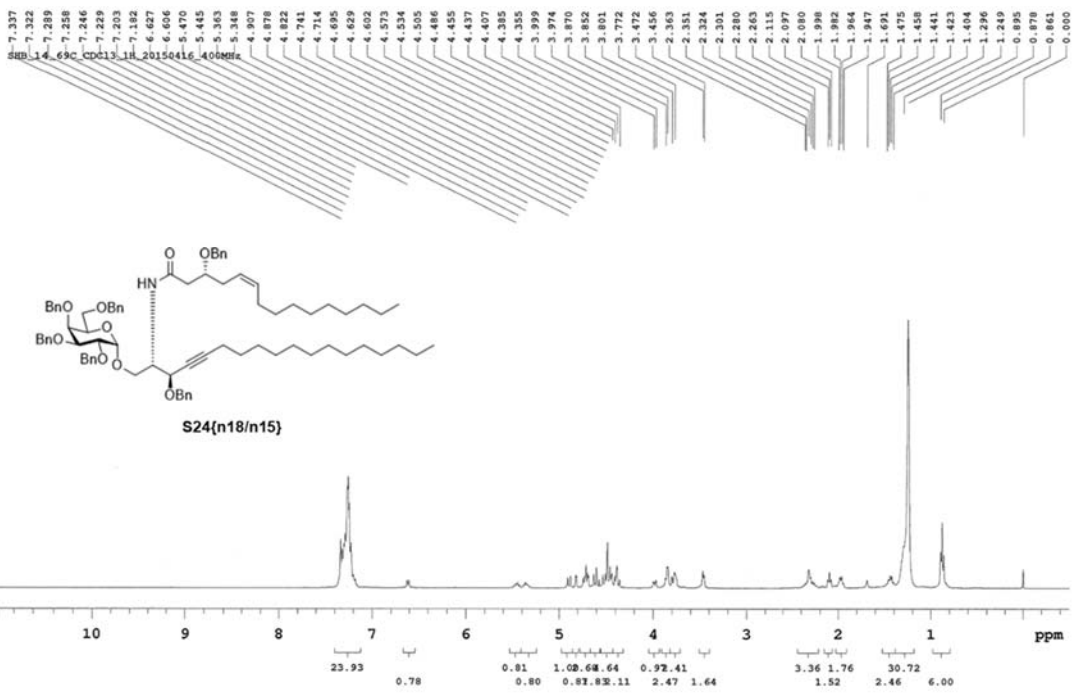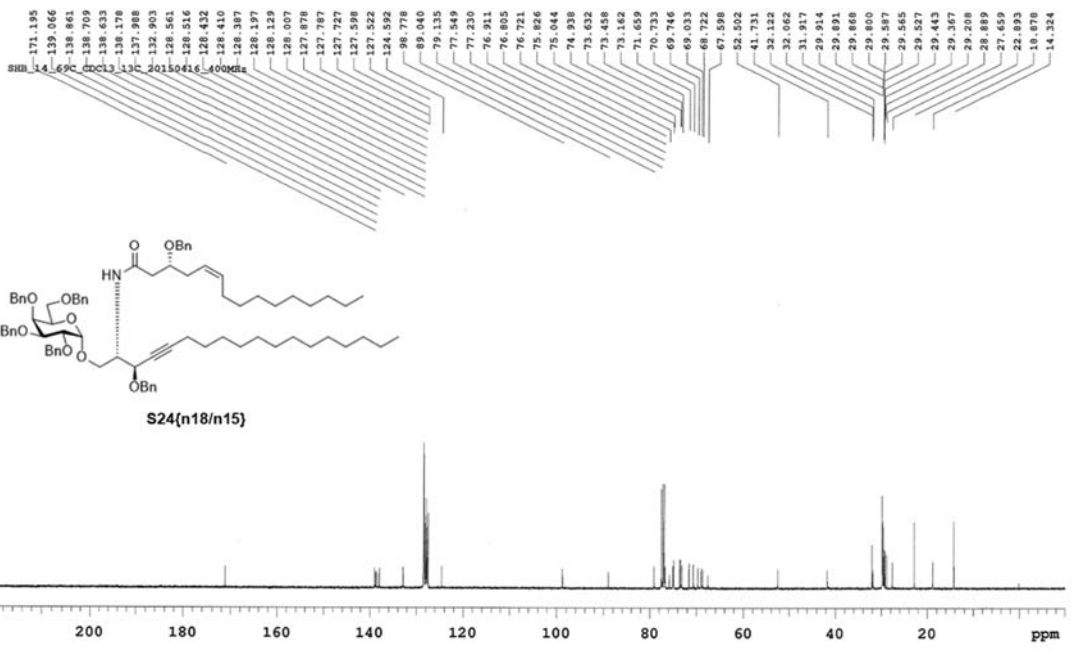

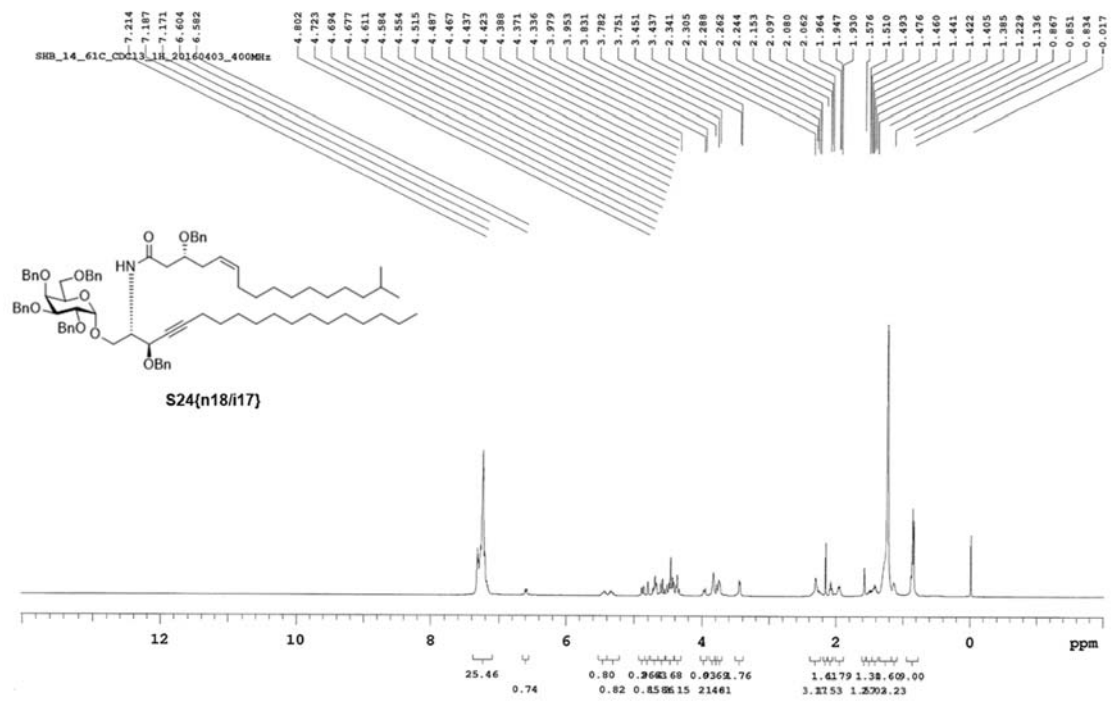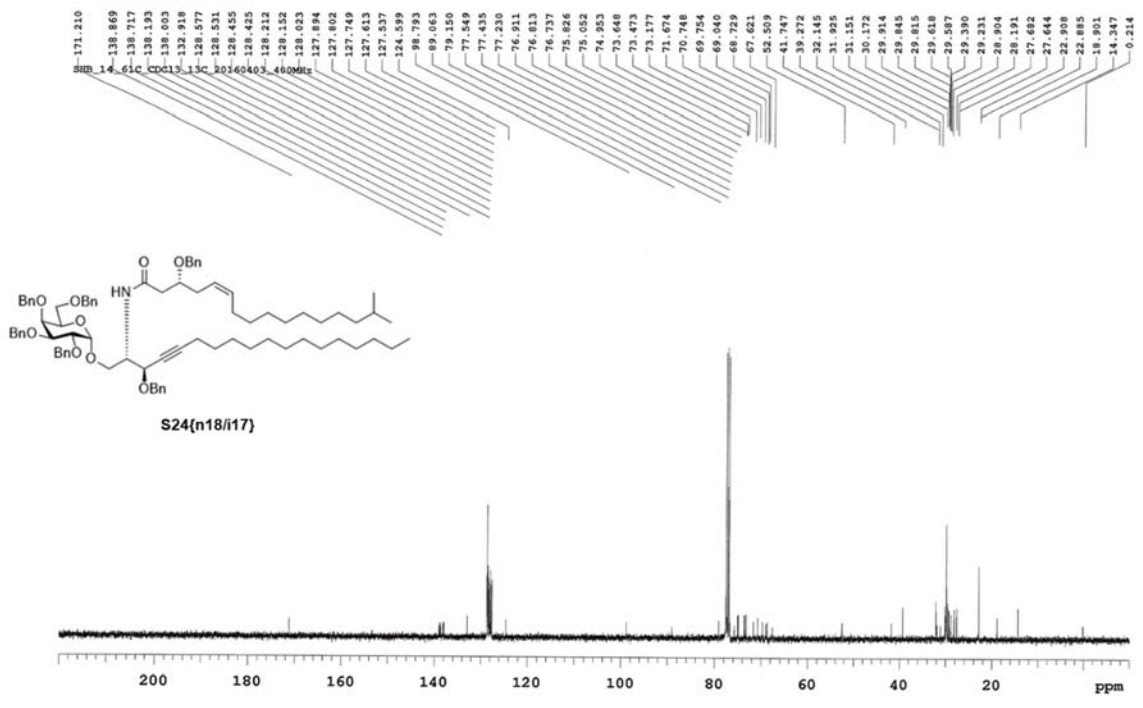

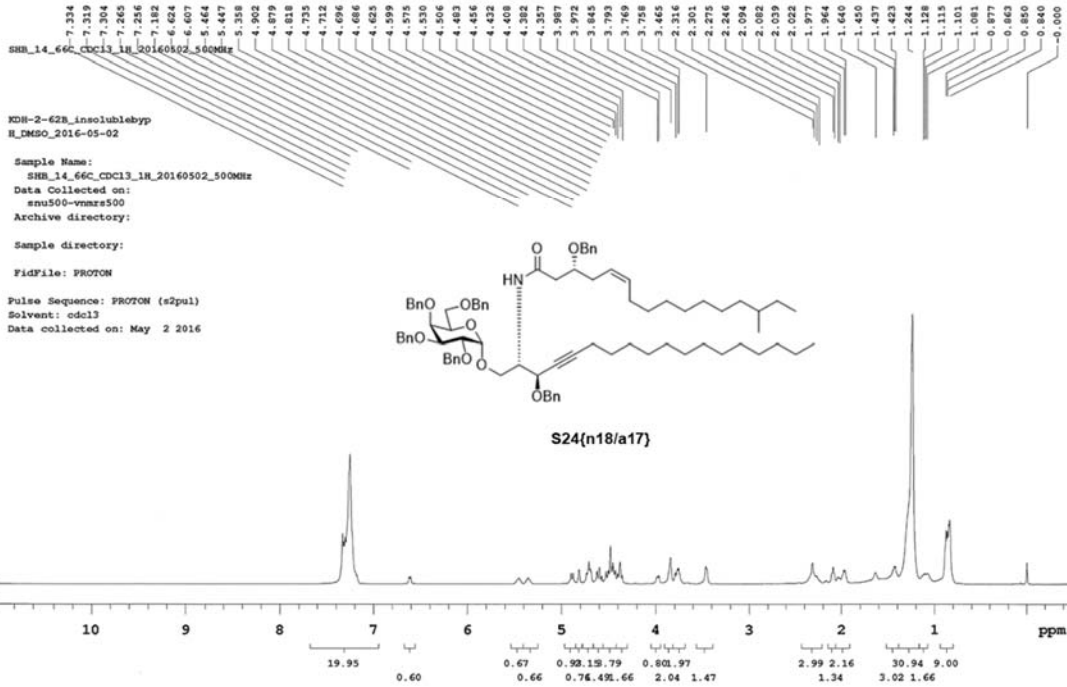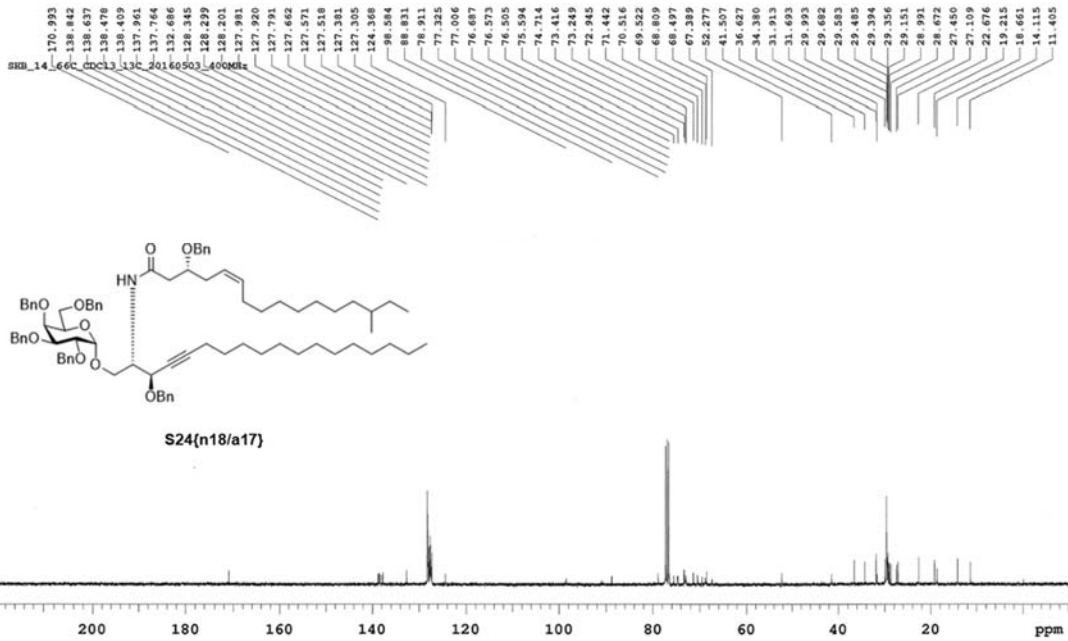

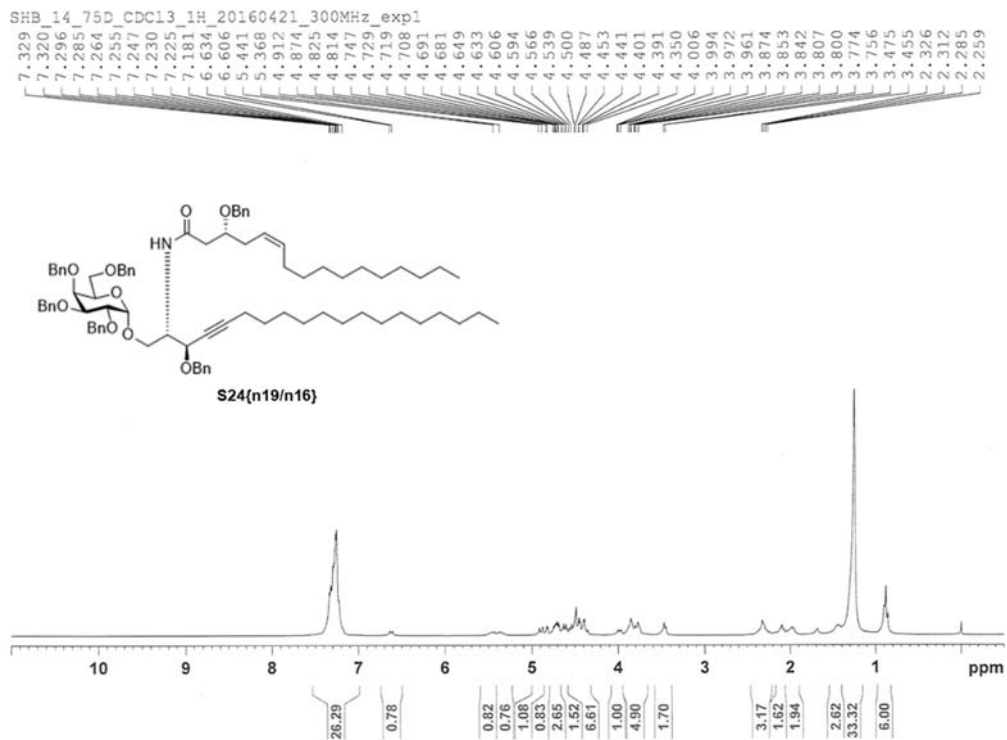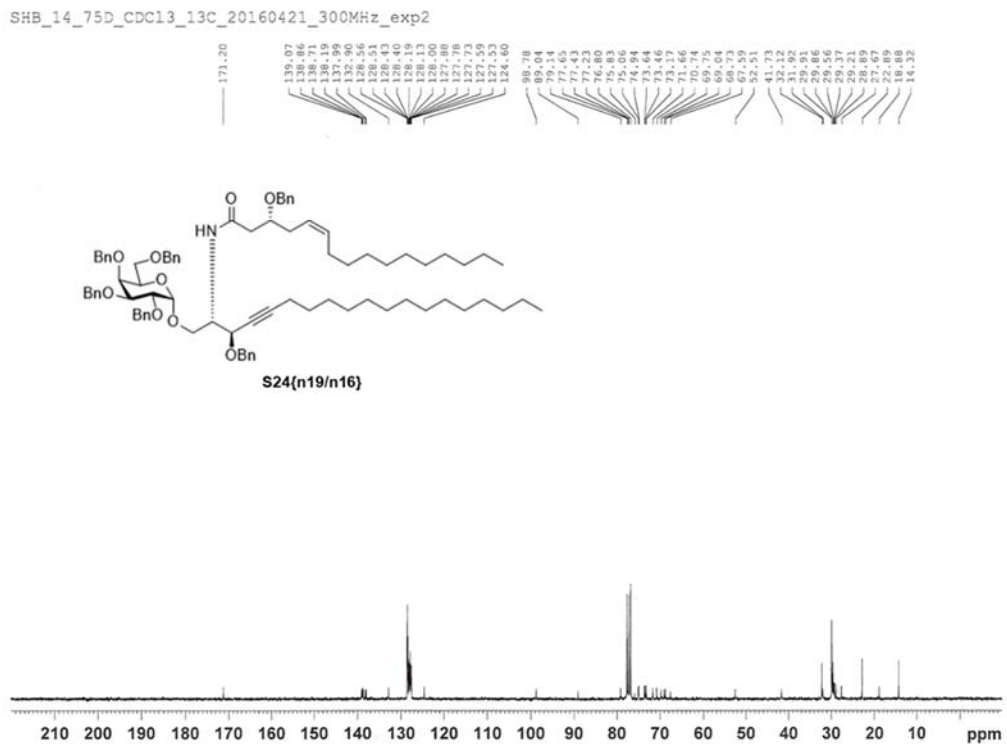

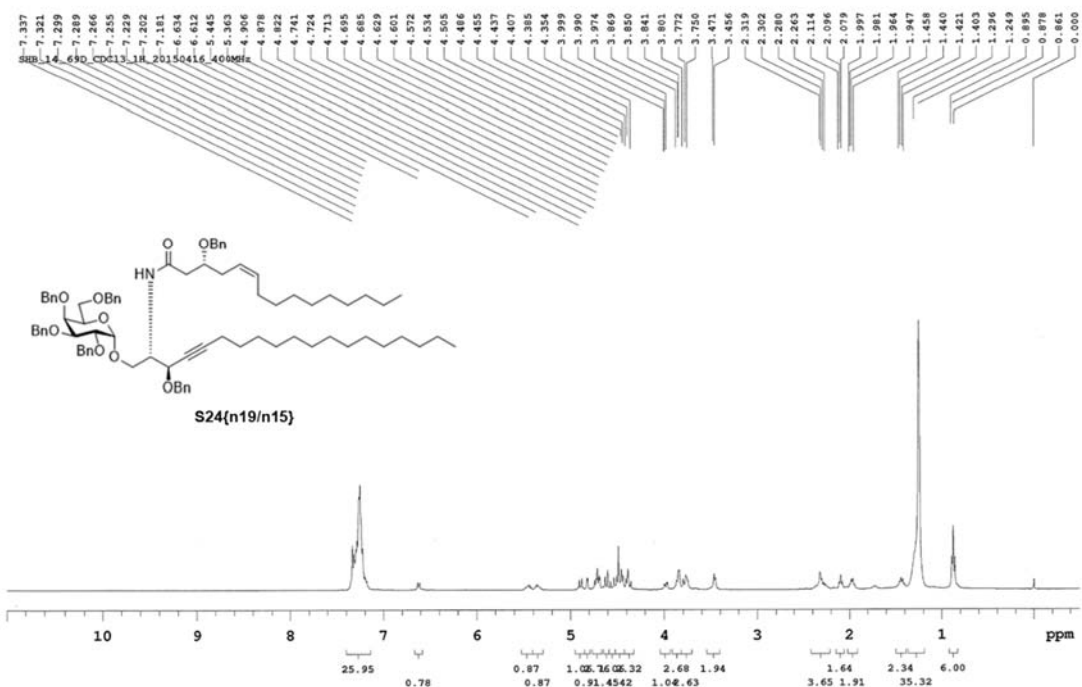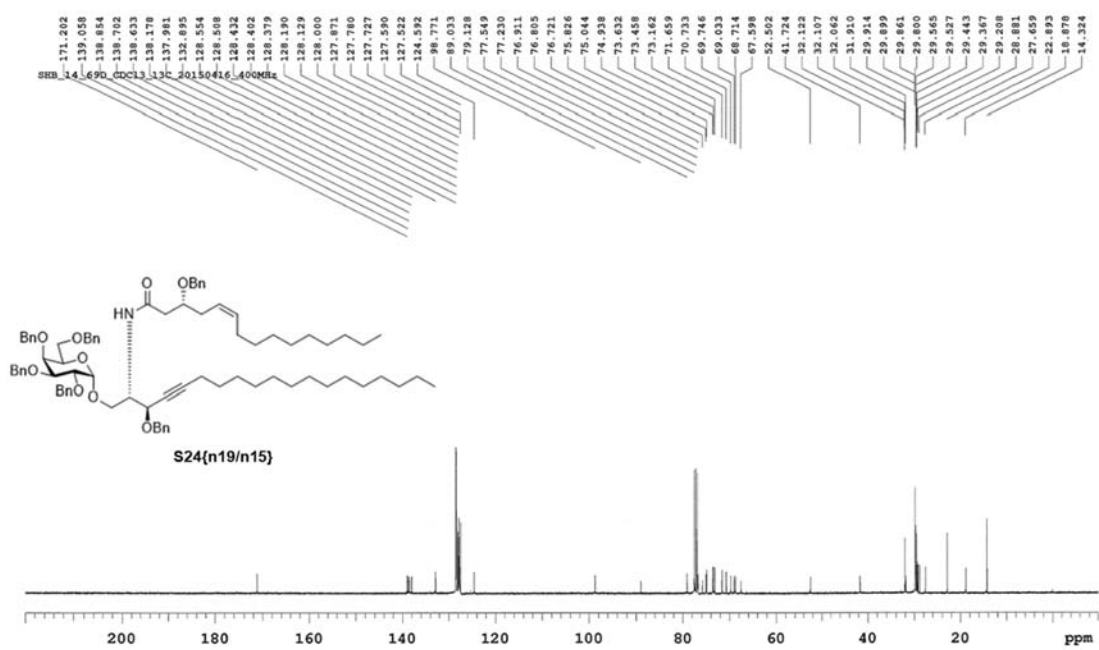

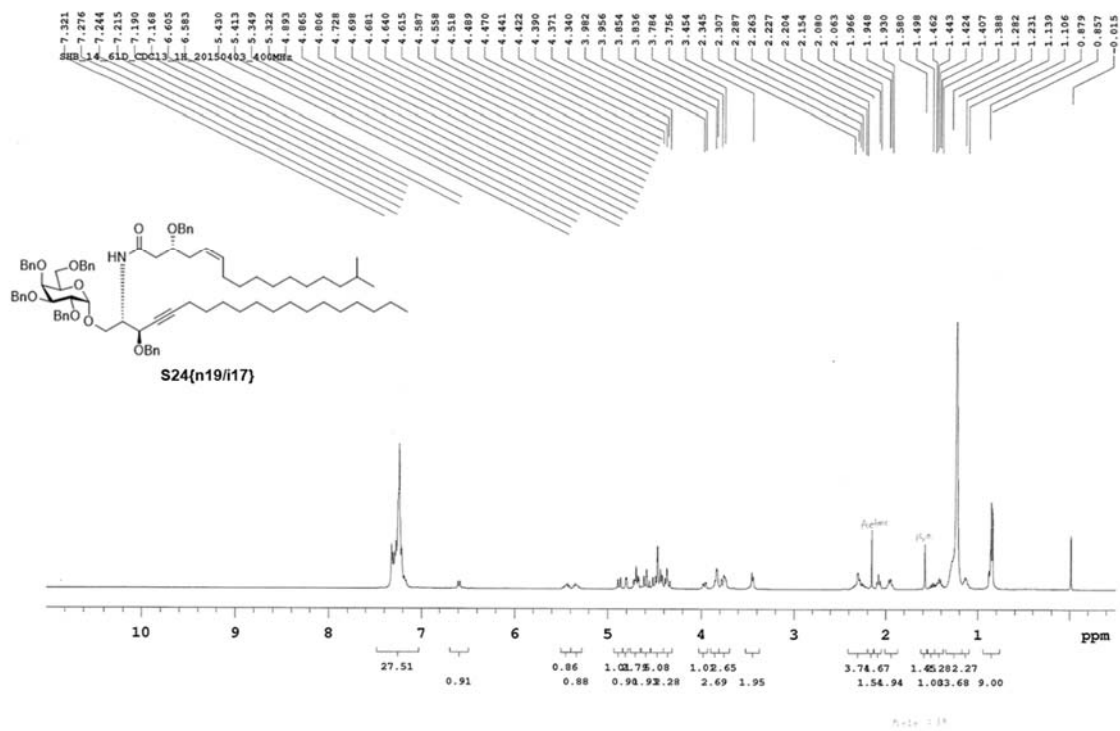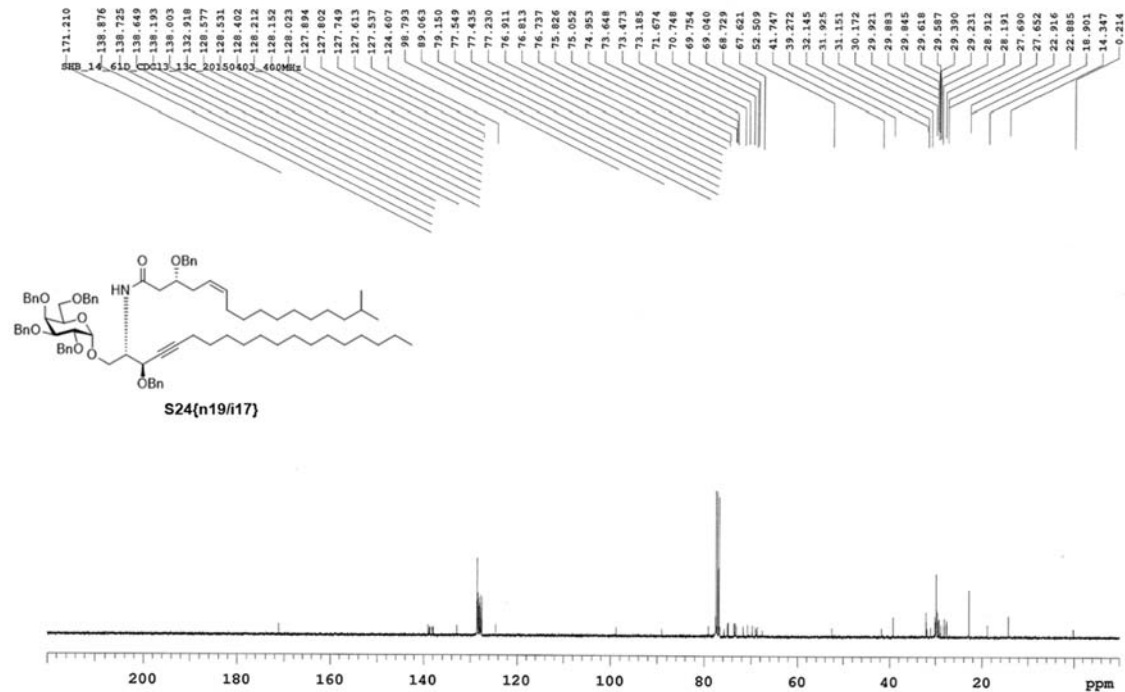

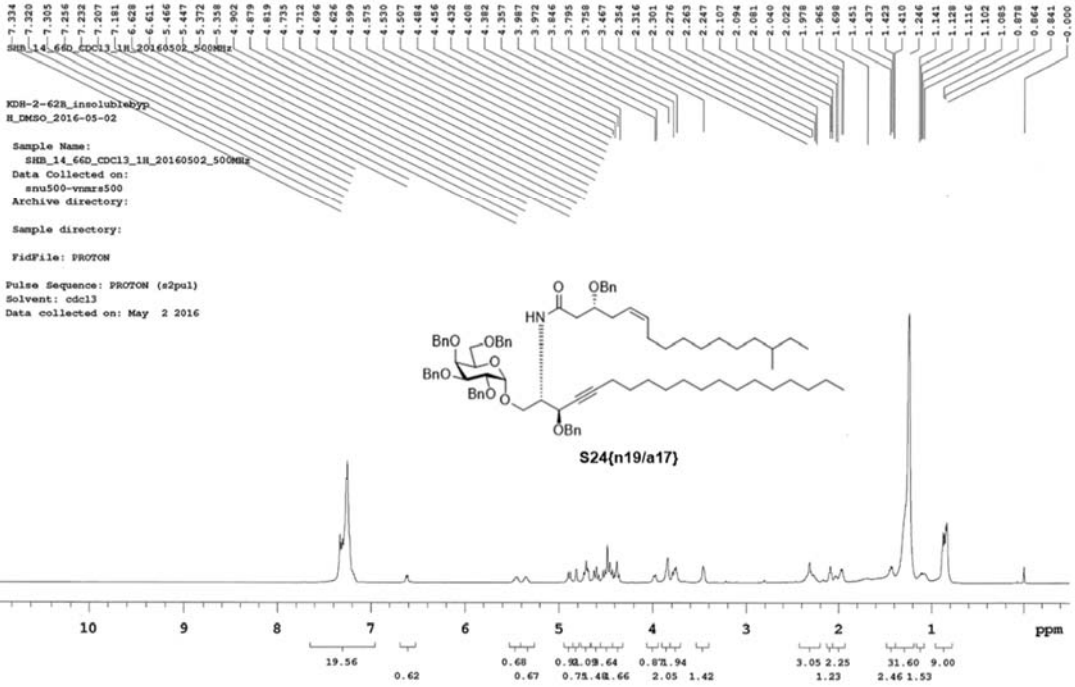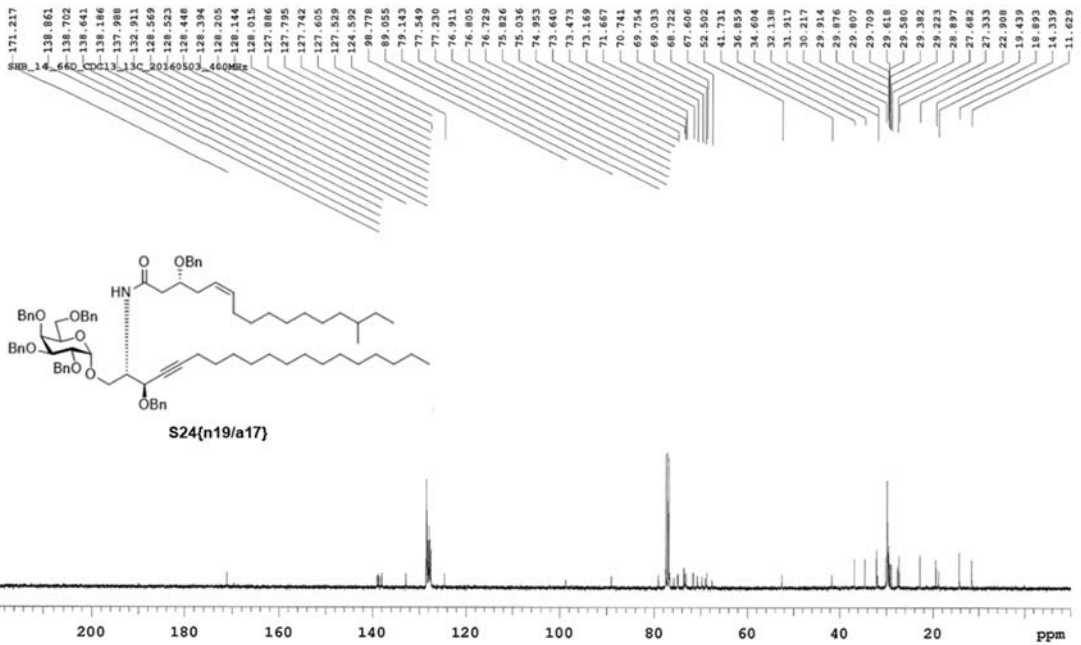

SHB\_14\_75A\_CDCl3\_1H\_20160420\_300MHz\_exp2

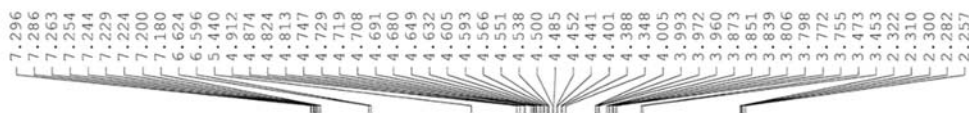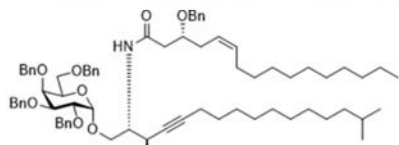

S24(17/n16)

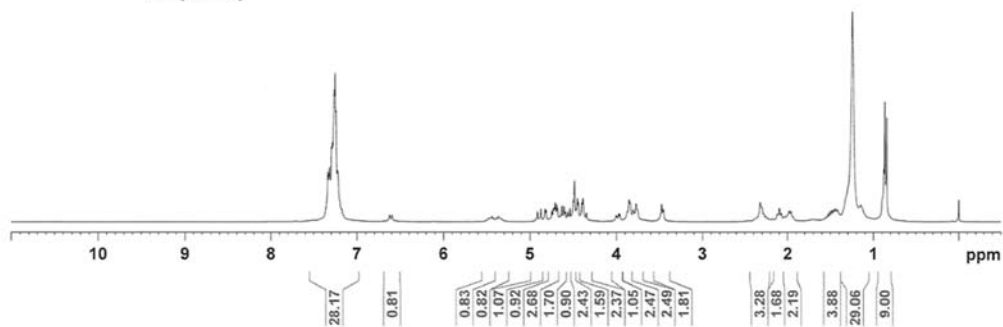

SHB\_14\_75A\_CDCl3\_13C\_20160420\_300MHz\_exp1

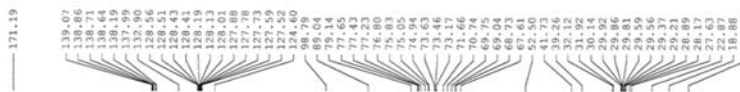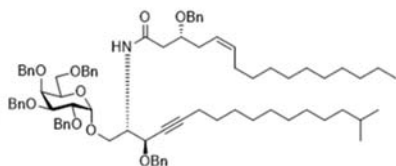

S24(17/n16)

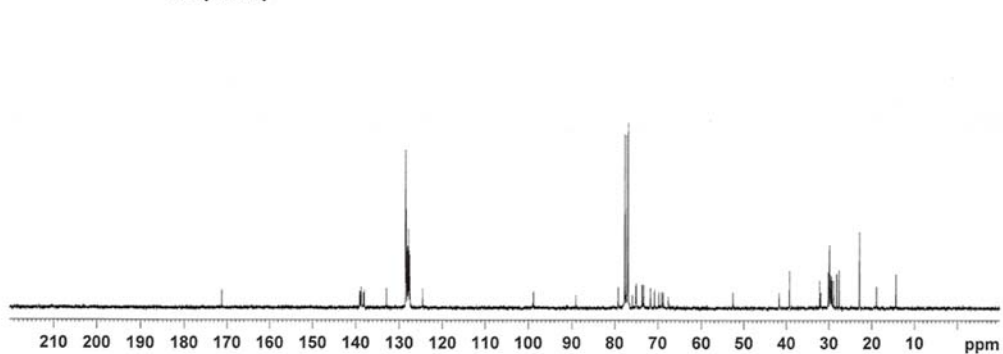



SHB\_14\_69A\_CDCl3\_1H\_20160420\_300MHz\_exp6

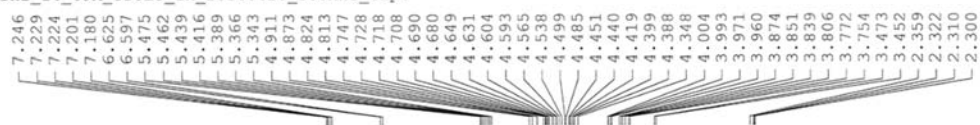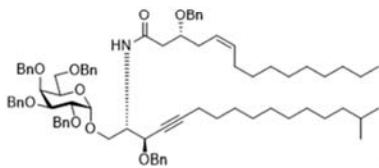

S24(i17/m15)

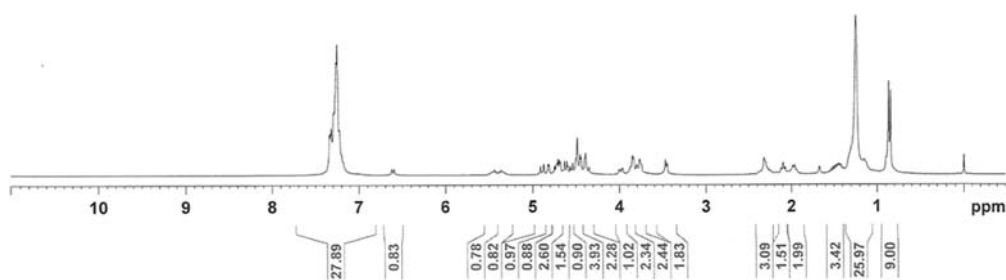

SHB\_14\_69A\_CDCl3\_13C\_20160420\_300MHz\_exp7

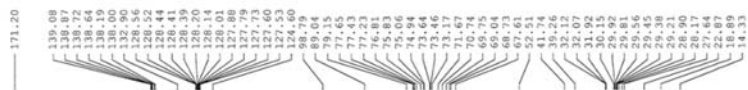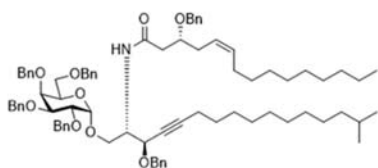

S24(i17/m15)

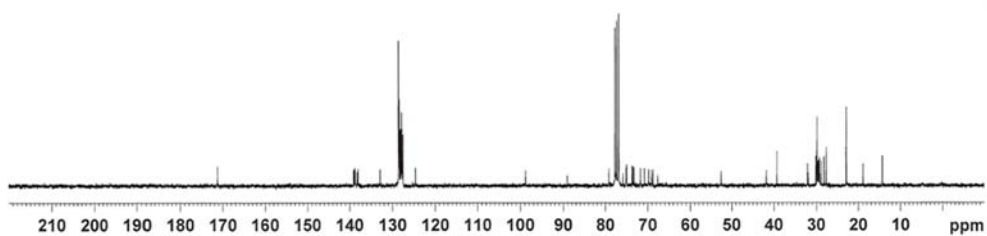

SHB\_13\_97\_CDCl3\_1H\_20160129\_500MHz

7.254  
7.233  
7.207  
7.181  
6.616  
6.599  
5.444  
5.359  
4.903  
4.880  
4.820  
4.737  
4.714  
4.697  
4.662  
4.626  
4.600  
4.576  
4.554  
4.531  
4.507  
4.484  
4.456  
4.433  
4.409  
4.381  
4.357  
3.993  
3.973  
3.862  
3.840  
3.796  
3.759  
3.727  
3.697  
3.232  
2.314  
2.275  
2.246  
2.173  
2.095  
2.043  
2.021  
1.963  
1.611  
1.535  
1.504  
1.439  
1.423  
1.393  
1.241  
1.144  
1.041  
0.988  
0.972  
0.955  
0.863  
0.000

Sample Name: KDN-2-31A benzylation\_H\_CDCl3\_2016-01-28  
 Data Collected on: wnu500-usar500  
 Archive directory:  
 Sample directory:  
 FidFile: PROTON

Pulse Sequence: PROTON (s2pul)  
 Solvent: cdcl3  
 Data collected on: Jan 29 2016

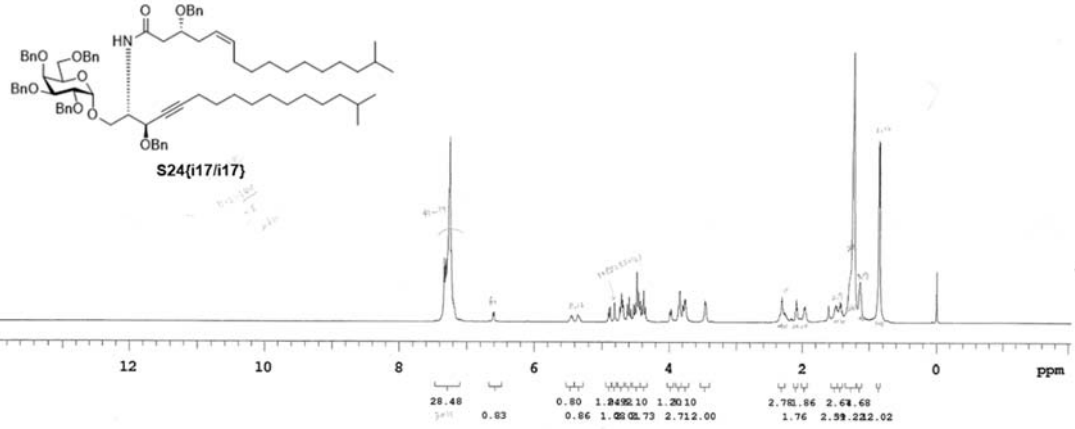

SHB\_13\_97\_CDCl3\_13C\_20160129\_300MHz\_exp3

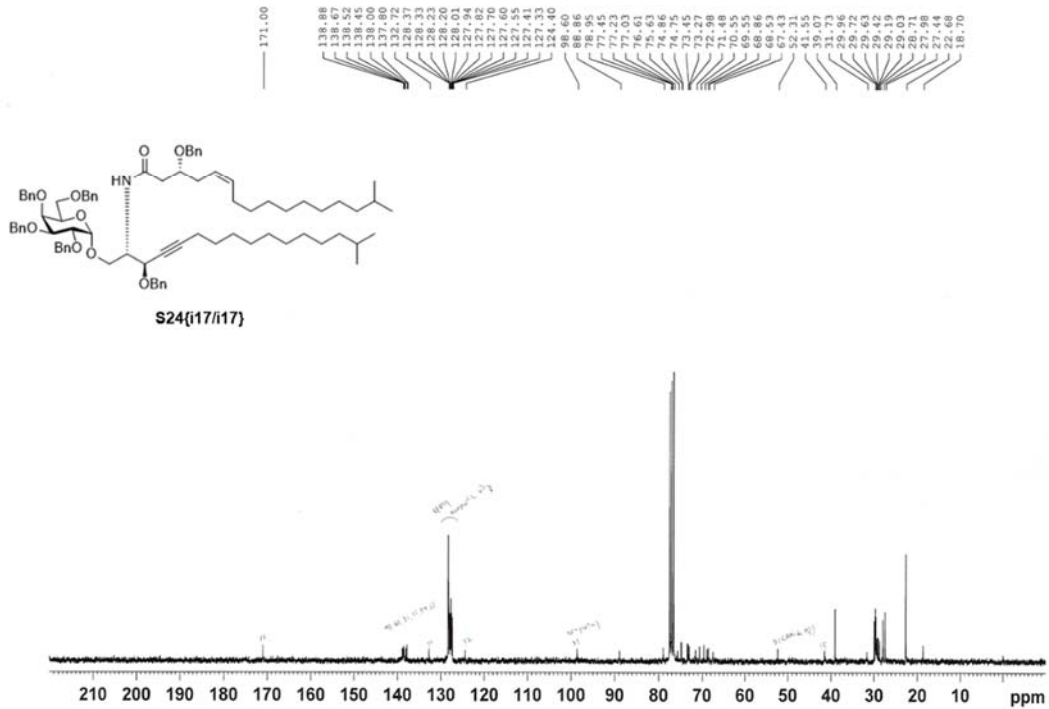

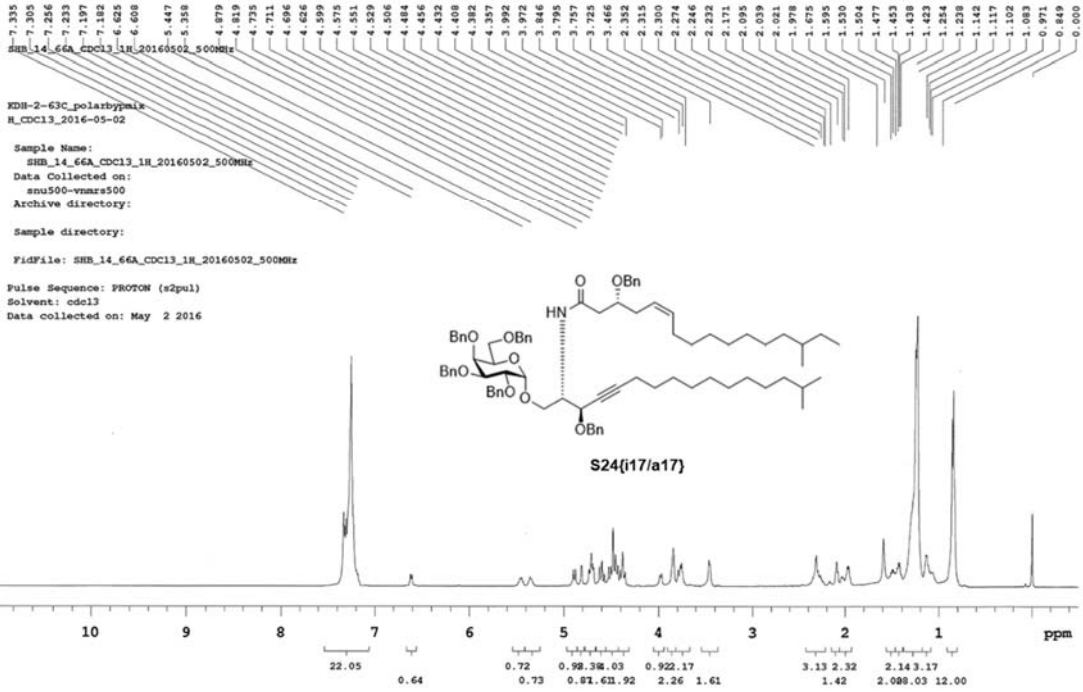

SHB\_14\_66A\_CDC13\_13C\_20160502\_300MHz\_exp1

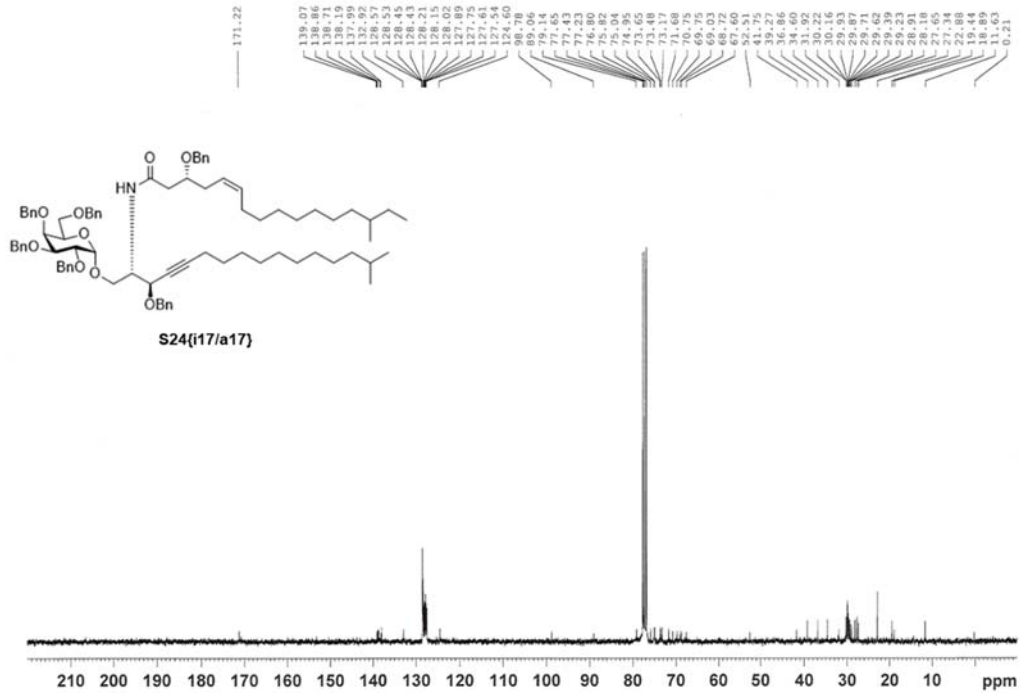

7.349  
7.333  
7.319  
7.304  
7.283  
7.269  
7.256  
7.243  
7.219  
7.205  
7.180  
6.624  
6.607  
4.903  
4.880  
4.822  
4.736  
4.713  
4.696  
4.643  
4.624  
4.599  
4.576  
4.551  
4.508  
4.485  
4.456  
4.434  
4.409  
4.382  
4.358  
3.988  
3.975  
3.864  
3.841  
3.793  
3.765  
3.470  
2.338  
2.316  
2.202  
2.276  
2.111  
2.097  
2.064  
1.991  
1.978  
1.964  
1.950  
1.455  
1.440  
1.425  
1.294  
1.248  
1.125  
1.112  
1.097  
1.072  
0.891  
0.879  
0.862  
0.847  
0.828  
-0.000

Sample Name: SHB\_14\_75B\_CDC13\_1H\_20150420\_500MHz  
Data Collected On: smu500-vvmsa500  
Archive directory:  
Sample directory:  
FidFile: PROTON  
Pulse Sequence: PROTON (s2pul)  
Solvent: cdcl3  
Data collected on: Apr 20 2016

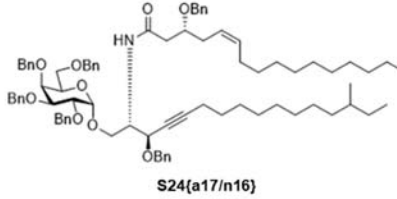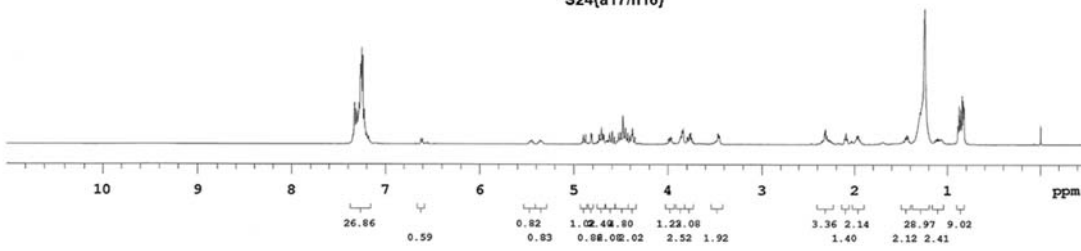

SHB\_14\_75B\_CDC13\_13C\_20160420\_300MHz\_exp4

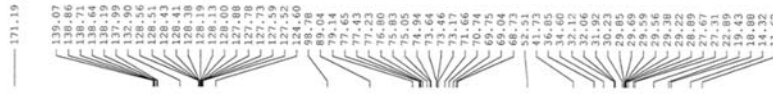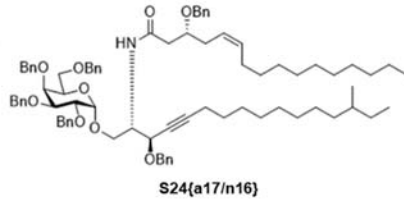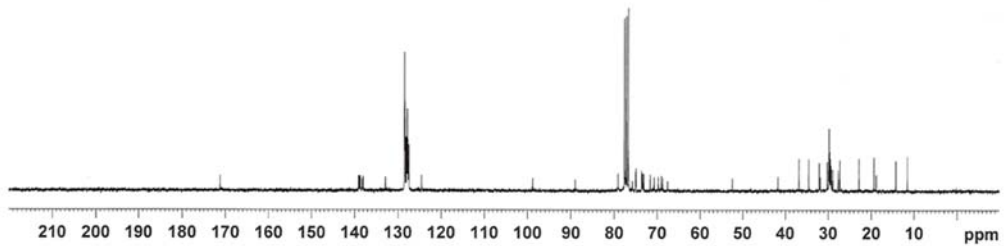

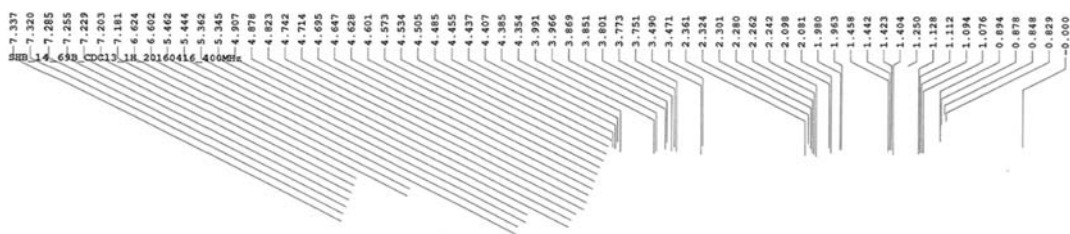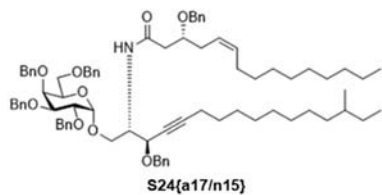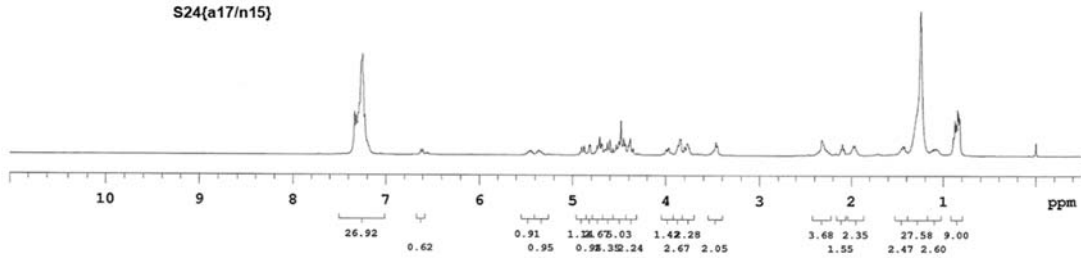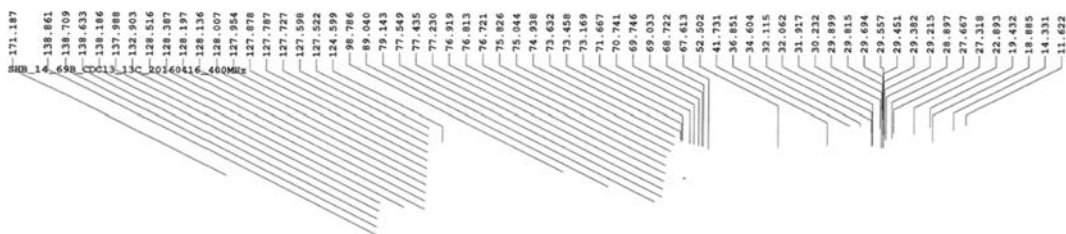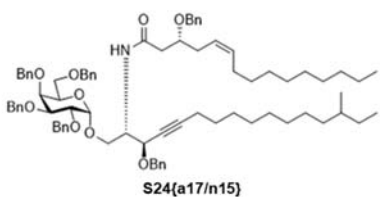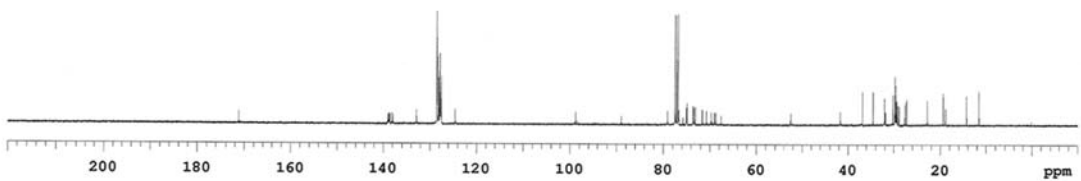

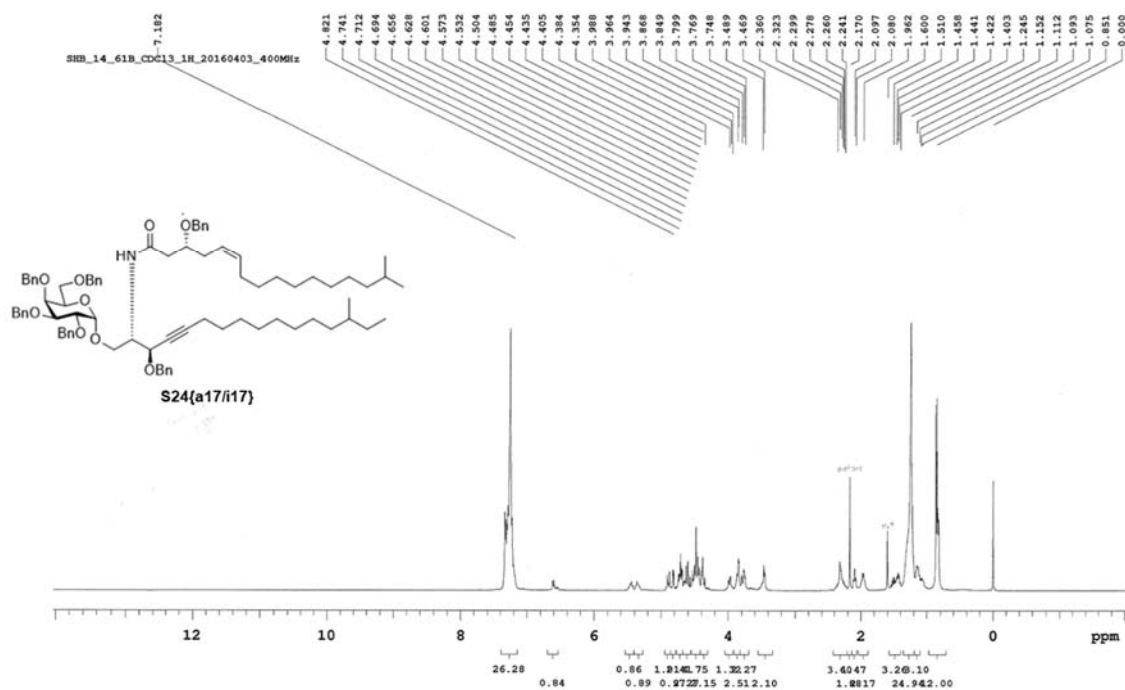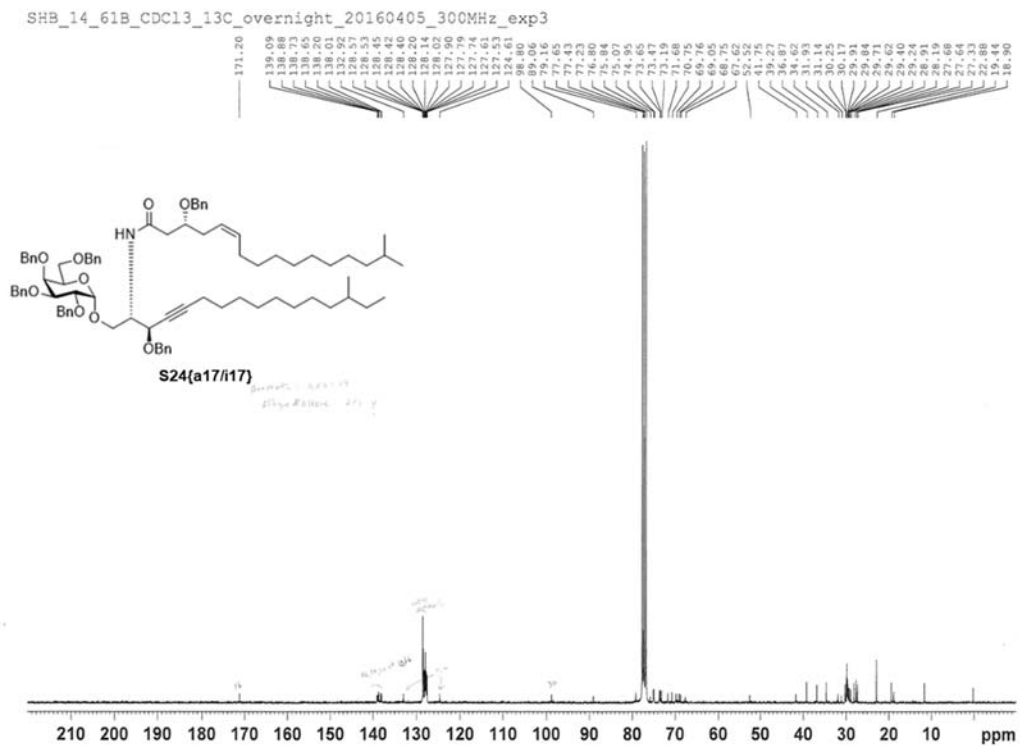

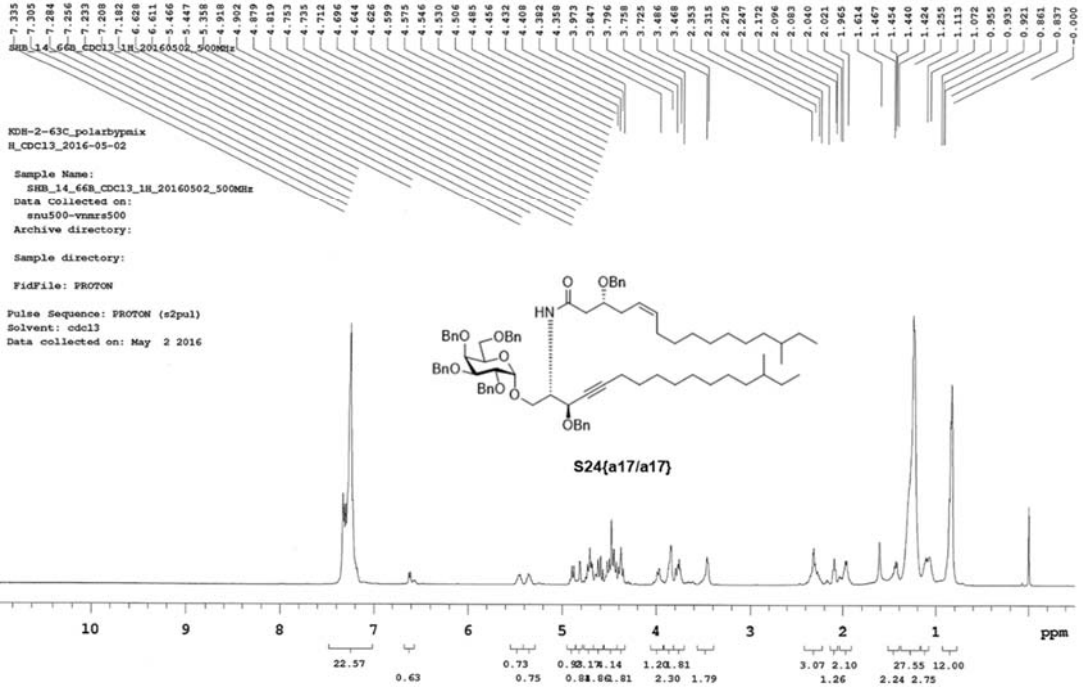

SHB\_14\_66B\_CDC13\_13C\_overnight\_20160504\_300MHz\_exp1

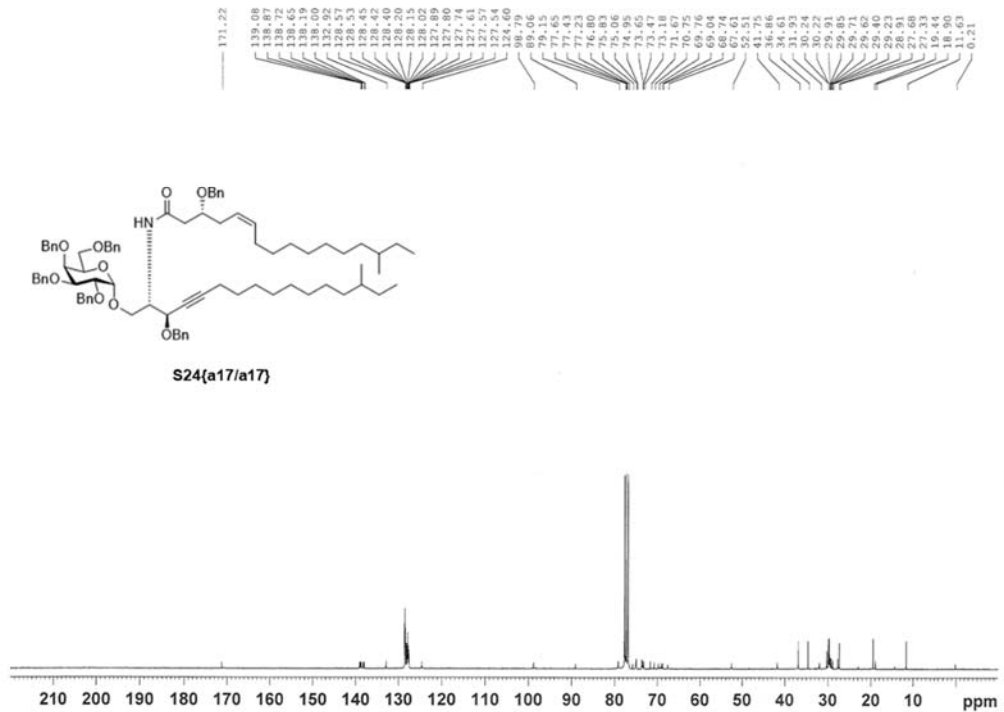

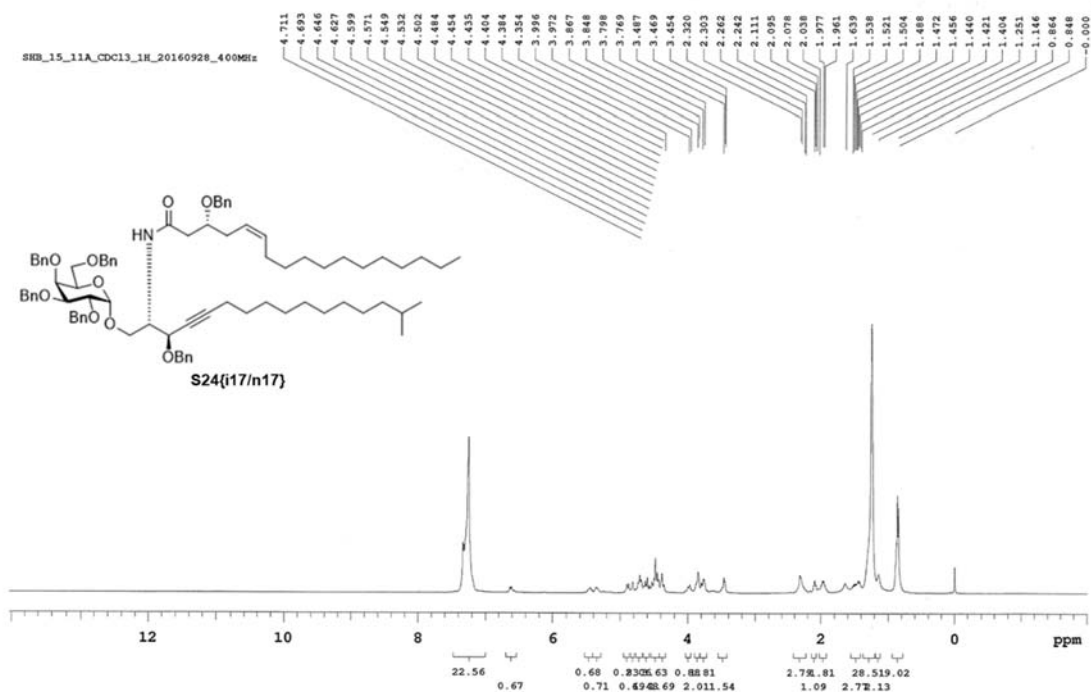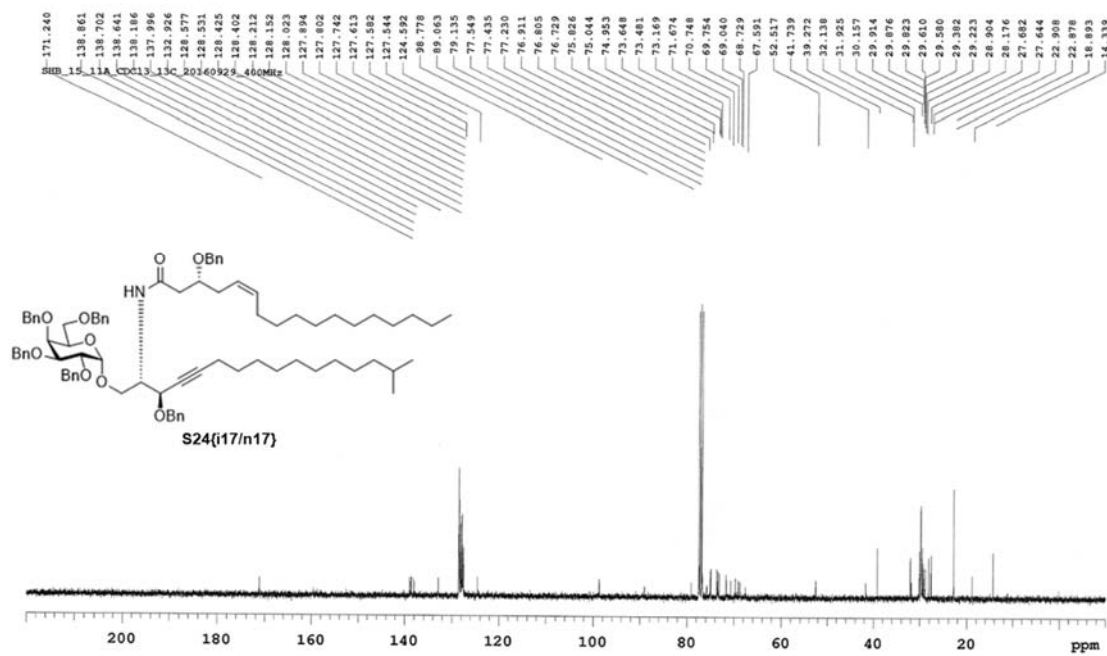



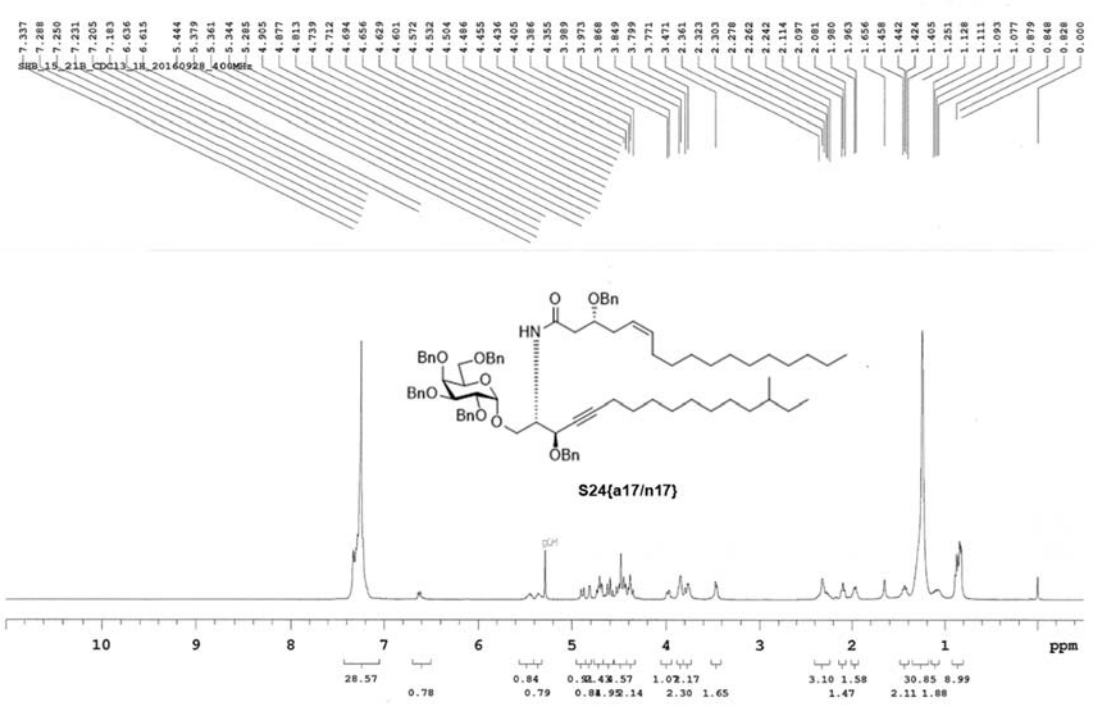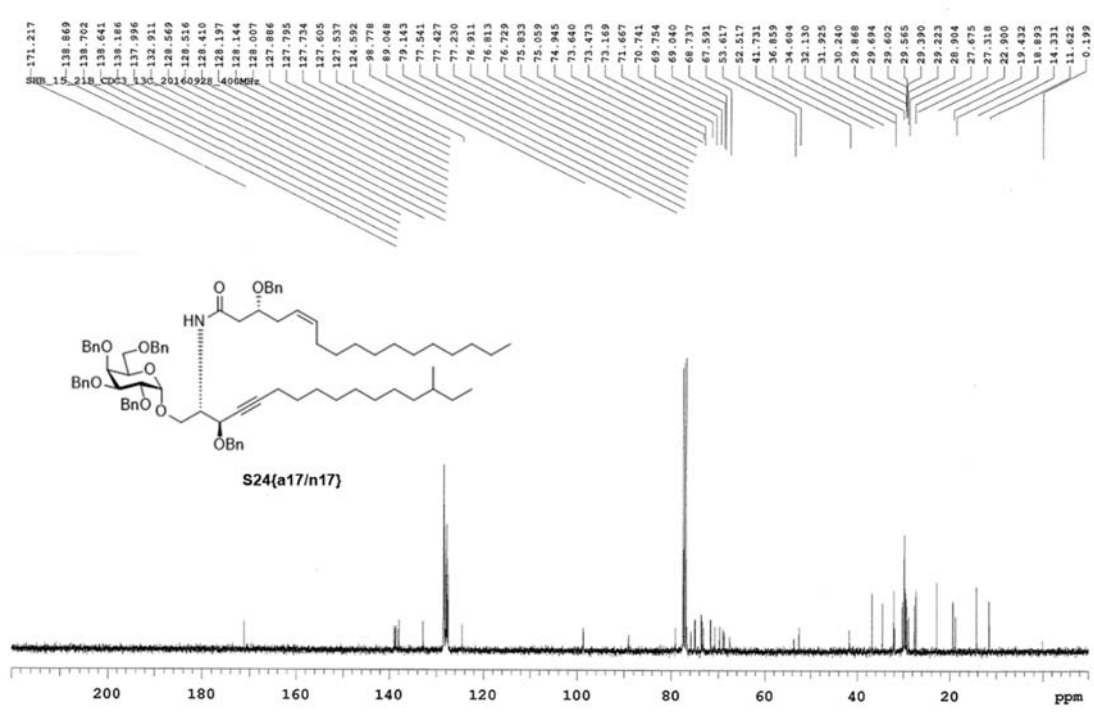

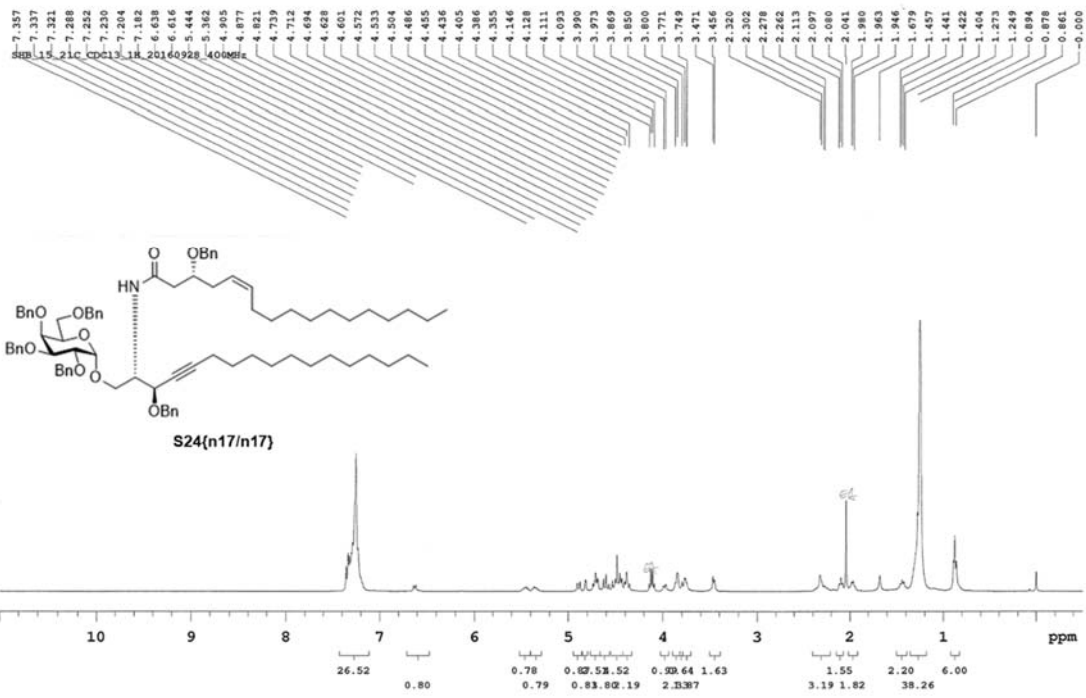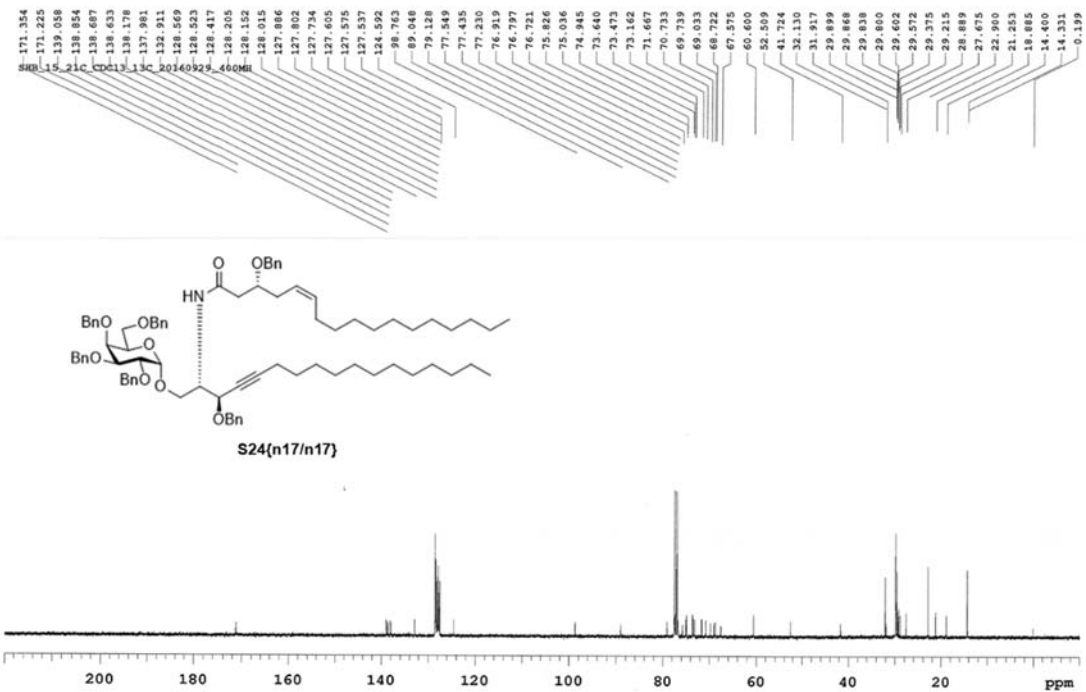

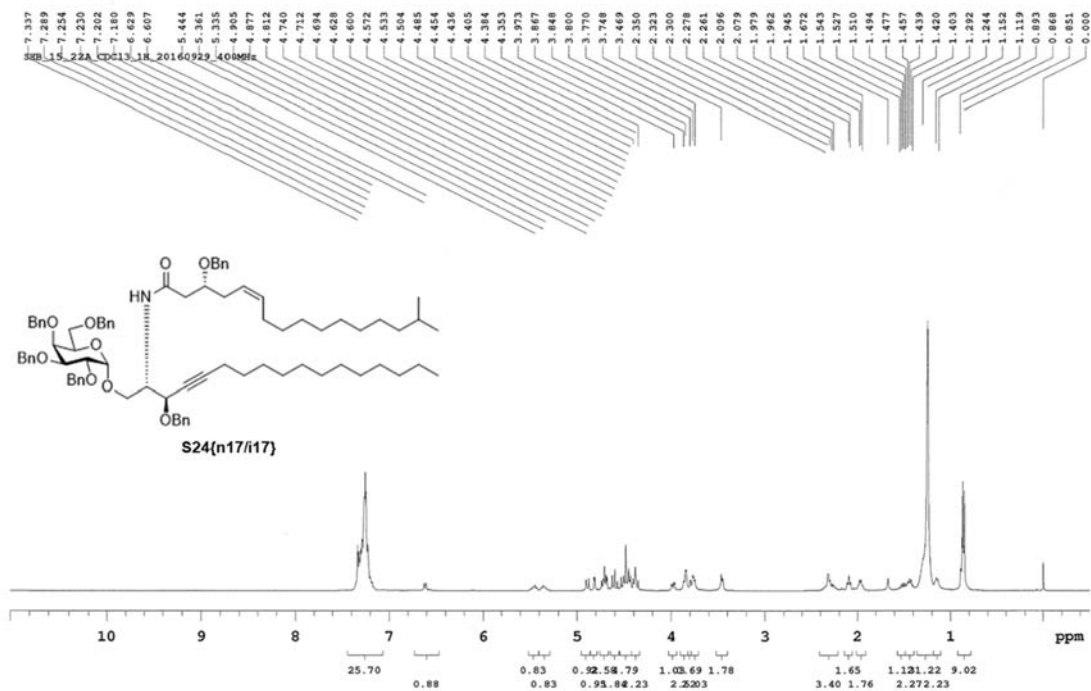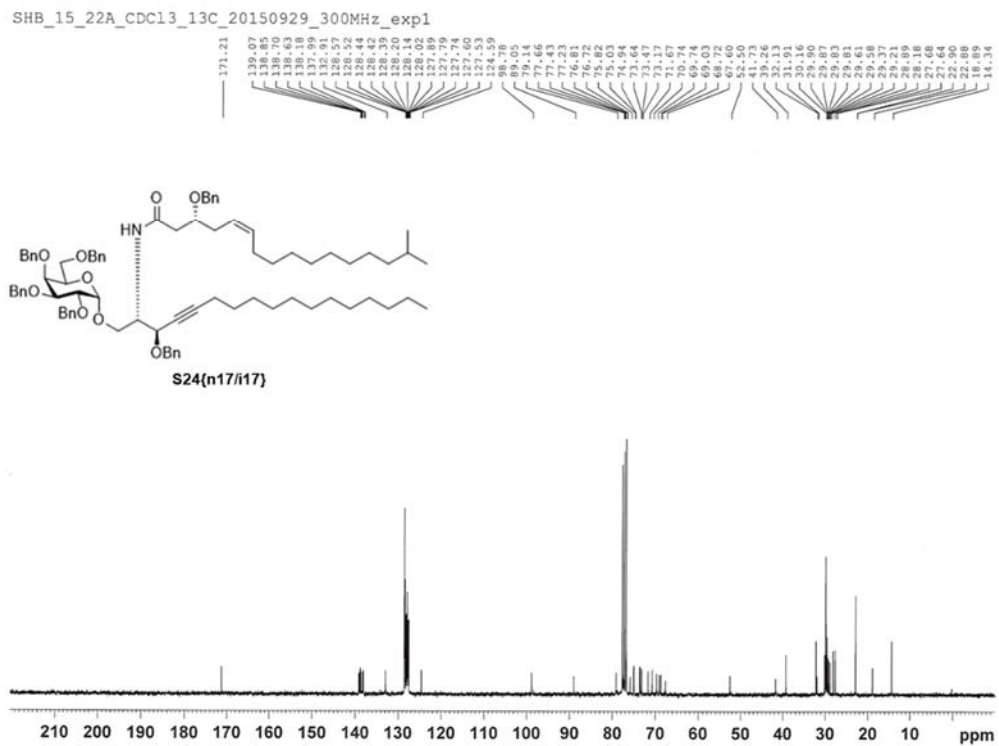

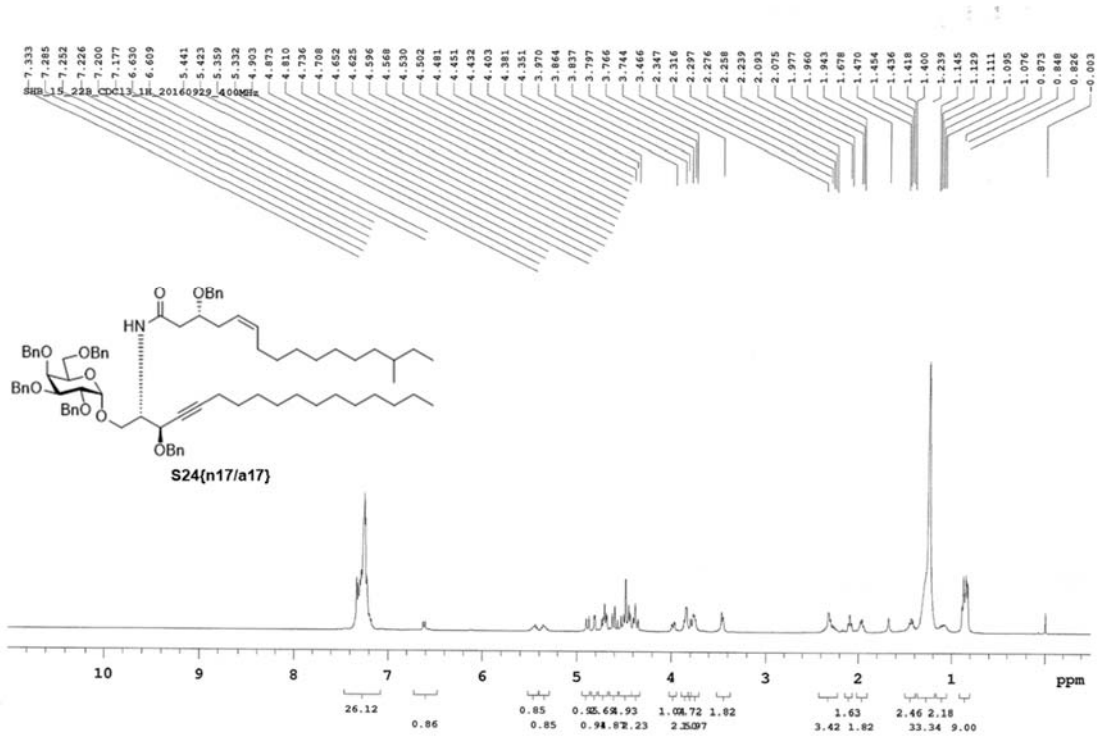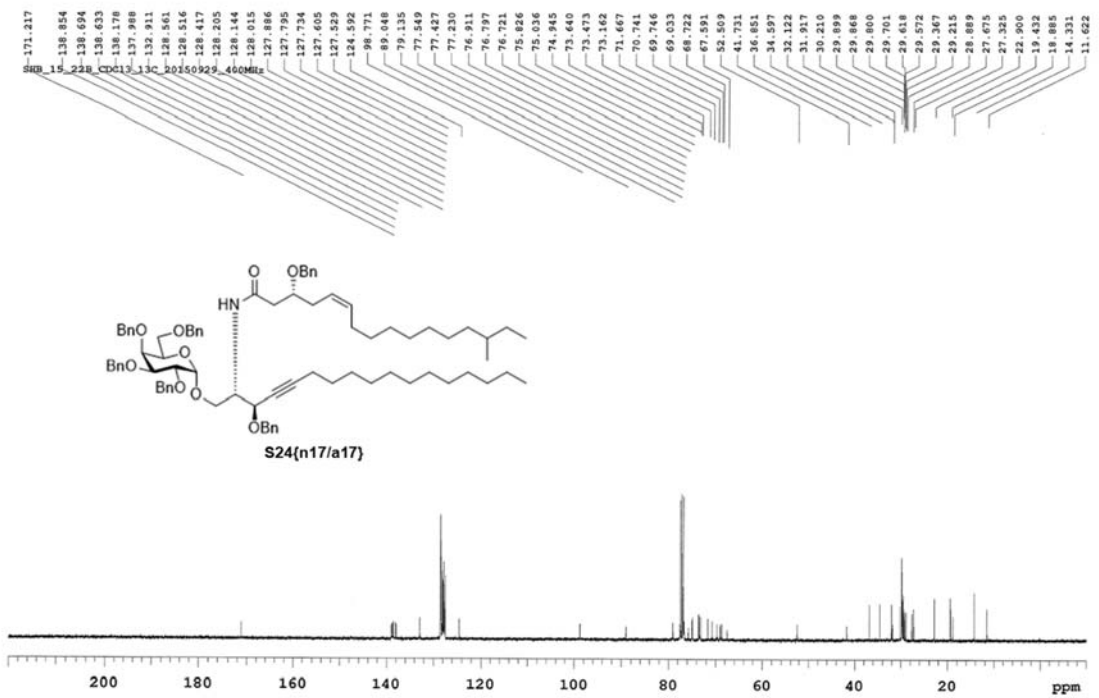





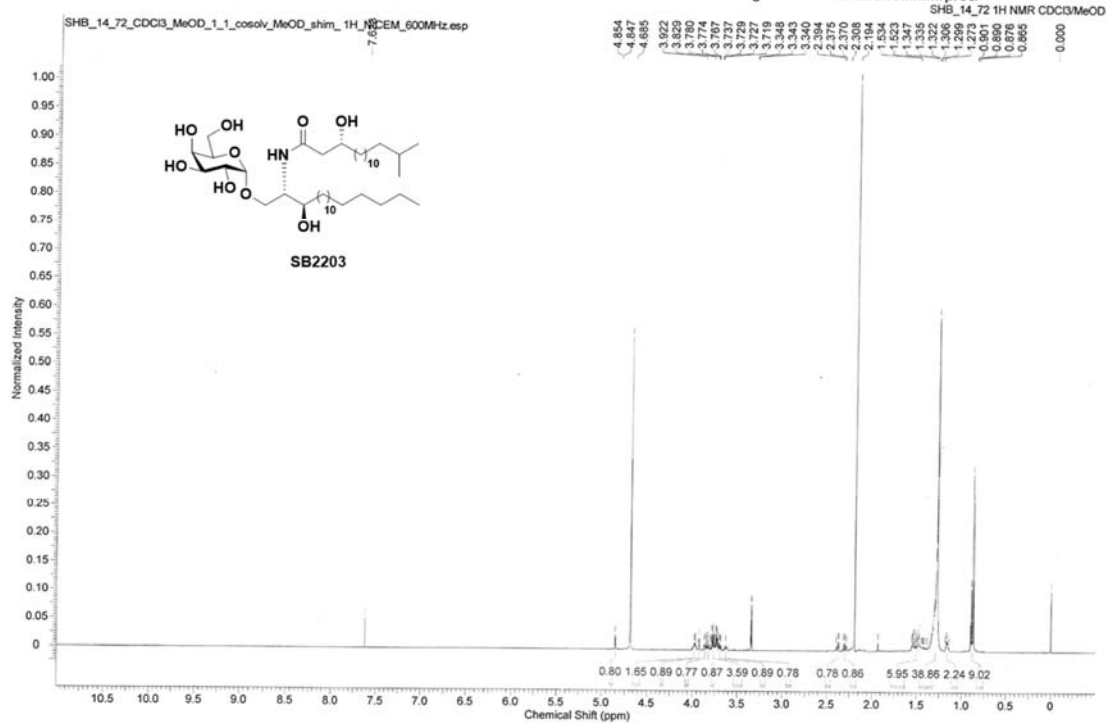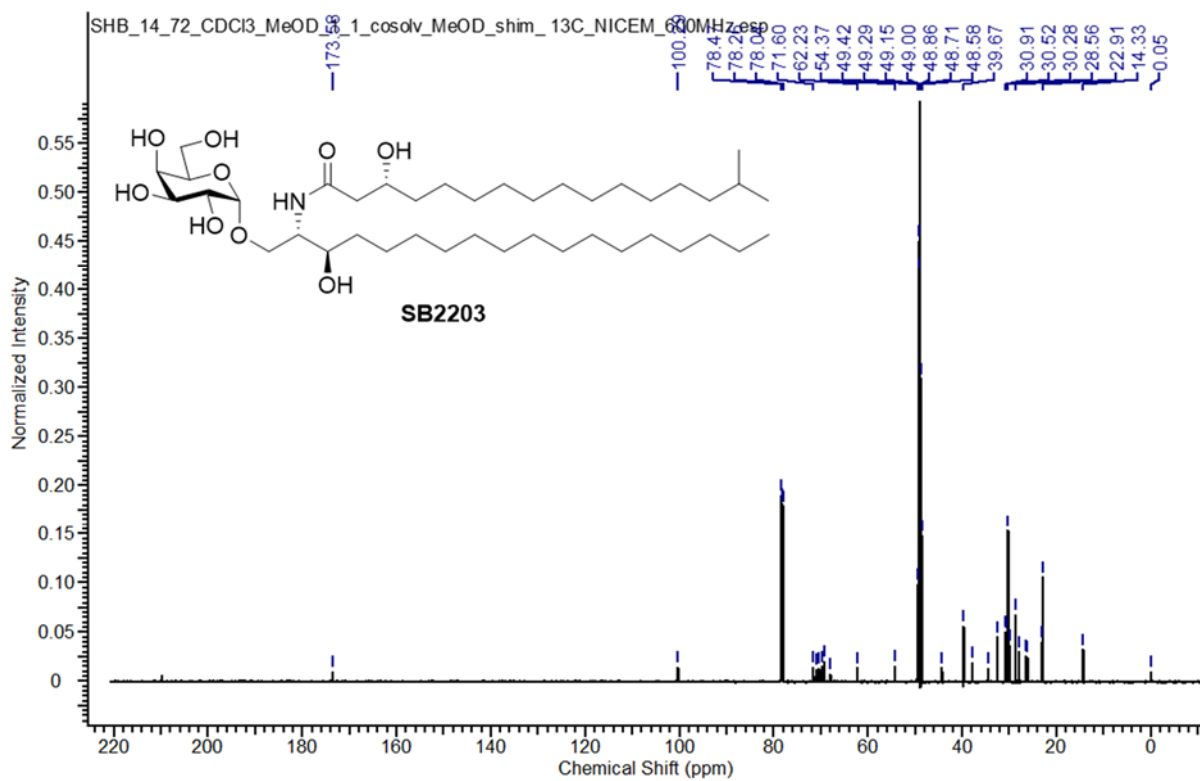

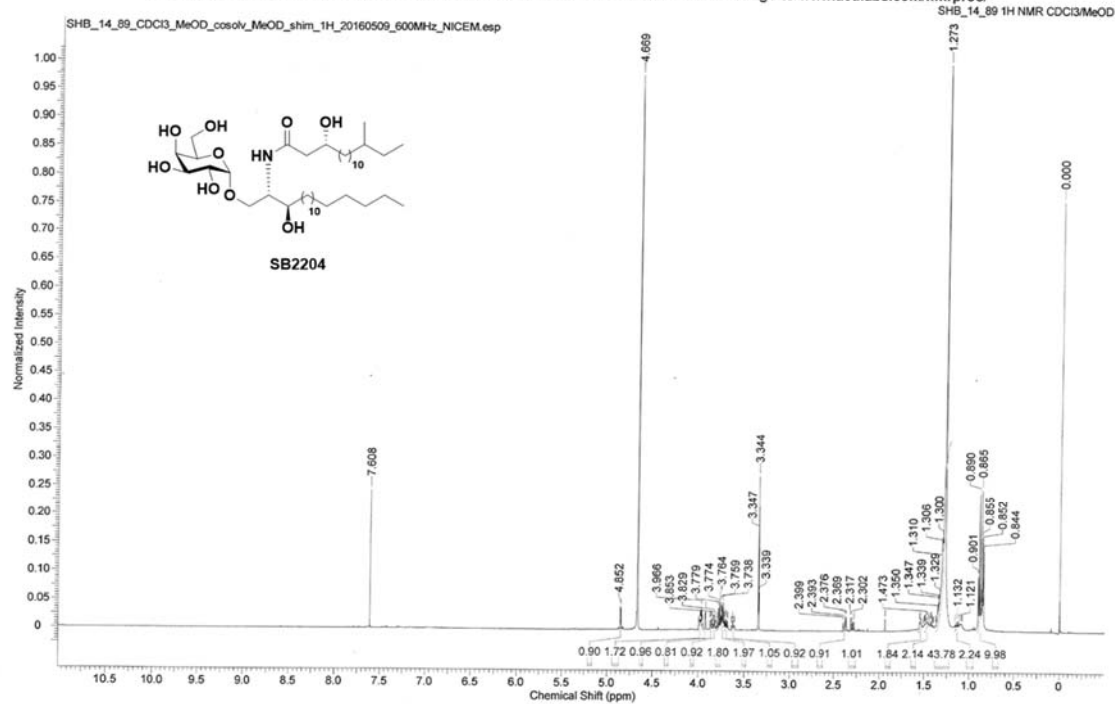

D:\Data\NMR&MALDI\p.1\NICEM\_NMR\SHB051016\SHB\_14\_89\_CDCl3\_MeOD\_cosolv\_MeOD\_shim\_1H\_20160509\_600MHz\_NICEM.esp

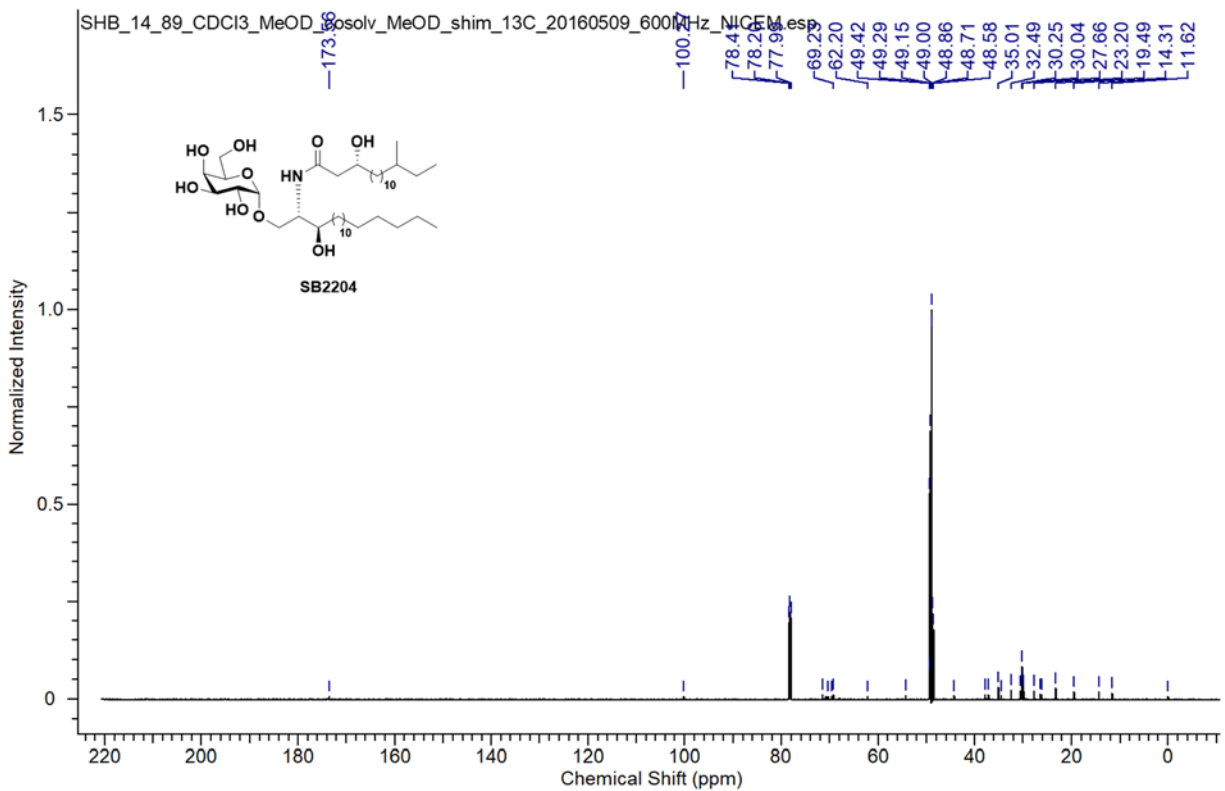



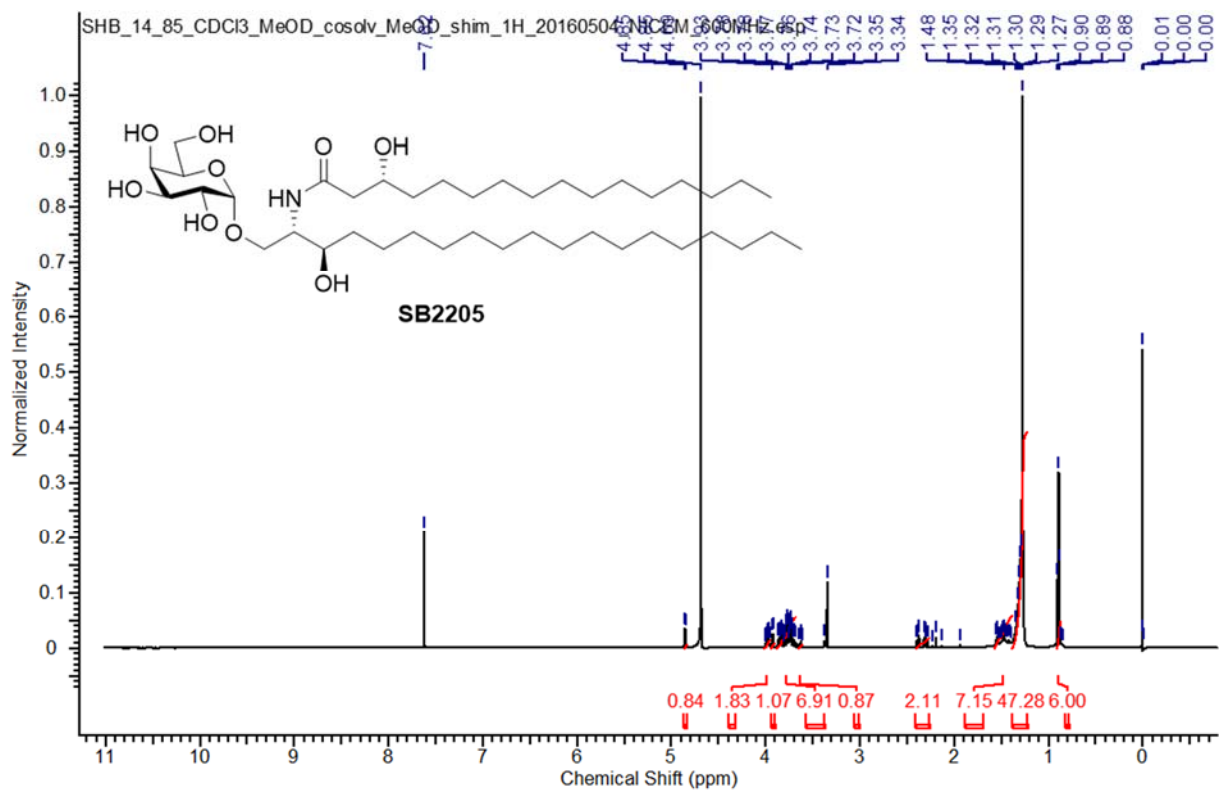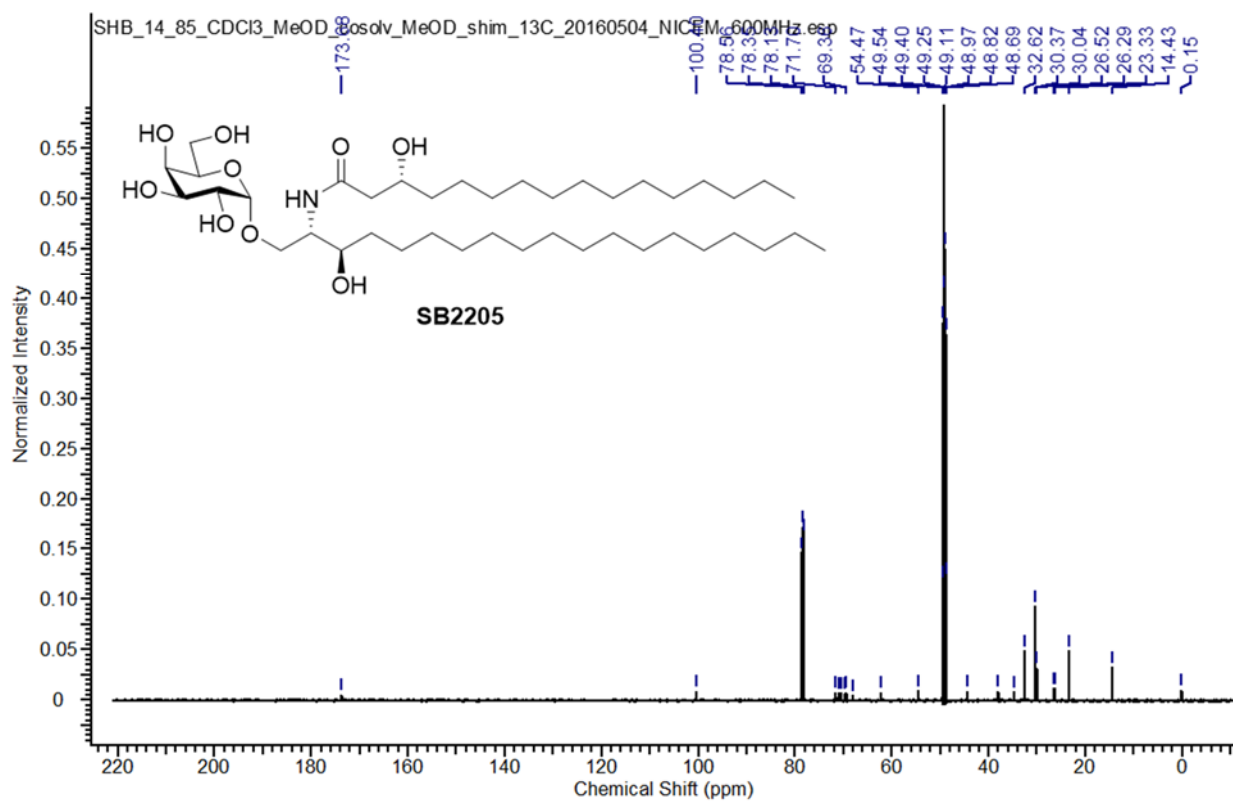

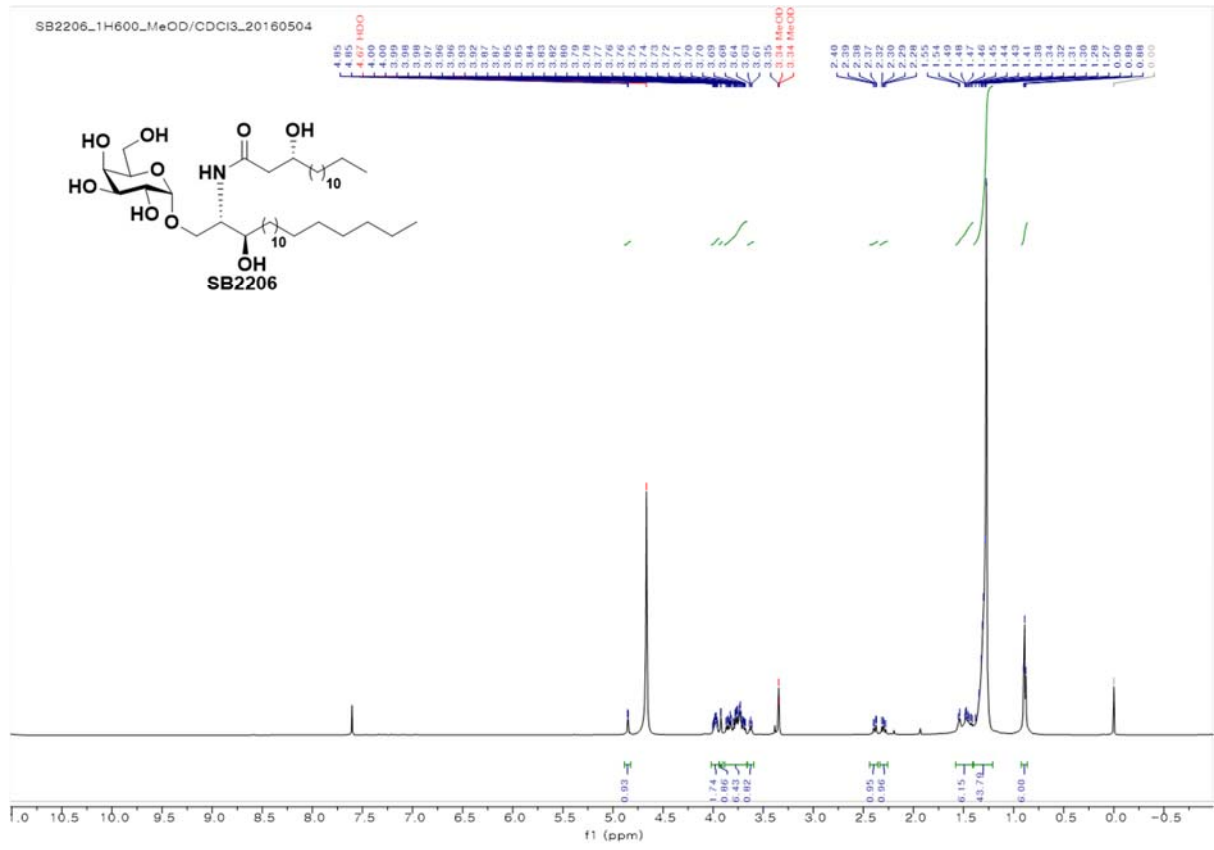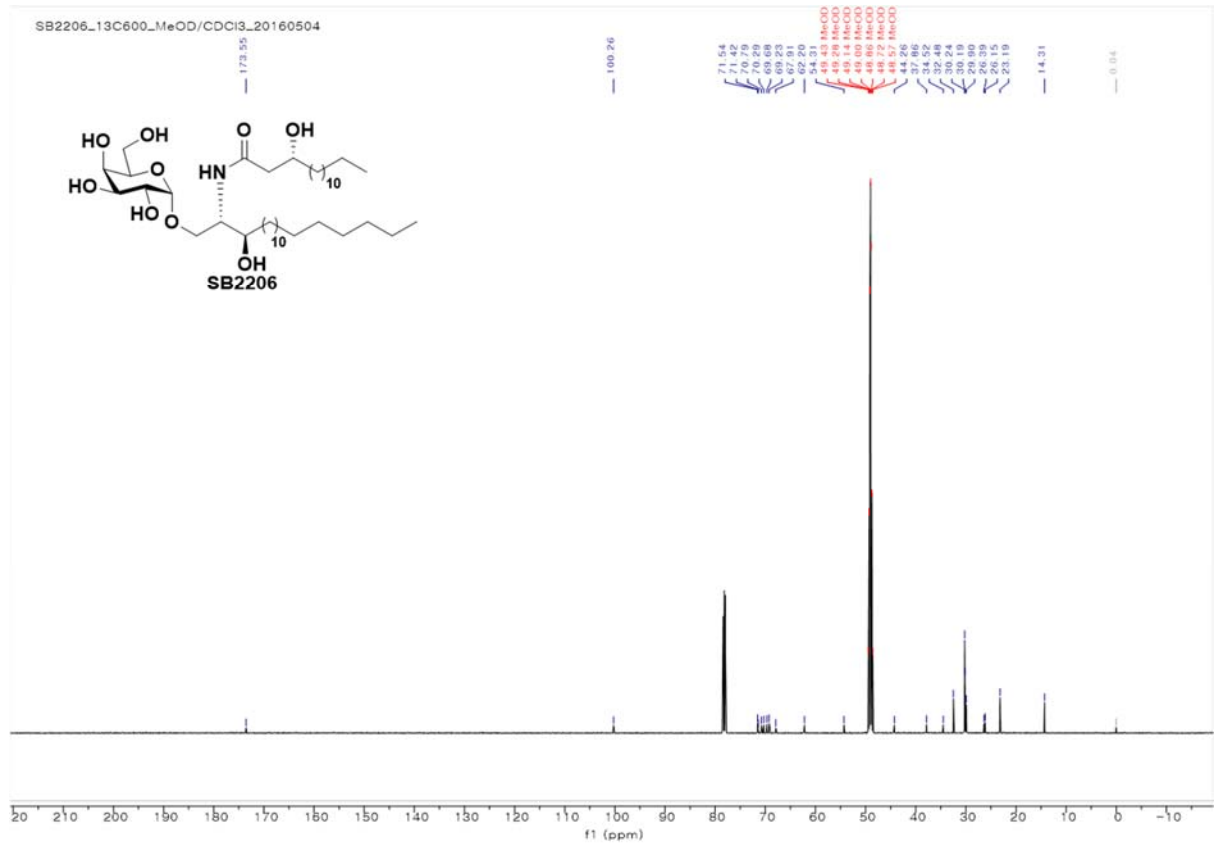

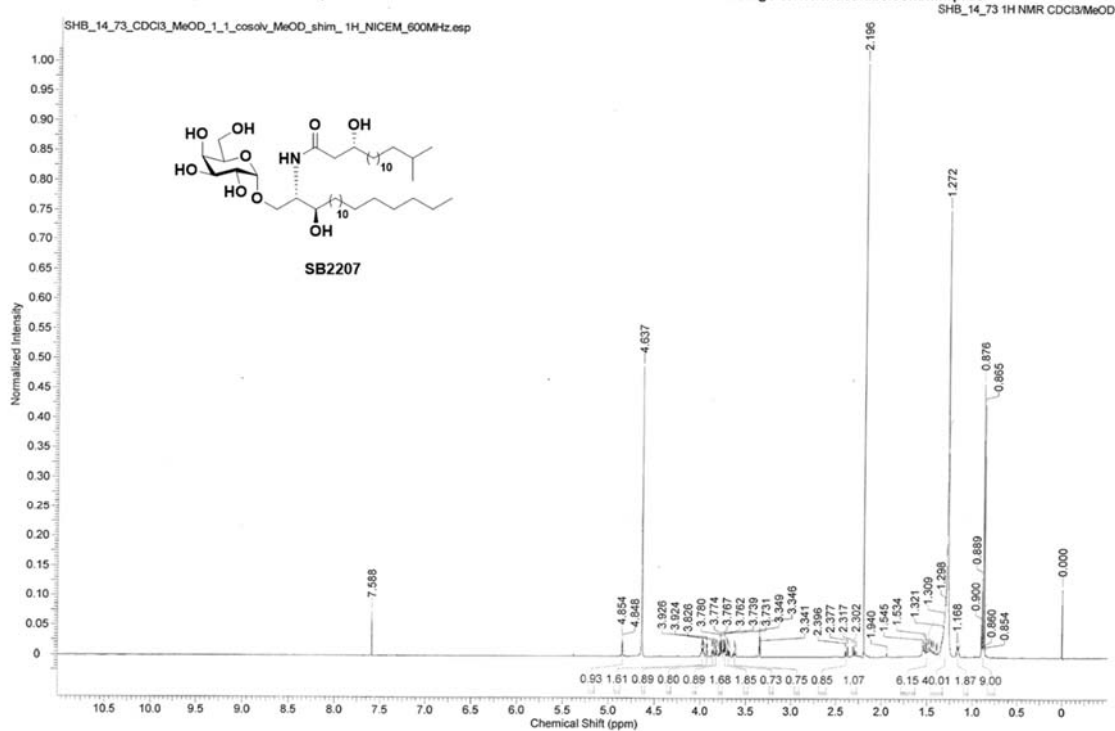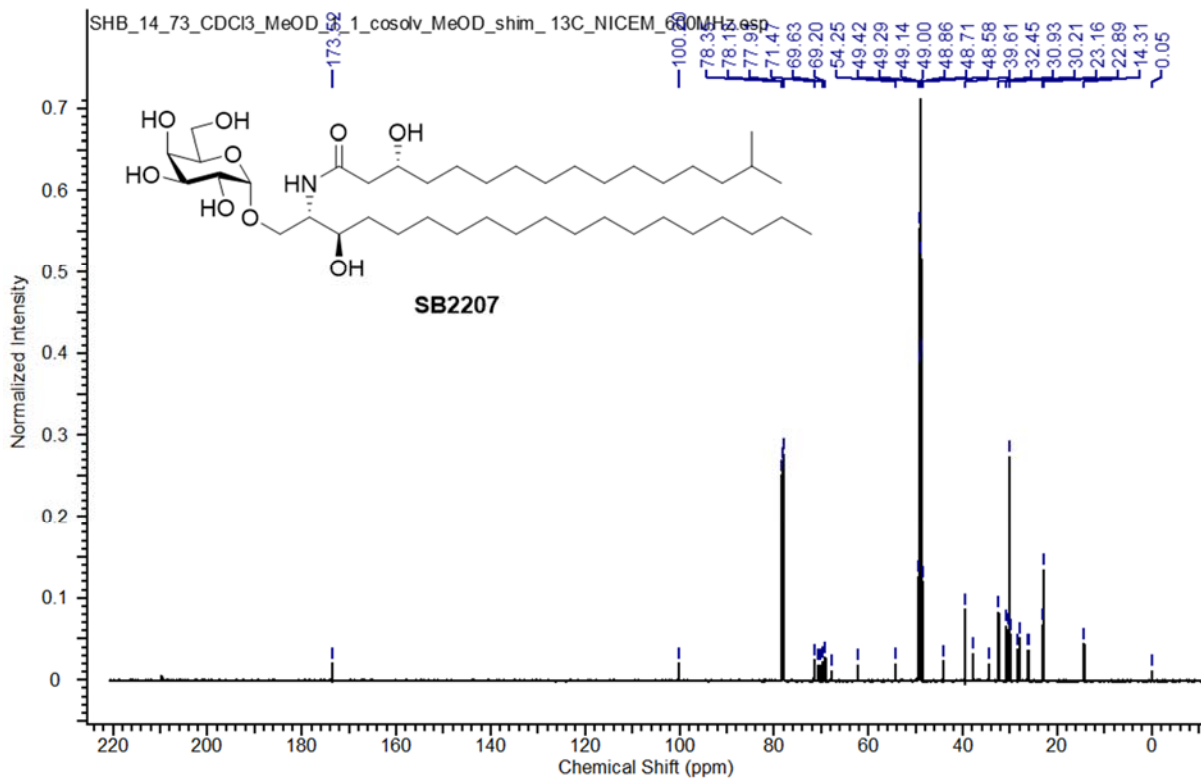

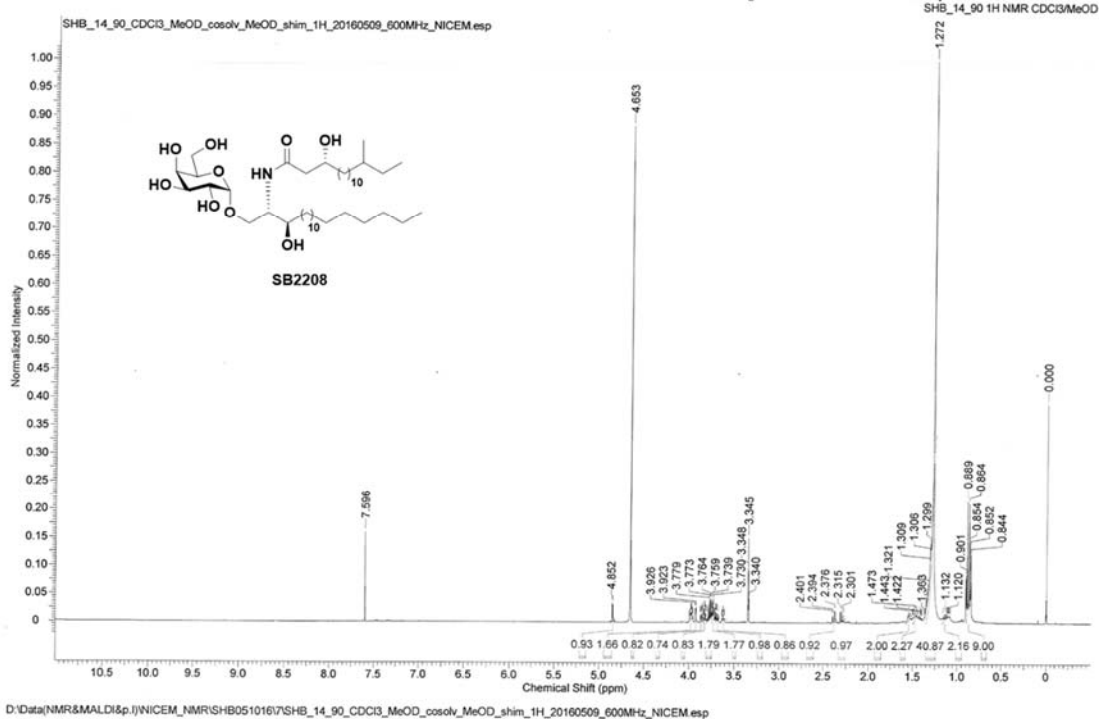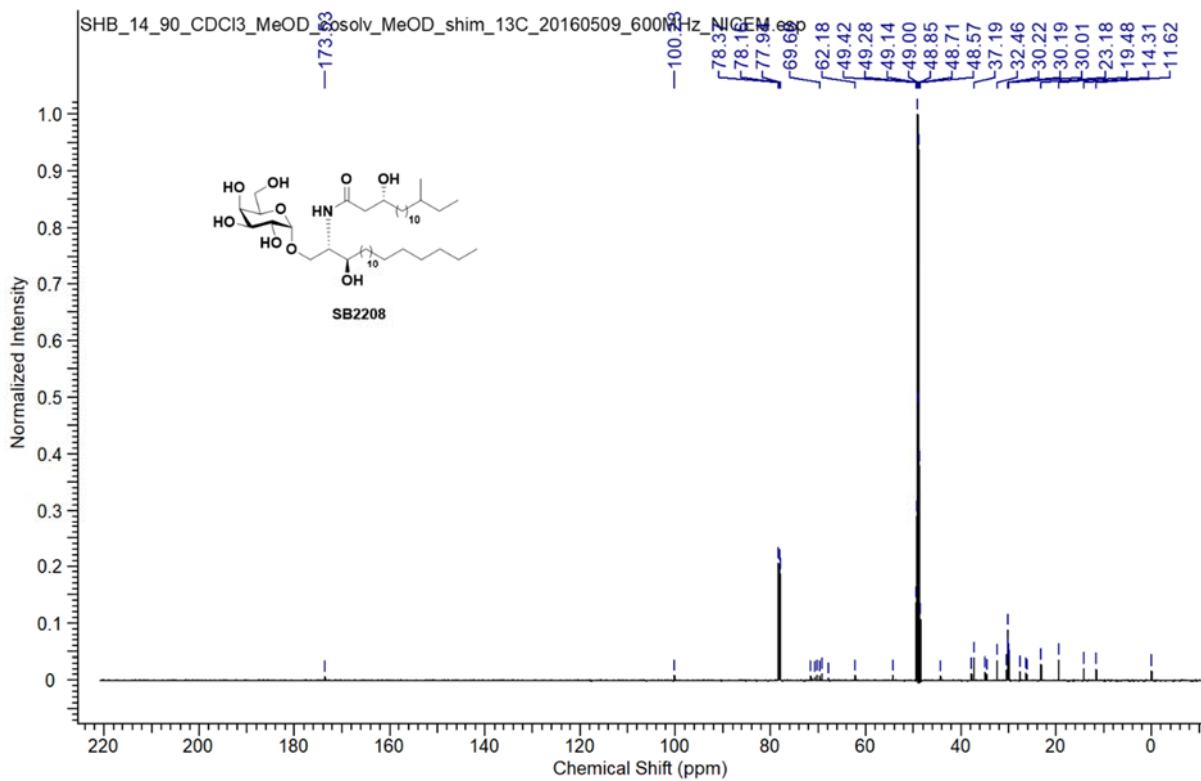

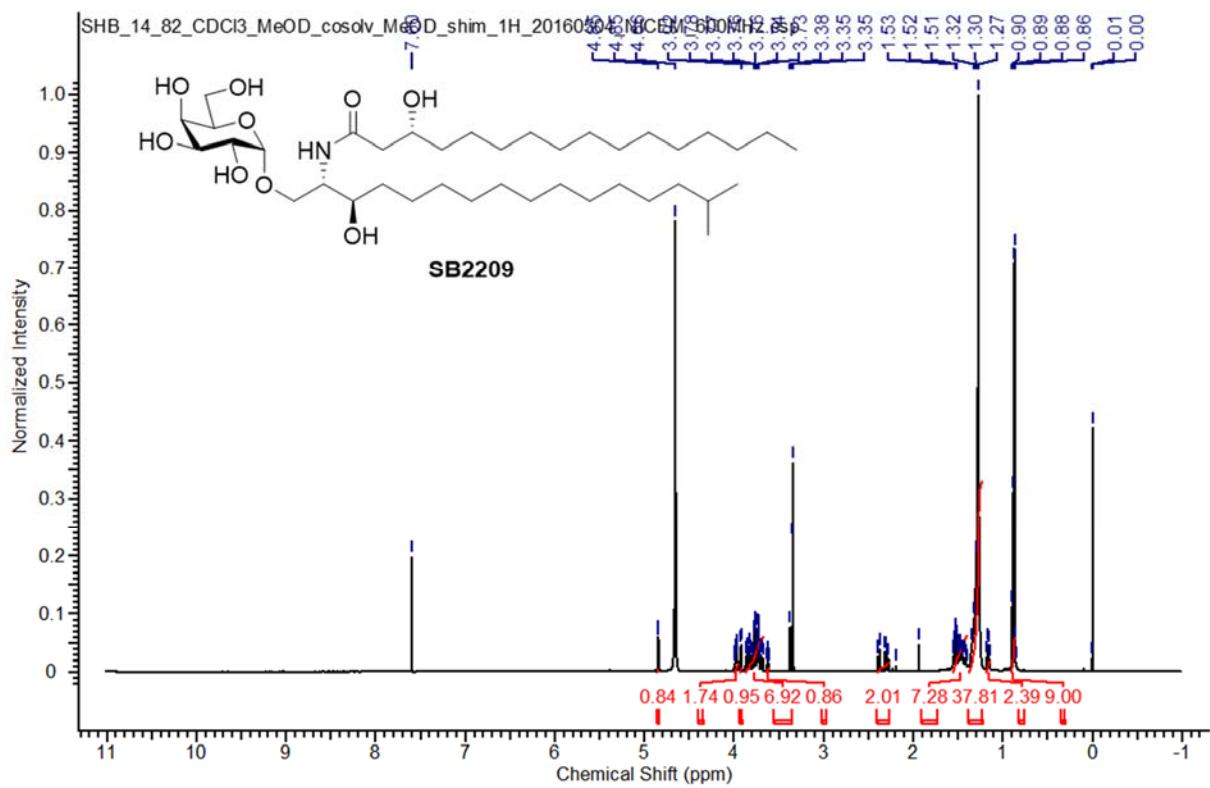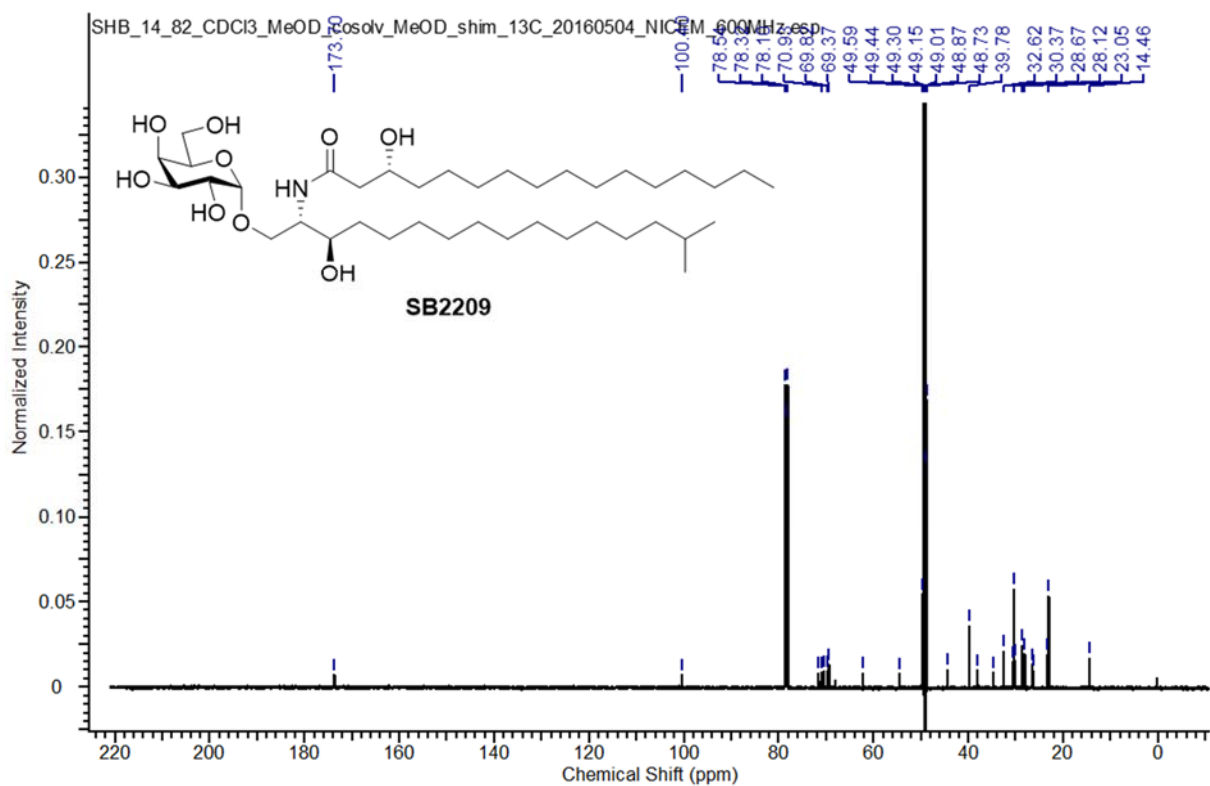



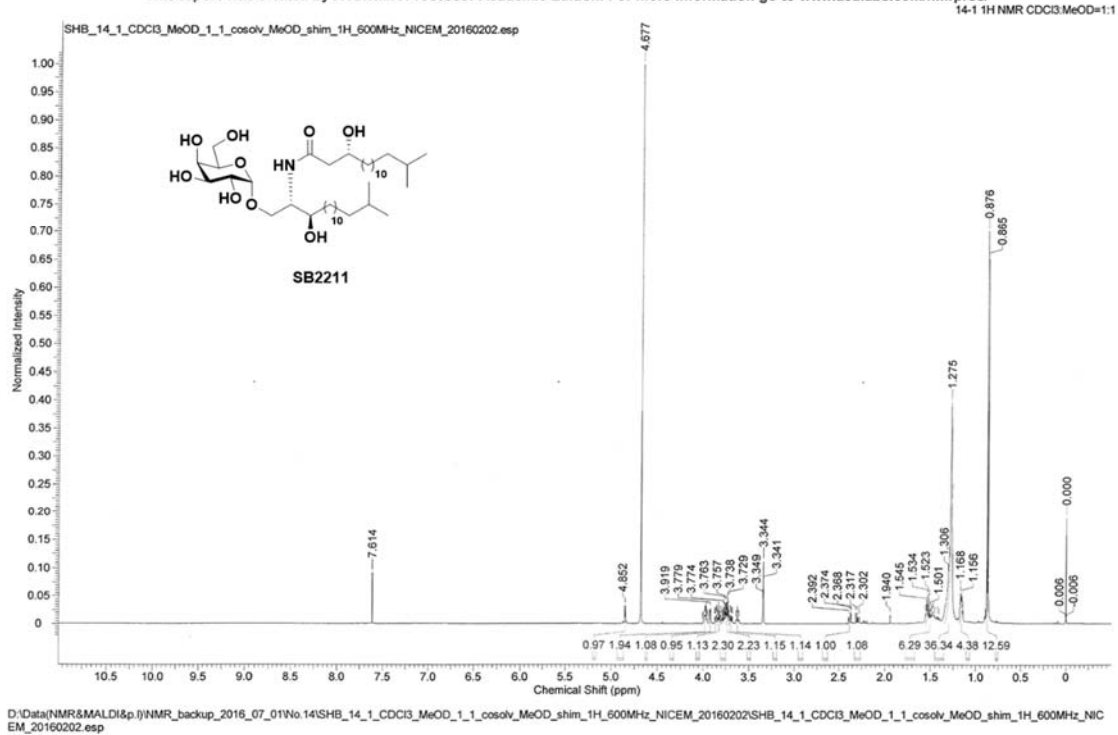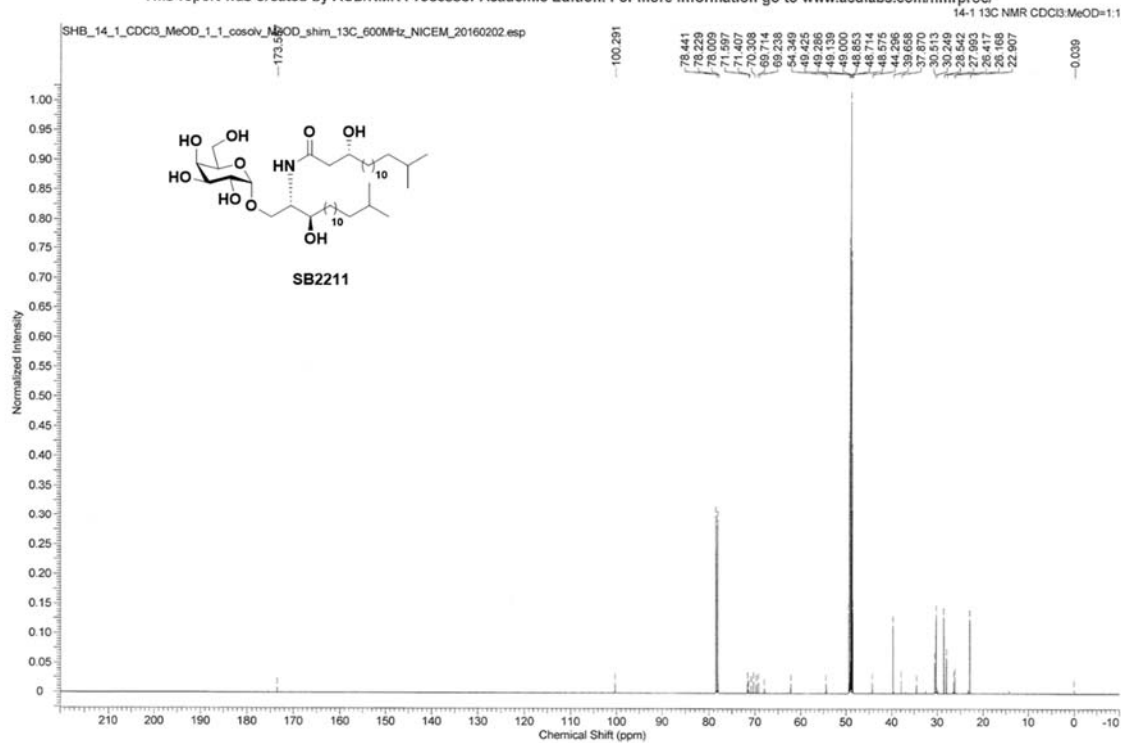

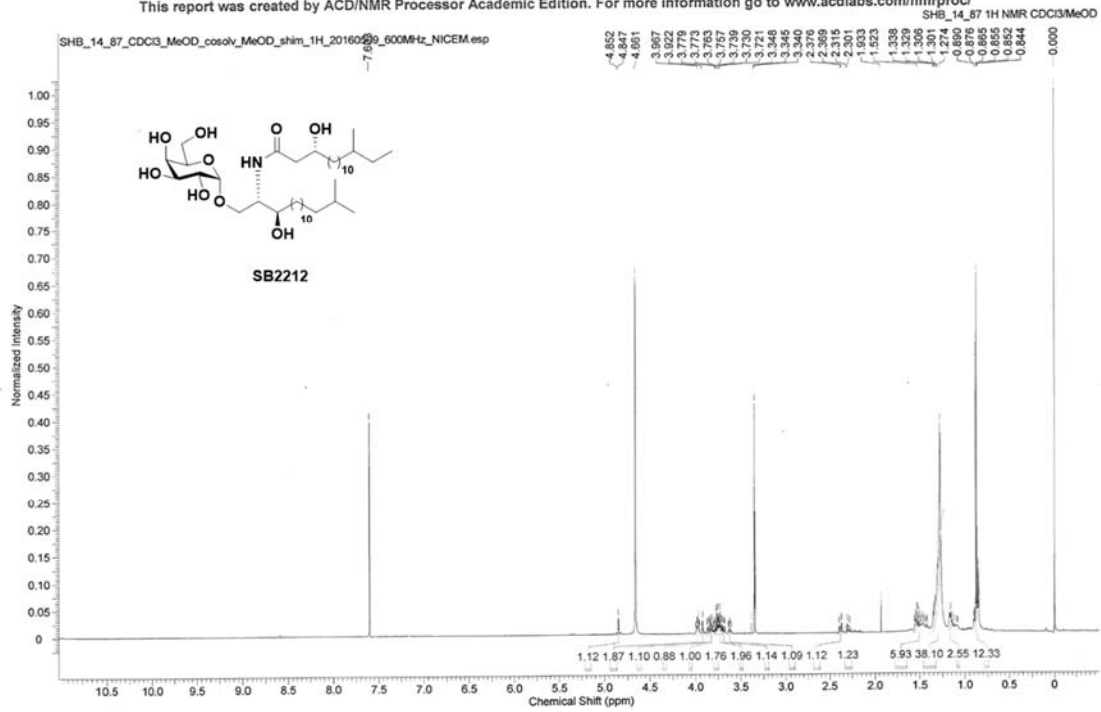

D:\Data\NMR&MALDI\p.1\NICEM\_NMR\SHB051016\3\SHB\_14\_87\_CDCI3\_MeOD\_cosolv\_MeOD\_shim\_1H\_20160509\_600MHz\_NICEM.esp

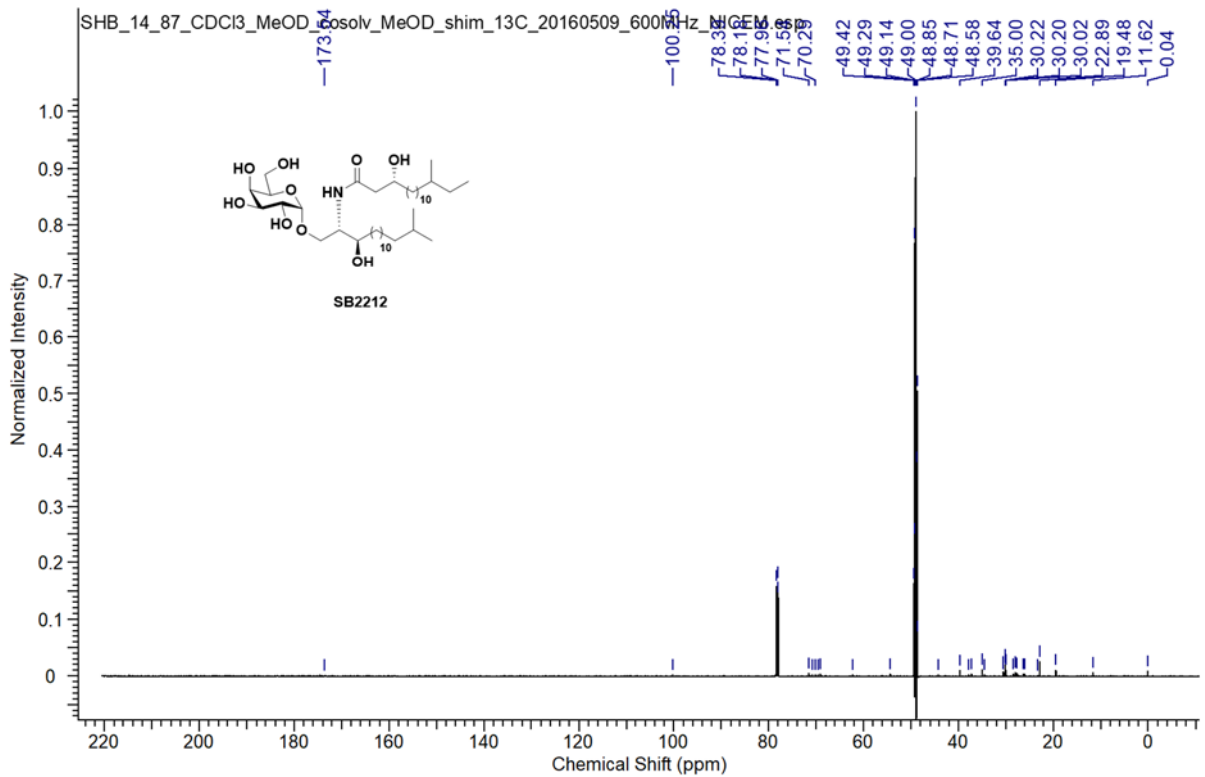



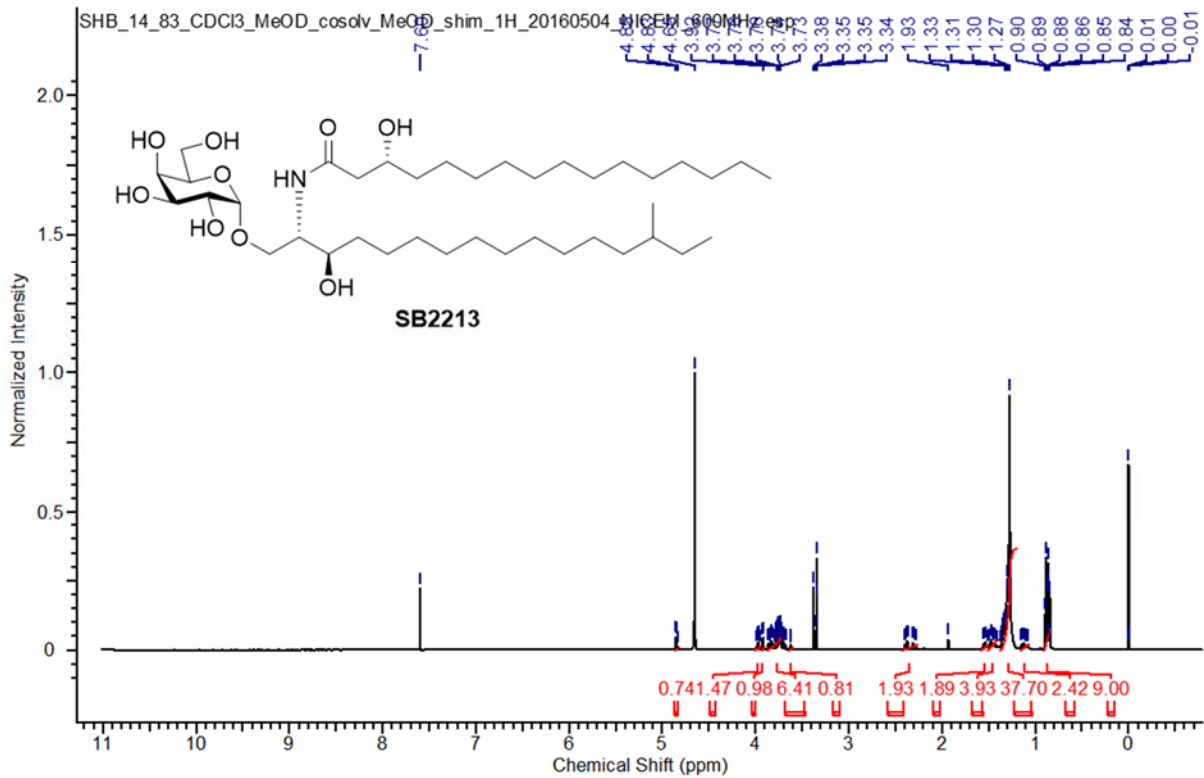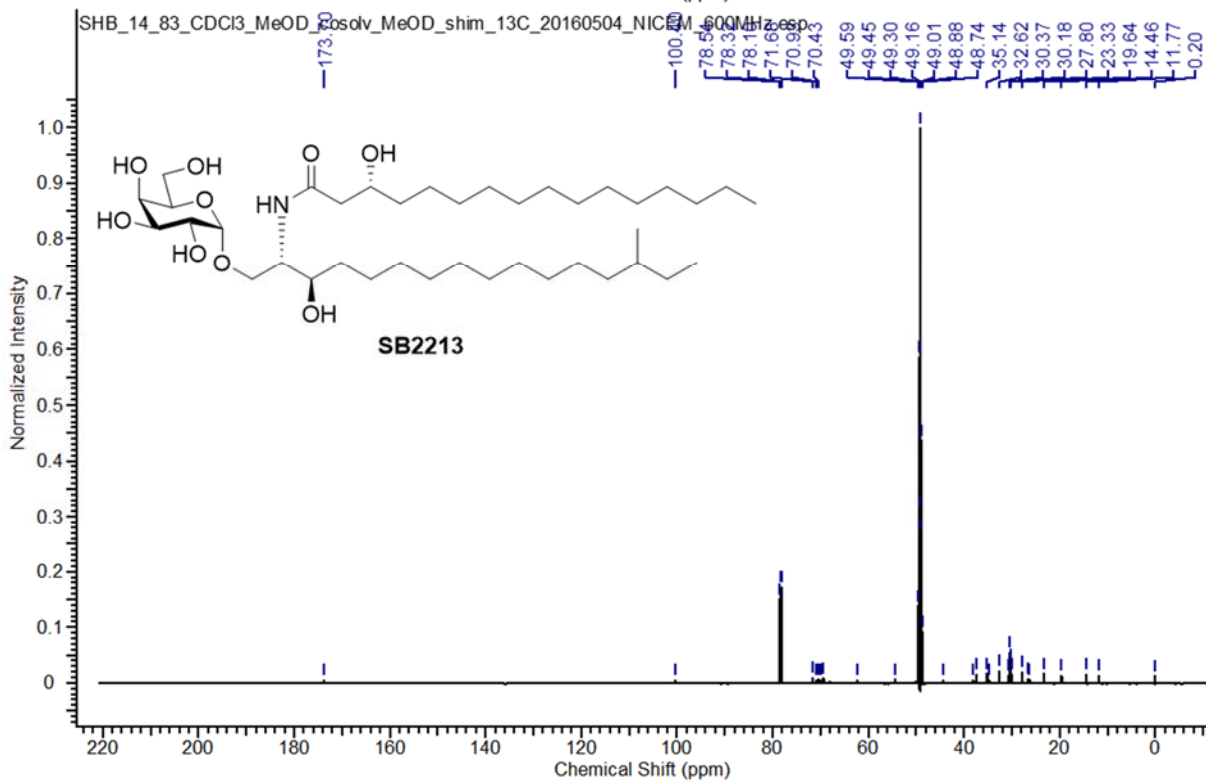



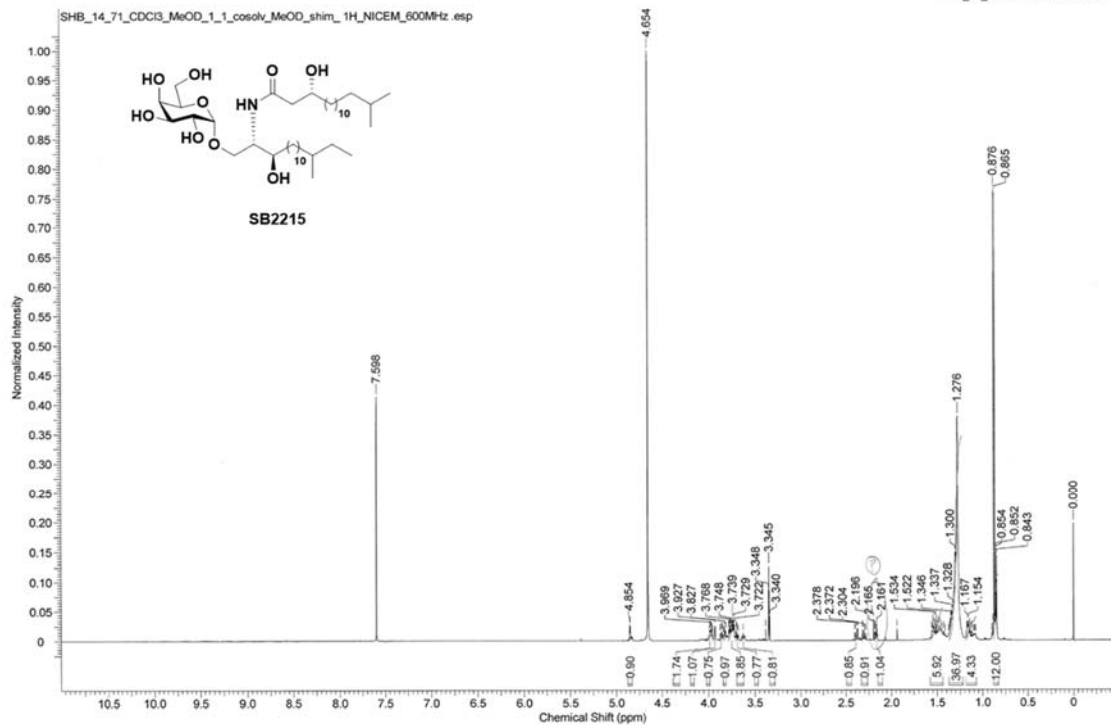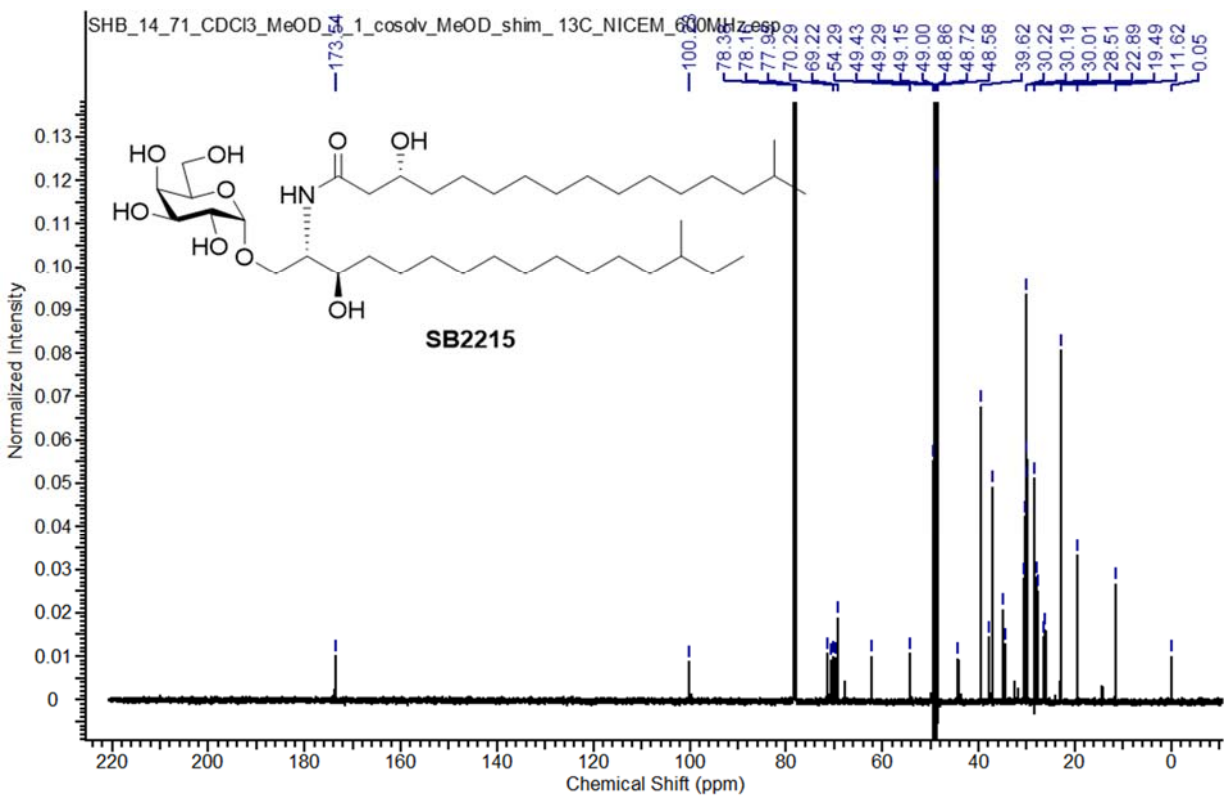

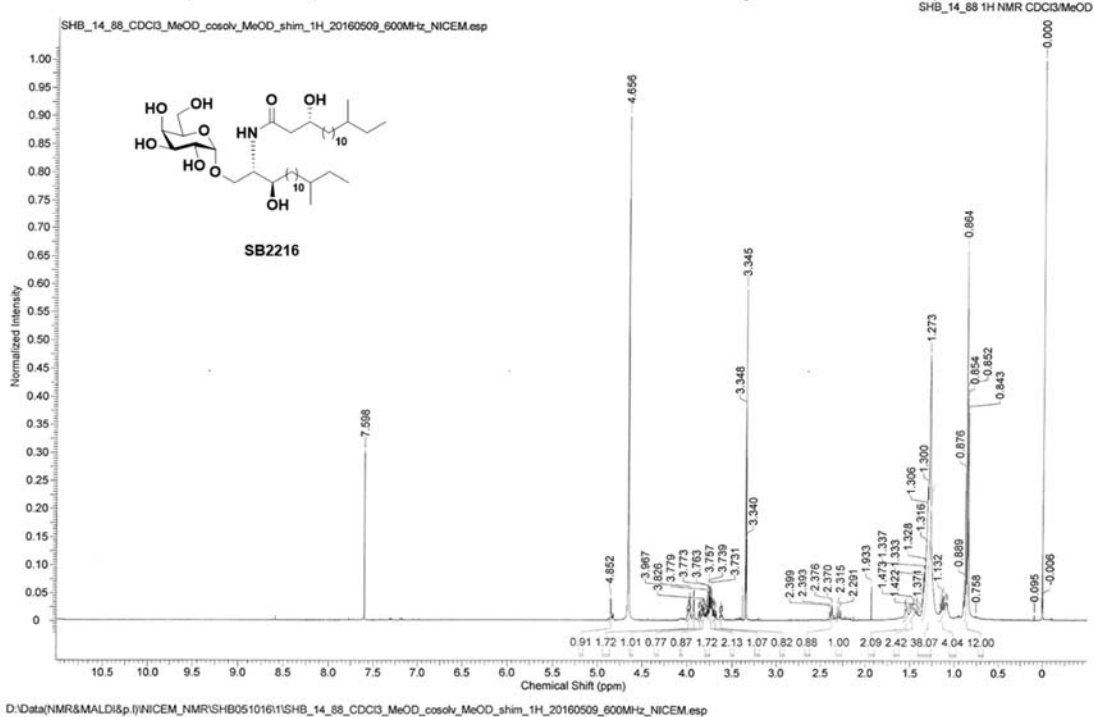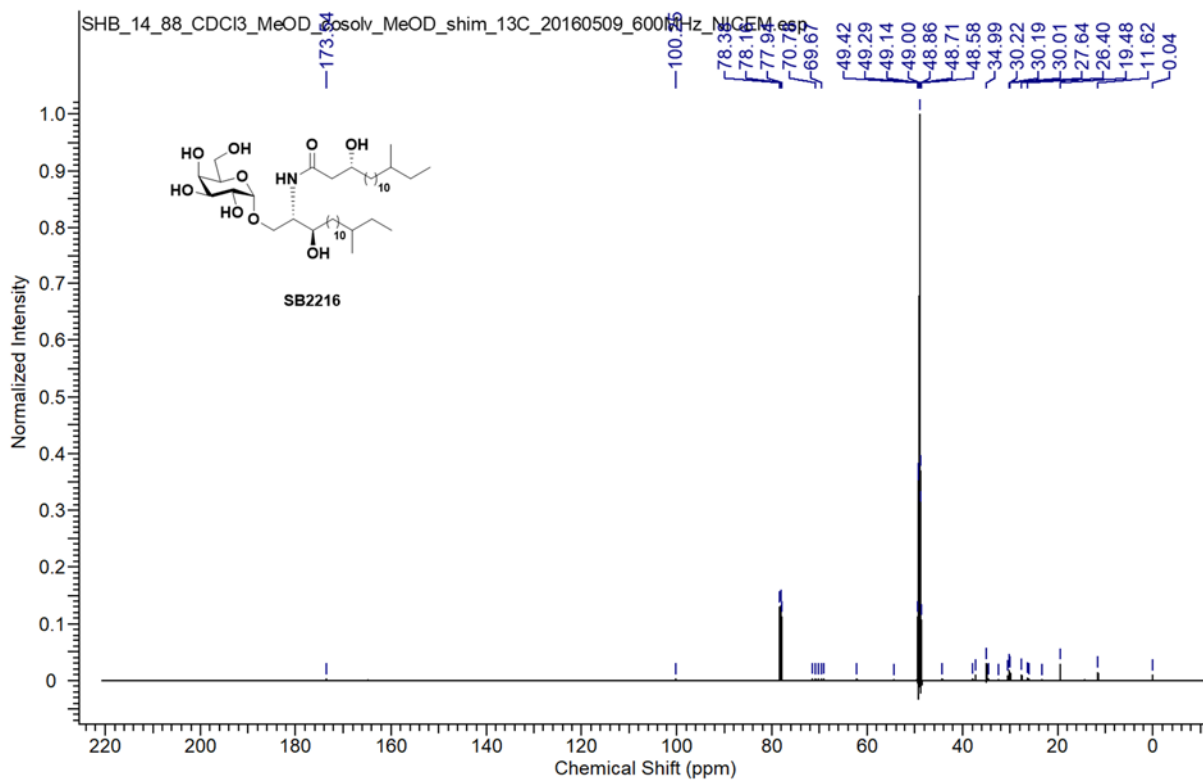

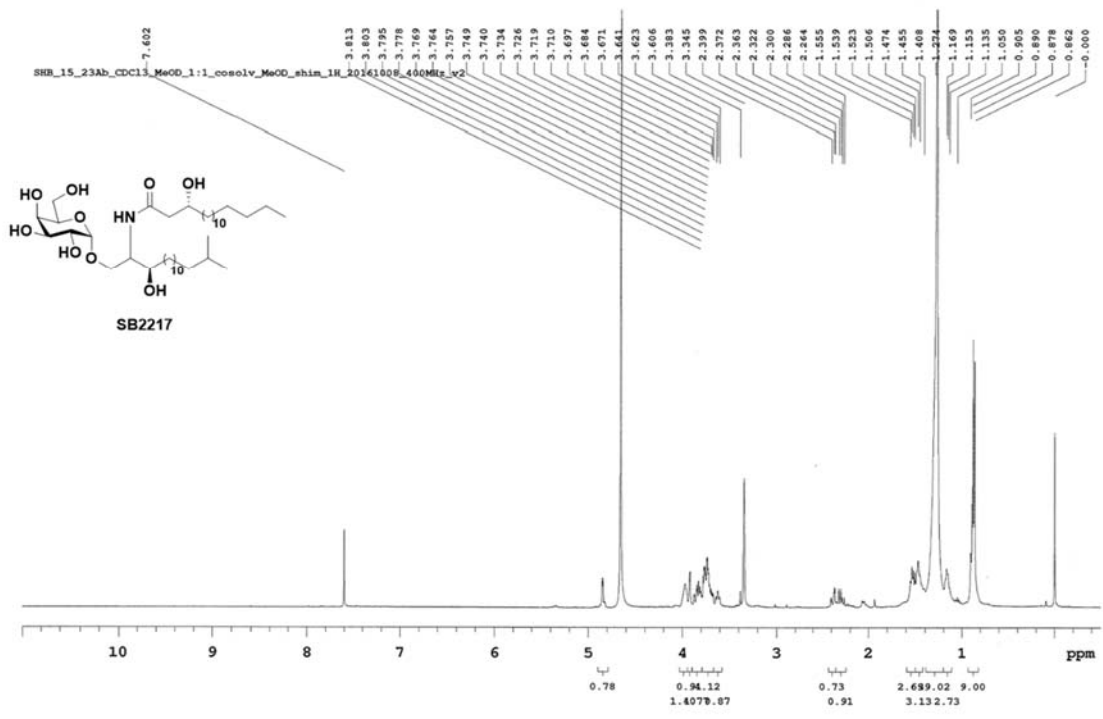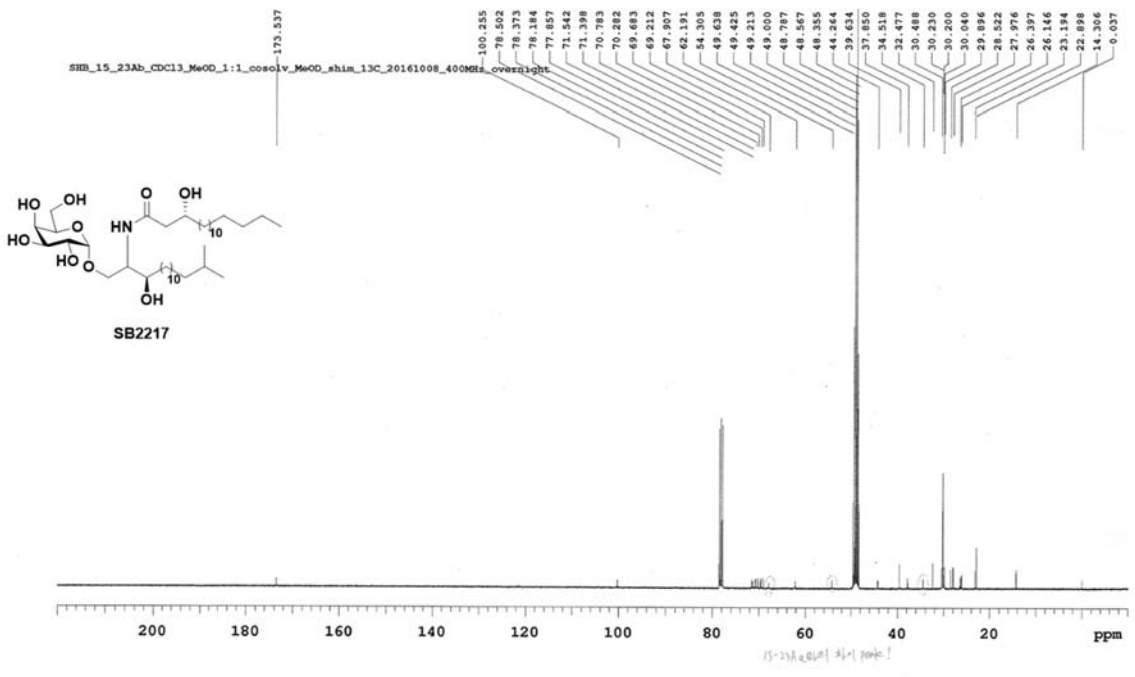

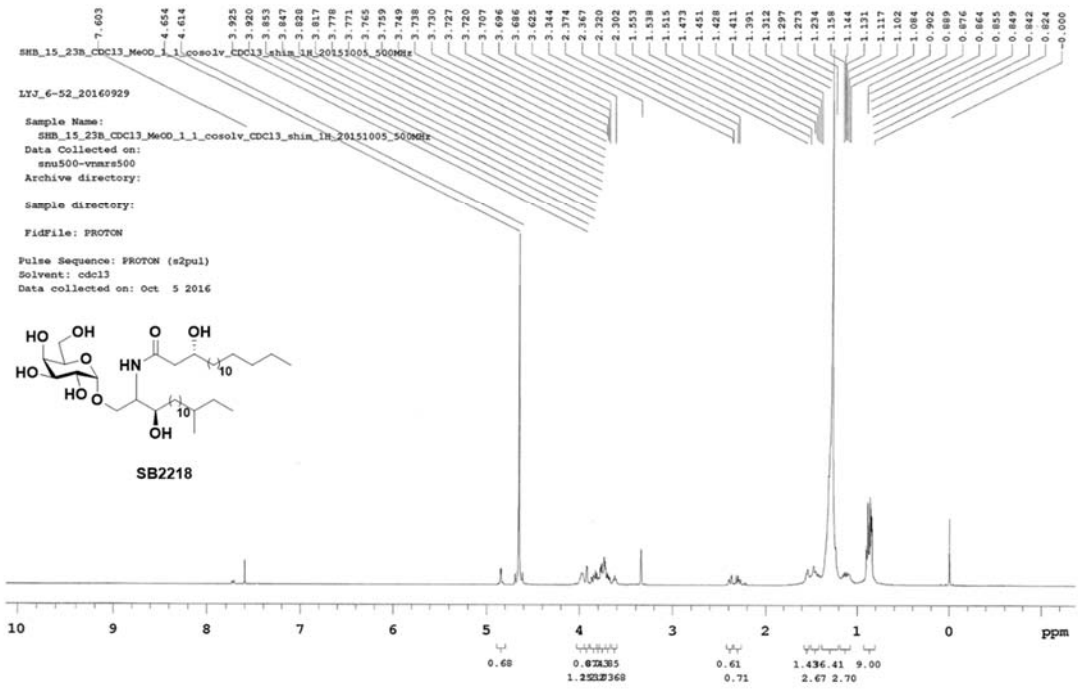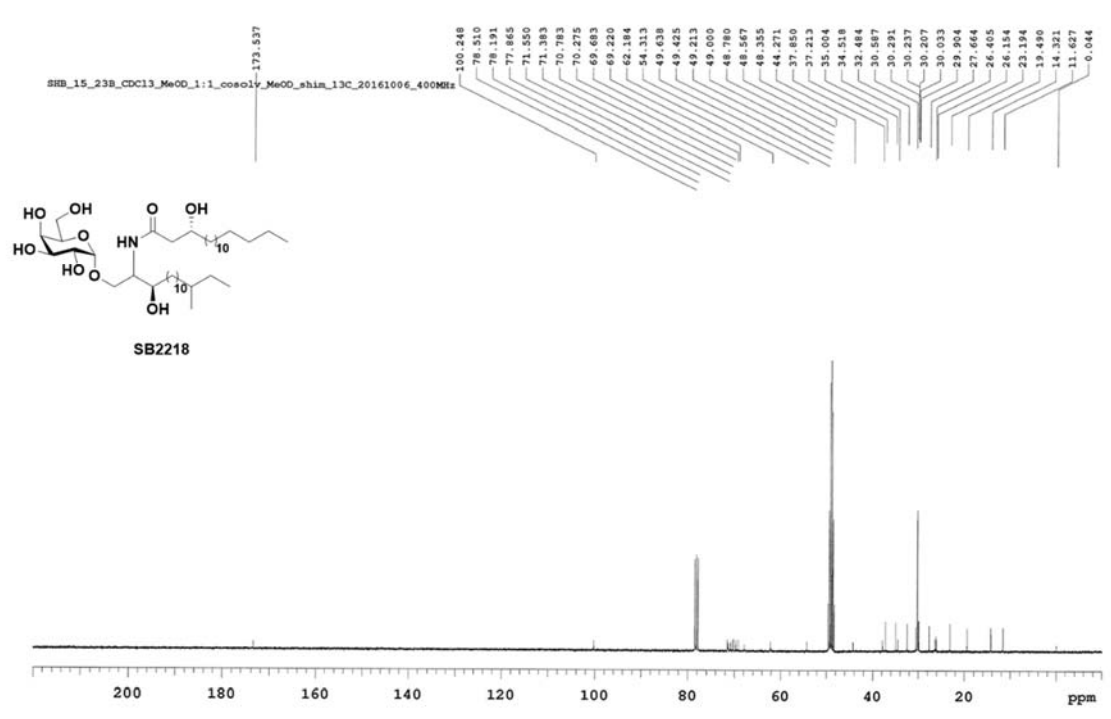

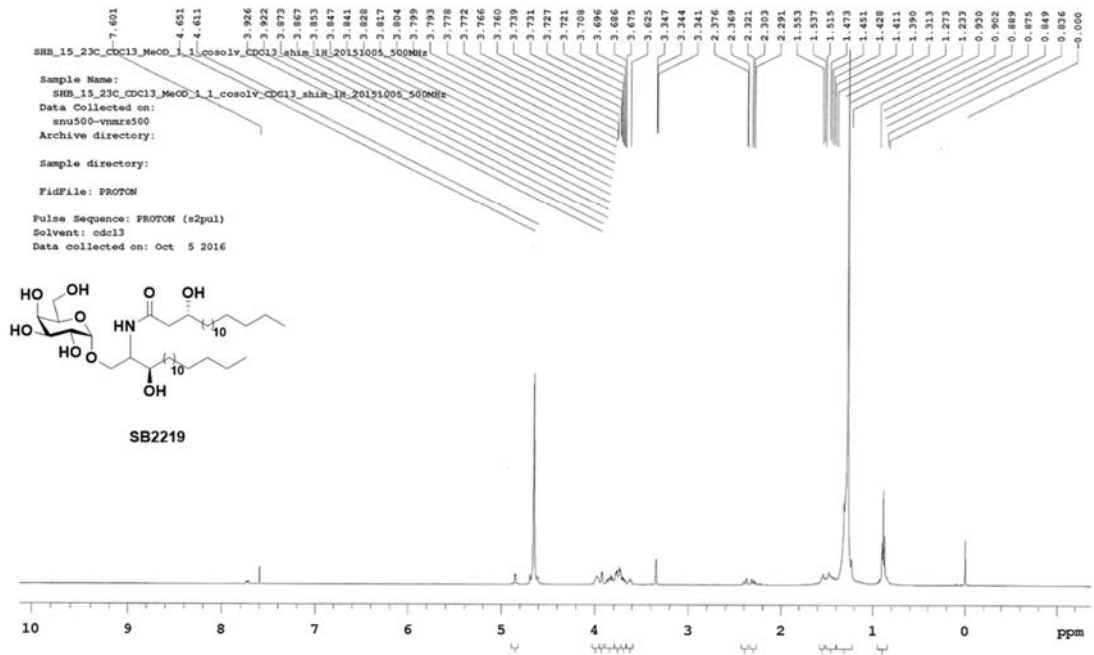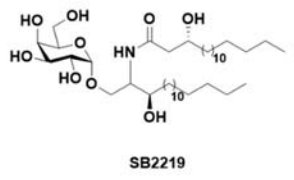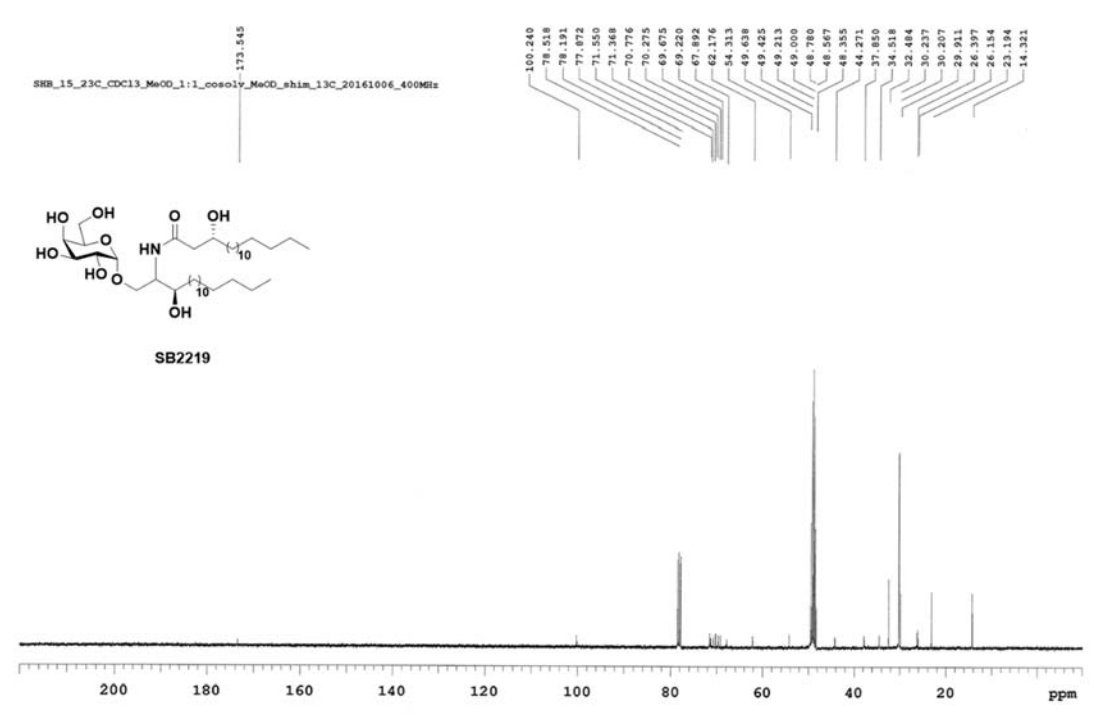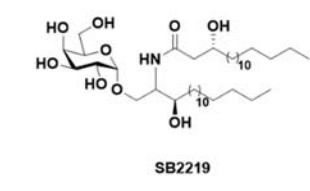

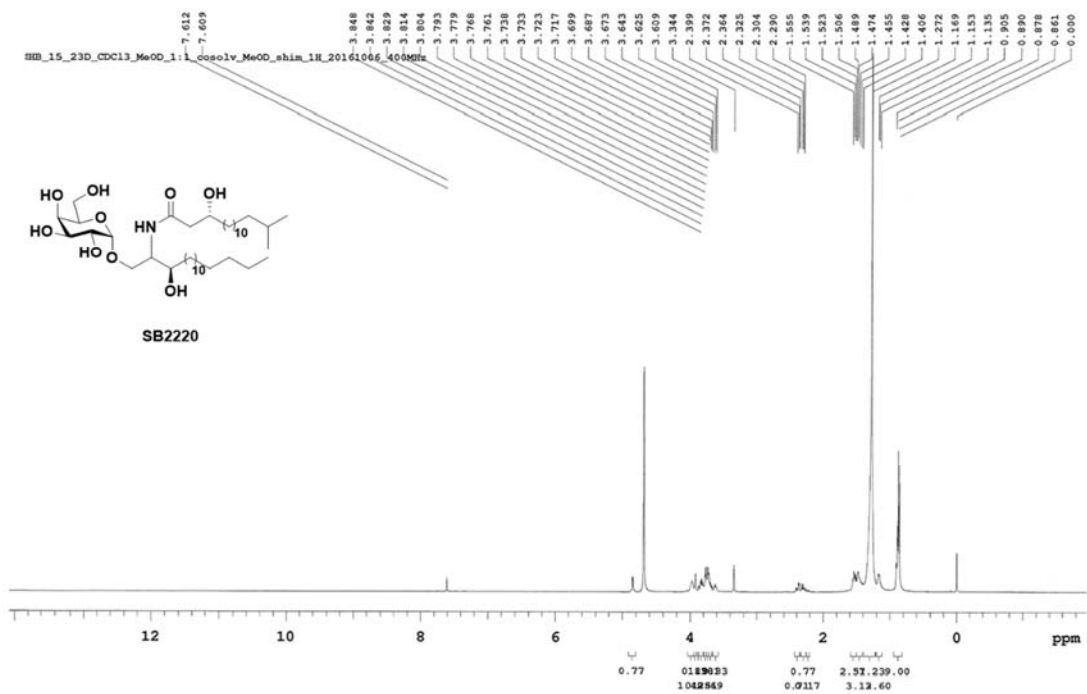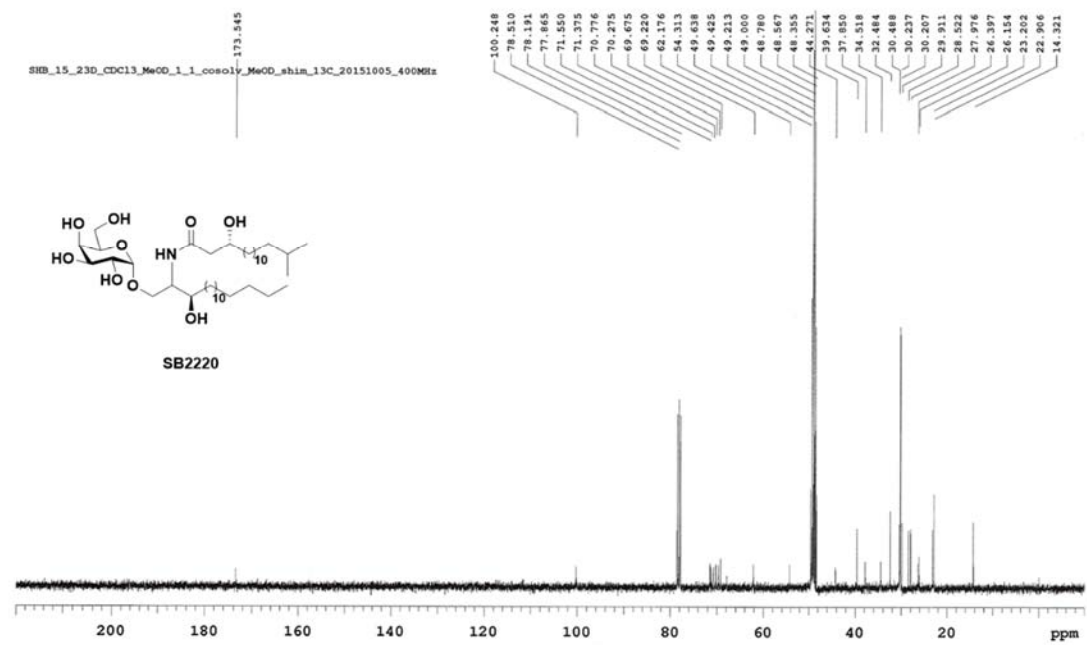



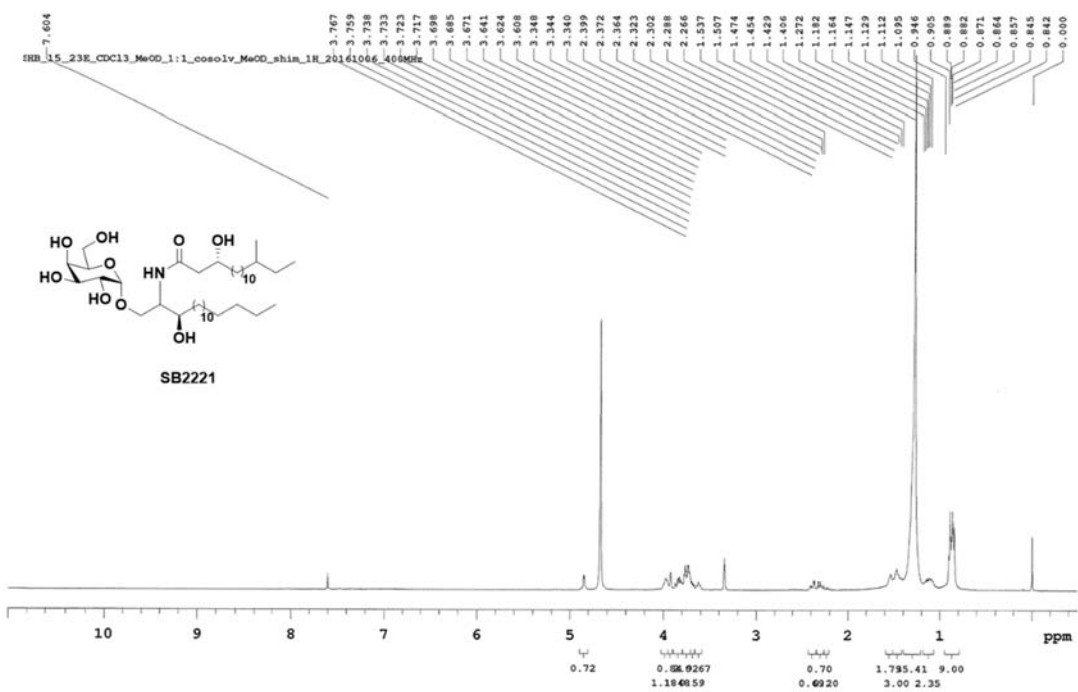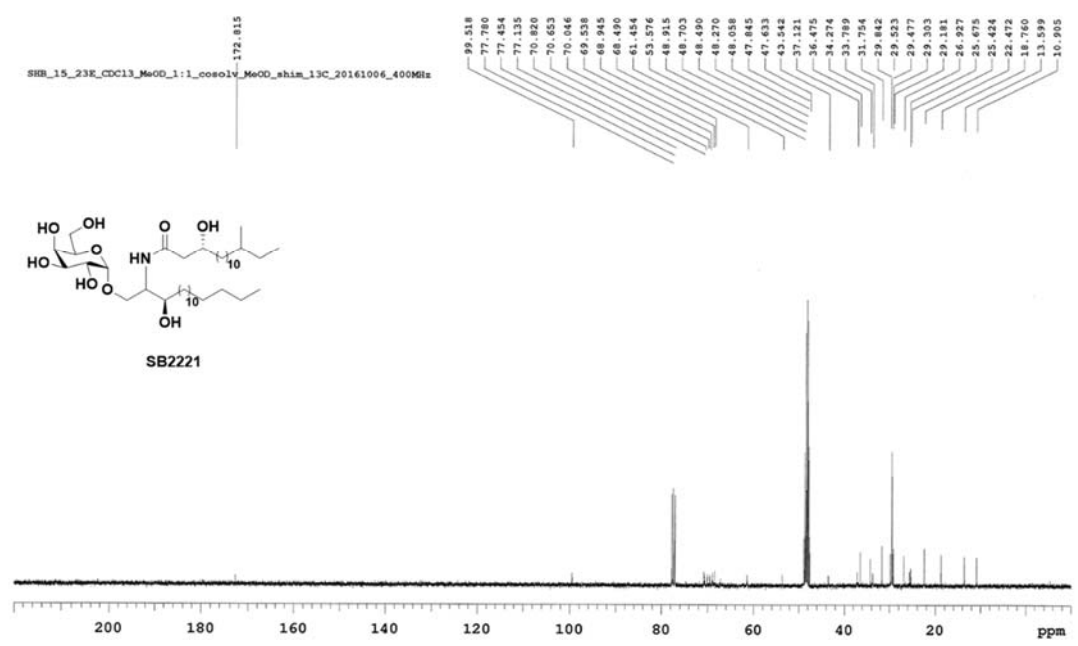

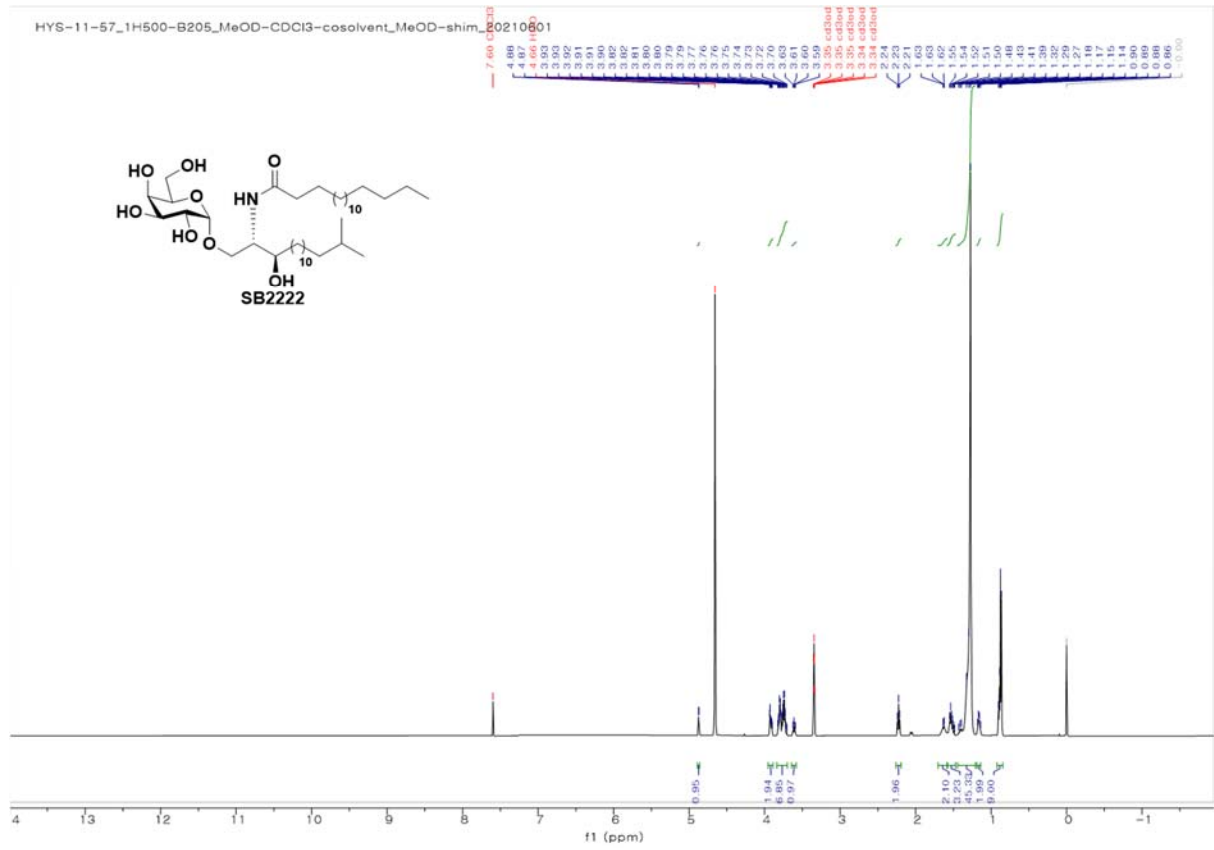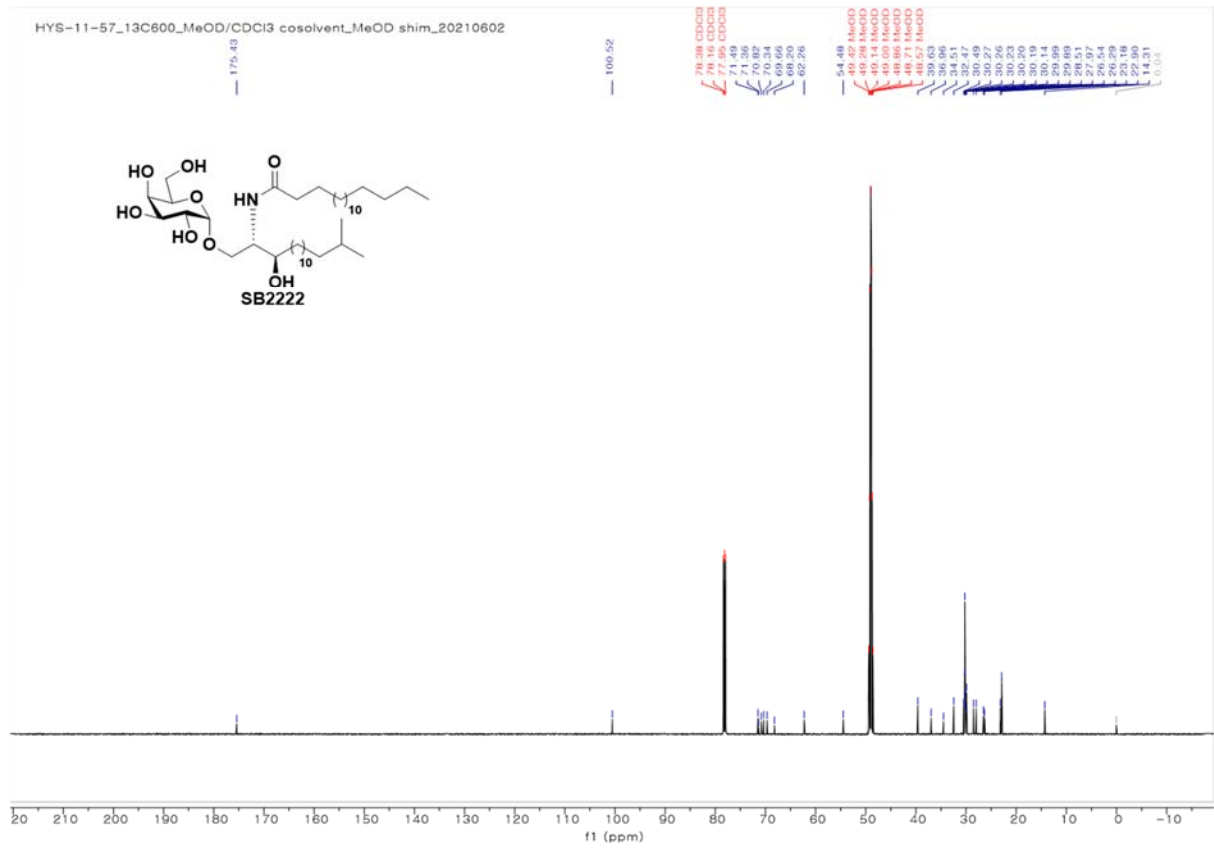

Supplement: NIHMS1761295-supplement-Supplementary_material.pdf [file NIHMS1761295-supplement-Supplementary_material.pdf]
